# Supplementary material for: Transcriptome and Regional Association Analyses Reveal the Effects of Oleosin Genes on the Accumulation of Oil Content in Brassica napus
Source: Plants (Basel). 2022 Nov 16;11(22):3140. doi: 10.3390/plants11223140 (PMC9698637; doi:10.3390/plants11223140)
Supplement: Supplementary file 1 [file plants-11-03140-s001.zip]

Archive with 11 entries (11 files):
- Supplementary Figures.pdf
- Table S1.xlsx
- Table S10.xlsx
- Table S2.xlsx
- Table S3.xlsx
- Table S4.xlsx
- Table S5.xlsx
- Table S6.xlsx
- Table S7.xlsx
- Table S8.xlsx
- Table S9.xlsx
