# Supplementary material for: Transcriptome and Regional Association Analyses Reveal the Effects of Oleosin Genes on the Accumulation of Oil Content in Brassica napus
Source: Plants (Basel). 2022 Nov 16;11(22):3140. doi: 10.3390/plants11223140 (PMC9698637; doi:10.3390/plants11223140)
Supplement: Supplementary file 1 [file plants-11-03140-s001.zip › Table S1.xlsx]

## Sheet: Sheet1
Table S1. List of oleosin genes identified in Arabidopsis and B. napus.
Gene name	Gene ID	Arabidopsis	Lineages	genelength	exon	intron	Length(aa)	Chromosome location
BnGRP14-A03	BnaA03g02110D	AT5G07510/AtGRP14	T oleosin	1181	2	1	207	chrA03:964861..966041
BnGRP14-C02	BnaC02g01570D		T oleosin	3553	3	2	870	chrC02:633723..637275
BnGRP14-C03	BnaC03g03140D		T oleosin	1996	3	2	214	chrC03:1516588..1518583
BnGRP14-C09	BnaC09g47930D		T oleosin	1058	2	1	171	chrC09:47002663..47003720
BnGRP18-A08	BnaA08g22860D	AT5G07520/AtGRP18	T oleosin	1070	2	1	209	chrA08:16473505..16474574
BnGRP17-A03	BnaA03g02100D	AT5G07530/AtGRP17	T oleosin	1159	2	1	272	chrA03:962155..963313
BnGRP17-A10a	BnaA10g23950D		T oleosin	1063	2	1	175	chrA10:15705746..15706808
BnGRP17-A10b	BnaA10g23960D		T oleosin	1129	2	1	195	chrA10:15711917..15713045
BnGRP17-A10c	BnaA10g23970D		T oleosin	1360	2	1	341	chrA10:15719886..15721245
BnGRP17-Ann	BnaAnng13740D		T oleosin	6250	3	2	1917	chrAnn_random:14663058..14669307
BnGRP17-Cnn	BnaCnng60890D		T oleosin	836	2	1	256	chrCnn_random:60763663..60764498
BnGRP16-A10	BnaA10g30180D	AT5G07540/AtGRP16	T oleosin	1816	2	1	203	chrA10_random:2101896..2103711
BnGRP16-Cnn	BnaCnng36370D		T oleosin	1081	2	1	229	chrCnn_random:34856706..34857786
BnGRP19-A03	BnaA03g02120D	AT5G07550/AtGRP19	T oleosin	916	1	0	79	chrA03:967459..968374
BnGRP19-A10	BnaA10g30190D		T oleosin	994	2	1	108	chrA10_random:2105832..2106825
BnGRP19-C03	BnaC03g03150D		T oleosin	1109	2	1	116	chrC03:1519876..1520984
BnGRP19-Cnn	BnaCnng36380D		T oleosin	1035	2	1	108	chrCnn_random:34859014..34860048
BnGRP20-Anna	BnaAnng06430D	AT5G07560/AtGRP20	T oleosin	1507	2	1	149	chrAnn_random:6286251..6287757
BnGRP20-Annb	BnaAnng06440D		T oleosin	1314	1	0	98	chrAnn_random:6288798..6290111
BnGRP20-C02a	BnaC02g01550D		T oleosin	1506	2	1	149	chrC02:627160..628665
BnGRP20-C02b	BnaC02g01560D		T oleosin	1308	2	1	157	chrC02:629668..630975
BnGRP20-C03	BnaC03g03170D		T oleosin	1776	2	1	120	chrC03:1525165..1526940
BnOLEO9-A03	BnaA03g02140D	AT5G07571/AtOLEO9	T oleosin	1748	3	2	119	chrA03:975911..977658
BnOLEO11-A03	BnaA03g40390D	AT5G61610/AtOLEO11	T oleosin	1470	3	2	251	chrA03:20190729..20192198
BnOLEO11-C07	BnaC07g31360D		T oleosin	1462	3	2	251	chrC07:35479311..35480772
BnOLEO4-A02	BnaA02g29000D	AT3G27660/AtOLEO4	SL oleosin	1090	2	1	188	chrA02:21253735..21254824
BnOLEO4-A09	BnaA09g02110D		SL oleosin	1187	2	1	188	chrA09:1040084..1041270
BnOLEO4-C02	BnaC02g37030D		SL oleosin	1231	2	1	191	chrC02:40002669..40003899
BnOLEO7-A03	BnaA03g27410D	AT3G01570/AtOLEO7	SL oleosin	3368	5	4	778	chrA03:13512809..13516176
BnOLEO7-C03	BnaC03g32430D		SL oleosin	3249	4	3	777	chrC03:19921970..19925218
BnOLEO2-A07	BnaA07g14960D	AT5G40420/AtOLEO2	SL oleosin	1382	3	2	200	chrA07:13061213..13062594
BnOLEO2-C04	BnaC04g32530D		SL oleosin	1445	2	1	229	chrC04:34250286..34251730
BnOLEO2-C06	BnaC06g12930D		SL oleosin	1509	3	2	200	chrC06:15634774..15636282
BnOLEO6-A04	BnaA04g15210D	AT2G25890/AtOLEO6	SH oleosin	441	1	0	146	chrA04:12660472..12660912
BnOLEO6-C04	BnaC04g38160D		SH oleosin	438	1	0	145	chrC04:39433420..39433857
BnOLEO3-A10	BnaA10g05760D	AT5G51210/AtOLEO3	SH oleosin	782	2	1	149	chrA10:3966784..3967565
BnOLEO3-C09	BnaC09g27370D		SH oleosin	1557	2	1	149	chrC09:29151518..29153074
BnOLEO1-A01	BnaA01g14480D	AT4G25140/AtOLEO1	SH oleosin	1226	3	2	171	chrA01:7305082..7306307
BnOLEO1-A03	BnaA03g47170D		SH oleosin	1338	2	1	183	chrA03:24188857..24190194
BnOLEO1-A08	BnaA08g14540D		SH oleosin	1222	2	1	180	chrA08:12282608..12283829
BnOLEO1-C01	BnaC01g17050D		SH oleosin	1213	3	2	170	chrC01:11676131..11677343
BnOLEO1-C07	BnaC07g39370D		SH oleosin	1086	2	1	186	chrC07:40278874..40279959
BnOLEO1-C08	BnaC08g11970D		SH oleosin	1657	3	2	179	chrC08:17257794..17259450
BnOLEO5-A06	BnaA06g03370D	AT1G48990/AtOLEO5	U oleosin	2595	7	6	517	chrA06:2059111..2061705
BnOLEO5-CO6	BnaC06g02430D		U oleosin	2610	7	6	517	chrC06:3184669..3187278
BnOLEO5-C08	BnaC08g03140D		U oleosin	423	1	0	140	chrC08:2826379..2826801
BnOLEO8-A01	BnaA01g26680D	AT3G18570/AtOLEO8	U oleosin	495	1	0	164	chrA01:18669237..18669731
BnOLEO8-A03	BnaA03g34830D		U oleosin	498	1	0	165	chrA03:17011078..17011575
BnOLEO8-A05	BnaA05g21590D		U oleosin	498	1	0	165	chrA05:16610133..16610630
BnOLEO8-A10	BnaA10g05240D		U oleosin	495	1	0	164	chrA10:2963139..2963633
BnOLEO8-C01	BnaC01g34070D		U oleosin	495	1	0	164	chrC01:33257398..33257892
BnOLEO8-C03	BnaC03g40520D		U oleosin	498	1	0	165	chrC03:25478827..25479324
BnOLEO8-C05	BnaC05g34600D		U oleosin	498	1	0	165	chrC05:33883325..33883822
