# Supplementary material for: Transcriptome and Regional Association Analyses Reveal the Effects of Oleosin Genes on the Accumulation of Oil Content in Brassica napus
Source: Plants (Basel). 2022 Nov 16;11(22):3140. doi: 10.3390/plants11223140 (PMC9698637; doi:10.3390/plants11223140)
Supplement: Supplementary file 1 [file plants-11-03140-s001.zip › Table S2.xlsx]

## Sheet: Sheet1
Table S2. The cis-elements on the promoter regions of oleosin genes in B. napus.
Gene name	Gene ID	Motif Name	Motif Sequence	Motif Position	Matrix Score（bp）	Strand	Organism	Description	Description Type
BnGRP17-Ann	BnaAnng13740D	TATA-box	TATAAAA	25	7	-	Pisum sativum	core promoter element around -30 of transcription start	core promoter element transcription start
BnGRP17-Ann	BnaAnng13740D	TATA-box	TATAAA	26	6	-	Helianthus annuus	core promoter element around -30 of transcription start	core promoter element transcription start
BnGRP17-Ann	BnaAnng13740D	TATA-box	TATAA	27	5	-	Arabidopsis thaliana	core promoter element around -30 of transcription start	core promoter element transcription start
BnGRP17-Ann	BnaAnng13740D	TATA-box	TATA	28	4	+	Arabidopsis thaliana	core promoter element around -30 of transcription start	core promoter element transcription start
BnGRP17-Ann	BnaAnng13740D	TGACG-motif	TGACG	37	5	-	Hordeum vulgare	cis-acting regulatory element involved in the MeJA-responsiveness	MeJA-responsiveness
BnGRP17-Ann	BnaAnng13740D	CGTCA-motif	CGTCA	37	5	+	Hordeum vulgare	cis-acting regulatory element involved in the MeJA-responsiveness	MeJA-responsiveness
BnGRP17-Ann	BnaAnng13740D		motif_sequence	54	4	+	organism	short_function	short_function
BnGRP17-Ann	BnaAnng13740D		motif_sequence	59	4	+	organism	short_function	short_function
BnGRP17-Ann	BnaAnng13740D	AE-box	AGAAACAA	74	8	-	Arabidopsis thaliana	part of a module for light response	light response
BnGRP17-Ann	BnaAnng13740D	CAAT-box	CCAAT	116	5	-	Arabidopsis thaliana	common cis-acting element in promoter and enhancer regions	promoter and enhancer regions
BnGRP17-Ann	BnaAnng13740D	CAAT-box	CAAAT	166	5	-	Pisum sativum	common cis-acting element in promoter and enhancer regions	promoter and enhancer regions
BnGRP17-Ann	BnaAnng13740D	TCA-element	CCATCTTTTT	175	9	-	Nicotiana tabacum	cis-acting element involved in salicylic acid responsiveness	salicylic acid responsiveness
BnGRP17-Ann	BnaAnng13740D	MBSI	aaaAaaC(G/C)GTTA	176	10.5	+	Petunia hybrida	MYB binding site involved in flavonoid biosynthetic genes regulation	MYB binding site
BnGRP17-Ann	BnaAnng13740D	CAAT-box	CAAAT	187	5	-	Pisum sativum	common cis-acting element in promoter and enhancer regions	promoter and enhancer regions
BnGRP17-Ann	BnaAnng13740D		motif_sequence	248	4	-	organism	short_function	short_function
BnGRP17-Ann	BnaAnng13740D	ARE	AAACCA	261	6	+	Zea mays	cis-acting regulatory element essential for the anaerobic induction	anaerobic induction
BnGRP17-Ann	BnaAnng13740D	TATA-box	ATATAT	266	6	+	Brassica napus	core promoter element around -30 of transcription start	core promoter element transcription start
BnGRP17-Ann	BnaAnng13740D	TATA-box	TATA	267	4	+	Arabidopsis thaliana	core promoter element around -30 of transcription start	core promoter element transcription start
BnGRP17-Ann	BnaAnng13740D	CGTCA-motif	CGTCA	312	5	-	Hordeum vulgare	cis-acting regulatory element involved in the MeJA-responsiveness	MeJA-responsiveness
BnGRP17-Ann	BnaAnng13740D	TGACG-motif	TGACG	312	5	+	Hordeum vulgare	cis-acting regulatory element involved in the MeJA-responsiveness	MeJA-responsiveness
BnGRP17-Ann	BnaAnng13740D	MRE	AACCTAA	330	7	+	Petroselinum crispum	MYB binding site involved in light responsiveness	MYB binding site
BnGRP17-Ann	BnaAnng13740D	TATA-box	ATATAT	367	6	+	Brassica napus	core promoter element around -30 of transcription start	core promoter element transcription start
BnGRP17-Ann	BnaAnng13740D	TATA-box	TATA	368	4	+	Arabidopsis thaliana	core promoter element around -30 of transcription start	core promoter element transcription start
BnGRP17-Ann	BnaAnng13740D	TATA-box	TATAAAA	377	7	-	Pisum sativum	core promoter element around -30 of transcription start	core promoter element transcription start
BnGRP17-Ann	BnaAnng13740D	TATA-box	TATAAA	378	6	-	Helianthus annuus	core promoter element around -30 of transcription start	core promoter element transcription start
BnGRP17-Ann	BnaAnng13740D	TATA-box	TATAA	379	5	-	Arabidopsis thaliana	core promoter element around -30 of transcription start	core promoter element transcription start
BnGRP17-Ann	BnaAnng13740D	TATA-box	TATA	380	4	+	Arabidopsis thaliana	core promoter element around -30 of transcription start	core promoter element transcription start
BnGRP17-Ann	BnaAnng13740D	TATA-box	TATACA	389	6	-	Helianthus annuus	core promoter element around -30 of transcription start	core promoter element transcription start
BnGRP17-Ann	BnaAnng13740D	TATA-box	TATATA	391	6	+	Arabidopsis thaliana	core promoter element around -30 of transcription start	core promoter element transcription start
BnGRP17-Ann	BnaAnng13740D	TATA-box	ATATAT	392	6	+	Brassica napus	core promoter element around -30 of transcription start	core promoter element transcription start
BnGRP17-Ann	BnaAnng13740D	TATA-box	TATA	393	4	+	Arabidopsis thaliana	core promoter element around -30 of transcription start	core promoter element transcription start
BnGRP17-Ann	BnaAnng13740D	CAAT-box	CCAAT	406	5	-	Arabidopsis thaliana	common cis-acting element in promoter and enhancer regions	promoter and enhancer regions
BnGRP17-Ann	BnaAnng13740D	ARE	AAACCA	408	6	-	Zea mays	cis-acting regulatory element essential for the anaerobic induction	anaerobic induction
BnGRP17-Ann	BnaAnng13740D	P-box	CCTTTTG	440	7	+	Oryza sativa	gibberellin-responsive element	gibberellin-responsive
BnGRP17-Ann	BnaAnng13740D	CAAT-box	CCAAT	471	5	-	Arabidopsis thaliana	common cis-acting element in promoter and enhancer regions	promoter and enhancer regions
BnGRP17-Ann	BnaAnng13740D		motif_sequence	479	4	-	organism	short_function	short_function
BnGRP17-Ann	BnaAnng13740D	CAAT-box	CAAAT	521	5	-	Pisum sativum	common cis-acting element in promoter and enhancer regions	promoter and enhancer regions
BnGRP17-Ann	BnaAnng13740D	ARE	AAACCA	527	6	-	Zea mays	cis-acting regulatory element essential for the anaerobic induction	anaerobic induction
BnGRP17-Ann	BnaAnng13740D		motif_sequence	556	4	+	organism	short_function	short_function
BnGRP17-Ann	BnaAnng13740D		motif_sequence	676	4	+	organism	short_function	short_function
BnGRP17-Ann	BnaAnng13740D		motif_sequence	685	4	-	organism	short_function	short_function
BnGRP17-Ann	BnaAnng13740D		motif_sequence	701	4	+	organism	short_function	short_function
BnGRP17-Ann	BnaAnng13740D	MBS	CAACTG	721	6	-	Arabidopsis thaliana	MYB binding site involved in drought-inducibility	MYB binding site
BnGRP17-Ann	BnaAnng13740D	TATA-box	ATTATA	754	6	+	Brassica napus	core promoter element around -30 of transcription start	core promoter element transcription start
BnGRP17-Ann	BnaAnng13740D	TATA-box	TATATAA	755	7	-	Arabidopsis thaliana	core promoter element around -30 of transcription start	core promoter element transcription start
BnGRP17-Ann	BnaAnng13740D	TATA-box	TATATA	756	6	+	Arabidopsis thaliana	core promoter element around -30 of transcription start	core promoter element transcription start
BnGRP17-Ann	BnaAnng13740D	TATA-box	TATA	758	4	+	Arabidopsis thaliana	core promoter element around -30 of transcription start	core promoter element transcription start
BnGRP17-Ann	BnaAnng13740D	WUN-motif	AAATTTCCT	761	9	-	Brassica oleracea	wound-responsive element	wound-responsive element
BnGRP17-Ann	BnaAnng13740D	TCA-element	TCAGAAGAGG	793	9	+	Brassica oleracea	cis-acting element involved in salicylic acid responsiveness	salicylic acid responsiveness
BnGRP17-Ann	BnaAnng13740D		motif_sequence	796	4	-	organism	short_function	short_function
BnGRP17-Ann	BnaAnng13740D	CAT-box	GCCACT	800	6	-	Arabidopsis thaliana	cis-acting regulatory element related to meristem expression	meristem expression
BnGRP17-Ann	BnaAnng13740D		motif_sequence	827	4	-	organism	short_function	short_function
BnGRP17-Ann	BnaAnng13740D	TC-rich repeats	ATTCTCTAAC	869	9	-	Nicotiana tabacum	cis-acting element involved in defense and stress responsiveness	defense and stress responsiveness
BnGRP17-Ann	BnaAnng13740D	CAAT-box	CAAAT	922	5	+	Pisum sativum	common cis-acting element in promoter and enhancer regions	promoter and enhancer regions
BnGRP17-Ann	BnaAnng13740D	MRE	AACCTAA	956	7	-	Petroselinum crispum	MYB binding site involved in light responsiveness	MYB binding site
BnGRP17-Ann	BnaAnng13740D	TC-rich repeats	GTTTTCTTAC	960	9	+	Nicotiana tabacum	cis-acting element involved in defense and stress responsiveness	defense and stress responsiveness
BnGRP17-Ann	BnaAnng13740D	TCT-motif	TCTTAC	983	6	+	Arabidopsis thaliana	part of a light responsive element	light response
BnGRP17-Ann	BnaAnng13740D		motif_sequence	1063	4	-	organism	short_function	short_function
BnGRP17-Ann	BnaAnng13740D		motif_sequence	1271	4	+	organism	short_function	short_function
BnGRP17-Ann	BnaAnng13740D	TATA-box	TATTTAAA	1306	8	+	Arabidopsis thaliana	core promoter element around -30 of transcription start	core promoter element transcription start
BnGRP17-Ann	BnaAnng13740D		motif_sequence	1327	4	+	organism	short_function	short_function
BnGRP17-Ann	BnaAnng13740D	CAAT-box	CCAAT	1345	5	+	Arabidopsis thaliana	common cis-acting element in promoter and enhancer regions	promoter and enhancer regions
BnGRP17-Ann	BnaAnng13740D	TATA-box	ATATAT	1348	6	-	Brassica napus	core promoter element around -30 of transcription start	core promoter element transcription start
BnGRP17-Ann	BnaAnng13740D	TATA-box	TATATA	1349	6	-	Arabidopsis thaliana	core promoter element around -30 of transcription start	core promoter element transcription start
BnGRP17-Ann	BnaAnng13740D	TATA-box	ATATAT	1350	6	-	Brassica napus	core promoter element around -30 of transcription start	core promoter element transcription start
BnGRP17-Ann	BnaAnng13740D	TATA-box	TATA	1351	4	-	Arabidopsis thaliana	core promoter element around -30 of transcription start	core promoter element transcription start
BnGRP17-Ann	BnaAnng13740D		motif_sequence	1380	4	+	organism	short_function	short_function
BnGRP17-Ann	BnaAnng13740D		motif_sequence	1403	4	-	organism	short_function	short_function
BnGRP17-Ann	BnaAnng13740D	TATA-box	ATATAA	1407	6	+	Brassica oleracea	core promoter element around -30 of transcription start	core promoter element transcription start
BnGRP17-Ann	BnaAnng13740D	TATA-box	TATA	1408	4	-	Arabidopsis thaliana	core promoter element around -30 of transcription start	core promoter element transcription start
BnGRP17-Ann	BnaAnng13740D	CAAT-box	CAAAT	1417	5	+	Pisum sativum	common cis-acting element in promoter and enhancer regions	promoter and enhancer regions
BnGRP17-Ann	BnaAnng13740D	circadian	CAAAGATATC	1474	9	+	Lycopersicon esculentum	cis-acting regulatory element involved in circadian control	circadian control
BnGRP17-Ann	BnaAnng13740D	TCT-motif	TCTTAC	1489	6	+	Arabidopsis thaliana	part of a light responsive element	light response
BnGRP17-Ann	BnaAnng13740D	TATA-box	TATAA	1548	5	-	Arabidopsis thaliana	core promoter element around -30 of transcription start	core promoter element transcription start
BnGRP17-Ann	BnaAnng13740D	TATA-box	TATA	1549	4	-	Arabidopsis thaliana	core promoter element around -30 of transcription start	core promoter element transcription start
BnGRP17-Ann	BnaAnng13740D		motif_sequence	1575	4	-	organism	short_function	short_function
BnGRP17-Ann	BnaAnng13740D	CAAT-box	CAAAT	1624	5	+	Pisum sativum	common cis-acting element in promoter and enhancer regions	promoter and enhancer regions
BnGRP17-Ann	BnaAnng13740D		motif_sequence	1685	4	+	organism	short_function	short_function
BnGRP17-Ann	BnaAnng13740D	TATA-box	ATATAA	1698	6	+	Brassica oleracea	core promoter element around -30 of transcription start	core promoter element transcription start
BnGRP17-Ann	BnaAnng13740D	TATA-box	TATA	1699	4	-	Arabidopsis thaliana	core promoter element around -30 of transcription start	core promoter element transcription start
BnGRP17-Ann	BnaAnng13740D	TATA-box	ccTATAAAaa	1738	9	+	Arabidopsis thaliana	core promoter element around -30 of transcription start	core promoter element transcription start
BnGRP17-Ann	BnaAnng13740D	TATA-box	ATATAA	1739	6	+	Brassica oleracea	core promoter element around -30 of transcription start	core promoter element transcription start
BnGRP17-Ann	BnaAnng13740D	TATA-box	TATA	1740	4	-	Arabidopsis thaliana	core promoter element around -30 of transcription start	core promoter element transcription start
BnGRP17-Ann	BnaAnng13740D	AE-box	AGAAACAA	1791	8	+	Arabidopsis thaliana	part of a module for light response	light response
BnGRP17-Ann	BnaAnng13740D	TCT-motif	TCTTAC	1805	6	+	Arabidopsis thaliana	part of a light responsive element	light response
BnGRP17-Ann	BnaAnng13740D	CAAT-box	CAAAT	1848	5	+	Pisum sativum	common cis-acting element in promoter and enhancer regions	promoter and enhancer regions
BnGRP17-Ann	BnaAnng13740D	CGTCA-motif	CGTCA	1854	5	-	Hordeum vulgare	cis-acting regulatory element involved in the MeJA-responsiveness	MeJA-responsiveness
BnGRP17-Ann	BnaAnng13740D	TGACG-motif	TGACG	1854	5	+	Hordeum vulgare	cis-acting regulatory element involved in the MeJA-responsiveness	MeJA-responsiveness
BnGRP17-Ann	BnaAnng13740D	G-box	CACGTC	1855	6	-	Zea mays	cis-acting regulatory element involved in light responsiveness	light response
BnGRP17-Ann	BnaAnng13740D	ABRE	ACGTG	1856	5	+	Arabidopsis thaliana	cis-acting element involved in the abscisic acid responsiveness	abscisic acid responsiveness
BnGRP17-Ann	BnaAnng13740D	CGTCA-motif	CGTCA	1859	5	-	Hordeum vulgare	cis-acting regulatory element involved in the MeJA-responsiveness	MeJA-responsiveness
BnGRP17-Ann	BnaAnng13740D	TGACG-motif	TGACG	1859	5	+	Hordeum vulgare	cis-acting regulatory element involved in the MeJA-responsiveness	MeJA-responsiveness
BnGRP17-Ann	BnaAnng13740D	TGA-box	TGACGTAA	1859	8	+	Glycine max	part of an auxin-responsive element	auxin responsive
BnGRP17-Ann	BnaAnng13740D		motif_sequence	1868	4	-	organism	short_function	short_function
BnGRP17-Ann	BnaAnng13740D		motif_sequence	1872	4	+	organism	short_function	short_function
BnGRP17-Ann	BnaAnng13740D	CAAT-box	CCAAT	1885	5	+	Arabidopsis thaliana	common cis-acting element in promoter and enhancer regions	promoter and enhancer regions
BnGRP17-Ann	BnaAnng13740D	RY-element	CATGCATG	1904	8	-	Helianthus annuus	cis-acting regulatory element involved in seed-specific regulation	seed-specific regulation
BnGRP17-Ann	BnaAnng13740D	ABRE	ACGTG	1921	5	-	Arabidopsis thaliana	cis-acting element involved in the abscisic acid responsiveness	abscisic acid responsiveness
BnGRP17-Ann	BnaAnng13740D	G-box	CACGTT	1921	6	+	Pisum sativum	cis-acting regulatory element involved in light responsiveness	light response
BnGRP17-Ann	BnaAnng13740D	TATA-box	TATAA	1925	5	-	Arabidopsis thaliana	core promoter element around -30 of transcription start	core promoter element transcription start
BnGRP17-Ann	BnaAnng13740D	TATA-box	TATA	1926	4	-	Arabidopsis thaliana	core promoter element around -30 of transcription start	core promoter element transcription start
BnGRP17-Ann	BnaAnng13740D	CAAT-box	CCAAT	1987	5	+	Arabidopsis thaliana	common cis-acting element in promoter and enhancer regions	promoter and enhancer regions
BnGRP14-C02	BnaC02g01570D		motif_sequence	8	4	+	organism	short_function	short_function
BnGRP14-C02	BnaC02g01570D		motif_sequence	26	4	+	organism	short_function	short_function
BnGRP14-C02	BnaC02g01570D	CAAT-box	CAAAT	33	5	-	Pisum sativum	common cis-acting element in promoter and enhancer regions	promoter and enhancer regions
BnGRP14-C02	BnaC02g01570D	CAAT-box	CAAAT	44	5	+	Pisum sativum	common cis-acting element in promoter and enhancer regions	promoter and enhancer regions
BnGRP14-C02	BnaC02g01570D		motif_sequence	52	4	+	organism	short_function	short_function
BnGRP14-C02	BnaC02g01570D		motif_sequence	56	4	-	organism	short_function	short_function
BnGRP14-C02	BnaC02g01570D		motif_sequence	81	4	+	organism	short_function	short_function
BnGRP14-C02	BnaC02g01570D	MBS	CAACTG	128	6	-	Arabidopsis thaliana	MYB binding site involved in drought-inducibility	MYB binding site
BnGRP14-C02	BnaC02g01570D	TATA-box	TATA	151	4	+	Arabidopsis thaliana	core promoter element around -30 of transcription start	core promoter element transcription start
BnGRP14-C02	BnaC02g01570D	TATA-box	ccTATAAAaa	160	9	-	Arabidopsis thaliana	core promoter element around -30 of transcription start	core promoter element transcription start
BnGRP14-C02	BnaC02g01570D	TATA-box	TATATAA	161	7	-	Arabidopsis thaliana	core promoter element around -30 of transcription start	core promoter element transcription start
BnGRP14-C02	BnaC02g01570D	TATA-box	TATATA	162	6	+	Arabidopsis thaliana	core promoter element around -30 of transcription start	core promoter element transcription start
BnGRP14-C02	BnaC02g01570D	TATA-box	TATA	164	4	+	Arabidopsis thaliana	core promoter element around -30 of transcription start	core promoter element transcription start
BnGRP14-C02	BnaC02g01570D	WUN-motif	AAATTTCCT	167	9	-	Brassica oleracea	wound-responsive element	wound-responsive element
BnGRP14-C02	BnaC02g01570D		motif_sequence	233	4	-	organism	short_function	short_function
BnGRP14-C02	BnaC02g01570D	TC-rich repeats	ATTCTCTAAC	295	9	-	Nicotiana tabacum	cis-acting element involved in defense and stress responsiveness	defense and stress responsiveness
BnGRP14-C02	BnaC02g01570D		motif_sequence	374	4	+	organism	short_function	short_function
BnGRP14-C02	BnaC02g01570D	G-box	CACGTT	438	6	-	Pisum sativum	cis-acting regulatory element involved in light responsiveness	light response
BnGRP14-C02	BnaC02g01570D	ABRE	ACGTG	439	5	+	Arabidopsis thaliana	cis-acting element involved in the abscisic acid responsiveness	abscisic acid responsiveness
BnGRP14-C02	BnaC02g01570D		motif_sequence	451	4	-	organism	short_function	short_function
BnGRP14-C02	BnaC02g01570D		motif_sequence	685	4	+	organism	short_function	short_function
BnGRP14-C02	BnaC02g01570D	TATA-box	TATTTAAA	720	8	+	Arabidopsis thaliana	core promoter element around -30 of transcription start	core promoter element transcription start
BnGRP14-C02	BnaC02g01570D		motif_sequence	741	4	+	organism	short_function	short_function
BnGRP14-C02	BnaC02g01570D	CAAT-box	CCAAT	759	5	+	Arabidopsis thaliana	common cis-acting element in promoter and enhancer regions	promoter and enhancer regions
BnGRP14-C02	BnaC02g01570D	TATA-box	ATATAT	762	6	+	Brassica napus	core promoter element around -30 of transcription start	core promoter element transcription start
BnGRP14-C02	BnaC02g01570D	TATA-box	TATATA	763	6	+	Arabidopsis thaliana	core promoter element around -30 of transcription start	core promoter element transcription start
BnGRP14-C02	BnaC02g01570D	TATA-box	ATATAT	764	6	+	Brassica napus	core promoter element around -30 of transcription start	core promoter element transcription start
BnGRP14-C02	BnaC02g01570D	TATA-box	TATA	765	4	+	Arabidopsis thaliana	core promoter element around -30 of transcription start	core promoter element transcription start
BnGRP14-C02	BnaC02g01570D	TATA-box	ccTATAAAaa	780	9	-	Arabidopsis thaliana	core promoter element around -30 of transcription start	core promoter element transcription start
BnGRP14-C02	BnaC02g01570D		motif_sequence	794	4	+	organism	short_function	short_function
BnGRP14-C02	BnaC02g01570D		motif_sequence	817	4	-	organism	short_function	short_function
BnGRP14-C02	BnaC02g01570D	TATA-box	ATATAA	821	6	+	Brassica oleracea	core promoter element around -30 of transcription start	core promoter element transcription start
BnGRP14-C02	BnaC02g01570D	TATA-box	TATA	822	4	+	Arabidopsis thaliana	core promoter element around -30 of transcription start	core promoter element transcription start
BnGRP14-C02	BnaC02g01570D	CAAT-box	CAAAT	831	5	+	Pisum sativum	common cis-acting element in promoter and enhancer regions	promoter and enhancer regions
BnGRP14-C02	BnaC02g01570D		motif_sequence	852	4	+	organism	short_function	short_function
BnGRP14-C02	BnaC02g01570D	circadian	CAAAGATATC	888	9	+	Lycopersicon esculentum	cis-acting regulatory element involved in circadian control	circadian control
BnGRP14-C02	BnaC02g01570D	TCT-motif	TCTTAC	903	6	+	Arabidopsis thaliana	part of a light responsive element	light response
BnGRP14-C02	BnaC02g01570D	ABRE	AACCCGG	925	7	+	Arabidopsis thaliana	cis-acting element involved in the abscisic acid responsiveness	abscisic acid responsiveness
BnGRP14-C02	BnaC02g01570D	LTR	CCGAAA	983	6	+	Hordeum vulgare	cis-acting element involved in low-temperature responsiveness	low-temperature responsiveness
BnGRP14-C02	BnaC02g01570D	LTR	CCGAAA	1034	6	+	Hordeum vulgare	cis-acting element involved in low-temperature responsiveness	low-temperature responsiveness
BnGRP14-C02	BnaC02g01570D	TATA-box	ATATAA	1078	6	+	Brassica oleracea	core promoter element around -30 of transcription start	core promoter element transcription start
BnGRP14-C02	BnaC02g01570D	TATA-box	TATA	1079	4	-	Arabidopsis thaliana	core promoter element around -30 of transcription start	core promoter element transcription start
BnGRP14-C02	BnaC02g01570D	TATA-box	taTATAAAtc	1092	10	-	Arabidopsis thaliana	core promoter element around -30 of transcription start	core promoter element transcription start
BnGRP14-C02	BnaC02g01570D	TATA-box	TATAAAT	1093	7	-	Brassica juncea	core promoter element around -30 of transcription start	core promoter element transcription start
BnGRP14-C02	BnaC02g01570D	TATA-box	TATAAA	1094	6	-	Helianthus annuus	core promoter element around -30 of transcription start	core promoter element transcription start
BnGRP14-C02	BnaC02g01570D	TATA-box	TATATAA	1095	7	-	Arabidopsis thaliana	core promoter element around -30 of transcription start	core promoter element transcription start
BnGRP14-C02	BnaC02g01570D	TATA-box	TATATA	1096	6	-	Arabidopsis thaliana	core promoter element around -30 of transcription start	core promoter element transcription start
BnGRP14-C02	BnaC02g01570D	TATA-box	TATA	1098	4	-	Arabidopsis thaliana	core promoter element around -30 of transcription start	core promoter element transcription start
BnGRP14-C02	BnaC02g01570D	TATA-box	ATATAT	1107	6	-	Brassica napus	core promoter element around -30 of transcription start	core promoter element transcription start
BnGRP14-C02	BnaC02g01570D	TATA-box	TATA	1108	4	-	Arabidopsis thaliana	core promoter element around -30 of transcription start	core promoter element transcription start
BnGRP14-C02	BnaC02g01570D	TATA-box	TATACA	1132	6	-	Helianthus annuus	core promoter element around -30 of transcription start	core promoter element transcription start
BnGRP14-C02	BnaC02g01570D	TATA-box	TATA	1134	4	-	Arabidopsis thaliana	core promoter element around -30 of transcription start	core promoter element transcription start
BnGRP14-C02	BnaC02g01570D	TATA-box	ATATAT	1153	6	-	Brassica napus	core promoter element around -30 of transcription start	core promoter element transcription start
BnGRP14-C02	BnaC02g01570D	TATA-box	TATATA	1154	6	-	Arabidopsis thaliana	core promoter element around -30 of transcription start	core promoter element transcription start
BnGRP14-C02	BnaC02g01570D	TATA-box	ATATAA	1155	6	+	Brassica oleracea	core promoter element around -30 of transcription start	core promoter element transcription start
BnGRP14-C02	BnaC02g01570D	TATA-box	TATA	1156	4	-	Arabidopsis thaliana	core promoter element around -30 of transcription start	core promoter element transcription start
BnGRP14-C02	BnaC02g01570D	G-box	TACGTG	1183	6	+	Arabidopsis thaliana	cis-acting regulatory element involved in light responsiveness	light response
BnGRP14-C02	BnaC02g01570D	ABRE	ACGTG	1184	5	+	Arabidopsis thaliana	cis-acting element involved in the abscisic acid responsiveness	abscisic acid responsiveness
BnGRP14-C02	BnaC02g01570D	TATA-box	TATA	1193	4	-	Arabidopsis thaliana	core promoter element around -30 of transcription start	core promoter element transcription start
BnGRP14-C02	BnaC02g01570D	TATA-box	TACATAAA	1195	8	+	Oryza sativa	core promoter element around -30 of transcription start	core promoter element transcription start
BnGRP14-C02	BnaC02g01570D	TATA-box	ATATAT	1234	6	-	Brassica napus	core promoter element around -30 of transcription start	core promoter element transcription start
BnGRP14-C02	BnaC02g01570D	TATA-box	TATA	1235	4	-	Arabidopsis thaliana	core promoter element around -30 of transcription start	core promoter element transcription start
BnGRP14-C02	BnaC02g01570D	CAAT-box	CAAAT	1281	5	+	Pisum sativum	common cis-acting element in promoter and enhancer regions	promoter and enhancer regions
BnGRP14-C02	BnaC02g01570D	TATA-box	TATTTAAA	1285	8	+	Arabidopsis thaliana	core promoter element around -30 of transcription start	core promoter element transcription start
BnGRP14-C02	BnaC02g01570D	ARE	AAACCA	1295	6	+	Zea mays	cis-acting regulatory element essential for the anaerobic induction	anaerobic induction
BnGRP14-C02	BnaC02g01570D	CAAT-box	CCAAT	1298	5	+	Arabidopsis thaliana	common cis-acting element in promoter and enhancer regions	promoter and enhancer regions
BnGRP14-C02	BnaC02g01570D	TATA-box	TATAAAT	1301	7	-	Brassica juncea	core promoter element around -30 of transcription start	core promoter element transcription start
BnGRP14-C02	BnaC02g01570D	TATA-box	TATAAA	1302	6	-	Helianthus annuus	core promoter element around -30 of transcription start	core promoter element transcription start
BnGRP14-C02	BnaC02g01570D	TATA-box	TATAA	1303	5	-	Arabidopsis thaliana	core promoter element around -30 of transcription start	core promoter element transcription start
BnGRP14-C02	BnaC02g01570D	TATA-box	TATA	1304	4	-	Arabidopsis thaliana	core promoter element around -30 of transcription start	core promoter element transcription start
BnGRP14-C02	BnaC02g01570D	TATA-box	ATATAT	1330	6	-	Brassica napus	core promoter element around -30 of transcription start	core promoter element transcription start
BnGRP14-C02	BnaC02g01570D	TATA-box	TATA	1331	4	-	Arabidopsis thaliana	core promoter element around -30 of transcription start	core promoter element transcription start
BnGRP14-C02	BnaC02g01570D	TATA-box	ATTATA	1334	6	+	Brassica napus	core promoter element around -30 of transcription start	core promoter element transcription start
BnGRP14-C02	BnaC02g01570D	TATA-box	TATAA	1335	5	-	Arabidopsis thaliana	core promoter element around -30 of transcription start	core promoter element transcription start
BnGRP14-C02	BnaC02g01570D	TATA-box	TATA	1336	4	-	Arabidopsis thaliana	core promoter element around -30 of transcription start	core promoter element transcription start
BnGRP14-C02	BnaC02g01570D	CAAT-box	CAAAT	1340	5	+	Pisum sativum	common cis-acting element in promoter and enhancer regions	promoter and enhancer regions
BnGRP14-C02	BnaC02g01570D	TATA-box	TATAAAT	1343	7	-	Brassica juncea	core promoter element around -30 of transcription start	core promoter element transcription start
BnGRP14-C02	BnaC02g01570D	TATA-box	TATAAA	1344	6	-	Helianthus annuus	core promoter element around -30 of transcription start	core promoter element transcription start
BnGRP14-C02	BnaC02g01570D	TATA-box	TATAA	1345	5	-	Arabidopsis thaliana	core promoter element around -30 of transcription start	core promoter element transcription start
BnGRP14-C02	BnaC02g01570D	TATA-box	TATA	1346	4	-	Arabidopsis thaliana	core promoter element around -30 of transcription start	core promoter element transcription start
BnGRP14-C02	BnaC02g01570D	TATA-box	ATATAT	1354	6	-	Brassica napus	core promoter element around -30 of transcription start	core promoter element transcription start
BnGRP14-C02	BnaC02g01570D	TATA-box	TATA	1355	4	-	Arabidopsis thaliana	core promoter element around -30 of transcription start	core promoter element transcription start
BnGRP14-C02	BnaC02g01570D	TATA-box	TATAAAA	1367	7	-	Pisum sativum	core promoter element around -30 of transcription start	core promoter element transcription start
BnGRP14-C02	BnaC02g01570D	TATA-box	TATAAA	1368	6	-	Helianthus annuus	core promoter element around -30 of transcription start	core promoter element transcription start
BnGRP14-C02	BnaC02g01570D	TATA-box	TATAA	1369	5	-	Arabidopsis thaliana	core promoter element around -30 of transcription start	core promoter element transcription start
BnGRP14-C02	BnaC02g01570D	TATA-box	TATA	1370	4	-	Arabidopsis thaliana	core promoter element around -30 of transcription start	core promoter element transcription start
BnGRP14-C02	BnaC02g01570D	TATA-box	ATATAA	1394	6	+	Brassica oleracea	core promoter element around -30 of transcription start	core promoter element transcription start
BnGRP14-C02	BnaC02g01570D	TATA-box	TATA	1395	4	-	Arabidopsis thaliana	core promoter element around -30 of transcription start	core promoter element transcription start
BnGRP14-C02	BnaC02g01570D	chs-Unit 1 m1	ACCTAACCCGC	1447	10	+	Hordeum vulgare	part of a light responsive element	light response
BnGRP14-C02	BnaC02g01570D	TATA-box	TAAAGATT	1511	8	-	Arabidopsis thaliana	core promoter element around -30 of transcription start	core promoter element transcription start
BnGRP14-C02	BnaC02g01570D	LTR	CCGAAA	1522	6	+	Hordeum vulgare	cis-acting element involved in low-temperature responsiveness	low-temperature responsiveness
BnGRP14-C02	BnaC02g01570D	LTR	CCGAAA	1530	6	+	Hordeum vulgare	cis-acting element involved in low-temperature responsiveness	low-temperature responsiveness
BnGRP14-C02	BnaC02g01570D	TCT-motif	TCTTAC	1588	6	+	Arabidopsis thaliana	part of a light responsive element	light response
BnGRP14-C02	BnaC02g01570D	MBSI	aaaAaaC(G/C)GTTA	1590	10.5	-	Petunia hybrida	MYB binding site involved in flavonoid biosynthetic genes regulation	MYB binding site
BnGRP14-C02	BnaC02g01570D	TATA-box	TATAA	1642	5	-	Arabidopsis thaliana	core promoter element around -30 of transcription start	core promoter element transcription start
BnGRP14-C02	BnaC02g01570D	TATA-box	TATA	1643	4	-	Arabidopsis thaliana	core promoter element around -30 of transcription start	core promoter element transcription start
BnGRP14-C02	BnaC02g01570D	ABRE	CACGTG	1670	6	-	Arabidopsis thaliana	cis-acting element involved in the abscisic acid responsiveness	abscisic acid responsiveness
BnGRP14-C02	BnaC02g01570D	G-box	CACGTG	1670	6	-	Arabidopsis thaliana	cis-acting regulatory element involved in light responsiveness	light response
BnGRP14-C02	BnaC02g01570D	ABRE	ACGTG	1671	5	+	Arabidopsis thaliana	cis-acting element involved in the abscisic acid responsiveness	abscisic acid responsiveness
BnGRP14-C02	BnaC02g01570D	CAAT-box	CAAAT	1718	5	+	Pisum sativum	common cis-acting element in promoter and enhancer regions	promoter and enhancer regions
BnGRP14-C02	BnaC02g01570D		motif_sequence	1781	4	+	organism	short_function	short_function
BnGRP14-C02	BnaC02g01570D	TATA-box	ATATAA	1794	6	+	Brassica oleracea	core promoter element around -30 of transcription start	core promoter element transcription start
BnGRP14-C02	BnaC02g01570D	TATA-box	TATA	1795	4	-	Arabidopsis thaliana	core promoter element around -30 of transcription start	core promoter element transcription start
BnGRP14-C02	BnaC02g01570D	TATA-box	ccTATAAAaa	1834	9	+	Arabidopsis thaliana	core promoter element around -30 of transcription start	core promoter element transcription start
BnGRP14-C02	BnaC02g01570D	TATA-box	ATATAA	1835	6	+	Brassica oleracea	core promoter element around -30 of transcription start	core promoter element transcription start
BnGRP14-C02	BnaC02g01570D	TATA-box	TATA	1836	4	-	Arabidopsis thaliana	core promoter element around -30 of transcription start	core promoter element transcription start
BnGRP14-C02	BnaC02g01570D	AE-box	AGAAACAA	1887	8	+	Arabidopsis thaliana	part of a module for light response	light response
BnGRP14-C02	BnaC02g01570D	AE-box	AGAAACAA	1939	8	+	Arabidopsis thaliana	part of a module for light response	light response
BnGRP14-C02	BnaC02g01570D	CAAT-box	CAAAT	1944	5	+	Pisum sativum	common cis-acting element in promoter and enhancer regions	promoter and enhancer regions
BnGRP14-C02	BnaC02g01570D	CGTCA-motif	CGTCA	1950	5	-	Hordeum vulgare	cis-acting regulatory element involved in the MeJA-responsiveness	MeJA-responsiveness
BnGRP14-C02	BnaC02g01570D	TGACG-motif	TGACG	1950	5	+	Hordeum vulgare	cis-acting regulatory element involved in the MeJA-responsiveness	MeJA-responsiveness
BnGRP14-C02	BnaC02g01570D	G-box	CACGTC	1951	6	-	Zea mays	cis-acting regulatory element involved in light responsiveness	light response
BnGRP14-C02	BnaC02g01570D	ABRE	ACGTG	1952	5	+	Arabidopsis thaliana	cis-acting element involved in the abscisic acid responsiveness	abscisic acid responsiveness
BnGRP14-C02	BnaC02g01570D	CGTCA-motif	CGTCA	1955	5	-	Hordeum vulgare	cis-acting regulatory element involved in the MeJA-responsiveness	MeJA-responsiveness
BnGRP14-C02	BnaC02g01570D	TGACG-motif	TGACG	1955	5	+	Hordeum vulgare	cis-acting regulatory element involved in the MeJA-responsiveness	MeJA-responsiveness
BnGRP14-C02	BnaC02g01570D	TGA-box	TGACGTAA	1955	8	+	Glycine max	part of an auxin-responsive element	auxin responsive
BnGRP14-C02	BnaC02g01570D	G-box	CACGTT	1961	6	-	Pisum sativum	cis-acting regulatory element involved in light responsiveness	light response
BnGRP14-C02	BnaC02g01570D	ABRE	ACGTG	1962	5	+	Arabidopsis thaliana	cis-acting element involved in the abscisic acid responsiveness	abscisic acid responsiveness
BnGRP14-C02	BnaC02g01570D		motif_sequence	1968	4	+	organism	short_function	short_function
BnGRP14-C02	BnaC02g01570D	CAAT-box	CCAAT	1981	5	+	Arabidopsis thaliana	common cis-acting element in promoter and enhancer regions	promoter and enhancer regions
BnGRP17-A03	BnaA03g02100D	TCA-element	CCATCTTTTT	29	9	+	Nicotiana tabacum	cis-acting element involved in salicylic acid responsiveness	salicylic acid responsiveness
BnGRP17-A03	BnaA03g02100D	GARE-motif	TCTGTTG	43	7	+	Brassica oleracea	gibberellin-responsive element	gibberellin-responsive
BnGRP17-A03	BnaA03g02100D	GT1-motif	GGTTAAT	87	7	+	Avena sativa	light responsive element	light response
BnGRP17-A03	BnaA03g02100D	TATA-box	TATA	97	4	+	Arabidopsis thaliana	core promoter element around -30 of transcription start	core promoter element transcription start
BnGRP17-A03	BnaA03g02100D		motif_sequence	161	4	-	organism	short_function	short_function
BnGRP17-A03	BnaA03g02100D		motif_sequence	168	4	-	organism	short_function	short_function
BnGRP17-A03	BnaA03g02100D	G-box	TACGTG	258	6	-	Arabidopsis thaliana	cis-acting regulatory element involved in light responsiveness	light response
BnGRP17-A03	BnaA03g02100D	ABRE	ACGTG	258	5	-	Arabidopsis thaliana	cis-acting element involved in the abscisic acid responsiveness	abscisic acid responsiveness
BnGRP17-A03	BnaA03g02100D	TATA-box	ATATAA	306	6	+	Brassica oleracea	core promoter element around -30 of transcription start	core promoter element transcription start
BnGRP17-A03	BnaA03g02100D	TATA-box	TATA	307	4	+	Arabidopsis thaliana	core promoter element around -30 of transcription start	core promoter element transcription start
BnGRP17-A03	BnaA03g02100D	CAAT-box	CCAAT	380	5	-	Arabidopsis thaliana	common cis-acting element in promoter and enhancer regions	promoter and enhancer regions
BnGRP17-A03	BnaA03g02100D	AuxRR-core	GGTCCAT	383	7	+	Nicotiana tabacum	cis-acting regulatory element involved in auxin responsiveness	auxin responsive
BnGRP17-A03	BnaA03g02100D	ACE	CTAACGTATT	406	9	-	Petroselinum crispum	cis-acting element involved in light responsiveness	light response
BnGRP17-A03	BnaA03g02100D	TATA-box	TATACA	415	6	-	Helianthus annuus	core promoter element around -30 of transcription start	core promoter element transcription start
BnGRP17-A03	BnaA03g02100D	TATA-box	TATA	417	4	+	Arabidopsis thaliana	core promoter element around -30 of transcription start	core promoter element transcription start
BnGRP17-A03	BnaA03g02100D	TATA-box	ccTATAAAaa	440	9	+	Arabidopsis thaliana	core promoter element around -30 of transcription start	core promoter element transcription start
BnGRP17-A03	BnaA03g02100D	TATA-box	TATA	442	4	+	Arabidopsis thaliana	core promoter element around -30 of transcription start	core promoter element transcription start
BnGRP17-A03	BnaA03g02100D	TATA-box	TATA	538	4	+	Arabidopsis thaliana	core promoter element around -30 of transcription start	core promoter element transcription start
BnGRP17-A03	BnaA03g02100D	GT1-motif	GGTTAA	562	6	-	Arabidopsis thaliana	light responsive element	light response
BnGRP17-A03	BnaA03g02100D		motif_sequence	583	4	-	organism	short_function	short_function
BnGRP17-A03	BnaA03g02100D	CAAT-box	CAAAT	587	5	-	Pisum sativum	common cis-acting element in promoter and enhancer regions	promoter and enhancer regions
BnGRP17-A03	BnaA03g02100D	TATA-box	ATTATA	617	6	+	Brassica napus	core promoter element around -30 of transcription start	core promoter element transcription start
BnGRP17-A03	BnaA03g02100D	TATA-box	TATAA	618	5	-	Arabidopsis thaliana	core promoter element around -30 of transcription start	core promoter element transcription start
BnGRP17-A03	BnaA03g02100D	TATA-box	TATA	619	4	+	Arabidopsis thaliana	core promoter element around -30 of transcription start	core promoter element transcription start
BnGRP17-A03	BnaA03g02100D	AE-box	AGAAACTT	630	8	-	Arabidopsis thaliana	part of a module for light response	light response
BnGRP17-A03	BnaA03g02100D		motif_sequence	657	4	-	organism	short_function	short_function
BnGRP17-A03	BnaA03g02100D	CAAT-box	CAAAT	665	5	-	Pisum sativum	common cis-acting element in promoter and enhancer regions	promoter and enhancer regions
BnGRP17-A03	BnaA03g02100D	CAAT-box	CCAAT	673	5	+	Arabidopsis thaliana	common cis-acting element in promoter and enhancer regions	promoter and enhancer regions
BnGRP17-A03	BnaA03g02100D	CAAT-box	CAAAT	714	5	+	Pisum sativum	common cis-acting element in promoter and enhancer regions	promoter and enhancer regions
BnGRP17-A03	BnaA03g02100D		motif_sequence	724	4	-	organism	short_function	short_function
BnGRP17-A03	BnaA03g02100D		motif_sequence	744	4	-	organism	short_function	short_function
BnGRP17-A03	BnaA03g02100D	TCA-element	TCAGAAGAGG	813	9	-	Brassica oleracea	cis-acting element involved in salicylic acid responsiveness	salicylic acid responsiveness
BnGRP17-A03	BnaA03g02100D	TATA-box	TATA	860	4	+	Arabidopsis thaliana	core promoter element around -30 of transcription start	core promoter element transcription start
BnGRP17-A03	BnaA03g02100D	CAAT-box	CCAAT	1044	5	+	Arabidopsis thaliana	common cis-acting element in promoter and enhancer regions	promoter and enhancer regions
BnGRP17-A03	BnaA03g02100D	Box 4	ATTAAT	1097	6	-	Petroselinum crispum	part of a conserved DNA module involved in light responsiveness	light response
BnGRP17-A03	BnaA03g02100D	CAAT-box	CAAAT	1124	5	+	Pisum sativum	common cis-acting element in promoter and enhancer regions	promoter and enhancer regions
BnGRP17-A03	BnaA03g02100D	O2-site	GATGACATGG	1187	9	-	Zea mays	cis-acting regulatory element involved in zein metabolism regulation	zein metabolism regulation
BnGRP17-A03	BnaA03g02100D		motif_sequence	1189	4	+	organism	short_function	short_function
BnGRP17-A03	BnaA03g02100D		motif_sequence	1194	4	+	organism	short_function	short_function
BnGRP17-A03	BnaA03g02100D	G-box	TACGTG	1259	6	-	Arabidopsis thaliana	cis-acting regulatory element involved in light responsiveness	light response
BnGRP17-A03	BnaA03g02100D	ABRE	ACGTG	1259	5	-	Arabidopsis thaliana	cis-acting element involved in the abscisic acid responsiveness	abscisic acid responsiveness
BnGRP17-A03	BnaA03g02100D	GCN4_motif	TGAGTCA	1289	7	-	Oryza sativa	cis-regulatory element involved in endosperm expression	endosperm expression
BnGRP17-A03	BnaA03g02100D		motif_sequence	1348	4	+	organism	short_function	short_function
BnGRP17-A03	BnaA03g02100D	TATA-box	TATAA	1407	5	-	Arabidopsis thaliana	core promoter element around -30 of transcription start	core promoter element transcription start
BnGRP17-A03	BnaA03g02100D	TATA-box	TATA	1408	4	-	Arabidopsis thaliana	core promoter element around -30 of transcription start	core promoter element transcription start
BnGRP17-A03	BnaA03g02100D	CAAT-box	CAAAT	1438	5	+	Pisum sativum	common cis-acting element in promoter and enhancer regions	promoter and enhancer regions
BnGRP17-A03	BnaA03g02100D		motif_sequence	1472	4	-	organism	short_function	short_function
BnGRP17-A03	BnaA03g02100D	TATA-box	ATATAA	1488	6	+	Brassica oleracea	core promoter element around -30 of transcription start	core promoter element transcription start
BnGRP17-A03	BnaA03g02100D	TATA-box	TATA	1489	4	-	Arabidopsis thaliana	core promoter element around -30 of transcription start	core promoter element transcription start
BnGRP17-A03	BnaA03g02100D		motif_sequence	1540	4	-	organism	short_function	short_function
BnGRP17-A03	BnaA03g02100D	TATA-box	TACAAAA	1556	7	-	Oryza sativa	core promoter element around -30 of transcription start	core promoter element transcription start
BnGRP17-A03	BnaA03g02100D	TATA-box	TATACA	1559	6	-	Helianthus annuus	core promoter element around -30 of transcription start	core promoter element transcription start
BnGRP17-A03	BnaA03g02100D	TATA-box	TATA	1561	4	-	Arabidopsis thaliana	core promoter element around -30 of transcription start	core promoter element transcription start
BnGRP17-A03	BnaA03g02100D	TATA-box	ATTATA	1584	6	+	Brassica napus	core promoter element around -30 of transcription start	core promoter element transcription start
BnGRP17-A03	BnaA03g02100D	TATA-box	TATATAA	1585	7	-	Arabidopsis thaliana	core promoter element around -30 of transcription start	core promoter element transcription start
BnGRP17-A03	BnaA03g02100D	TATA-box	TATATA	1586	6	-	Arabidopsis thaliana	core promoter element around -30 of transcription start	core promoter element transcription start
BnGRP17-A03	BnaA03g02100D	TATA-box	ATATAT	1587	6	-	Brassica napus	core promoter element around -30 of transcription start	core promoter element transcription start
BnGRP17-A03	BnaA03g02100D	TATA-box	TATA	1588	4	-	Arabidopsis thaliana	core promoter element around -30 of transcription start	core promoter element transcription start
BnGRP17-A03	BnaA03g02100D	AE-box	AGAAACAA	1617	8	+	Arabidopsis thaliana	part of a module for light response	light response
BnGRP17-A03	BnaA03g02100D	CCAAT-box	CAACGG	1639	6	+	Hordeum vulgare	MYBHv1 binding site	MYBHv1 binding site
BnGRP17-A03	BnaA03g02100D	ARE	AAACCA	1687	6	-	Zea mays	cis-acting regulatory element essential for the anaerobic induction	anaerobic induction
BnGRP17-A03	BnaA03g02100D	ARE	AAACCA	1709	6	-	Zea mays	cis-acting regulatory element essential for the anaerobic induction	anaerobic induction
BnGRP17-A03	BnaA03g02100D	CAAT-box	CCAAT	1724	5	+	Arabidopsis thaliana	common cis-acting element in promoter and enhancer regions	promoter and enhancer regions
BnGRP17-A03	BnaA03g02100D	ARE	AAACCA	1746	6	+	Zea mays	cis-acting regulatory element essential for the anaerobic induction	anaerobic induction
BnGRP17-A03	BnaA03g02100D	TATA-box	TATA	1758	4	-	Arabidopsis thaliana	core promoter element around -30 of transcription start	core promoter element transcription start
BnGRP17-A03	BnaA03g02100D	AT-rich element	ATAGAAATCAA	1759	10	+	Glycine max	binding site of AT-rich DNA binding protein (ATBP-1)	AT-rich DNA binding protein (ATBP-1)
BnGRP17-A03	BnaA03g02100D	CGTCA-motif	CGTCA	1820	5	-	Hordeum vulgare	cis-acting regulatory element involved in the MeJA-responsiveness	MeJA-responsiveness
BnGRP17-A03	BnaA03g02100D	TGACG-motif	TGACG	1820	5	+	Hordeum vulgare	cis-acting regulatory element involved in the MeJA-responsiveness	MeJA-responsiveness
BnGRP17-A03	BnaA03g02100D	G-box	CACGTC	1821	6	-	Zea mays	cis-acting regulatory element involved in light responsiveness	light response
BnGRP17-A03	BnaA03g02100D	ABRE	ACGTG	1822	5	+	Arabidopsis thaliana	cis-acting element involved in the abscisic acid responsiveness	abscisic acid responsiveness
BnGRP17-A03	BnaA03g02100D	TATA-box	ATATAT	1834	6	-	Brassica napus	core promoter element around -30 of transcription start	core promoter element transcription start
BnGRP17-A03	BnaA03g02100D	TATA-box	TATATA	1835	6	-	Arabidopsis thaliana	core promoter element around -30 of transcription start	core promoter element transcription start
BnGRP17-A03	BnaA03g02100D	TATA-box	TATA	1837	4	-	Arabidopsis thaliana	core promoter element around -30 of transcription start	core promoter element transcription start
BnGRP17-A03	BnaA03g02100D	TGA-element	AACGAC	1846	6	-	Brassica oleracea	auxin-responsive element	auxin responsive
BnGRP17-A03	BnaA03g02100D	ABRE	ACGTG	1872	5	-	Arabidopsis thaliana	cis-acting element involved in the abscisic acid responsiveness	abscisic acid responsiveness
BnGRP17-A03	BnaA03g02100D	G-box	CACGTC	1872	6	+	Zea mays	cis-acting regulatory element involved in light responsiveness	light response
BnGRP17-A03	BnaA03g02100D		motif_sequence	1911	4	+	organism	short_function	short_function
BnGRP17-A03	BnaA03g02100D	ARE	AAACCA	1925	6	+	Zea mays	cis-acting regulatory element essential for the anaerobic induction	anaerobic induction
BnGRP14-A03	BnaA03g02110D	TATA-box	TATAA	1	5	-	Arabidopsis thaliana	core promoter element around -30 of transcription start	core promoter element transcription start
BnGRP14-A03	BnaA03g02110D	TATA-box	TATA	2	4	+	Arabidopsis thaliana	core promoter element around -30 of transcription start	core promoter element transcription start
BnGRP14-A03	BnaA03g02110D	TATA-box	TATA	14	4	+	Arabidopsis thaliana	core promoter element around -30 of transcription start	core promoter element transcription start
BnGRP14-A03	BnaA03g02110D	TATA-box	ATATAT	19	6	+	Brassica napus	core promoter element around -30 of transcription start	core promoter element transcription start
BnGRP14-A03	BnaA03g02110D	TATA-box	TATA	20	4	+	Arabidopsis thaliana	core promoter element around -30 of transcription start	core promoter element transcription start
BnGRP14-A03	BnaA03g02110D	ABRE	ACGTG	65	5	-	Arabidopsis thaliana	cis-acting element involved in the abscisic acid responsiveness	abscisic acid responsiveness
BnGRP14-A03	BnaA03g02110D	G-box	CACGTT	65	6	+	Pisum sativum	cis-acting regulatory element involved in light responsiveness	light response
BnGRP14-A03	BnaA03g02110D	chs-CMA1a	TTACTTAA	92	8	-	Daucus carota	part of a light responsive element	light response
BnGRP14-A03	BnaA03g02110D	ARE	AAACCA	106	6	+	Zea mays	cis-acting regulatory element essential for the anaerobic induction	anaerobic induction
BnGRP14-A03	BnaA03g02110D	CAAT-box	CCAAT	109	5	+	Arabidopsis thaliana	common cis-acting element in promoter and enhancer regions	promoter and enhancer regions
BnGRP14-A03	BnaA03g02110D	G-box	CACGAC	153	6	-	Zea mays	cis-acting regulatory element involved in light responsiveness	light response
BnGRP14-A03	BnaA03g02110D	G-box	CACGAC	162	6	-	Zea mays	cis-acting regulatory element involved in light responsiveness	light response
BnGRP14-A03	BnaA03g02110D	CAAT-box	CAAAT	204	5	-	Pisum sativum	common cis-acting element in promoter and enhancer regions	promoter and enhancer regions
BnGRP14-A03	BnaA03g02110D	CAAT-box	CCAAT	216	5	-	Arabidopsis thaliana	common cis-acting element in promoter and enhancer regions	promoter and enhancer regions
BnGRP14-A03	BnaA03g02110D	ABRE	TACGGTC	221	7	+	Arabidopsis thaliana	cis-acting element involved in the abscisic acid responsiveness	abscisic acid responsiveness
BnGRP14-A03	BnaA03g02110D		motif_sequence	250	4	-	organism	short_function	short_function
BnGRP14-A03	BnaA03g02110D	MBS	CAACTG	278	6	+	Arabidopsis thaliana	MYB binding site involved in drought-inducibility	MYB binding site
BnGRP14-A03	BnaA03g02110D	GATA-motif	AAGGATAAGG	379	9	+	Solanum tuberosum	part of a light responsive element	light response
BnGRP14-A03	BnaA03g02110D	TATA-box	ATATAT	427	6	+	Brassica napus	core promoter element around -30 of transcription start	core promoter element transcription start
BnGRP14-A03	BnaA03g02110D	TATA-box	TATA	428	4	+	Arabidopsis thaliana	core promoter element around -30 of transcription start	core promoter element transcription start
BnGRP14-A03	BnaA03g02110D	ARE	AAACCA	477	6	+	Zea mays	cis-acting regulatory element essential for the anaerobic induction	anaerobic induction
BnGRP14-A03	BnaA03g02110D	Unnamed__1	GAATTTAATTAA	502	11	-	Glycine max	60K protein binding site	60K protein binding site
BnGRP14-A03	BnaA03g02110D		motif_sequence	536	4	+	organism	short_function	short_function
BnGRP14-A03	BnaA03g02110D	TATA-box	TATACA	548	6	-	Helianthus annuus	core promoter element around -30 of transcription start	core promoter element transcription start
BnGRP14-A03	BnaA03g02110D	TATA-box	TATA	550	4	+	Arabidopsis thaliana	core promoter element around -30 of transcription start	core promoter element transcription start
BnGRP14-A03	BnaA03g02110D		motif_sequence	576	4	+	organism	short_function	short_function
BnGRP14-A03	BnaA03g02110D	TATA-box	TATACA	592	6	-	Helianthus annuus	core promoter element around -30 of transcription start	core promoter element transcription start
BnGRP14-A03	BnaA03g02110D	TATA-box	TATA	594	4	+	Arabidopsis thaliana	core promoter element around -30 of transcription start	core promoter element transcription start
BnGRP14-A03	BnaA03g02110D	circadian	CAAAGATATC	615	9	-	Lycopersicon esculentum	cis-acting regulatory element involved in circadian control	circadian control
BnGRP14-A03	BnaA03g02110D	GCN4_motif	TGAGTCA	661	7	+	Oryza sativa	cis-regulatory element involved in endosperm expression	endosperm expression
BnGRP14-A03	BnaA03g02110D	AE-box	AGAAACAA	696	8	-	Arabidopsis thaliana	part of a module for light response	light response
BnGRP14-A03	BnaA03g02110D	ACE	CTAACGTATT	702	9	+	Petroselinum crispum	cis-acting element involved in light responsiveness	light response
BnGRP14-A03	BnaA03g02110D	TATA-box	TATAAA	716	6	-	Helianthus annuus	core promoter element around -30 of transcription start	core promoter element transcription start
BnGRP14-A03	BnaA03g02110D	TATA-box	TATAA	717	5	-	Arabidopsis thaliana	core promoter element around -30 of transcription start	core promoter element transcription start
BnGRP14-A03	BnaA03g02110D	TATA-box	TATA	718	4	+	Arabidopsis thaliana	core promoter element around -30 of transcription start	core promoter element transcription start
BnGRP14-A03	BnaA03g02110D		motif_sequence	747	4	-	organism	short_function	short_function
BnGRP14-A03	BnaA03g02110D	AuxRR-core	GGTCCAT	762	7	-	Nicotiana tabacum	cis-acting regulatory element involved in auxin responsiveness	auxin responsive
BnGRP14-A03	BnaA03g02110D		motif_sequence	786	4	-	organism	short_function	short_function
BnGRP14-A03	BnaA03g02110D		motif_sequence	1016	4	-	organism	short_function	short_function
BnGRP14-A03	BnaA03g02110D		motif_sequence	1051	4	-	organism	short_function	short_function
BnGRP14-A03	BnaA03g02110D	LTR	CCGAAA	1132	6	+	Hordeum vulgare	cis-acting element involved in low-temperature responsiveness	low-temperature responsiveness
BnGRP14-A03	BnaA03g02110D	CAAT-box	CCAAT	1151	5	-	Arabidopsis thaliana	common cis-acting element in promoter and enhancer regions	promoter and enhancer regions
BnGRP14-A03	BnaA03g02110D	TATA-box	ATATAT	1166	6	-	Brassica napus	core promoter element around -30 of transcription start	core promoter element transcription start
BnGRP14-A03	BnaA03g02110D	TATA-box	TATATA	1167	6	-	Arabidopsis thaliana	core promoter element around -30 of transcription start	core promoter element transcription start
BnGRP14-A03	BnaA03g02110D	TATA-box	TATA	1169	4	-	Arabidopsis thaliana	core promoter element around -30 of transcription start	core promoter element transcription start
BnGRP14-A03	BnaA03g02110D	TATA-box	TATA	1203	4	-	Arabidopsis thaliana	core promoter element around -30 of transcription start	core promoter element transcription start
BnGRP14-A03	BnaA03g02110D	TATA-box	taTATAAAtc	1301	9	-	Arabidopsis thaliana	core promoter element around -30 of transcription start	core promoter element transcription start
BnGRP14-A03	BnaA03g02110D	TATA-box	ATATAT	1302	6	-	Brassica napus	core promoter element around -30 of transcription start	core promoter element transcription start
BnGRP14-A03	BnaA03g02110D	TATA-box	TATATA	1303	6	-	Arabidopsis thaliana	core promoter element around -30 of transcription start	core promoter element transcription start
BnGRP14-A03	BnaA03g02110D	TATA-box	ATATAT	1304	6	-	Brassica napus	core promoter element around -30 of transcription start	core promoter element transcription start
BnGRP14-A03	BnaA03g02110D	TATA-box	TATATA	1305	6	-	Arabidopsis thaliana	core promoter element around -30 of transcription start	core promoter element transcription start
BnGRP14-A03	BnaA03g02110D	TATA-box	ATATAT	1306	6	-	Brassica napus	core promoter element around -30 of transcription start	core promoter element transcription start
BnGRP14-A03	BnaA03g02110D	TATA-box	TATATA	1307	6	-	Arabidopsis thaliana	core promoter element around -30 of transcription start	core promoter element transcription start
BnGRP14-A03	BnaA03g02110D	TATA-box	TATA	1309	4	-	Arabidopsis thaliana	core promoter element around -30 of transcription start	core promoter element transcription start
BnGRP14-A03	BnaA03g02110D		motif_sequence	1313	4	-	organism	short_function	short_function
BnGRP14-A03	BnaA03g02110D		motif_sequence	1345	4	+	organism	short_function	short_function
BnGRP14-A03	BnaA03g02110D	TATA-box	TATA	1375	4	-	Arabidopsis thaliana	core promoter element around -30 of transcription start	core promoter element transcription start
BnGRP14-A03	BnaA03g02110D		motif_sequence	1379	4	+	organism	short_function	short_function
BnGRP14-A03	BnaA03g02110D	TCCC-motif	TCTCCCT	1380	7	+	Spinacia oleracea	part of a light responsive element	light response
BnGRP14-A03	BnaA03g02110D		motif_sequence	1472	4	+	organism	short_function	short_function
BnGRP14-A03	BnaA03g02110D	GATA-motif	GATAGGA	1475	7	-	Arabidopsis thaliana	part of a light responsive element	light response
BnGRP14-A03	BnaA03g02110D	TATA-box	TATA	1539	4	-	Arabidopsis thaliana	core promoter element around -30 of transcription start	core promoter element transcription start
BnGRP14-A03	BnaA03g02110D	GA-motif	ATAGATAA	1540	8	+	Arabidopsis thaliana	part of a light responsive element	light response
BnGRP14-A03	BnaA03g02110D	CAAT-box	CAAAT	1596	5	+	Pisum sativum	common cis-acting element in promoter and enhancer regions	promoter and enhancer regions
BnGRP14-A03	BnaA03g02110D	CAAT-box	CAAAT	1618	5	+	Pisum sativum	common cis-acting element in promoter and enhancer regions	promoter and enhancer regions
BnGRP14-A03	BnaA03g02110D		motif_sequence	1683	4	+	organism	short_function	short_function
BnGRP14-A03	BnaA03g02110D	I-box	cCATATCCAAT	1735	10	-	Flaveria trinervia	part of a light responsive element	light response
BnGRP14-A03	BnaA03g02110D	CAAT-box	CCAAT	1772	5	-	Arabidopsis thaliana	common cis-acting element in promoter and enhancer regions	promoter and enhancer regions
BnGRP14-A03	BnaA03g02110D	CGTCA-motif	CGTCA	1877	5	-	Hordeum vulgare	cis-acting regulatory element involved in the MeJA-responsiveness	MeJA-responsiveness
BnGRP14-A03	BnaA03g02110D	TGA-box	TGACGTAA	1877	8	+	Glycine max	part of an auxin-responsive element	auxin responsive
BnGRP14-A03	BnaA03g02110D	TGACG-motif	TGACG	1877	5	+	Hordeum vulgare	cis-acting regulatory element involved in the MeJA-responsiveness	MeJA-responsiveness
BnGRP14-A03	BnaA03g02110D		motif_sequence	1886	4	-	organism	short_function	short_function
BnGRP14-A03	BnaA03g02110D	TATA-box	ATTATA	1890	6	+	Brassica napus	core promoter element around -30 of transcription start	core promoter element transcription start
BnGRP14-A03	BnaA03g02110D	TATA-box	TATATAA	1891	7	-	Arabidopsis thaliana	core promoter element around -30 of transcription start	core promoter element transcription start
BnGRP14-A03	BnaA03g02110D	TATA-box	TATATA	1892	6	-	Arabidopsis thaliana	core promoter element around -30 of transcription start	core promoter element transcription start
BnGRP14-A03	BnaA03g02110D	TATA-box	TATA	1894	4	-	Arabidopsis thaliana	core promoter element around -30 of transcription start	core promoter element transcription start
BnGRP14-A03	BnaA03g02110D	TGA-element	AACGAC	1903	6	-	Brassica oleracea	auxin-responsive element	auxin responsive
BnGRP14-A03	BnaA03g02110D	ABRE	ACGTG	1936	5	-	Arabidopsis thaliana	cis-acting element involved in the abscisic acid responsiveness	abscisic acid responsiveness
BnGRP14-A03	BnaA03g02110D	G-box	CACGTC	1936	6	+	Zea mays	cis-acting regulatory element involved in light responsiveness	light response
BnGRP14-A03	BnaA03g02110D	TATA-box	ATATAA	1959	6	+	Brassica oleracea	core promoter element around -30 of transcription start	core promoter element transcription start
BnGRP14-A03	BnaA03g02110D	TATA-box	TATA	1960	4	-	Arabidopsis thaliana	core promoter element around -30 of transcription start	core promoter element transcription start
BnGRP14-A03	BnaA03g02110D		motif_sequence	1972	4	+	organism	short_function	short_function
BnGRP14-A03	BnaA03g02110D	ARE	AAACCA	1986	6	+	Zea mays	cis-acting regulatory element essential for the anaerobic induction	anaerobic induction
BnGRP14-C03	BnaC03g03140D		motif_sequence	6	4	+	organism	short_function	short_function
BnGRP14-C03	BnaC03g03140D	ARE	AAACCA	30	6	+	Zea mays	cis-acting regulatory element essential for the anaerobic induction	anaerobic induction
BnGRP14-C03	BnaC03g03140D	CAAT-box	CCAAT	33	5	+	Arabidopsis thaliana	common cis-acting element in promoter and enhancer regions	promoter and enhancer regions
BnGRP14-C03	BnaC03g03140D	CAAT-box	CAAAT	122	5	-	Pisum sativum	common cis-acting element in promoter and enhancer regions	promoter and enhancer regions
BnGRP14-C03	BnaC03g03140D	O2-site	GTTGACGTGA	134	9	+	Zea mays	cis-acting regulatory element involved in zein metabolism regulation	zein metabolism regulation
BnGRP14-C03	BnaC03g03140D		motif_sequence	144	4	-	organism	short_function	short_function
BnGRP14-C03	BnaC03g03140D	TATA-box	ATATAT	148	6	+	Brassica napus	core promoter element around -30 of transcription start	core promoter element transcription start
BnGRP14-C03	BnaC03g03140D	TATA-box	TATA	149	4	+	Arabidopsis thaliana	core promoter element around -30 of transcription start	core promoter element transcription start
BnGRP14-C03	BnaC03g03140D	TATA-box	ATATAT	155	6	+	Brassica napus	core promoter element around -30 of transcription start	core promoter element transcription start
BnGRP14-C03	BnaC03g03140D	TATA-box	TATATA	156	6	+	Arabidopsis thaliana	core promoter element around -30 of transcription start	core promoter element transcription start
BnGRP14-C03	BnaC03g03140D	TATA-box	TATA	158	4	+	Arabidopsis thaliana	core promoter element around -30 of transcription start	core promoter element transcription start
BnGRP14-C03	BnaC03g03140D	ABRE	TACGGTC	168	7	+	Arabidopsis thaliana	cis-acting element involved in the abscisic acid responsiveness	abscisic acid responsiveness
BnGRP14-C03	BnaC03g03140D		motif_sequence	197	4	-	organism	short_function	short_function
BnGRP14-C03	BnaC03g03140D		motif_sequence	213	4	-	organism	short_function	short_function
BnGRP14-C03	BnaC03g03140D	LTR	CCGAAA	331	6	+	Hordeum vulgare	cis-acting element involved in low-temperature responsiveness	low-temperature responsiveness
BnGRP14-C03	BnaC03g03140D	TATA-box	ATATAT	424	6	+	Brassica napus	core promoter element around -30 of transcription start	core promoter element transcription start
BnGRP14-C03	BnaC03g03140D	TATA-box	TATA	425	4	+	Arabidopsis thaliana	core promoter element around -30 of transcription start	core promoter element transcription start
BnGRP14-C03	BnaC03g03140D	ARE	AAACCA	474	6	+	Zea mays	cis-acting regulatory element essential for the anaerobic induction	anaerobic induction
BnGRP14-C03	BnaC03g03140D	TATA-box	ATTATA	520	6	+	Brassica napus	core promoter element around -30 of transcription start	core promoter element transcription start
BnGRP14-C03	BnaC03g03140D	TATA-box	TATAA	521	5	-	Arabidopsis thaliana	core promoter element around -30 of transcription start	core promoter element transcription start
BnGRP14-C03	BnaC03g03140D	TATA-box	TATA	522	4	+	Arabidopsis thaliana	core promoter element around -30 of transcription start	core promoter element transcription start
BnGRP14-C03	BnaC03g03140D		motif_sequence	535	4	+	organism	short_function	short_function
BnGRP14-C03	BnaC03g03140D	G-box	CACGAC	552	6	-	Zea mays	cis-acting regulatory element involved in light responsiveness	light response
BnGRP14-C03	BnaC03g03140D		motif_sequence	575	4	+	organism	short_function	short_function
BnGRP14-C03	BnaC03g03140D	TATA-box	TATACA	591	6	-	Helianthus annuus	core promoter element around -30 of transcription start	core promoter element transcription start
BnGRP14-C03	BnaC03g03140D	TATA-box	TATA	593	4	+	Arabidopsis thaliana	core promoter element around -30 of transcription start	core promoter element transcription start
BnGRP14-C03	BnaC03g03140D	circadian	CAAAGATATC	614	9	-	Lycopersicon esculentum	cis-acting regulatory element involved in circadian control	circadian control
BnGRP14-C03	BnaC03g03140D	GCN4_motif	TGAGTCA	660	7	+	Oryza sativa	cis-regulatory element involved in endosperm expression	endosperm expression
BnGRP14-C03	BnaC03g03140D	AE-box	AGAAACAA	695	8	-	Arabidopsis thaliana	part of a module for light response	light response
BnGRP14-C03	BnaC03g03140D	ACE	CTAACGTATT	701	9	+	Petroselinum crispum	cis-acting element involved in light responsiveness	light response
BnGRP14-C03	BnaC03g03140D	TATA-box	TATA	707	4	+	Arabidopsis thaliana	core promoter element around -30 of transcription start	core promoter element transcription start
BnGRP14-C03	BnaC03g03140D	AuxRR-core	GGTCCAT	764	7	-	Nicotiana tabacum	cis-acting regulatory element involved in auxin responsiveness	auxin responsive
BnGRP14-C03	BnaC03g03140D		motif_sequence	788	4	-	organism	short_function	short_function
BnGRP14-C03	BnaC03g03140D	CAAT-box	CAAAT	852	5	+	Pisum sativum	common cis-acting element in promoter and enhancer regions	promoter and enhancer regions
BnGRP14-C03	BnaC03g03140D	CAAT-box	CCCAATTT	971	8	-	Arabidopsis thaliana	common cis-acting element in promoter and enhancer regions	promoter and enhancer regions
BnGRP14-C03	BnaC03g03140D	CAAT-box	CCAAT	973	5	-	Arabidopsis thaliana	common cis-acting element in promoter and enhancer regions	promoter and enhancer regions
BnGRP14-C03	BnaC03g03140D	TGA-element	AACGAC	982	6	+	Brassica oleracea	auxin-responsive element	auxin responsive
BnGRP14-C03	BnaC03g03140D		motif_sequence	1017	4	-	organism	short_function	short_function
BnGRP14-C03	BnaC03g03140D	LTR	CCGAAA	1138	6	+	Hordeum vulgare	cis-acting element involved in low-temperature responsiveness	low-temperature responsiveness
BnGRP14-C03	BnaC03g03140D	TATA-box	ATTATA	1207	6	+	Brassica napus	core promoter element around -30 of transcription start	core promoter element transcription start
BnGRP14-C03	BnaC03g03140D	TATA-box	TATAA	1208	5	-	Arabidopsis thaliana	core promoter element around -30 of transcription start	core promoter element transcription start
BnGRP14-C03	BnaC03g03140D	TATA-box	TATA	1209	4	-	Arabidopsis thaliana	core promoter element around -30 of transcription start	core promoter element transcription start
BnGRP14-C03	BnaC03g03140D	TATA-box	taTATAAAtc	1301	9	-	Arabidopsis thaliana	core promoter element around -30 of transcription start	core promoter element transcription start
BnGRP14-C03	BnaC03g03140D	TATA-box	ATATAT	1302	6	-	Brassica napus	core promoter element around -30 of transcription start	core promoter element transcription start
BnGRP14-C03	BnaC03g03140D	TATA-box	TATATA	1303	6	-	Arabidopsis thaliana	core promoter element around -30 of transcription start	core promoter element transcription start
BnGRP14-C03	BnaC03g03140D	TATA-box	ATATAT	1304	6	-	Brassica napus	core promoter element around -30 of transcription start	core promoter element transcription start
BnGRP14-C03	BnaC03g03140D	TATA-box	TATATA	1305	6	-	Arabidopsis thaliana	core promoter element around -30 of transcription start	core promoter element transcription start
BnGRP14-C03	BnaC03g03140D	TATA-box	ATATAT	1306	6	-	Brassica napus	core promoter element around -30 of transcription start	core promoter element transcription start
BnGRP14-C03	BnaC03g03140D	TATA-box	TATATA	1307	6	-	Arabidopsis thaliana	core promoter element around -30 of transcription start	core promoter element transcription start
BnGRP14-C03	BnaC03g03140D	TATA-box	TATA	1309	4	-	Arabidopsis thaliana	core promoter element around -30 of transcription start	core promoter element transcription start
BnGRP14-C03	BnaC03g03140D	TATA-box	taTATAAAtc	1346	9	+	Arabidopsis thaliana	core promoter element around -30 of transcription start	core promoter element transcription start
BnGRP14-C03	BnaC03g03140D	TATA-box	TATA	1375	4	-	Arabidopsis thaliana	core promoter element around -30 of transcription start	core promoter element transcription start
BnGRP14-C03	BnaC03g03140D		motif_sequence	1379	4	+	organism	short_function	short_function
BnGRP14-C03	BnaC03g03140D	TCCC-motif	TCTCCCT	1380	7	+	Spinacia oleracea	part of a light responsive element	light response
BnGRP14-C03	BnaC03g03140D	TGACG-motif	TGACG	1398	5	-	Hordeum vulgare	cis-acting regulatory element involved in the MeJA-responsiveness	MeJA-responsiveness
BnGRP14-C03	BnaC03g03140D	CGTCA-motif	CGTCA	1398	5	+	Hordeum vulgare	cis-acting regulatory element involved in the MeJA-responsiveness	MeJA-responsiveness
BnGRP14-C03	BnaC03g03140D		motif_sequence	1472	4	+	organism	short_function	short_function
BnGRP14-C03	BnaC03g03140D	GATA-motif	GATAGGA	1475	7	-	Arabidopsis thaliana	part of a light responsive element	light response
BnGRP14-C03	BnaC03g03140D	TATA-box	TATA	1539	4	-	Arabidopsis thaliana	core promoter element around -30 of transcription start	core promoter element transcription start
BnGRP14-C03	BnaC03g03140D	GA-motif	ATAGATAA	1540	8	+	Arabidopsis thaliana	part of a light responsive element	light response
BnGRP14-C03	BnaC03g03140D		motif_sequence	1683	4	+	organism	short_function	short_function
BnGRP14-C03	BnaC03g03140D	TATA-box	TATAAA	1699	6	-	Helianthus annuus	core promoter element around -30 of transcription start	core promoter element transcription start
BnGRP14-C03	BnaC03g03140D	TATA-box	TATAA	1700	5	-	Arabidopsis thaliana	core promoter element around -30 of transcription start	core promoter element transcription start
BnGRP14-C03	BnaC03g03140D	TATA-box	TATA	1701	4	-	Arabidopsis thaliana	core promoter element around -30 of transcription start	core promoter element transcription start
BnGRP14-C03	BnaC03g03140D	I-box	cCATATCCAAT	1735	10	-	Flaveria trinervia	part of a light responsive element	light response
BnGRP14-C03	BnaC03g03140D	CAAT-box	CCAAT	1772	5	-	Arabidopsis thaliana	common cis-acting element in promoter and enhancer regions	promoter and enhancer regions
BnGRP14-C03	BnaC03g03140D	MBSI	aaaAaaC(G/C)GTTA	1797	11	+	Petunia hybrida	MYB binding site involved in flavonoid biosynthetic genes regulation	MYB binding site
BnGRP14-C03	BnaC03g03140D	CGTCA-motif	CGTCA	1877	5	-	Hordeum vulgare	cis-acting regulatory element involved in the MeJA-responsiveness	MeJA-responsiveness
BnGRP14-C03	BnaC03g03140D	TGACG-motif	TGACG	1877	5	+	Hordeum vulgare	cis-acting regulatory element involved in the MeJA-responsiveness	MeJA-responsiveness
BnGRP14-C03	BnaC03g03140D	TGA-box	TGACGTAA	1877	8	+	Glycine max	part of an auxin-responsive element	auxin responsive
BnGRP14-C03	BnaC03g03140D	TATA-box	TATATAA	1891	7	-	Arabidopsis thaliana	core promoter element around -30 of transcription start	core promoter element transcription start
BnGRP14-C03	BnaC03g03140D	TATA-box	TATATA	1892	6	-	Arabidopsis thaliana	core promoter element around -30 of transcription start	core promoter element transcription start
BnGRP14-C03	BnaC03g03140D	TATA-box	TATA	1894	4	-	Arabidopsis thaliana	core promoter element around -30 of transcription start	core promoter element transcription start
BnGRP14-C03	BnaC03g03140D	TGA-element	AACGAC	1903	6	-	Brassica oleracea	auxin-responsive element	auxin responsive
BnGRP14-C03	BnaC03g03140D	ABRE	ACGTG	1936	5	-	Arabidopsis thaliana	cis-acting element involved in the abscisic acid responsiveness	abscisic acid responsiveness
BnGRP14-C03	BnaC03g03140D	G-box	CACGTC	1936	6	+	Zea mays	cis-acting regulatory element involved in light responsiveness	light response
BnGRP14-C03	BnaC03g03140D	ARE	AAACCA	1944	6	+	Zea mays	cis-acting regulatory element essential for the anaerobic induction	anaerobic induction
BnGRP14-C03	BnaC03g03140D		motif_sequence	1972	4	+	organism	short_function	short_function
BnGRP14-C03	BnaC03g03140D	ARE	AAACCA	1986	6	+	Zea mays	cis-acting regulatory element essential for the anaerobic induction	anaerobic induction
BnGRP17-Cnn	BnaCnng60890D	RY-element	CATGCATG	15	8	+	Helianthus annuus	cis-acting regulatory element involved in seed-specific regulation	seed-specific regulation
BnGRP17-Cnn	BnaCnng60890D		motif_sequence	72	4	-	organism	short_function	short_function
BnGRP17-Cnn	BnaCnng60890D	TCCC-motif	TCTCCCT	76	7	-	Spinacia oleracea	part of a light responsive element	light response
BnGRP17-Cnn	BnaCnng60890D	TCT-motif	TCTTAC	127	6	-	Arabidopsis thaliana	part of a light responsive element	light response
BnGRP17-Cnn	BnaCnng60890D	ARE	AAACCA	163	6	-	Zea mays	cis-acting regulatory element essential for the anaerobic induction	anaerobic induction
BnGRP17-Cnn	BnaCnng60890D	CAAT-box	CCAAT	185	5	+	Arabidopsis thaliana	common cis-acting element in promoter and enhancer regions	promoter and enhancer regions
BnGRP17-Cnn	BnaCnng60890D	G-box	CACGTT	208	6	-	Pisum sativum	cis-acting regulatory element involved in light responsiveness	light response
BnGRP17-Cnn	BnaCnng60890D	ABRE	ACGTG	209	5	+	Arabidopsis thaliana	cis-acting element involved in the abscisic acid responsiveness	abscisic acid responsiveness
BnGRP17-Cnn	BnaCnng60890D	TATA-box	ATATAT	251	6	+	Brassica napus	core promoter element around -30 of transcription start	core promoter element transcription start
BnGRP17-Cnn	BnaCnng60890D	TATA-box	TATA	252	4	+	Arabidopsis thaliana	core promoter element around -30 of transcription start	core promoter element transcription start
BnGRP17-Cnn	BnaCnng60890D		motif_sequence	270	4	+	organism	short_function	short_function
BnGRP17-Cnn	BnaCnng60890D	TCT-motif	TCTTAC	277	6	+	Arabidopsis thaliana	part of a light responsive element	light response
BnGRP17-Cnn	BnaCnng60890D	TATA-box	taTATAAAtc	302	9	-	Arabidopsis thaliana	core promoter element around -30 of transcription start	core promoter element transcription start
BnGRP17-Cnn	BnaCnng60890D	Box 4	ATTAAT	303	6	+	Petroselinum crispum	part of a conserved DNA module involved in light responsiveness	light response
BnGRP17-Cnn	BnaCnng60890D	TATA-box	ATATAT	307	6	+	Brassica napus	core promoter element around -30 of transcription start	core promoter element transcription start
BnGRP17-Cnn	BnaCnng60890D	TATA-box	TATA	308	4	+	Arabidopsis thaliana	core promoter element around -30 of transcription start	core promoter element transcription start
BnGRP17-Cnn	BnaCnng60890D	TATA-box	ATTATA	318	6	+	Brassica napus	core promoter element around -30 of transcription start	core promoter element transcription start
BnGRP17-Cnn	BnaCnng60890D	TATA-box	TATAA	319	5	-	Arabidopsis thaliana	core promoter element around -30 of transcription start	core promoter element transcription start
BnGRP17-Cnn	BnaCnng60890D	TATA-box	TATA	320	4	+	Arabidopsis thaliana	core promoter element around -30 of transcription start	core promoter element transcription start
BnGRP17-Cnn	BnaCnng60890D	TATA-box	TATAA	329	5	-	Arabidopsis thaliana	core promoter element around -30 of transcription start	core promoter element transcription start
BnGRP17-Cnn	BnaCnng60890D	TATA-box	TATA	330	4	+	Arabidopsis thaliana	core promoter element around -30 of transcription start	core promoter element transcription start
BnGRP17-Cnn	BnaCnng60890D	TATA-box	TATAAA	350	6	-	Helianthus annuus	core promoter element around -30 of transcription start	core promoter element transcription start
BnGRP17-Cnn	BnaCnng60890D	TATA-box	TATAA	351	5	-	Arabidopsis thaliana	core promoter element around -30 of transcription start	core promoter element transcription start
BnGRP17-Cnn	BnaCnng60890D	TATA-box	TATA	352	4	+	Arabidopsis thaliana	core promoter element around -30 of transcription start	core promoter element transcription start
BnGRP17-Cnn	BnaCnng60890D	I-box	TGATAATGT	377	9	+	Solanum tuberosum	part of a light responsive element	light response
BnGRP17-Cnn	BnaCnng60890D		motif_sequence	458	4	+	organism	short_function	short_function
BnGRP17-Cnn	BnaCnng60890D		motif_sequence	475	4	-	organism	short_function	short_function
BnGRP17-Cnn	BnaCnng60890D	TATA-box	TATA	515	4	+	Arabidopsis thaliana	core promoter element around -30 of transcription start	core promoter element transcription start
BnGRP17-Cnn	BnaCnng60890D	Sp1	GGGCGG	519	6	+	Oryza sativa	light responsive element	light response
BnGRP17-Cnn	BnaCnng60890D	CAAT-box	CCAAT	531	5	-	Arabidopsis thaliana	common cis-acting element in promoter and enhancer regions	promoter and enhancer regions
BnGRP17-Cnn	BnaCnng60890D		motif_sequence	576	4	-	organism	short_function	short_function
BnGRP17-Cnn	BnaCnng60890D	Sp1	GGGCGG	609	6	+	Oryza sativa	light responsive element	light response
BnGRP17-Cnn	BnaCnng60890D	CAAT-box	CAAAT	618	5	-	Pisum sativum	common cis-acting element in promoter and enhancer regions	promoter and enhancer regions
BnGRP17-Cnn	BnaCnng60890D		motif_sequence	629	4	-	organism	short_function	short_function
BnGRP17-Cnn	BnaCnng60890D	CAAT-box	CAAAT	637	5	+	Pisum sativum	common cis-acting element in promoter and enhancer regions	promoter and enhancer regions
BnGRP17-Cnn	BnaCnng60890D	LTR	CCGAAA	697	6	+	Hordeum vulgare	cis-acting element involved in low-temperature responsiveness	low-temperature responsiveness
BnGRP17-Cnn	BnaCnng60890D	TATA-box	TATAA	748	5	-	Arabidopsis thaliana	core promoter element around -30 of transcription start	core promoter element transcription start
BnGRP17-Cnn	BnaCnng60890D	TATA-box	TATA	749	4	+	Arabidopsis thaliana	core promoter element around -30 of transcription start	core promoter element transcription start
BnGRP17-Cnn	BnaCnng60890D	TATA-box	TATAA	755	5	-	Arabidopsis thaliana	core promoter element around -30 of transcription start	core promoter element transcription start
BnGRP17-Cnn	BnaCnng60890D	TATA-box	TATA	756	4	+	Arabidopsis thaliana	core promoter element around -30 of transcription start	core promoter element transcription start
BnGRP17-Cnn	BnaCnng60890D	LTR	CCGAAA	773	6	-	Hordeum vulgare	cis-acting element involved in low-temperature responsiveness	low-temperature responsiveness
BnGRP17-Cnn	BnaCnng60890D	TGA-element	AACGAC	784	6	+	Brassica oleracea	auxin-responsive element	auxin responsive
BnGRP17-Cnn	BnaCnng60890D		motif_sequence	809	4	-	organism	short_function	short_function
BnGRP17-Cnn	BnaCnng60890D	AT-rich sequence	TAAAATACT	847	9	-	Pisum sativum	element for maximal elicitor-mediated activation (2copies)	maximal elicitor-mediated activation
BnGRP17-Cnn	BnaCnng60890D	TATA-box	TATAAAA	851	7	-	Pisum sativum	core promoter element around -30 of transcription start	core promoter element transcription start
BnGRP17-Cnn	BnaCnng60890D	TATA-box	TATAAA	852	6	-	Helianthus annuus	core promoter element around -30 of transcription start	core promoter element transcription start
BnGRP17-Cnn	BnaCnng60890D	TATA-box	TATATAA	853	7	-	Arabidopsis thaliana	core promoter element around -30 of transcription start	core promoter element transcription start
BnGRP17-Cnn	BnaCnng60890D	TATA-box	TATATA	854	6	+	Arabidopsis thaliana	core promoter element around -30 of transcription start	core promoter element transcription start
BnGRP17-Cnn	BnaCnng60890D	TATA-box	TATA	856	4	+	Arabidopsis thaliana	core promoter element around -30 of transcription start	core promoter element transcription start
BnGRP17-Cnn	BnaCnng60890D	TCA-element	CCATCTTTTT	878	9	-	Nicotiana tabacum	cis-acting element involved in salicylic acid responsiveness	salicylic acid responsiveness
BnGRP17-Cnn	BnaCnng60890D	CAAT-box	CAAAT	974	5	-	Pisum sativum	common cis-acting element in promoter and enhancer regions	promoter and enhancer regions
BnGRP17-Cnn	BnaCnng60890D	TATA-box	TATATAA	1025	7	-	Arabidopsis thaliana	core promoter element around -30 of transcription start	core promoter element transcription start
BnGRP17-Cnn	BnaCnng60890D	TATA-box	TATATA	1026	6	-	Arabidopsis thaliana	core promoter element around -30 of transcription start	core promoter element transcription start
BnGRP17-Cnn	BnaCnng60890D	TATA-box	ATATAT	1027	6	-	Brassica napus	core promoter element around -30 of transcription start	core promoter element transcription start
BnGRP17-Cnn	BnaCnng60890D	TATA-box	TATA	1028	4	-	Arabidopsis thaliana	core promoter element around -30 of transcription start	core promoter element transcription start
BnGRP17-Cnn	BnaCnng60890D	TC-rich repeats	ATTCTCTAAC	1052	10	-	Nicotiana tabacum	cis-acting element involved in defense and stress responsiveness	defense and stress responsiveness
BnGRP17-Cnn	BnaCnng60890D	CGTCA-motif	CGTCA	1092	5	-	Hordeum vulgare	cis-acting regulatory element involved in the MeJA-responsiveness	MeJA-responsiveness
BnGRP17-Cnn	BnaCnng60890D	TGACG-motif	TGACG	1092	5	+	Hordeum vulgare	cis-acting regulatory element involved in the MeJA-responsiveness	MeJA-responsiveness
BnGRP17-Cnn	BnaCnng60890D	CAAT-box	CAAAT	1144	5	-	Pisum sativum	common cis-acting element in promoter and enhancer regions	promoter and enhancer regions
BnGRP17-Cnn	BnaCnng60890D	TATA-box	ATATAT	1149	6	-	Brassica napus	core promoter element around -30 of transcription start	core promoter element transcription start
BnGRP17-Cnn	BnaCnng60890D	TATA-box	TATA	1150	4	-	Arabidopsis thaliana	core promoter element around -30 of transcription start	core promoter element transcription start
BnGRP17-Cnn	BnaCnng60890D		motif_sequence	1185	4	-	organism	short_function	short_function
BnGRP17-Cnn	BnaCnng60890D	CCAAT-box	CAACGG	1204	6	-	Hordeum vulgare	MYBHv1 binding site	MYBHv1 binding site
BnGRP17-Cnn	BnaCnng60890D	MRE	AACCTAA	1251	7	-	Petroselinum crispum	MYB binding site involved in light responsiveness	MYB binding site
BnGRP17-Cnn	BnaCnng60890D	TATA-box	TATATAA	1271	7	-	Arabidopsis thaliana	core promoter element around -30 of transcription start	core promoter element transcription start
BnGRP17-Cnn	BnaCnng60890D	TATA-box	TATATA	1272	6	-	Arabidopsis thaliana	core promoter element around -30 of transcription start	core promoter element transcription start
BnGRP17-Cnn	BnaCnng60890D	TATA-box	ATATAA	1273	6	+	Brassica oleracea	core promoter element around -30 of transcription start	core promoter element transcription start
BnGRP17-Cnn	BnaCnng60890D	TATA-box	TATA	1274	4	-	Arabidopsis thaliana	core promoter element around -30 of transcription start	core promoter element transcription start
BnGRP17-Cnn	BnaCnng60890D	ABRE	TACGGTC	1281	7	+	Arabidopsis thaliana	cis-acting element involved in the abscisic acid responsiveness	abscisic acid responsiveness
BnGRP17-Cnn	BnaCnng60890D	TATA-box	TATATAA	1324	7	-	Arabidopsis thaliana	core promoter element around -30 of transcription start	core promoter element transcription start
BnGRP17-Cnn	BnaCnng60890D	TATA-box	TATATA	1325	6	-	Arabidopsis thaliana	core promoter element around -30 of transcription start	core promoter element transcription start
BnGRP17-Cnn	BnaCnng60890D	TATA-box	ATATAT	1326	6	-	Brassica napus	core promoter element around -30 of transcription start	core promoter element transcription start
BnGRP17-Cnn	BnaCnng60890D	TATA-box	TATA	1327	4	-	Arabidopsis thaliana	core promoter element around -30 of transcription start	core promoter element transcription start
BnGRP17-Cnn	BnaCnng60890D	TATA-box	TATAA	1386	5	-	Arabidopsis thaliana	core promoter element around -30 of transcription start	core promoter element transcription start
BnGRP17-Cnn	BnaCnng60890D	TATA-box	TATA	1387	4	-	Arabidopsis thaliana	core promoter element around -30 of transcription start	core promoter element transcription start
BnGRP17-Cnn	BnaCnng60890D	MRE	AACCTAA	1407	7	+	Petroselinum crispum	MYB binding site involved in light responsiveness	MYB binding site
BnGRP17-Cnn	BnaCnng60890D	AE-box	AGAAACTT	1413	8	+	Arabidopsis thaliana	part of a module for light response	light response
BnGRP17-Cnn	BnaCnng60890D	TATA-box	TATAAAA	1467	7	-	Pisum sativum	core promoter element around -30 of transcription start	core promoter element transcription start
BnGRP17-Cnn	BnaCnng60890D	TATA-box	TATAAA	1468	6	-	Helianthus annuus	core promoter element around -30 of transcription start	core promoter element transcription start
BnGRP17-Cnn	BnaCnng60890D	TATA-box	TATATAA	1469	7	-	Arabidopsis thaliana	core promoter element around -30 of transcription start	core promoter element transcription start
BnGRP17-Cnn	BnaCnng60890D	TATA-box	TATATA	1470	6	-	Arabidopsis thaliana	core promoter element around -30 of transcription start	core promoter element transcription start
BnGRP17-Cnn	BnaCnng60890D	TATA-box	ATATAT	1471	6	-	Brassica napus	core promoter element around -30 of transcription start	core promoter element transcription start
BnGRP17-Cnn	BnaCnng60890D	TATA-box	TATA	1472	4	-	Arabidopsis thaliana	core promoter element around -30 of transcription start	core promoter element transcription start
BnGRP17-Cnn	BnaCnng60890D	TATA-box	TATA	1508	4	-	Arabidopsis thaliana	core promoter element around -30 of transcription start	core promoter element transcription start
BnGRP17-Cnn	BnaCnng60890D	TATA-box	ATATAA	1512	6	+	Brassica oleracea	core promoter element around -30 of transcription start	core promoter element transcription start
BnGRP17-Cnn	BnaCnng60890D	TATA-box	TATA	1513	4	-	Arabidopsis thaliana	core promoter element around -30 of transcription start	core promoter element transcription start
BnGRP17-Cnn	BnaCnng60890D	TATA-box	TATAAAT	1542	7	-	Brassica juncea	core promoter element around -30 of transcription start	core promoter element transcription start
BnGRP17-Cnn	BnaCnng60890D	TATA-box	TATAAA	1543	6	-	Helianthus annuus	core promoter element around -30 of transcription start	core promoter element transcription start
BnGRP17-Cnn	BnaCnng60890D	TATA-box	TATAA	1544	5	-	Arabidopsis thaliana	core promoter element around -30 of transcription start	core promoter element transcription start
BnGRP17-Cnn	BnaCnng60890D	TATA-box	TATA	1545	4	-	Arabidopsis thaliana	core promoter element around -30 of transcription start	core promoter element transcription start
BnGRP17-Cnn	BnaCnng60890D	CAAT-box	CAAAT	1559	5	+	Pisum sativum	common cis-acting element in promoter and enhancer regions	promoter and enhancer regions
BnGRP17-Cnn	BnaCnng60890D	TATA-box	ATATAT	1590	6	-	Brassica napus	core promoter element around -30 of transcription start	core promoter element transcription start
BnGRP17-Cnn	BnaCnng60890D	TATA-box	TATATA	1591	6	-	Arabidopsis thaliana	core promoter element around -30 of transcription start	core promoter element transcription start
BnGRP17-Cnn	BnaCnng60890D	TATA-box	TATA	1593	4	-	Arabidopsis thaliana	core promoter element around -30 of transcription start	core promoter element transcription start
BnGRP17-Cnn	BnaCnng60890D	MBS	CAACTG	1651	6	+	Arabidopsis thaliana	MYB binding site involved in drought-inducibility	MYB binding site
BnGRP17-Cnn	BnaCnng60890D	CAAT-box	CAAAT	1719	5	+	Pisum sativum	common cis-acting element in promoter and enhancer regions	promoter and enhancer regions
BnGRP17-Cnn	BnaCnng60890D	TATA-box	ATATAT	1722	6	-	Brassica napus	core promoter element around -30 of transcription start	core promoter element transcription start
BnGRP17-Cnn	BnaCnng60890D	TATA-box	TATA	1723	4	-	Arabidopsis thaliana	core promoter element around -30 of transcription start	core promoter element transcription start
BnGRP17-Cnn	BnaCnng60890D	TC-rich repeats	GTTTTCTTAC	1787	9	-	Nicotiana tabacum	cis-acting element involved in defense and stress responsiveness	defense and stress responsiveness
BnGRP17-Cnn	BnaCnng60890D	CAAT-box	CAAAT	1841	5	+	Pisum sativum	common cis-acting element in promoter and enhancer regions	promoter and enhancer regions
BnGRP17-Cnn	BnaCnng60890D	CAAT-box	CAAAT	1857	5	+	Pisum sativum	common cis-acting element in promoter and enhancer regions	promoter and enhancer regions
BnGRP17-Cnn	BnaCnng60890D	CGTCA-motif	CGTCA	1868	5	-	Hordeum vulgare	cis-acting regulatory element involved in the MeJA-responsiveness	MeJA-responsiveness
BnGRP17-Cnn	BnaCnng60890D	TGA-box	TGACGTAA	1868	8	+	Glycine max	part of an auxin-responsive element	auxin responsive
BnGRP17-Cnn	BnaCnng60890D	TGACG-motif	TGACG	1868	5	+	Hordeum vulgare	cis-acting regulatory element involved in the MeJA-responsiveness	MeJA-responsiveness
BnGRP17-Cnn	BnaCnng60890D		motif_sequence	1877	4	-	organism	short_function	short_function
BnGRP17-Cnn	BnaCnng60890D		motif_sequence	1881	4	+	organism	short_function	short_function
BnGRP17-Cnn	BnaCnng60890D	TATA-box	ATATAT	1887	6	-	Brassica napus	core promoter element around -30 of transcription start	core promoter element transcription start
BnGRP17-Cnn	BnaCnng60890D	TATA-box	TATATA	1888	6	-	Arabidopsis thaliana	core promoter element around -30 of transcription start	core promoter element transcription start
BnGRP17-Cnn	BnaCnng60890D	TATA-box	TATA	1890	4	-	Arabidopsis thaliana	core promoter element around -30 of transcription start	core promoter element transcription start
BnGRP17-Cnn	BnaCnng60890D	TCA-element	CCATCTTTTT	1897	9	+	Nicotiana tabacum	cis-acting element involved in salicylic acid responsiveness	salicylic acid responsiveness
BnGRP17-Cnn	BnaCnng60890D	RY-element	CATGCATG	1915	8	-	Helianthus annuus	cis-acting regulatory element involved in seed-specific regulation	seed-specific regulation
BnGRP17-Cnn	BnaCnng60890D	ABRE	ACGTG	1932	5	-	Arabidopsis thaliana	cis-acting element involved in the abscisic acid responsiveness	abscisic acid responsiveness
BnGRP17-Cnn	BnaCnng60890D	G-box	CACGTC	1932	6	+	Zea mays	cis-acting regulatory element involved in light responsiveness	light response
BnGRP17-Cnn	BnaCnng60890D		motif_sequence	1972	4	+	organism	short_function	short_function
BnGRP17-Cnn	BnaCnng60890D	ARE	AAACCA	1986	6	+	Zea mays	cis-acting regulatory element essential for the anaerobic induction	anaerobic induction
BnGRP17-A10c	BnaA10g23970D	TC-rich repeats	ATTCTCTAAC	209	9	-	Nicotiana tabacum	cis-acting element involved in defense and stress responsiveness	defense and stress responsiveness
BnGRP17-A10c	BnaA10g23970D	TATA-box	TATA	218	4	+	Arabidopsis thaliana	core promoter element around -30 of transcription start	core promoter element transcription start
BnGRP17-A10c	BnaA10g23970D		motif_sequence	256	4	+	organism	short_function	short_function
BnGRP17-A10c	BnaA10g23970D	TATA-box	ATTATA	281	6	+	Brassica napus	core promoter element around -30 of transcription start	core promoter element transcription start
BnGRP17-A10c	BnaA10g23970D	TATA-box	TATAA	282	5	-	Arabidopsis thaliana	core promoter element around -30 of transcription start	core promoter element transcription start
BnGRP17-A10c	BnaA10g23970D	TATA-box	TATA	283	4	+	Arabidopsis thaliana	core promoter element around -30 of transcription start	core promoter element transcription start
BnGRP17-A10c	BnaA10g23970D	TATA-box	TAAAGATT	302	8	+	Arabidopsis thaliana	core promoter element around -30 of transcription start	core promoter element transcription start
BnGRP17-A10c	BnaA10g23970D	CAAT-box	CAAAT	307	5	-	Pisum sativum	common cis-acting element in promoter and enhancer regions	promoter and enhancer regions
BnGRP17-A10c	BnaA10g23970D		motif_sequence	340	4	+	organism	short_function	short_function
BnGRP17-A10c	BnaA10g23970D	TATA-box	TATA	358	4	+	Arabidopsis thaliana	core promoter element around -30 of transcription start	core promoter element transcription start
BnGRP17-A10c	BnaA10g23970D	CAAT-box	CCAAT	365	5	-	Arabidopsis thaliana	common cis-acting element in promoter and enhancer regions	promoter and enhancer regions
BnGRP17-A10c	BnaA10g23970D	TATA-box	TATA	389	4	+	Arabidopsis thaliana	core promoter element around -30 of transcription start	core promoter element transcription start
BnGRP17-A10c	BnaA10g23970D	ARE	AAACCA	397	6	-	Zea mays	cis-acting regulatory element essential for the anaerobic induction	anaerobic induction
BnGRP17-A10c	BnaA10g23970D	CAAT-box	CAAAT	443	5	-	Pisum sativum	common cis-acting element in promoter and enhancer regions	promoter and enhancer regions
BnGRP17-A10c	BnaA10g23970D	TATA-box	ATATAT	456	6	+	Brassica napus	core promoter element around -30 of transcription start	core promoter element transcription start
BnGRP17-A10c	BnaA10g23970D	TATA-box	TATA	457	4	+	Arabidopsis thaliana	core promoter element around -30 of transcription start	core promoter element transcription start
BnGRP17-A10c	BnaA10g23970D		motif_sequence	463	4	-	organism	short_function	short_function
BnGRP17-A10c	BnaA10g23970D	MBS	CAACTG	466	6	-	Arabidopsis thaliana	MYB binding site involved in drought-inducibility	MYB binding site
BnGRP17-A10c	BnaA10g23970D	CAAT-box	CAAAT	494	5	-	Pisum sativum	common cis-acting element in promoter and enhancer regions	promoter and enhancer regions
BnGRP17-A10c	BnaA10g23970D	CAAT-box	CAAAT	502	5	-	Pisum sativum	common cis-acting element in promoter and enhancer regions	promoter and enhancer regions
BnGRP17-A10c	BnaA10g23970D	TATA-box	TATA	523	4	+	Arabidopsis thaliana	core promoter element around -30 of transcription start	core promoter element transcription start
BnGRP17-A10c	BnaA10g23970D	CAAT-box	CCAAT	540	5	+	Arabidopsis thaliana	common cis-acting element in promoter and enhancer regions	promoter and enhancer regions
BnGRP17-A10c	BnaA10g23970D	TATA-box	TACAAAA	569	7	-	Oryza sativa	core promoter element around -30 of transcription start	core promoter element transcription start
BnGRP17-A10c	BnaA10g23970D	Box 4	ATTAAT	579	6	+	Petroselinum crispum	part of a conserved DNA module involved in light responsiveness	light response
BnGRP17-A10c	BnaA10g23970D	Unnamed__1	GAATTTAATTAA	584	11	+	Glycine max	60K protein binding site	60K protein binding site
BnGRP17-A10c	BnaA10g23970D	Box 4	ATTAAT	591	6	+	Petroselinum crispum	part of a conserved DNA module involved in light responsiveness	light response
BnGRP17-A10c	BnaA10g23970D	CAAT-box	CAAAT	605	5	+	Pisum sativum	common cis-acting element in promoter and enhancer regions	promoter and enhancer regions
BnGRP17-A10c	BnaA10g23970D	CAAT-box	CAAAT	614	5	-	Pisum sativum	common cis-acting element in promoter and enhancer regions	promoter and enhancer regions
BnGRP17-A10c	BnaA10g23970D		motif_sequence	648	4	+	organism	short_function	short_function
BnGRP17-A10c	BnaA10g23970D		motif_sequence	650	4	-	organism	short_function	short_function
BnGRP17-A10c	BnaA10g23970D	CAAT-box	CAAAT	673	5	+	Pisum sativum	common cis-acting element in promoter and enhancer regions	promoter and enhancer regions
BnGRP17-A10c	BnaA10g23970D	TATA-box	TATATAA	693	7	-	Arabidopsis thaliana	core promoter element around -30 of transcription start	core promoter element transcription start
BnGRP17-A10c	BnaA10g23970D	TATA-box	TATATA	694	6	+	Arabidopsis thaliana	core promoter element around -30 of transcription start	core promoter element transcription start
BnGRP17-A10c	BnaA10g23970D	TATA-box	ATATAT	695	6	+	Brassica napus	core promoter element around -30 of transcription start	core promoter element transcription start
BnGRP17-A10c	BnaA10g23970D	TATA-box	TATATA	696	6	+	Arabidopsis thaliana	core promoter element around -30 of transcription start	core promoter element transcription start
BnGRP17-A10c	BnaA10g23970D	TATA-box	TATA	698	4	+	Arabidopsis thaliana	core promoter element around -30 of transcription start	core promoter element transcription start
BnGRP17-A10c	BnaA10g23970D	CAAT-box	CAAAT	728	5	+	Pisum sativum	common cis-acting element in promoter and enhancer regions	promoter and enhancer regions
BnGRP17-A10c	BnaA10g23970D	Box 4	ATTAAT	777	6	+	Petroselinum crispum	part of a conserved DNA module involved in light responsiveness	light response
BnGRP17-A10c	BnaA10g23970D	GA-motif	ATAGATAA	781	8	+	Arabidopsis thaliana	part of a light responsive element	light response
BnGRP17-A10c	BnaA10g23970D	CAAT-box	CAAAT	792	5	-	Pisum sativum	common cis-acting element in promoter and enhancer regions	promoter and enhancer regions
BnGRP17-A10c	BnaA10g23970D		motif_sequence	906	4	+	organism	short_function	short_function
BnGRP17-A10c	BnaA10g23970D		motif_sequence	929	4	-	organism	short_function	short_function
BnGRP17-A10c	BnaA10g23970D	TATA-box	TATA	952	4	+	Arabidopsis thaliana	core promoter element around -30 of transcription start	core promoter element transcription start
BnGRP17-A10c	BnaA10g23970D		motif_sequence	965	4	-	organism	short_function	short_function
BnGRP17-A10c	BnaA10g23970D	TATA-box	ATATAA	969	6	+	Brassica oleracea	core promoter element around -30 of transcription start	core promoter element transcription start
BnGRP17-A10c	BnaA10g23970D	TATA-box	TATA	970	4	+	Arabidopsis thaliana	core promoter element around -30 of transcription start	core promoter element transcription start
BnGRP17-A10c	BnaA10g23970D	CAAT-box	CAAAT	1029	5	-	Pisum sativum	common cis-acting element in promoter and enhancer regions	promoter and enhancer regions
BnGRP17-A10c	BnaA10g23970D	TATA-box	TATA	1044	4	-	Arabidopsis thaliana	core promoter element around -30 of transcription start	core promoter element transcription start
BnGRP17-A10c	BnaA10g23970D	CAAT-box	CAAAT	1056	5	-	Pisum sativum	common cis-acting element in promoter and enhancer regions	promoter and enhancer regions
BnGRP17-A10c	BnaA10g23970D	TATA-box	TATA	1070	4	-	Arabidopsis thaliana	core promoter element around -30 of transcription start	core promoter element transcription start
BnGRP17-A10c	BnaA10g23970D		motif_sequence	1082	4	-	organism	short_function	short_function
BnGRP17-A10c	BnaA10g23970D	TATA-box	ATATAT	1164	6	-	Brassica napus	core promoter element around -30 of transcription start	core promoter element transcription start
BnGRP17-A10c	BnaA10g23970D	TATA-box	TATA	1165	4	-	Arabidopsis thaliana	core promoter element around -30 of transcription start	core promoter element transcription start
BnGRP17-A10c	BnaA10g23970D	CAT-box	GCCACT	1201	6	-	Arabidopsis thaliana	cis-acting regulatory element related to meristem expression	meristem expression
BnGRP17-A10c	BnaA10g23970D		motif_sequence	1205	4	-	organism	short_function	short_function
BnGRP17-A10c	BnaA10g23970D	TATA-box	ATATAT	1275	6	-	Brassica napus	core promoter element around -30 of transcription start	core promoter element transcription start
BnGRP17-A10c	BnaA10g23970D	TATA-box	TATA	1276	4	-	Arabidopsis thaliana	core promoter element around -30 of transcription start	core promoter element transcription start
BnGRP17-A10c	BnaA10g23970D	TC-rich repeats	ATTCTCTAAC	1300	10	-	Nicotiana tabacum	cis-acting element involved in defense and stress responsiveness	defense and stress responsiveness
BnGRP17-A10c	BnaA10g23970D	CAAT-box	CAAAT	1357	5	-	Pisum sativum	common cis-acting element in promoter and enhancer regions	promoter and enhancer regions
BnGRP17-A10c	BnaA10g23970D		motif_sequence	1378	4	+	organism	short_function	short_function
BnGRP17-A10c	BnaA10g23970D		motif_sequence	1398	4	-	organism	short_function	short_function
BnGRP17-A10c	BnaA10g23970D	CCAAT-box	CAACGG	1417	6	-	Hordeum vulgare	MYBHv1 binding site	MYBHv1 binding site
BnGRP17-A10c	BnaA10g23970D	AT-rich sequence	TAAAATACT	1432	9	-	Pisum sativum	element for maximal elicitor-mediated activation (2copies)	maximal elicitor-mediated activation
BnGRP17-A10c	BnaA10g23970D	TATA-box	TATAAAA	1478	7	-	Pisum sativum	core promoter element around -30 of transcription start	core promoter element transcription start
BnGRP17-A10c	BnaA10g23970D	TATA-box	TATAAA	1479	6	-	Helianthus annuus	core promoter element around -30 of transcription start	core promoter element transcription start
BnGRP17-A10c	BnaA10g23970D	TATA-box	TATATAA	1480	7	-	Arabidopsis thaliana	core promoter element around -30 of transcription start	core promoter element transcription start
BnGRP17-A10c	BnaA10g23970D	TATA-box	TATATA	1481	6	-	Arabidopsis thaliana	core promoter element around -30 of transcription start	core promoter element transcription start
BnGRP17-A10c	BnaA10g23970D	TATA-box	ATATAT	1482	6	-	Brassica napus	core promoter element around -30 of transcription start	core promoter element transcription start
BnGRP17-A10c	BnaA10g23970D	TATA-box	TATA	1483	4	-	Arabidopsis thaliana	core promoter element around -30 of transcription start	core promoter element transcription start
BnGRP17-A10c	BnaA10g23970D	TATA-box	TATA	1519	4	-	Arabidopsis thaliana	core promoter element around -30 of transcription start	core promoter element transcription start
BnGRP17-A10c	BnaA10g23970D	TATA-box	ATATAA	1523	6	+	Brassica oleracea	core promoter element around -30 of transcription start	core promoter element transcription start
BnGRP17-A10c	BnaA10g23970D	TATA-box	TATA	1524	4	-	Arabidopsis thaliana	core promoter element around -30 of transcription start	core promoter element transcription start
BnGRP17-A10c	BnaA10g23970D	TATA-box	TATAAAT	1553	7	-	Brassica juncea	core promoter element around -30 of transcription start	core promoter element transcription start
BnGRP17-A10c	BnaA10g23970D	TATA-box	TATAAA	1554	6	-	Helianthus annuus	core promoter element around -30 of transcription start	core promoter element transcription start
BnGRP17-A10c	BnaA10g23970D	TATA-box	TATAA	1555	5	-	Arabidopsis thaliana	core promoter element around -30 of transcription start	core promoter element transcription start
BnGRP17-A10c	BnaA10g23970D	TATA-box	TATA	1556	4	-	Arabidopsis thaliana	core promoter element around -30 of transcription start	core promoter element transcription start
BnGRP17-A10c	BnaA10g23970D	CAAT-box	CAAAT	1570	5	+	Pisum sativum	common cis-acting element in promoter and enhancer regions	promoter and enhancer regions
BnGRP17-A10c	BnaA10g23970D	CAAT-box	CAAAT	1728	5	+	Pisum sativum	common cis-acting element in promoter and enhancer regions	promoter and enhancer regions
BnGRP17-A10c	BnaA10g23970D	O2-site	GATGA(C/T)(A/G)TG(A/G)	1734	8	+	Zea mays	cis-acting regulatory element involved in zein metabolism regulation	zein metabolism regulation
BnGRP17-A10c	BnaA10g23970D	TC-rich repeats	GTTTTCTTAC	1787	9	-	Nicotiana tabacum	cis-acting element involved in defense and stress responsiveness	defense and stress responsiveness
BnGRP17-A10c	BnaA10g23970D	CAAT-box	CAAAT	1841	5	+	Pisum sativum	common cis-acting element in promoter and enhancer regions	promoter and enhancer regions
BnGRP17-A10c	BnaA10g23970D	CAAT-box	CAAAT	1857	5	+	Pisum sativum	common cis-acting element in promoter and enhancer regions	promoter and enhancer regions
BnGRP17-A10c	BnaA10g23970D	CGTCA-motif	CGTCA	1868	5	-	Hordeum vulgare	cis-acting regulatory element involved in the MeJA-responsiveness	MeJA-responsiveness
BnGRP17-A10c	BnaA10g23970D	TGACG-motif	TGACG	1868	5	+	Hordeum vulgare	cis-acting regulatory element involved in the MeJA-responsiveness	MeJA-responsiveness
BnGRP17-A10c	BnaA10g23970D	TGA-box	TGACGTAA	1868	8	+	Glycine max	part of an auxin-responsive element	auxin responsive
BnGRP17-A10c	BnaA10g23970D		motif_sequence	1877	4	-	organism	short_function	short_function
BnGRP17-A10c	BnaA10g23970D		motif_sequence	1881	4	+	organism	short_function	short_function
BnGRP17-A10c	BnaA10g23970D	TATA-box	ATATAT	1887	6	-	Brassica napus	core promoter element around -30 of transcription start	core promoter element transcription start
BnGRP17-A10c	BnaA10g23970D	TATA-box	TATATA	1888	6	-	Arabidopsis thaliana	core promoter element around -30 of transcription start	core promoter element transcription start
BnGRP17-A10c	BnaA10g23970D	TATA-box	TATA	1890	4	-	Arabidopsis thaliana	core promoter element around -30 of transcription start	core promoter element transcription start
BnGRP17-A10c	BnaA10g23970D	TCA-element	CCATCTTTTT	1897	9	+	Nicotiana tabacum	cis-acting element involved in salicylic acid responsiveness	salicylic acid responsiveness
BnGRP17-A10c	BnaA10g23970D	RY-element	CATGCATG	1915	8	-	Helianthus annuus	cis-acting regulatory element involved in seed-specific regulation	seed-specific regulation
BnGRP17-A10c	BnaA10g23970D	ABRE	ACGTG	1932	5	-	Arabidopsis thaliana	cis-acting element involved in the abscisic acid responsiveness	abscisic acid responsiveness
BnGRP17-A10c	BnaA10g23970D	G-box	CACGTC	1932	6	+	Zea mays	cis-acting regulatory element involved in light responsiveness	light response
BnGRP17-A10c	BnaA10g23970D		motif_sequence	1972	4	+	organism	short_function	short_function
BnGRP17-A10c	BnaA10g23970D	ARE	AAACCA	1986	6	+	Zea mays	cis-acting regulatory element essential for the anaerobic induction	anaerobic induction
BnGRP17-A10b	BnaA10g23960D	GATA-motif	GATAGGG	21	7	-	Pisum sativum	part of a light responsive element	light response
BnGRP17-A10b	BnaA10g23960D		motif_sequence	36	4	-	organism	short_function	short_function
BnGRP17-A10b	BnaA10g23960D	O2-site	GATGACATGG	54	9	+	Zea mays	cis-acting regulatory element involved in zein metabolism regulation	zein metabolism regulation
BnGRP17-A10b	BnaA10g23960D	CAT-box	GCCACT	83	6	+	Arabidopsis thaliana	cis-acting regulatory element related to meristem expression	meristem expression
BnGRP17-A10b	BnaA10g23960D	G-box	CACGTT	98	6	-	Pisum sativum	cis-acting regulatory element involved in light responsiveness	light response
BnGRP17-A10b	BnaA10g23960D	ABRE	ACGTG	99	5	+	Arabidopsis thaliana	cis-acting element involved in the abscisic acid responsiveness	abscisic acid responsiveness
BnGRP17-A10b	BnaA10g23960D	TC-rich repeats	GTTTTCTTAC	113	9	-	Nicotiana tabacum	cis-acting element involved in defense and stress responsiveness	defense and stress responsiveness
BnGRP17-A10b	BnaA10g23960D	TCT-motif	TCTTAC	113	6	-	Arabidopsis thaliana	part of a light responsive element	light response
BnGRP17-A10b	BnaA10g23960D		motif_sequence	125	4	+	organism	short_function	short_function
BnGRP17-A10b	BnaA10g23960D	TATA-box	TATA	158	4	+	Arabidopsis thaliana	core promoter element around -30 of transcription start	core promoter element transcription start
BnGRP17-A10b	BnaA10g23960D	ARE	AAACCA	179	6	-	Zea mays	cis-acting regulatory element essential for the anaerobic induction	anaerobic induction
BnGRP17-A10b	BnaA10g23960D	LTR	CCGAAA	183	6	-	Hordeum vulgare	cis-acting element involved in low-temperature responsiveness	low-temperature responsiveness
BnGRP17-A10b	BnaA10g23960D	TCA-element	CCATCTTTTT	206	9	+	Nicotiana tabacum	cis-acting element involved in salicylic acid responsiveness	salicylic acid responsiveness
BnGRP17-A10b	BnaA10g23960D	ARE	AAACCA	232	6	+	Zea mays	cis-acting regulatory element essential for the anaerobic induction	anaerobic induction
BnGRP17-A10b	BnaA10g23960D	Box 4	ATTAAT	292	6	+	Petroselinum crispum	part of a conserved DNA module involved in light responsiveness	light response
BnGRP17-A10b	BnaA10g23960D	LTR	CCGAAA	382	6	+	Hordeum vulgare	cis-acting element involved in low-temperature responsiveness	low-temperature responsiveness
BnGRP17-A10b	BnaA10g23960D	ARE	AAACCA	845	6	-	Zea mays	cis-acting regulatory element essential for the anaerobic induction	anaerobic induction
BnGRP17-A10b	BnaA10g23960D	chs-Unit 1 m1	ACCTAACCCGC	870	10	-	Hordeum vulgare	part of a light responsive element	light response
BnGRP17-A10b	BnaA10g23960D	TATA-box	ccTATAAAaa	905	9	-	Arabidopsis thaliana	core promoter element around -30 of transcription start	core promoter element transcription start
BnGRP17-A10b	BnaA10g23960D	TATA-box	ATTATA	923	6	+	Brassica napus	core promoter element around -30 of transcription start	core promoter element transcription start
BnGRP17-A10b	BnaA10g23960D	TATA-box	TATATAA	924	7	-	Arabidopsis thaliana	core promoter element around -30 of transcription start	core promoter element transcription start
BnGRP17-A10b	BnaA10g23960D	TATA-box	TATATA	925	6	+	Arabidopsis thaliana	core promoter element around -30 of transcription start	core promoter element transcription start
BnGRP17-A10b	BnaA10g23960D	TATA-box	ATATAT	926	6	+	Brassica napus	core promoter element around -30 of transcription start	core promoter element transcription start
BnGRP17-A10b	BnaA10g23960D	TATA-box	TATA	927	4	+	Arabidopsis thaliana	core promoter element around -30 of transcription start	core promoter element transcription start
BnGRP17-A10b	BnaA10g23960D	TATA-box	TATA	950	4	+	Arabidopsis thaliana	core promoter element around -30 of transcription start	core promoter element transcription start
BnGRP17-A10b	BnaA10g23960D	TATA-box	ATATAT	963	6	+	Brassica napus	core promoter element around -30 of transcription start	core promoter element transcription start
BnGRP17-A10b	BnaA10g23960D	TATA-box	TATA	964	4	+	Arabidopsis thaliana	core promoter element around -30 of transcription start	core promoter element transcription start
BnGRP17-A10b	BnaA10g23960D	TATA-box	TATA	973	4	+	Arabidopsis thaliana	core promoter element around -30 of transcription start	core promoter element transcription start
BnGRP17-A10b	BnaA10g23960D	TATA-box	TATTTAAA	979	8	-	Arabidopsis thaliana	core promoter element around -30 of transcription start	core promoter element transcription start
BnGRP17-A10b	BnaA10g23960D	CAAT-box	CCAAT	1020	5	-	Arabidopsis thaliana	common cis-acting element in promoter and enhancer regions	promoter and enhancer regions
BnGRP17-A10b	BnaA10g23960D	TATA-box	TACAAAA	1042	7	+	Oryza sativa	core promoter element around -30 of transcription start	core promoter element transcription start
BnGRP17-A10b	BnaA10g23960D	CAAT-box	CAAAT	1077	5	-	Pisum sativum	common cis-acting element in promoter and enhancer regions	promoter and enhancer regions
BnGRP17-A10b	BnaA10g23960D	TATA-box	TATA	1084	4	-	Arabidopsis thaliana	core promoter element around -30 of transcription start	core promoter element transcription start
BnGRP17-A10b	BnaA10g23960D	TATA-box	TATATA	1122	6	-	Arabidopsis thaliana	core promoter element around -30 of transcription start	core promoter element transcription start
BnGRP17-A10b	BnaA10g23960D	TATA-box	ATATAT	1123	6	-	Brassica napus	core promoter element around -30 of transcription start	core promoter element transcription start
BnGRP17-A10b	BnaA10g23960D	TATA-box	TATATA	1124	6	-	Arabidopsis thaliana	core promoter element around -30 of transcription start	core promoter element transcription start
BnGRP17-A10b	BnaA10g23960D	TATA-box	ATATAT	1125	6	-	Brassica napus	core promoter element around -30 of transcription start	core promoter element transcription start
BnGRP17-A10b	BnaA10g23960D	TATA-box	TATA	1126	4	-	Arabidopsis thaliana	core promoter element around -30 of transcription start	core promoter element transcription start
BnGRP17-A10b	BnaA10g23960D	TATA-box	TATTTAAA	1138	8	+	Arabidopsis thaliana	core promoter element around -30 of transcription start	core promoter element transcription start
BnGRP17-A10b	BnaA10g23960D	ARE	AAACCA	1143	6	+	Zea mays	cis-acting regulatory element essential for the anaerobic induction	anaerobic induction
BnGRP17-A10b	BnaA10g23960D	CAAT-box	CCAAT	1146	5	+	Arabidopsis thaliana	common cis-acting element in promoter and enhancer regions	promoter and enhancer regions
BnGRP17-A10b	BnaA10g23960D	TATA-box	TATA	1158	4	-	Arabidopsis thaliana	core promoter element around -30 of transcription start	core promoter element transcription start
BnGRP17-A10b	BnaA10g23960D	TATA-box	taTATAAAtc	1171	9	-	Arabidopsis thaliana	core promoter element around -30 of transcription start	core promoter element transcription start
BnGRP17-A10b	BnaA10g23960D	TATA-box	TATAAAA	1172	7	-	Pisum sativum	core promoter element around -30 of transcription start	core promoter element transcription start
BnGRP17-A10b	BnaA10g23960D	TATA-box	TATAAA	1173	6	-	Helianthus annuus	core promoter element around -30 of transcription start	core promoter element transcription start
BnGRP17-A10b	BnaA10g23960D	TATA-box	TATATAA	1174	7	-	Arabidopsis thaliana	core promoter element around -30 of transcription start	core promoter element transcription start
BnGRP17-A10b	BnaA10g23960D	TATA-box	TATATA	1175	6	-	Arabidopsis thaliana	core promoter element around -30 of transcription start	core promoter element transcription start
BnGRP17-A10b	BnaA10g23960D	TATA-box	TATA	1177	4	-	Arabidopsis thaliana	core promoter element around -30 of transcription start	core promoter element transcription start
BnGRP17-A10b	BnaA10g23960D	TATA-box	TATATTTATATTT	1185	12	-	Avena sativa	core promoter element around -30 of transcription start	core promoter element transcription start
BnGRP17-A10b	BnaA10g23960D	TATA-box	ATATAA	1193	6	+	Brassica oleracea	core promoter element around -30 of transcription start	core promoter element transcription start
BnGRP17-A10b	BnaA10g23960D	TATA-box	TATA	1194	4	-	Arabidopsis thaliana	core promoter element around -30 of transcription start	core promoter element transcription start
BnGRP17-A10b	BnaA10g23960D	TATA-box	ATATAT	1203	6	-	Brassica napus	core promoter element around -30 of transcription start	core promoter element transcription start
BnGRP17-A10b	BnaA10g23960D	TATA-box	TATATA	1204	6	-	Arabidopsis thaliana	core promoter element around -30 of transcription start	core promoter element transcription start
BnGRP17-A10b	BnaA10g23960D	TATA-box	ATATAA	1205	6	+	Brassica oleracea	core promoter element around -30 of transcription start	core promoter element transcription start
BnGRP17-A10b	BnaA10g23960D	TATA-box	TATA	1206	4	-	Arabidopsis thaliana	core promoter element around -30 of transcription start	core promoter element transcription start
BnGRP17-A10b	BnaA10g23960D	ATCT-motif	AATCTAATCC	1231	9	-	Pisum sativum	part of a conserved DNA module involved in light responsiveness	light response
BnGRP17-A10b	BnaA10g23960D	CAAT-box	CAAAT	1238	5	-	Pisum sativum	common cis-acting element in promoter and enhancer regions	promoter and enhancer regions
BnGRP17-A10b	BnaA10g23960D	CAAT-box	CAAAT	1270	5	-	Pisum sativum	common cis-acting element in promoter and enhancer regions	promoter and enhancer regions
BnGRP17-A10b	BnaA10g23960D		motif_sequence	1291	4	+	organism	short_function	short_function
BnGRP17-A10b	BnaA10g23960D	TATA-box	TATA	1308	4	-	Arabidopsis thaliana	core promoter element around -30 of transcription start	core promoter element transcription start
BnGRP17-A10b	BnaA10g23960D	LTR	CCGAAA	1313	6	-	Hordeum vulgare	cis-acting element involved in low-temperature responsiveness	low-temperature responsiveness
BnGRP17-A10b	BnaA10g23960D		motif_sequence	1332	4	+	organism	short_function	short_function
BnGRP17-A10b	BnaA10g23960D	CAAT-box	CAAAT	1379	5	+	Pisum sativum	common cis-acting element in promoter and enhancer regions	promoter and enhancer regions
BnGRP17-A10b	BnaA10g23960D	TATA-box	TATA	1403	4	-	Arabidopsis thaliana	core promoter element around -30 of transcription start	core promoter element transcription start
BnGRP17-A10b	BnaA10g23960D		motif_sequence	1422	4	-	organism	short_function	short_function
BnGRP17-A10b	BnaA10g23960D	GT1-motif	GGTTAA	1605	6	+	Arabidopsis thaliana	light responsive element	light response
BnGRP17-A10b	BnaA10g23960D	GT1-motif	GGTTAA	1642	6	+	Arabidopsis thaliana	light responsive element	light response
BnGRP17-A10b	BnaA10g23960D	TGA-element	AACGAC	1676	6	-	Brassica oleracea	auxin-responsive element	auxin responsive
BnGRP17-A10b	BnaA10g23960D	AE-box	AGAAACTT	1697	8	-	Arabidopsis thaliana	part of a module for light response	light response
BnGRP17-A10b	BnaA10g23960D	TATA-box	TAAAGATT	1704	8	+	Arabidopsis thaliana	core promoter element around -30 of transcription start	core promoter element transcription start
BnGRP17-A10b	BnaA10g23960D	AT-rich element	ATAGAAATCAA	1722	10	-	Glycine max	binding site of AT-rich DNA binding protein (ATBP-1)	AT-rich DNA binding protein (ATBP-1)
BnGRP17-A10b	BnaA10g23960D	TC-rich repeats	ATTCTCTAAC	1754	9	-	Nicotiana tabacum	cis-acting element involved in defense and stress responsiveness	defense and stress responsiveness
BnGRP17-A10b	BnaA10g23960D		motif_sequence	1770	4	-	organism	short_function	short_function
BnGRP17-A10b	BnaA10g23960D	G-box	CACGAC	1806	6	-	Zea mays	cis-acting regulatory element involved in light responsiveness	light response
BnGRP17-A10b	BnaA10g23960D	AE-box	AGAAACAA	1826	8	+	Arabidopsis thaliana	part of a module for light response	light response
BnGRP17-A10b	BnaA10g23960D	CAAT-box	CAAAT	1831	5	+	Pisum sativum	common cis-acting element in promoter and enhancer regions	promoter and enhancer regions
BnGRP17-A10b	BnaA10g23960D	CGTCA-motif	CGTCA	1852	5	-	Hordeum vulgare	cis-acting regulatory element involved in the MeJA-responsiveness	MeJA-responsiveness
BnGRP17-A10b	BnaA10g23960D	TGACG-motif	TGACG	1852	5	+	Hordeum vulgare	cis-acting regulatory element involved in the MeJA-responsiveness	MeJA-responsiveness
BnGRP17-A10b	BnaA10g23960D	CGTCA-motif	CGTCA	1882	5	-	Hordeum vulgare	cis-acting regulatory element involved in the MeJA-responsiveness	MeJA-responsiveness
BnGRP17-A10b	BnaA10g23960D	TGACG-motif	TGACG	1882	5	+	Hordeum vulgare	cis-acting regulatory element involved in the MeJA-responsiveness	MeJA-responsiveness
BnGRP17-A10b	BnaA10g23960D	G-box	CACGTC	1883	6	-	Zea mays	cis-acting regulatory element involved in light responsiveness	light response
BnGRP17-A10b	BnaA10g23960D	ABRE	ACGTG	1884	5	+	Arabidopsis thaliana	cis-acting element involved in the abscisic acid responsiveness	abscisic acid responsiveness
BnGRP17-A10b	BnaA10g23960D	CGTCA-motif	CGTCA	1887	5	-	Hordeum vulgare	cis-acting regulatory element involved in the MeJA-responsiveness	MeJA-responsiveness
BnGRP17-A10b	BnaA10g23960D	TGACG-motif	TGACG	1887	5	+	Hordeum vulgare	cis-acting regulatory element involved in the MeJA-responsiveness	MeJA-responsiveness
BnGRP17-A10b	BnaA10g23960D		motif_sequence	1901	4	-	organism	short_function	short_function
BnGRP17-A10b	BnaA10g23960D	CAAT-box	CAAAT	1911	5	-	Pisum sativum	common cis-acting element in promoter and enhancer regions	promoter and enhancer regions
BnGRP17-A10b	BnaA10g23960D		motif_sequence	1931	4	+	organism	short_function	short_function
BnGRP17-A10b	BnaA10g23960D		motif_sequence	1933	4	-	organism	short_function	short_function
BnGRP17-A10b	BnaA10g23960D	TATA-box	ATATAT	1943	6	-	Brassica napus	core promoter element around -30 of transcription start	core promoter element transcription start
BnGRP17-A10b	BnaA10g23960D	TATA-box	TATATA	1944	6	-	Arabidopsis thaliana	core promoter element around -30 of transcription start	core promoter element transcription start
BnGRP17-A10b	BnaA10g23960D	TATA-box	ATATAA	1945	6	+	Brassica oleracea	core promoter element around -30 of transcription start	core promoter element transcription start
BnGRP17-A10b	BnaA10g23960D	TATA-box	TATA	1946	4	-	Arabidopsis thaliana	core promoter element around -30 of transcription start	core promoter element transcription start
BnGRP17-A10b	BnaA10g23960D		motif_sequence	1958	4	+	organism	short_function	short_function
BnGRP17-A10b	BnaA10g23960D		motif_sequence	1968	4	+	organism	short_function	short_function
BnGRP17-A10b	BnaA10g23960D	CAAT-box	CCAAT	1973	5	+	Arabidopsis thaliana	common cis-acting element in promoter and enhancer regions	promoter and enhancer regions
BnGRP17-A10b	BnaA10g23960D	CAAT-box	CCAAT	1988	5	+	Arabidopsis thaliana	common cis-acting element in promoter and enhancer regions	promoter and enhancer regions
BnGRP18-A08	BnaA08g22860D	ABRE	CGCACGTGTC	62	9	+	Hordeum vulgare	cis-acting element involved in the abscisic acid responsiveness	abscisic acid responsiveness
BnGRP18-A08	BnaA08g22860D	G-box	CACGTG	64	6	+	Arabidopsis thaliana	cis-acting regulatory element involved in light responsiveness	light response
BnGRP18-A08	BnaA08g22860D	ABRE	CACGTG	64	6	+	Arabidopsis thaliana	cis-acting element involved in the abscisic acid responsiveness	abscisic acid responsiveness
BnGRP18-A08	BnaA08g22860D	ABRE	ACGTG	65	5	+	Arabidopsis thaliana	cis-acting element involved in the abscisic acid responsiveness	abscisic acid responsiveness
BnGRP18-A08	BnaA08g22860D	TATA-box	ATATAT	91	6	+	Brassica napus	core promoter element around -30 of transcription start	core promoter element transcription start
BnGRP18-A08	BnaA08g22860D	TATA-box	TATA	92	4	+	Arabidopsis thaliana	core promoter element around -30 of transcription start	core promoter element transcription start
BnGRP18-A08	BnaA08g22860D	AT-rich element	ATAGAAATCAA	133	10	-	Glycine max	binding site of AT-rich DNA binding protein (ATBP-1)	AT-rich DNA binding protein (ATBP-1)
BnGRP18-A08	BnaA08g22860D	ARE	AAACCA	134	6	-	Zea mays	cis-acting regulatory element essential for the anaerobic induction	anaerobic induction
BnGRP18-A08	BnaA08g22860D		motif_sequence	169	4	+	organism	short_function	short_function
BnGRP18-A08	BnaA08g22860D		motif_sequence	193	4	+	organism	short_function	short_function
BnGRP18-A08	BnaA08g22860D	ACE	CTAACGTATT	220	9	+	Petroselinum crispum	cis-acting element involved in light responsiveness	light response
BnGRP18-A08	BnaA08g22860D	CAAT-box	CCAAT	239	5	-	Arabidopsis thaliana	common cis-acting element in promoter and enhancer regions	promoter and enhancer regions
BnGRP18-A08	BnaA08g22860D	ARE	AAACCA	241	6	-	Zea mays	cis-acting regulatory element essential for the anaerobic induction	anaerobic induction
BnGRP18-A08	BnaA08g22860D		motif_sequence	263	4	+	organism	short_function	short_function
BnGRP18-A08	BnaA08g22860D	CAAT-box	CAAAT	308	5	+	Pisum sativum	common cis-acting element in promoter and enhancer regions	promoter and enhancer regions
BnGRP18-A08	BnaA08g22860D	GATA-motif	AAGATAAGATT	310	10	-	Arabidopsis thaliana	part of a light responsive element	light response
BnGRP18-A08	BnaA08g22860D		motif_sequence	316	4	+	organism	short_function	short_function
BnGRP18-A08	BnaA08g22860D	TATA-box	TATATA	326	6	+	Arabidopsis thaliana	core promoter element around -30 of transcription start	core promoter element transcription start
BnGRP18-A08	BnaA08g22860D	TATA-box	ATATAA	327	6	+	Brassica oleracea	core promoter element around -30 of transcription start	core promoter element transcription start
BnGRP18-A08	BnaA08g22860D	TATA-box	TATA	328	4	+	Arabidopsis thaliana	core promoter element around -30 of transcription start	core promoter element transcription start
BnGRP18-A08	BnaA08g22860D	TATA-box	TATA	343	4	+	Arabidopsis thaliana	core promoter element around -30 of transcription start	core promoter element transcription start
BnGRP18-A08	BnaA08g22860D	GT1-motif	GGTTAA	350	6	-	Arabidopsis thaliana	light responsive element	light response
BnGRP18-A08	BnaA08g22860D	CAAT-box	CAAAT	373	5	-	Pisum sativum	common cis-acting element in promoter and enhancer regions	promoter and enhancer regions
BnGRP18-A08	BnaA08g22860D	MBS	CAACTG	391	6	-	Arabidopsis thaliana	MYB binding site involved in drought-inducibility	MYB binding site
BnGRP18-A08	BnaA08g22860D	TATA-box	TATATAA	397	7	-	Arabidopsis thaliana	core promoter element around -30 of transcription start	core promoter element transcription start
BnGRP18-A08	BnaA08g22860D	TATA-box	TATATA	398	6	+	Arabidopsis thaliana	core promoter element around -30 of transcription start	core promoter element transcription start
BnGRP18-A08	BnaA08g22860D	TATA-box	ATATAT	399	6	+	Brassica napus	core promoter element around -30 of transcription start	core promoter element transcription start
BnGRP18-A08	BnaA08g22860D	TATA-box	TATA	400	4	+	Arabidopsis thaliana	core promoter element around -30 of transcription start	core promoter element transcription start
BnGRP18-A08	BnaA08g22860D	ACA-motif	AATCACAACCATA	402	12	-	Arabidopsis thaliana	part of gapA in (gapA-CMA1) involved with light responsiveness	light response
BnGRP18-A08	BnaA08g22860D	AAAC-motif	CAATCAAAACCT	404	11	-	Spinacia oleracea	light responsive element	light response
BnGRP18-A08	BnaA08g22860D	ARE	AAACCA	404	6	-	Zea mays	cis-acting regulatory element essential for the anaerobic induction	anaerobic induction
BnGRP18-A08	BnaA08g22860D	P-box	CCTTTTG	436	7	-	Oryza sativa	gibberellin-responsive element	gibberellin-responsive
BnGRP18-A08	BnaA08g22860D	CAAT-box	CCAAT	472	5	+	Arabidopsis thaliana	common cis-acting element in promoter and enhancer regions	promoter and enhancer regions
BnGRP18-A08	BnaA08g22860D	GT1-motif	GGTTAA	477	6	-	Arabidopsis thaliana	light responsive element	light response
BnGRP18-A08	BnaA08g22860D	MRE	AACCTAA	505	7	-	Petroselinum crispum	MYB binding site involved in light responsiveness	MYB binding site
BnGRP18-A08	BnaA08g22860D		motif_sequence	560	4	-	organism	short_function	short_function
BnGRP18-A08	BnaA08g22860D		motif_sequence	571	4	-	organism	short_function	short_function
BnGRP18-A08	BnaA08g22860D		motif_sequence	611	4	-	organism	short_function	short_function
BnGRP18-A08	BnaA08g22860D		motif_sequence	629	4	-	organism	short_function	short_function
BnGRP18-A08	BnaA08g22860D		motif_sequence	666	4	+	organism	short_function	short_function
BnGRP18-A08	BnaA08g22860D	TCCC-motif	TCTCCCT	702	7	+	Spinacia oleracea	part of a light responsive element	light response
BnGRP18-A08	BnaA08g22860D	ARE	AAACCA	735	6	-	Zea mays	cis-acting regulatory element essential for the anaerobic induction	anaerobic induction
BnGRP18-A08	BnaA08g22860D	ARE	AAACCA	761	6	-	Zea mays	cis-acting regulatory element essential for the anaerobic induction	anaerobic induction
BnGRP18-A08	BnaA08g22860D		motif_sequence	807	4	-	organism	short_function	short_function
BnGRP18-A08	BnaA08g22860D		motif_sequence	892	4	-	organism	short_function	short_function
BnGRP18-A08	BnaA08g22860D	TATA-box	ATATAA	896	6	+	Brassica oleracea	core promoter element around -30 of transcription start	core promoter element transcription start
BnGRP18-A08	BnaA08g22860D	TATA-box	TATA	897	4	+	Arabidopsis thaliana	core promoter element around -30 of transcription start	core promoter element transcription start
BnGRP18-A08	BnaA08g22860D		motif_sequence	901	4	+	organism	short_function	short_function
BnGRP18-A08	BnaA08g22860D	Box 4	ATTAAT	916	6	+	Petroselinum crispum	part of a conserved DNA module involved in light responsiveness	light response
BnGRP18-A08	BnaA08g22860D	TATA-box	TACAAAA	924	7	-	Oryza sativa	core promoter element around -30 of transcription start	core promoter element transcription start
BnGRP18-A08	BnaA08g22860D	TATA-box	TATACA	927	6	-	Helianthus annuus	core promoter element around -30 of transcription start	core promoter element transcription start
BnGRP18-A08	BnaA08g22860D	TATA-box	TATA	929	4	+	Arabidopsis thaliana	core promoter element around -30 of transcription start	core promoter element transcription start
BnGRP18-A08	BnaA08g22860D		motif_sequence	979	4	-	organism	short_function	short_function
BnGRP18-A08	BnaA08g22860D	MRE	AACCTAA	1134	7	-	Petroselinum crispum	MYB binding site involved in light responsiveness	MYB binding site
BnGRP18-A08	BnaA08g22860D	ARE	AAACCA	1142	6	-	Zea mays	cis-acting regulatory element essential for the anaerobic induction	anaerobic induction
BnGRP18-A08	BnaA08g22860D		motif_sequence	1156	4	+	organism	short_function	short_function
BnGRP18-A08	BnaA08g22860D	CAAT-box	CCAAT	1182	5	-	Arabidopsis thaliana	common cis-acting element in promoter and enhancer regions	promoter and enhancer regions
BnGRP18-A08	BnaA08g22860D	O2-site	GTTGACGTGA	1194	9	-	Zea mays	cis-acting regulatory element involved in zein metabolism regulation	zein metabolism regulation
BnGRP18-A08	BnaA08g22860D		motif_sequence	1335	4	-	organism	short_function	short_function
BnGRP18-A08	BnaA08g22860D	I-box	AGATAAGG	1339	8	+	Triticum aestivum	part of a light responsive element	light response
BnGRP18-A08	BnaA08g22860D		motif_sequence	1345	4	-	organism	short_function	short_function
BnGRP18-A08	BnaA08g22860D		motif_sequence	1365	4	-	organism	short_function	short_function
BnGRP18-A08	BnaA08g22860D	TGA-element	AACGAC	1393	6	+	Brassica oleracea	auxin-responsive element	auxin responsive
BnGRP18-A08	BnaA08g22860D		motif_sequence	1416	4	-	organism	short_function	short_function
BnGRP18-A08	BnaA08g22860D	GT1-motif	GGTTAA	1421	6	+	Arabidopsis thaliana	light responsive element	light response
BnGRP18-A08	BnaA08g22860D	GT1-motif	GGTTAA	1423	6	-	Arabidopsis thaliana	light responsive element	light response
BnGRP18-A08	BnaA08g22860D	chs-CMA1a	TTACTTAA	1431	8	+	Daucus carota	part of a light responsive element	light response
BnGRP18-A08	BnaA08g22860D	CAAT-box	CAAAT	1469	5	+	Pisum sativum	common cis-acting element in promoter and enhancer regions	promoter and enhancer regions
BnGRP18-A08	BnaA08g22860D	TATC-box	TATCCCA	1605	7	-	Oryza sativa	cis-acting element involved in gibberellin-responsiveness	gibberellin-responsive
BnGRP18-A08	BnaA08g22860D	G-box	TAAACGTG	1653	8	+	Brassica oleracea	cis-acting regulatory element involved in light responsiveness	light response
BnGRP18-A08	BnaA08g22860D	G-box	CACGTT	1655	6	-	Pisum sativum	cis-acting regulatory element involved in light responsiveness	light response
BnGRP18-A08	BnaA08g22860D	ABRE	ACGTG	1656	5	+	Arabidopsis thaliana	cis-acting element involved in the abscisic acid responsiveness	abscisic acid responsiveness
BnGRP18-A08	BnaA08g22860D	CAAT-box	CAAAT	1671	5	+	Pisum sativum	common cis-acting element in promoter and enhancer regions	promoter and enhancer regions
BnGRP18-A08	BnaA08g22860D		motif_sequence	1714	4	+	organism	short_function	short_function
BnGRP18-A08	BnaA08g22860D		motif_sequence	1726	4	+	organism	short_function	short_function
BnGRP18-A08	BnaA08g22860D	Box 4	ATTAAT	1778	6	-	Petroselinum crispum	part of a conserved DNA module involved in light responsiveness	light response
BnGRP18-A08	BnaA08g22860D	TCA-element	CCATCTTTTT	1844	9	-	Nicotiana tabacum	cis-acting element involved in salicylic acid responsiveness	salicylic acid responsiveness
BnGRP18-A08	BnaA08g22860D	CGTCA-motif	CGTCA	1864	5	-	Hordeum vulgare	cis-acting regulatory element involved in the MeJA-responsiveness	MeJA-responsiveness
BnGRP18-A08	BnaA08g22860D	TGACG-motif	TGACG	1864	5	+	Hordeum vulgare	cis-acting regulatory element involved in the MeJA-responsiveness	MeJA-responsiveness
BnGRP18-A08	BnaA08g22860D	G-box	CACGTC	1865	6	-	Zea mays	cis-acting regulatory element involved in light responsiveness	light response
BnGRP18-A08	BnaA08g22860D	ABRE	ACGTG	1866	5	+	Arabidopsis thaliana	cis-acting element involved in the abscisic acid responsiveness	abscisic acid responsiveness
BnGRP18-A08	BnaA08g22860D	ABRE	ACGTG	1895	5	-	Arabidopsis thaliana	cis-acting element involved in the abscisic acid responsiveness	abscisic acid responsiveness
BnGRP18-A08	BnaA08g22860D	G-box	CACGTC	1895	6	+	Zea mays	cis-acting regulatory element involved in light responsiveness	light response
BnGRP18-A08	BnaA08g22860D	TGA-element	AACGAC	1898	6	-	Brassica oleracea	auxin-responsive element	auxin responsive
BnGRP18-A08	BnaA08g22860D	CAAT-box	CAAAT	1979	5	+	Pisum sativum	common cis-acting element in promoter and enhancer regions	promoter and enhancer regions
BnGRP14-C09	BnaC09g47930D	TATA-box	TACAAAA	2	7	-	Oryza sativa	core promoter element around -30 of transcription start	core promoter element transcription start
BnGRP14-C09	BnaC09g47930D	TATA-box	TATA	13	4	+	Arabidopsis thaliana	core promoter element around -30 of transcription start	core promoter element transcription start
BnGRP14-C09	BnaC09g47930D	TATA-box	ATTATA	35	6	+	Brassica napus	core promoter element around -30 of transcription start	core promoter element transcription start
BnGRP14-C09	BnaC09g47930D	TATA-box	TATATAA	36	7	-	Arabidopsis thaliana	core promoter element around -30 of transcription start	core promoter element transcription start
BnGRP14-C09	BnaC09g47930D	TATA-box	TATATA	37	6	+	Arabidopsis thaliana	core promoter element around -30 of transcription start	core promoter element transcription start
BnGRP14-C09	BnaC09g47930D	TATA-box	ATATAT	38	6	+	Brassica napus	core promoter element around -30 of transcription start	core promoter element transcription start
BnGRP14-C09	BnaC09g47930D	TATA-box	TATATA	39	6	+	Arabidopsis thaliana	core promoter element around -30 of transcription start	core promoter element transcription start
BnGRP14-C09	BnaC09g47930D	TATA-box	ATATAT	40	6	+	Brassica napus	core promoter element around -30 of transcription start	core promoter element transcription start
BnGRP14-C09	BnaC09g47930D	TATA-box	TATATTTATATTT	41	12	+	Avena sativa	core promoter element around -30 of transcription start	core promoter element transcription start
BnGRP14-C09	BnaC09g47930D	TATA-box	TATAAAA	70	7	-	Pisum sativum	core promoter element around -30 of transcription start	core promoter element transcription start
BnGRP14-C09	BnaC09g47930D	TATA-box	TATAAA	71	6	-	Helianthus annuus	core promoter element around -30 of transcription start	core promoter element transcription start
BnGRP14-C09	BnaC09g47930D	TATA-box	TATATAA	72	7	-	Arabidopsis thaliana	core promoter element around -30 of transcription start	core promoter element transcription start
BnGRP14-C09	BnaC09g47930D	TATA-box	TATATA	73	6	+	Arabidopsis thaliana	core promoter element around -30 of transcription start	core promoter element transcription start
BnGRP14-C09	BnaC09g47930D	TATA-box	ATATAT	74	6	+	Brassica napus	core promoter element around -30 of transcription start	core promoter element transcription start
BnGRP14-C09	BnaC09g47930D	TATA-box	TATATA	75	6	+	Arabidopsis thaliana	core promoter element around -30 of transcription start	core promoter element transcription start
BnGRP14-C09	BnaC09g47930D	TATA-box	ATATAT	76	6	+	Brassica napus	core promoter element around -30 of transcription start	core promoter element transcription start
BnGRP14-C09	BnaC09g47930D	TATA-box	TATA	77	4	+	Arabidopsis thaliana	core promoter element around -30 of transcription start	core promoter element transcription start
BnGRP14-C09	BnaC09g47930D	Box 4	ATTAAT	80	6	+	Petroselinum crispum	part of a conserved DNA module involved in light responsiveness	light response
BnGRP14-C09	BnaC09g47930D	Box 4	ATTAAT	86	6	+	Petroselinum crispum	part of a conserved DNA module involved in light responsiveness	light response
BnGRP14-C09	BnaC09g47930D	CAAT-box	CAAAT	112	5	+	Pisum sativum	common cis-acting element in promoter and enhancer regions	promoter and enhancer regions
BnGRP14-C09	BnaC09g47930D	circadian	CAAAGATATC	153	9	+	Lycopersicon esculentum	cis-acting regulatory element involved in circadian control	circadian control
BnGRP14-C09	BnaC09g47930D	A-box	CCGTCC	272	6	+	Petroselinum crispum	cis-acting regulatory element	cis-acting regulatory element
BnGRP14-C09	BnaC09g47930D	TATA-box	TATAAAA	311	7	-	Pisum sativum	core promoter element around -30 of transcription start	core promoter element transcription start
BnGRP14-C09	BnaC09g47930D	TATA-box	TATAAA	312	6	-	Helianthus annuus	core promoter element around -30 of transcription start	core promoter element transcription start
BnGRP14-C09	BnaC09g47930D	TATA-box	TATAA	313	5	-	Arabidopsis thaliana	core promoter element around -30 of transcription start	core promoter element transcription start
BnGRP14-C09	BnaC09g47930D	TATA-box	TATA	314	4	+	Arabidopsis thaliana	core promoter element around -30 of transcription start	core promoter element transcription start
BnGRP14-C09	BnaC09g47930D	TATA-box	TATAAAT	338	7	-	Brassica juncea	core promoter element around -30 of transcription start	core promoter element transcription start
BnGRP14-C09	BnaC09g47930D	TATA-box	TATAAA	339	6	-	Helianthus annuus	core promoter element around -30 of transcription start	core promoter element transcription start
BnGRP14-C09	BnaC09g47930D	TATA-box	TATAA	340	5	-	Arabidopsis thaliana	core promoter element around -30 of transcription start	core promoter element transcription start
BnGRP14-C09	BnaC09g47930D	TATA-box	TATA	341	4	+	Arabidopsis thaliana	core promoter element around -30 of transcription start	core promoter element transcription start
BnGRP14-C09	BnaC09g47930D	TATA-box	TATAAAA	351	7	-	Pisum sativum	core promoter element around -30 of transcription start	core promoter element transcription start
BnGRP14-C09	BnaC09g47930D	TATA-box	TATAAA	352	6	-	Helianthus annuus	core promoter element around -30 of transcription start	core promoter element transcription start
BnGRP14-C09	BnaC09g47930D	TATA-box	TATAA	353	5	-	Arabidopsis thaliana	core promoter element around -30 of transcription start	core promoter element transcription start
BnGRP14-C09	BnaC09g47930D	TATA-box	TATA	354	4	+	Arabidopsis thaliana	core promoter element around -30 of transcription start	core promoter element transcription start
BnGRP14-C09	BnaC09g47930D	TATA-box	TATATA	391	6	+	Arabidopsis thaliana	core promoter element around -30 of transcription start	core promoter element transcription start
BnGRP14-C09	BnaC09g47930D	TATA-box	ATATAT	392	6	+	Brassica napus	core promoter element around -30 of transcription start	core promoter element transcription start
BnGRP14-C09	BnaC09g47930D	TATA-box	TATATA	393	6	+	Arabidopsis thaliana	core promoter element around -30 of transcription start	core promoter element transcription start
BnGRP14-C09	BnaC09g47930D	TATA-box	ATATAT	394	6	+	Brassica napus	core promoter element around -30 of transcription start	core promoter element transcription start
BnGRP14-C09	BnaC09g47930D	TATA-box	TATATA	395	6	+	Arabidopsis thaliana	core promoter element around -30 of transcription start	core promoter element transcription start
BnGRP14-C09	BnaC09g47930D	TATA-box	ATATAT	396	6	+	Brassica napus	core promoter element around -30 of transcription start	core promoter element transcription start
BnGRP14-C09	BnaC09g47930D	TATA-box	TATA	397	4	+	Arabidopsis thaliana	core promoter element around -30 of transcription start	core promoter element transcription start
BnGRP14-C09	BnaC09g47930D	CAAT-box	CAAAT	403	5	-	Pisum sativum	common cis-acting element in promoter and enhancer regions	promoter and enhancer regions
BnGRP14-C09	BnaC09g47930D	CAAT-box	CAAAT	446	5	-	Pisum sativum	common cis-acting element in promoter and enhancer regions	promoter and enhancer regions
BnGRP14-C09	BnaC09g47930D	TATA-box	ccTATAAAaa	529	9	-	Arabidopsis thaliana	core promoter element around -30 of transcription start	core promoter element transcription start
BnGRP14-C09	BnaC09g47930D	TATA-box	ATTATA	560	6	+	Brassica napus	core promoter element around -30 of transcription start	core promoter element transcription start
BnGRP14-C09	BnaC09g47930D	TATA-box	TATAA	561	5	-	Arabidopsis thaliana	core promoter element around -30 of transcription start	core promoter element transcription start
BnGRP14-C09	BnaC09g47930D	TATA-box	TATA	562	4	+	Arabidopsis thaliana	core promoter element around -30 of transcription start	core promoter element transcription start
BnGRP14-C09	BnaC09g47930D	TATA-box	TATAAAA	569	7	-	Pisum sativum	core promoter element around -30 of transcription start	core promoter element transcription start
BnGRP14-C09	BnaC09g47930D	TATA-box	TATAAA	570	6	-	Helianthus annuus	core promoter element around -30 of transcription start	core promoter element transcription start
BnGRP14-C09	BnaC09g47930D	TATA-box	TATAA	571	5	-	Arabidopsis thaliana	core promoter element around -30 of transcription start	core promoter element transcription start
BnGRP14-C09	BnaC09g47930D	TATA-box	TATA	572	4	+	Arabidopsis thaliana	core promoter element around -30 of transcription start	core promoter element transcription start
BnGRP14-C09	BnaC09g47930D	Box 4	ATTAAT	576	6	+	Petroselinum crispum	part of a conserved DNA module involved in light responsiveness	light response
BnGRP14-C09	BnaC09g47930D	TATA-box	TACAAAA	596	7	-	Oryza sativa	core promoter element around -30 of transcription start	core promoter element transcription start
BnGRP14-C09	BnaC09g47930D	TATA-box	TATA	616	4	+	Arabidopsis thaliana	core promoter element around -30 of transcription start	core promoter element transcription start
BnGRP14-C09	BnaC09g47930D	Box 4	ATTAAT	650	6	+	Petroselinum crispum	part of a conserved DNA module involved in light responsiveness	light response
BnGRP14-C09	BnaC09g47930D	TCA-element	CCATCTTTTT	668	9	-	Nicotiana tabacum	cis-acting element involved in salicylic acid responsiveness	salicylic acid responsiveness
BnGRP14-C09	BnaC09g47930D	TCA-element	CCATCTTTTT	698	9	+	Nicotiana tabacum	cis-acting element involved in salicylic acid responsiveness	salicylic acid responsiveness
BnGRP14-C09	BnaC09g47930D	AT-rich element	ATAGAAATCAA	769	10	-	Glycine max	binding site of AT-rich DNA binding protein (ATBP-1)	AT-rich DNA binding protein (ATBP-1)
BnGRP14-C09	BnaC09g47930D	TATA-box	taTATAAAtc	771	9	-	Arabidopsis thaliana	core promoter element around -30 of transcription start	core promoter element transcription start
BnGRP14-C09	BnaC09g47930D	TATA-box	TATA	777	4	+	Arabidopsis thaliana	core promoter element around -30 of transcription start	core promoter element transcription start
BnGRP14-C09	BnaC09g47930D		motif_sequence	861	4	-	organism	short_function	short_function
BnGRP14-C09	BnaC09g47930D	TATA-box	TATACA	880	6	-	Helianthus annuus	core promoter element around -30 of transcription start	core promoter element transcription start
BnGRP14-C09	BnaC09g47930D	TATA-box	TATA	882	4	+	Arabidopsis thaliana	core promoter element around -30 of transcription start	core promoter element transcription start
BnGRP14-C09	BnaC09g47930D	CGTCA-motif	CGTCA	898	5	-	Hordeum vulgare	cis-acting regulatory element involved in the MeJA-responsiveness	MeJA-responsiveness
BnGRP14-C09	BnaC09g47930D	TGACG-motif	TGACG	898	5	+	Hordeum vulgare	cis-acting regulatory element involved in the MeJA-responsiveness	MeJA-responsiveness
BnGRP14-C09	BnaC09g47930D	CAAT-box	CAAAT	927	5	+	Pisum sativum	common cis-acting element in promoter and enhancer regions	promoter and enhancer regions
BnGRP14-C09	BnaC09g47930D	CAAT-box	CAAAT	983	5	+	Pisum sativum	common cis-acting element in promoter and enhancer regions	promoter and enhancer regions
BnGRP14-C09	BnaC09g47930D		motif_sequence	1001	4	-	organism	short_function	short_function
BnGRP14-C09	BnaC09g47930D	Box 4	ATTAAT	1015	6	-	Petroselinum crispum	part of a conserved DNA module involved in light responsiveness	light response
BnGRP14-C09	BnaC09g47930D	CAAT-box	CCAAT	1022	5	-	Arabidopsis thaliana	common cis-acting element in promoter and enhancer regions	promoter and enhancer regions
BnGRP14-C09	BnaC09g47930D		motif_sequence	1035	4	-	organism	short_function	short_function
BnGRP14-C09	BnaC09g47930D		motif_sequence	1044	4	+	organism	short_function	short_function
BnGRP14-C09	BnaC09g47930D		motif_sequence	1046	4	-	organism	short_function	short_function
BnGRP14-C09	BnaC09g47930D		motif_sequence	1062	4	+	organism	short_function	short_function
BnGRP14-C09	BnaC09g47930D	TATA-box	TATATA	1071	6	-	Arabidopsis thaliana	core promoter element around -30 of transcription start	core promoter element transcription start
BnGRP14-C09	BnaC09g47930D	TATA-box	ATATAT	1072	6	-	Brassica napus	core promoter element around -30 of transcription start	core promoter element transcription start
BnGRP14-C09	BnaC09g47930D	TATA-box	TATA	1073	4	-	Arabidopsis thaliana	core promoter element around -30 of transcription start	core promoter element transcription start
BnGRP14-C09	BnaC09g47930D	TATA-box	TACAAAA	1171	7	-	Oryza sativa	core promoter element around -30 of transcription start	core promoter element transcription start
BnGRP14-C09	BnaC09g47930D	TATA-box	taTATAAAtc	1200	10	-	Arabidopsis thaliana	core promoter element around -30 of transcription start	core promoter element transcription start
BnGRP14-C09	BnaC09g47930D	TATA-box	TATAAAT	1201	7	-	Brassica juncea	core promoter element around -30 of transcription start	core promoter element transcription start
BnGRP14-C09	BnaC09g47930D	TATA-box	TATAAA	1202	6	-	Helianthus annuus	core promoter element around -30 of transcription start	core promoter element transcription start
BnGRP14-C09	BnaC09g47930D	TATA-box	TATATAA	1203	7	-	Arabidopsis thaliana	core promoter element around -30 of transcription start	core promoter element transcription start
BnGRP14-C09	BnaC09g47930D	TATA-box	TATATA	1204	6	-	Arabidopsis thaliana	core promoter element around -30 of transcription start	core promoter element transcription start
BnGRP14-C09	BnaC09g47930D	TATA-box	ATATAT	1205	6	-	Brassica napus	core promoter element around -30 of transcription start	core promoter element transcription start
BnGRP14-C09	BnaC09g47930D	TATA-box	TATATA	1206	6	-	Arabidopsis thaliana	core promoter element around -30 of transcription start	core promoter element transcription start
BnGRP14-C09	BnaC09g47930D	TATA-box	ATATAT	1207	6	-	Brassica napus	core promoter element around -30 of transcription start	core promoter element transcription start
BnGRP14-C09	BnaC09g47930D	TATA-box	TATATA	1208	6	-	Arabidopsis thaliana	core promoter element around -30 of transcription start	core promoter element transcription start
BnGRP14-C09	BnaC09g47930D	TATA-box	ATATAT	1209	6	-	Brassica napus	core promoter element around -30 of transcription start	core promoter element transcription start
BnGRP14-C09	BnaC09g47930D	TATA-box	TATA	1210	4	-	Arabidopsis thaliana	core promoter element around -30 of transcription start	core promoter element transcription start
BnGRP14-C09	BnaC09g47930D		motif_sequence	1263	4	+	organism	short_function	short_function
BnGRP14-C09	BnaC09g47930D		motif_sequence	1423	4	+	organism	short_function	short_function
BnGRP14-C09	BnaC09g47930D	TATA-box	TACAAAA	1426	7	+	Oryza sativa	core promoter element around -30 of transcription start	core promoter element transcription start
BnGRP14-C09	BnaC09g47930D		motif_sequence	1489	4	+	organism	short_function	short_function
BnGRP14-C09	BnaC09g47930D	CAAT-box	CAAAT	1512	5	+	Pisum sativum	common cis-acting element in promoter and enhancer regions	promoter and enhancer regions
BnGRP14-C09	BnaC09g47930D		motif_sequence	1519	4	+	organism	short_function	short_function
BnGRP14-C09	BnaC09g47930D	ATCT-motif	AATCTAATCC	1525	9	-	Pisum sativum	part of a conserved DNA module involved in light responsiveness	light response
BnGRP14-C09	BnaC09g47930D	TATA-box	ATATAA	1547	6	+	Brassica oleracea	core promoter element around -30 of transcription start	core promoter element transcription start
BnGRP14-C09	BnaC09g47930D	TATA-box	TATA	1548	4	-	Arabidopsis thaliana	core promoter element around -30 of transcription start	core promoter element transcription start
BnGRP14-C09	BnaC09g47930D		motif_sequence	1590	4	-	organism	short_function	short_function
BnGRP14-C09	BnaC09g47930D	LTR	CCGAAA	1632	6	-	Hordeum vulgare	cis-acting element involved in low-temperature responsiveness	low-temperature responsiveness
BnGRP14-C09	BnaC09g47930D		motif_sequence	1722	4	+	organism	short_function	short_function
BnGRP14-C09	BnaC09g47930D	ARE	AAACCA	1737	6	-	Zea mays	cis-acting regulatory element essential for the anaerobic induction	anaerobic induction
BnGRP14-C09	BnaC09g47930D	MBSI	TTTTTACGGTTA	1761	11	-	Petunia hybrida	MYB binding site involved in flavonoid biosynthetic genes regulation	MYB binding site
BnGRP14-C09	BnaC09g47930D		motif_sequence	1862	4	-	organism	short_function	short_function
BnGRP14-C09	BnaC09g47930D	CGTCA-motif	CGTCA	1872	5	-	Hordeum vulgare	cis-acting regulatory element involved in the MeJA-responsiveness	MeJA-responsiveness
BnGRP14-C09	BnaC09g47930D	TGACG-motif	TGACG	1872	5	+	Hordeum vulgare	cis-acting regulatory element involved in the MeJA-responsiveness	MeJA-responsiveness
BnGRP14-C09	BnaC09g47930D	G-box	CACGTC	1873	6	-	Zea mays	cis-acting regulatory element involved in light responsiveness	light response
BnGRP14-C09	BnaC09g47930D	ABRE	ACGTG	1874	5	+	Arabidopsis thaliana	cis-acting element involved in the abscisic acid responsiveness	abscisic acid responsiveness
BnGRP14-C09	BnaC09g47930D	TGACG-motif	TGACG	1877	5	+	Hordeum vulgare	cis-acting regulatory element involved in the MeJA-responsiveness	MeJA-responsiveness
BnGRP14-C09	BnaC09g47930D	TGA-box	TGACGTAA	1877	8	+	Glycine max	part of an auxin-responsive element	auxin responsive
BnGRP14-C09	BnaC09g47930D	CGTCA-motif	CGTCA	1877	5	-	Hordeum vulgare	cis-acting regulatory element involved in the MeJA-responsiveness	MeJA-responsiveness
BnGRP14-C09	BnaC09g47930D		motif_sequence	1891	4	-	organism	short_function	short_function
BnGRP14-C09	BnaC09g47930D	TCT-motif	TCTTAC	1898	6	+	Arabidopsis thaliana	part of a light responsive element	light response
BnGRP14-C09	BnaC09g47930D	ABRE	ACGTG	1909	5	-	Arabidopsis thaliana	cis-acting element involved in the abscisic acid responsiveness	abscisic acid responsiveness
BnGRP14-C09	BnaC09g47930D	G-box	CACGTC	1909	6	+	Zea mays	cis-acting regulatory element involved in light responsiveness	light response
BnGRP14-C09	BnaC09g47930D	TGA-element	AACGAC	1912	6	-	Brassica oleracea	auxin-responsive element	auxin responsive
BnGRP14-C09	BnaC09g47930D		motif_sequence	1918	4	-	organism	short_function	short_function
BnGRP14-C09	BnaC09g47930D	CAAT-box	CAAAT	1979	5	+	Pisum sativum	common cis-acting element in promoter and enhancer regions	promoter and enhancer regions
BnGRP17-A10a	BnaA10g23950D	CAAT-box	CAAAT	9	5	-	Pisum sativum	common cis-acting element in promoter and enhancer regions	promoter and enhancer regions
BnGRP17-A10a	BnaA10g23950D	Box 4	ATTAAT	39	6	+	Petroselinum crispum	part of a conserved DNA module involved in light responsiveness	light response
BnGRP17-A10a	BnaA10g23950D	Box 4	ATTAAT	50	6	+	Petroselinum crispum	part of a conserved DNA module involved in light responsiveness	light response
BnGRP17-A10a	BnaA10g23950D	GT1-motif	GGTTAA	155	6	-	Arabidopsis thaliana	light responsive element	light response
BnGRP17-A10a	BnaA10g23950D	O2-site	GTTGACGTGA	245	9	-	Zea mays	cis-acting regulatory element involved in zein metabolism regulation	zein metabolism regulation
BnGRP17-A10a	BnaA10g23950D	TATA-box	taTATAAAtc	291	9	-	Arabidopsis thaliana	core promoter element around -30 of transcription start	core promoter element transcription start
BnGRP17-A10a	BnaA10g23950D	TATA-box	TATAAAA	292	7	-	Pisum sativum	core promoter element around -30 of transcription start	core promoter element transcription start
BnGRP17-A10a	BnaA10g23950D	TATA-box	TATAAA	293	6	-	Helianthus annuus	core promoter element around -30 of transcription start	core promoter element transcription start
BnGRP17-A10a	BnaA10g23950D	TATA-box	TATATAA	294	7	-	Arabidopsis thaliana	core promoter element around -30 of transcription start	core promoter element transcription start
BnGRP17-A10a	BnaA10g23950D	TATA-box	TATATA	295	6	+	Arabidopsis thaliana	core promoter element around -30 of transcription start	core promoter element transcription start
BnGRP17-A10a	BnaA10g23950D	TATA-box	ATATAT	296	6	+	Brassica napus	core promoter element around -30 of transcription start	core promoter element transcription start
BnGRP17-A10a	BnaA10g23950D	TATA-box	TATA	297	4	+	Arabidopsis thaliana	core promoter element around -30 of transcription start	core promoter element transcription start
BnGRP17-A10a	BnaA10g23950D	TATA-box	TATACA	330	6	-	Helianthus annuus	core promoter element around -30 of transcription start	core promoter element transcription start
BnGRP17-A10a	BnaA10g23950D	TATA-box	TATA	332	4	+	Arabidopsis thaliana	core promoter element around -30 of transcription start	core promoter element transcription start
BnGRP17-A10a	BnaA10g23950D	CAAT-box	CAAAT	336	5	+	Pisum sativum	common cis-acting element in promoter and enhancer regions	promoter and enhancer regions
BnGRP17-A10a	BnaA10g23950D	TC-rich repeats	GTTTTCTTAC	383	9	-	Nicotiana tabacum	cis-acting element involved in defense and stress responsiveness	defense and stress responsiveness
BnGRP17-A10a	BnaA10g23950D	CAAT-box	CAAAT	406	5	+	Pisum sativum	common cis-acting element in promoter and enhancer regions	promoter and enhancer regions
BnGRP17-A10a	BnaA10g23950D	CAAT-box	CAAAT	423	5	+	Pisum sativum	common cis-acting element in promoter and enhancer regions	promoter and enhancer regions
BnGRP17-A10a	BnaA10g23950D	CAAT-box	CAAAT	530	5	-	Pisum sativum	common cis-acting element in promoter and enhancer regions	promoter and enhancer regions
BnGRP17-A10a	BnaA10g23950D	MBS	CAACTG	541	6	-	Arabidopsis thaliana	MYB binding site involved in drought-inducibility	MYB binding site
BnGRP17-A10a	BnaA10g23950D	TATA-box	ATTATA	632	6	+	Brassica napus	core promoter element around -30 of transcription start	core promoter element transcription start
BnGRP17-A10a	BnaA10g23950D	TATA-box	TATAA	633	5	-	Arabidopsis thaliana	core promoter element around -30 of transcription start	core promoter element transcription start
BnGRP17-A10a	BnaA10g23950D	TATA-box	TATA	634	4	+	Arabidopsis thaliana	core promoter element around -30 of transcription start	core promoter element transcription start
BnGRP17-A10a	BnaA10g23950D	CAAT-box	CCAAT	642	5	+	Arabidopsis thaliana	common cis-acting element in promoter and enhancer regions	promoter and enhancer regions
BnGRP17-A10a	BnaA10g23950D	TATA-box	TATAAAA	651	7	-	Pisum sativum	core promoter element around -30 of transcription start	core promoter element transcription start
BnGRP17-A10a	BnaA10g23950D	TATA-box	TATAAA	652	6	-	Helianthus annuus	core promoter element around -30 of transcription start	core promoter element transcription start
BnGRP17-A10a	BnaA10g23950D	TATA-box	TATAA	653	5	-	Arabidopsis thaliana	core promoter element around -30 of transcription start	core promoter element transcription start
BnGRP17-A10a	BnaA10g23950D	TATA-box	TATA	654	4	+	Arabidopsis thaliana	core promoter element around -30 of transcription start	core promoter element transcription start
BnGRP17-A10a	BnaA10g23950D	CAAT-box	CCAAT	672	5	-	Arabidopsis thaliana	common cis-acting element in promoter and enhancer regions	promoter and enhancer regions
BnGRP17-A10a	BnaA10g23950D	ARE	AAACCA	674	6	-	Zea mays	cis-acting regulatory element essential for the anaerobic induction	anaerobic induction
BnGRP17-A10a	BnaA10g23950D	TATA-box	TATA	754	4	+	Arabidopsis thaliana	core promoter element around -30 of transcription start	core promoter element transcription start
BnGRP17-A10a	BnaA10g23950D	TATA-box	TATAAA	820	6	-	Helianthus annuus	core promoter element around -30 of transcription start	core promoter element transcription start
BnGRP17-A10a	BnaA10g23950D	TATA-box	TATAA	821	5	-	Arabidopsis thaliana	core promoter element around -30 of transcription start	core promoter element transcription start
BnGRP17-A10a	BnaA10g23950D	TATA-box	TATA	822	4	+	Arabidopsis thaliana	core promoter element around -30 of transcription start	core promoter element transcription start
BnGRP17-A10a	BnaA10g23950D	TATA-box	TATATA	954	6	+	Arabidopsis thaliana	core promoter element around -30 of transcription start	core promoter element transcription start
BnGRP17-A10a	BnaA10g23950D	TATA-box	ATATAA	955	6	+	Brassica oleracea	core promoter element around -30 of transcription start	core promoter element transcription start
BnGRP17-A10a	BnaA10g23950D	TATA-box	TATA	956	4	+	Arabidopsis thaliana	core promoter element around -30 of transcription start	core promoter element transcription start
BnGRP17-A10a	BnaA10g23950D	ATCT-motif	AATCTAATCC	970	10	+	Pisum sativum	part of a conserved DNA module involved in light responsiveness	light response
BnGRP17-A10a	BnaA10g23950D	CAAT-box	CAAAT	979	5	+	Pisum sativum	common cis-acting element in promoter and enhancer regions	promoter and enhancer regions
BnGRP17-A10a	BnaA10g23950D	TATA-box	ATATAT	1006	6	-	Brassica napus	core promoter element around -30 of transcription start	core promoter element transcription start
BnGRP17-A10a	BnaA10g23950D	TATA-box	TATATA	1007	6	-	Arabidopsis thaliana	core promoter element around -30 of transcription start	core promoter element transcription start
BnGRP17-A10a	BnaA10g23950D	TATA-box	ATATAA	1008	6	+	Brassica oleracea	core promoter element around -30 of transcription start	core promoter element transcription start
BnGRP17-A10a	BnaA10g23950D	TATA-box	TATA	1009	4	-	Arabidopsis thaliana	core promoter element around -30 of transcription start	core promoter element transcription start
BnGRP17-A10a	BnaA10g23950D	TATA-box	ATTATA	1020	6	+	Brassica napus	core promoter element around -30 of transcription start	core promoter element transcription start
BnGRP17-A10a	BnaA10g23950D	TATA-box	TATAA	1021	5	-	Arabidopsis thaliana	core promoter element around -30 of transcription start	core promoter element transcription start
BnGRP17-A10a	BnaA10g23950D	TATA-box	TATA	1022	4	-	Arabidopsis thaliana	core promoter element around -30 of transcription start	core promoter element transcription start
BnGRP17-A10a	BnaA10g23950D	CAAT-box	CAAAT	1033	5	-	Pisum sativum	common cis-acting element in promoter and enhancer regions	promoter and enhancer regions
BnGRP17-A10a	BnaA10g23950D	TATA-box	TATAAAA	1052	7	-	Pisum sativum	core promoter element around -30 of transcription start	core promoter element transcription start
BnGRP17-A10a	BnaA10g23950D	TATA-box	TATAAA	1053	6	-	Helianthus annuus	core promoter element around -30 of transcription start	core promoter element transcription start
BnGRP17-A10a	BnaA10g23950D	TATA-box	TATAA	1054	5	-	Arabidopsis thaliana	core promoter element around -30 of transcription start	core promoter element transcription start
BnGRP17-A10a	BnaA10g23950D	TATA-box	TATA	1055	4	-	Arabidopsis thaliana	core promoter element around -30 of transcription start	core promoter element transcription start
BnGRP17-A10a	BnaA10g23950D	TATA-box	TATA	1102	4	-	Arabidopsis thaliana	core promoter element around -30 of transcription start	core promoter element transcription start
BnGRP17-A10a	BnaA10g23950D		motif_sequence	1137	4	+	organism	short_function	short_function
BnGRP17-A10a	BnaA10g23950D	CAAT-box	CAAAT	1161	5	-	Pisum sativum	common cis-acting element in promoter and enhancer regions	promoter and enhancer regions
BnGRP17-A10a	BnaA10g23950D	CAAT-box	CAAAT	1175	5	+	Pisum sativum	common cis-acting element in promoter and enhancer regions	promoter and enhancer regions
BnGRP17-A10a	BnaA10g23950D	TATA-box	TATTTAAA	1179	8	+	Arabidopsis thaliana	core promoter element around -30 of transcription start	core promoter element transcription start
BnGRP17-A10a	BnaA10g23950D	TATA-box	TACATAAA	1198	8	-	Oryza sativa	core promoter element around -30 of transcription start	core promoter element transcription start
BnGRP17-A10a	BnaA10g23950D	TATA-box	TATTTAAA	1208	8	-	Arabidopsis thaliana	core promoter element around -30 of transcription start	core promoter element transcription start
BnGRP17-A10a	BnaA10g23950D	CAAT-box	CAAAT	1233	5	+	Pisum sativum	common cis-acting element in promoter and enhancer regions	promoter and enhancer regions
BnGRP17-A10a	BnaA10g23950D	TATA-box	TATAAAA	1245	7	-	Pisum sativum	core promoter element around -30 of transcription start	core promoter element transcription start
BnGRP17-A10a	BnaA10g23950D	TATA-box	TATAAA	1246	6	-	Helianthus annuus	core promoter element around -30 of transcription start	core promoter element transcription start
BnGRP17-A10a	BnaA10g23950D	TATA-box	TATAA	1247	5	-	Arabidopsis thaliana	core promoter element around -30 of transcription start	core promoter element transcription start
BnGRP17-A10a	BnaA10g23950D	TATA-box	TATA	1248	4	-	Arabidopsis thaliana	core promoter element around -30 of transcription start	core promoter element transcription start
BnGRP17-A10a	BnaA10g23950D	CAAT-box	CAAAT	1325	5	+	Pisum sativum	common cis-acting element in promoter and enhancer regions	promoter and enhancer regions
BnGRP17-A10a	BnaA10g23950D	CAAT-box	CAAAT	1357	5	+	Pisum sativum	common cis-acting element in promoter and enhancer regions	promoter and enhancer regions
BnGRP17-A10a	BnaA10g23950D	ARE	AAACCA	1364	6	+	Zea mays	cis-acting regulatory element essential for the anaerobic induction	anaerobic induction
BnGRP17-A10a	BnaA10g23950D	Box 4	ATTAAT	1376	6	-	Petroselinum crispum	part of a conserved DNA module involved in light responsiveness	light response
BnGRP17-A10a	BnaA10g23950D	MRE	AACCTAA	1406	7	+	Petroselinum crispum	MYB binding site involved in light responsiveness	MYB binding site
BnGRP17-A10a	BnaA10g23950D	TATA-box	ATATAT	1451	6	-	Brassica napus	core promoter element around -30 of transcription start	core promoter element transcription start
BnGRP17-A10a	BnaA10g23950D	TATA-box	TATA	1452	4	-	Arabidopsis thaliana	core promoter element around -30 of transcription start	core promoter element transcription start
BnGRP17-A10a	BnaA10g23950D		motif_sequence	1459	4	+	organism	short_function	short_function
BnGRP17-A10a	BnaA10g23950D	TATA-box	TATA	1478	4	-	Arabidopsis thaliana	core promoter element around -30 of transcription start	core promoter element transcription start
BnGRP17-A10a	BnaA10g23950D	CAAT-box	CAAAT	1485	5	+	Pisum sativum	common cis-acting element in promoter and enhancer regions	promoter and enhancer regions
BnGRP17-A10a	BnaA10g23950D	TATA-box	TATA	1502	4	-	Arabidopsis thaliana	core promoter element around -30 of transcription start	core promoter element transcription start
BnGRP17-A10a	BnaA10g23950D	TATA-box	TATAA	1540	5	-	Arabidopsis thaliana	core promoter element around -30 of transcription start	core promoter element transcription start
BnGRP17-A10a	BnaA10g23950D	TATA-box	TATA	1541	4	-	Arabidopsis thaliana	core promoter element around -30 of transcription start	core promoter element transcription start
BnGRP17-A10a	BnaA10g23950D		motif_sequence	1713	4	+	organism	short_function	short_function
BnGRP17-A10a	BnaA10g23950D	CAAT-box	CAAAT	1726	5	-	Pisum sativum	common cis-acting element in promoter and enhancer regions	promoter and enhancer regions
BnGRP17-A10a	BnaA10g23950D	ARE	AAACCA	1729	6	-	Zea mays	cis-acting regulatory element essential for the anaerobic induction	anaerobic induction
BnGRP17-A10a	BnaA10g23950D	MBSI	TTTTTACGGTTA	1753	11	-	Petunia hybrida	MYB binding site involved in flavonoid biosynthetic genes regulation	MYB binding site
BnGRP17-A10a	BnaA10g23950D		motif_sequence	1858	4	-	organism	short_function	short_function
BnGRP17-A10a	BnaA10g23950D	CGTCA-motif	CGTCA	1868	5	-	Hordeum vulgare	cis-acting regulatory element involved in the MeJA-responsiveness	MeJA-responsiveness
BnGRP17-A10a	BnaA10g23950D	TGACG-motif	TGACG	1868	5	+	Hordeum vulgare	cis-acting regulatory element involved in the MeJA-responsiveness	MeJA-responsiveness
BnGRP17-A10a	BnaA10g23950D	G-box	CACGTC	1869	6	-	Zea mays	cis-acting regulatory element involved in light responsiveness	light response
BnGRP17-A10a	BnaA10g23950D	ABRE	ACGTG	1870	5	+	Arabidopsis thaliana	cis-acting element involved in the abscisic acid responsiveness	abscisic acid responsiveness
BnGRP17-A10a	BnaA10g23950D	CGTCA-motif	CGTCA	1873	5	-	Hordeum vulgare	cis-acting regulatory element involved in the MeJA-responsiveness	MeJA-responsiveness
BnGRP17-A10a	BnaA10g23950D	TGACG-motif	TGACG	1873	5	+	Hordeum vulgare	cis-acting regulatory element involved in the MeJA-responsiveness	MeJA-responsiveness
BnGRP17-A10a	BnaA10g23950D	TGA-box	TGACGTAA	1873	8	+	Glycine max	part of an auxin-responsive element	auxin responsive
BnGRP17-A10a	BnaA10g23950D		motif_sequence	1887	4	-	organism	short_function	short_function
BnGRP17-A10a	BnaA10g23950D	TCT-motif	TCTTAC	1894	6	+	Arabidopsis thaliana	part of a light responsive element	light response
BnGRP17-A10a	BnaA10g23950D	ABRE	ACGTG	1905	5	-	Arabidopsis thaliana	cis-acting element involved in the abscisic acid responsiveness	abscisic acid responsiveness
BnGRP17-A10a	BnaA10g23950D	G-box	CACGTC	1905	6	+	Zea mays	cis-acting regulatory element involved in light responsiveness	light response
BnGRP17-A10a	BnaA10g23950D	TGA-element	AACGAC	1908	6	-	Brassica oleracea	auxin-responsive element	auxin responsive
BnGRP17-A10a	BnaA10g23950D		motif_sequence	1914	4	-	organism	short_function	short_function
BnGRP17-A10a	BnaA10g23950D	CAAT-box	CAAAT	1975	5	+	Pisum sativum	common cis-acting element in promoter and enhancer regions	promoter and enhancer regions
BnGRP17-A10a	BnaA10g23950D	Box 4	ATTAAT	1985	6	-	Petroselinum crispum	part of a conserved DNA module involved in light responsiveness	light response
BnGRP16-A10	BnaA10g30180D	CAAT-box	CAAAT	1	5	-	Pisum sativum	common cis-acting element in promoter and enhancer regions	promoter and enhancer regions
BnGRP16-A10	BnaA10g30180D		motif_sequence	17	4	+	organism	short_function	short_function
BnGRP16-A10	BnaA10g30180D	CAAT-box	CAAAT	27	5	-	Pisum sativum	common cis-acting element in promoter and enhancer regions	promoter and enhancer regions
BnGRP16-A10	BnaA10g30180D		motif_sequence	63	4	+	organism	short_function	short_function
BnGRP16-A10	BnaA10g30180D	TATA-box	TATAAAT	69	7	-	Brassica juncea	core promoter element around -30 of transcription start	core promoter element transcription start
BnGRP16-A10	BnaA10g30180D	TATA-box	TATAAA	70	6	-	Helianthus annuus	core promoter element around -30 of transcription start	core promoter element transcription start
BnGRP16-A10	BnaA10g30180D	TATA-box	TATAA	71	5	-	Arabidopsis thaliana	core promoter element around -30 of transcription start	core promoter element transcription start
BnGRP16-A10	BnaA10g30180D	TATA-box	TATA	72	4	+	Arabidopsis thaliana	core promoter element around -30 of transcription start	core promoter element transcription start
BnGRP16-A10	BnaA10g30180D	TATA-box	TATA	103	4	+	Arabidopsis thaliana	core promoter element around -30 of transcription start	core promoter element transcription start
BnGRP16-A10	BnaA10g30180D	CAAT-box	CCAAT	115	5	+	Arabidopsis thaliana	common cis-acting element in promoter and enhancer regions	promoter and enhancer regions
BnGRP16-A10	BnaA10g30180D	TATA-box	TATATA	123	6	+	Arabidopsis thaliana	core promoter element around -30 of transcription start	core promoter element transcription start
BnGRP16-A10	BnaA10g30180D	TATA-box	ATATAT	124	6	+	Brassica napus	core promoter element around -30 of transcription start	core promoter element transcription start
BnGRP16-A10	BnaA10g30180D	TATA-box	TATATA	125	6	+	Arabidopsis thaliana	core promoter element around -30 of transcription start	core promoter element transcription start
BnGRP16-A10	BnaA10g30180D	TATA-box	ATATAT	126	6	+	Brassica napus	core promoter element around -30 of transcription start	core promoter element transcription start
BnGRP16-A10	BnaA10g30180D	TATA-box	TATATA	127	6	+	Arabidopsis thaliana	core promoter element around -30 of transcription start	core promoter element transcription start
BnGRP16-A10	BnaA10g30180D	TATA-box	ATATAA	128	6	+	Brassica oleracea	core promoter element around -30 of transcription start	core promoter element transcription start
BnGRP16-A10	BnaA10g30180D	TATA-box	TATA	129	4	+	Arabidopsis thaliana	core promoter element around -30 of transcription start	core promoter element transcription start
BnGRP16-A10	BnaA10g30180D	TATA-box	ATATAT	136	6	+	Brassica napus	core promoter element around -30 of transcription start	core promoter element transcription start
BnGRP16-A10	BnaA10g30180D	TATA-box	TATA	137	4	+	Arabidopsis thaliana	core promoter element around -30 of transcription start	core promoter element transcription start
BnGRP16-A10	BnaA10g30180D	CAAT-box	CAAAT	140	5	-	Pisum sativum	common cis-acting element in promoter and enhancer regions	promoter and enhancer regions
BnGRP16-A10	BnaA10g30180D		motif_sequence	153	4	+	organism	short_function	short_function
BnGRP16-A10	BnaA10g30180D	ABRE	ACGTG	162	5	-	Arabidopsis thaliana	cis-acting element involved in the abscisic acid responsiveness	abscisic acid responsiveness
BnGRP16-A10	BnaA10g30180D	G-box	CACGTC	162	6	+	Zea mays	cis-acting regulatory element involved in light responsiveness	light response
BnGRP16-A10	BnaA10g30180D	TGACG-motif	TGACG	164	5	-	Hordeum vulgare	cis-acting regulatory element involved in the MeJA-responsiveness	MeJA-responsiveness
BnGRP16-A10	BnaA10g30180D	CGTCA-motif	CGTCA	164	5	+	Hordeum vulgare	cis-acting regulatory element involved in the MeJA-responsiveness	MeJA-responsiveness
BnGRP16-A10	BnaA10g30180D	CGTCA-motif	CGTCA	198	5	-	Hordeum vulgare	cis-acting regulatory element involved in the MeJA-responsiveness	MeJA-responsiveness
BnGRP16-A10	BnaA10g30180D	TGACG-motif	TGACG	198	5	+	Hordeum vulgare	cis-acting regulatory element involved in the MeJA-responsiveness	MeJA-responsiveness
BnGRP16-A10	BnaA10g30180D	G-box	ACACGTGGC	202	9	-	Brassica napus	cis-acting regulatory element involved in light responsiveness	light response
BnGRP16-A10	BnaA10g30180D	ABRE	GCAACGTGTC	202	9	+	Hordeum vulgare	cis-acting element involved in the abscisic acid responsiveness	abscisic acid responsiveness
BnGRP16-A10	BnaA10g30180D	ABRE	CACGTG	204	6	+	Arabidopsis thaliana	cis-acting element involved in the abscisic acid responsiveness	abscisic acid responsiveness
BnGRP16-A10	BnaA10g30180D	G-box	CACGTG	204	6	+	Arabidopsis thaliana	cis-acting regulatory element involved in light responsiveness	light response
BnGRP16-A10	BnaA10g30180D	ABRE	ACGTG	205	5	+	Arabidopsis thaliana	cis-acting element involved in the abscisic acid responsiveness	abscisic acid responsiveness
BnGRP16-A10	BnaA10g30180D		motif_sequence	226	4	-	organism	short_function	short_function
BnGRP16-A10	BnaA10g30180D	CAAT-box	CCAAT	250	5	-	Arabidopsis thaliana	common cis-acting element in promoter and enhancer regions	promoter and enhancer regions
BnGRP16-A10	BnaA10g30180D	CAAT-box	CCAAT	275	5	-	Arabidopsis thaliana	common cis-acting element in promoter and enhancer regions	promoter and enhancer regions
BnGRP16-A10	BnaA10g30180D	LAMP-element	CTTTATCA	284	8	-	Pisum sativum	part of a light responsive element	light response
BnGRP16-A10	BnaA10g30180D	CCAAT-box	CAACGG	371	6	-	Hordeum vulgare	MYBHv1 binding site	MYBHv1 binding site
BnGRP16-A10	BnaA10g30180D		motif_sequence	381	4	+	organism	short_function	short_function
BnGRP16-A10	BnaA10g30180D	Sp1	GGGCGG	439	6	-	Oryza sativa	light responsive element	light response
BnGRP16-A10	BnaA10g30180D	Sp1	GGGCGG	452	6	-	Oryza sativa	light responsive element	light response
BnGRP16-A10	BnaA10g30180D	GT1-motif	GGTTAA	465	6	+	Arabidopsis thaliana	light responsive element	light response
BnGRP16-A10	BnaA10g30180D	chs-CMA2a	TCACTTGA	481	8	+	Petroselinum crispum	part of a light responsive element	light response
BnGRP16-A10	BnaA10g30180D	TATA-box	ATTATA	491	6	+	Brassica napus	core promoter element around -30 of transcription start	core promoter element transcription start
BnGRP16-A10	BnaA10g30180D	TATA-box	TATAA	492	5	-	Arabidopsis thaliana	core promoter element around -30 of transcription start	core promoter element transcription start
BnGRP16-A10	BnaA10g30180D	TATA-box	TATA	493	4	+	Arabidopsis thaliana	core promoter element around -30 of transcription start	core promoter element transcription start
BnGRP16-A10	BnaA10g30180D	AE-box	AGAAACAA	705	8	+	Arabidopsis thaliana	part of a module for light response	light response
BnGRP16-A10	BnaA10g30180D	TATA-box	TATA	729	4	+	Arabidopsis thaliana	core promoter element around -30 of transcription start	core promoter element transcription start
BnGRP16-A10	BnaA10g30180D	CAAT-box	CAAAT	737	5	+	Pisum sativum	common cis-acting element in promoter and enhancer regions	promoter and enhancer regions
BnGRP16-A10	BnaA10g30180D	TGA-element	AACGAC	773	6	+	Brassica oleracea	auxin-responsive element	auxin responsive
BnGRP16-A10	BnaA10g30180D	TATA-box	TATATAA	858	7	-	Arabidopsis thaliana	core promoter element around -30 of transcription start	core promoter element transcription start
BnGRP16-A10	BnaA10g30180D	TATA-box	TATATA	859	6	+	Arabidopsis thaliana	core promoter element around -30 of transcription start	core promoter element transcription start
BnGRP16-A10	BnaA10g30180D	TATA-box	ATATAT	860	6	+	Brassica napus	core promoter element around -30 of transcription start	core promoter element transcription start
BnGRP16-A10	BnaA10g30180D	TATA-box	TATATA	861	6	+	Arabidopsis thaliana	core promoter element around -30 of transcription start	core promoter element transcription start
BnGRP16-A10	BnaA10g30180D	TATA-box	ATATAA	862	6	+	Brassica oleracea	core promoter element around -30 of transcription start	core promoter element transcription start
BnGRP16-A10	BnaA10g30180D	TATA-box	TATA	863	4	+	Arabidopsis thaliana	core promoter element around -30 of transcription start	core promoter element transcription start
BnGRP16-A10	BnaA10g30180D	CAAT-box	CAAAT	928	5	-	Pisum sativum	common cis-acting element in promoter and enhancer regions	promoter and enhancer regions
BnGRP16-A10	BnaA10g30180D	TATA-box	TATAAAA	939	7	-	Pisum sativum	core promoter element around -30 of transcription start	core promoter element transcription start
BnGRP16-A10	BnaA10g30180D	TATA-box	TATAAA	940	6	-	Helianthus annuus	core promoter element around -30 of transcription start	core promoter element transcription start
BnGRP16-A10	BnaA10g30180D	TATA-box	TATAA	941	5	-	Arabidopsis thaliana	core promoter element around -30 of transcription start	core promoter element transcription start
BnGRP16-A10	BnaA10g30180D	TATA-box	TATA	942	4	+	Arabidopsis thaliana	core promoter element around -30 of transcription start	core promoter element transcription start
BnGRP16-A10	BnaA10g30180D	TATA-box	TATAA	959	5	-	Arabidopsis thaliana	core promoter element around -30 of transcription start	core promoter element transcription start
BnGRP16-A10	BnaA10g30180D	TATA-box	TATA	960	4	+	Arabidopsis thaliana	core promoter element around -30 of transcription start	core promoter element transcription start
BnGRP16-A10	BnaA10g30180D	TATA-box	TATAAAA	966	7	-	Pisum sativum	core promoter element around -30 of transcription start	core promoter element transcription start
BnGRP16-A10	BnaA10g30180D	TATA-box	TATAAA	967	6	-	Helianthus annuus	core promoter element around -30 of transcription start	core promoter element transcription start
BnGRP16-A10	BnaA10g30180D	TATA-box	TATAA	968	5	-	Arabidopsis thaliana	core promoter element around -30 of transcription start	core promoter element transcription start
BnGRP16-A10	BnaA10g30180D	TATA-box	TATA	969	4	+	Arabidopsis thaliana	core promoter element around -30 of transcription start	core promoter element transcription start
BnGRP16-A10	BnaA10g30180D	TATA-box	ATTATA	977	6	+	Brassica napus	core promoter element around -30 of transcription start	core promoter element transcription start
BnGRP16-A10	BnaA10g30180D	TATA-box	TATAA	978	5	-	Arabidopsis thaliana	core promoter element around -30 of transcription start	core promoter element transcription start
BnGRP16-A10	BnaA10g30180D	TATA-box	TATA	979	4	+	Arabidopsis thaliana	core promoter element around -30 of transcription start	core promoter element transcription start
BnGRP16-A10	BnaA10g30180D	TATA-box	TATAAATA	984	8	-	Daucus carota	core promoter element around -30 of transcription start	core promoter element transcription start
BnGRP16-A10	BnaA10g30180D	TATA-box	TATAAAT	985	7	-	Brassica juncea	core promoter element around -30 of transcription start	core promoter element transcription start
BnGRP16-A10	BnaA10g30180D	TATA-box	TATAAA	986	6	-	Helianthus annuus	core promoter element around -30 of transcription start	core promoter element transcription start
BnGRP16-A10	BnaA10g30180D	TATA-box	TATAA	987	5	-	Arabidopsis thaliana	core promoter element around -30 of transcription start	core promoter element transcription start
BnGRP16-A10	BnaA10g30180D	TATA-box	TATA	988	4	+	Arabidopsis thaliana	core promoter element around -30 of transcription start	core promoter element transcription start
BnGRP16-A10	BnaA10g30180D	TATA-box	TATA	1012	4	-	Arabidopsis thaliana	core promoter element around -30 of transcription start	core promoter element transcription start
BnGRP16-A10	BnaA10g30180D	TATA-box	TATAA	1072	5	-	Arabidopsis thaliana	core promoter element around -30 of transcription start	core promoter element transcription start
BnGRP16-A10	BnaA10g30180D	TATA-box	TATA	1073	4	-	Arabidopsis thaliana	core promoter element around -30 of transcription start	core promoter element transcription start
BnGRP16-A10	BnaA10g30180D	CAAT-box	CAAAT	1086	5	-	Pisum sativum	common cis-acting element in promoter and enhancer regions	promoter and enhancer regions
BnGRP16-A10	BnaA10g30180D		motif_sequence	1098	4	+	organism	short_function	short_function
BnGRP16-A10	BnaA10g30180D	CAAT-box	CAAAT	1115	5	+	Pisum sativum	common cis-acting element in promoter and enhancer regions	promoter and enhancer regions
BnGRP16-A10	BnaA10g30180D	ARE	AAACCA	1131	6	-	Zea mays	cis-acting regulatory element essential for the anaerobic induction	anaerobic induction
BnGRP16-A10	BnaA10g30180D	CAAT-box	CAAAT	1147	5	-	Pisum sativum	common cis-acting element in promoter and enhancer regions	promoter and enhancer regions
BnGRP16-A10	BnaA10g30180D	CAAT-box	CAAAT	1158	5	-	Pisum sativum	common cis-acting element in promoter and enhancer regions	promoter and enhancer regions
BnGRP16-A10	BnaA10g30180D	CAAT-box	CAAAT	1192	5	-	Pisum sativum	common cis-acting element in promoter and enhancer regions	promoter and enhancer regions
BnGRP16-A10	BnaA10g30180D	TATA-box	TACAAAA	1209	7	+	Oryza sativa	core promoter element around -30 of transcription start	core promoter element transcription start
BnGRP16-A10	BnaA10g30180D	TATA-box	TATACA	1295	6	-	Helianthus annuus	core promoter element around -30 of transcription start	core promoter element transcription start
BnGRP16-A10	BnaA10g30180D	TATA-box	TATA	1297	4	-	Arabidopsis thaliana	core promoter element around -30 of transcription start	core promoter element transcription start
BnGRP16-A10	BnaA10g30180D		motif_sequence	1313	4	-	organism	short_function	short_function
BnGRP16-A10	BnaA10g30180D	CAAT-box	CCAAT	1492	5	+	Arabidopsis thaliana	common cis-acting element in promoter and enhancer regions	promoter and enhancer regions
BnGRP16-A10	BnaA10g30180D	CAAT-box	CAAAT	1505	5	+	Pisum sativum	common cis-acting element in promoter and enhancer regions	promoter and enhancer regions
BnGRP16-A10	BnaA10g30180D	TATA-box	TATATA	1546	6	-	Arabidopsis thaliana	core promoter element around -30 of transcription start	core promoter element transcription start
BnGRP16-A10	BnaA10g30180D	TATA-box	TATA	1548	4	-	Arabidopsis thaliana	core promoter element around -30 of transcription start	core promoter element transcription start
BnGRP16-A10	BnaA10g30180D	TATA-box	TACAAAA	1554	7	+	Oryza sativa	core promoter element around -30 of transcription start	core promoter element transcription start
BnGRP16-A10	BnaA10g30180D		motif_sequence	1594	4	-	organism	short_function	short_function
BnGRP16-A10	BnaA10g30180D	CAAT-box	CAAAT	1629	5	-	Pisum sativum	common cis-acting element in promoter and enhancer regions	promoter and enhancer regions
BnGRP16-A10	BnaA10g30180D	CAAT-box	CAAAT	1651	5	+	Pisum sativum	common cis-acting element in promoter and enhancer regions	promoter and enhancer regions
BnGRP16-A10	BnaA10g30180D	O2-site	GTTGACGTGA	1657	9	+	Zea mays	cis-acting regulatory element involved in zein metabolism regulation	zein metabolism regulation
BnGRP16-A10	BnaA10g30180D	CAAT-box	CAAAT	1669	5	-	Pisum sativum	common cis-acting element in promoter and enhancer regions	promoter and enhancer regions
BnGRP16-A10	BnaA10g30180D	TATA-box	TATA	1727	4	-	Arabidopsis thaliana	core promoter element around -30 of transcription start	core promoter element transcription start
BnGRP16-A10	BnaA10g30180D	TATA-box	ATATAT	1793	6	-	Brassica napus	core promoter element around -30 of transcription start	core promoter element transcription start
BnGRP16-A10	BnaA10g30180D	TATA-box	TATA	1794	4	-	Arabidopsis thaliana	core promoter element around -30 of transcription start	core promoter element transcription start
BnGRP16-A10	BnaA10g30180D	CGTCA-motif	CGTCA	1798	5	-	Hordeum vulgare	cis-acting regulatory element involved in the MeJA-responsiveness	MeJA-responsiveness
BnGRP16-A10	BnaA10g30180D	TGACG-motif	TGACG	1798	5	+	Hordeum vulgare	cis-acting regulatory element involved in the MeJA-responsiveness	MeJA-responsiveness
BnGRP16-A10	BnaA10g30180D		motif_sequence	1805	4	-	organism	short_function	short_function
BnGRP16-A10	BnaA10g30180D	CGTCA-motif	CGTCA	1817	5	-	Hordeum vulgare	cis-acting regulatory element involved in the MeJA-responsiveness	MeJA-responsiveness
BnGRP16-A10	BnaA10g30180D	TGACG-motif	TGACG	1817	5	+	Hordeum vulgare	cis-acting regulatory element involved in the MeJA-responsiveness	MeJA-responsiveness
BnGRP16-A10	BnaA10g30180D		motif_sequence	1830	4	+	organism	short_function	short_function
BnGRP16-A10	BnaA10g30180D	G-box	TACGTG	1873	6	+	Arabidopsis thaliana	cis-acting regulatory element involved in light responsiveness	light response
BnGRP16-A10	BnaA10g30180D	ABRE	ACGTG	1874	5	+	Arabidopsis thaliana	cis-acting element involved in the abscisic acid responsiveness	abscisic acid responsiveness
BnGRP16-A10	BnaA10g30180D	CAAT-box	CAAAT	1947	5	+	Pisum sativum	common cis-acting element in promoter and enhancer regions	promoter and enhancer regions
BnGRP16-A10	BnaA10g30180D	ARE	AAACCA	1967	6	+	Zea mays	cis-acting regulatory element essential for the anaerobic induction	anaerobic induction
BnGRP16-A10	BnaA10g30180D	CAAT-box	CAAAT	1971	5	+	Pisum sativum	common cis-acting element in promoter and enhancer regions	promoter and enhancer regions
BnGRP16-A10	BnaA10g30180D	TATA-box	TATA	1990	4	-	Arabidopsis thaliana	core promoter element around -30 of transcription start	core promoter element transcription start
BnGRP16-Cnn	BnaCnng36370D	TATA-box	TATAAATA	5	8	-	Daucus carota	core promoter element around -30 of transcription start	core promoter element transcription start
BnGRP16-Cnn	BnaCnng36370D	TATA-box	TATAAAT	6	7	-	Brassica juncea	core promoter element around -30 of transcription start	core promoter element transcription start
BnGRP16-Cnn	BnaCnng36370D	TATA-box	TATAAA	7	6	-	Helianthus annuus	core promoter element around -30 of transcription start	core promoter element transcription start
BnGRP16-Cnn	BnaCnng36370D	TATA-box	TATAA	8	5	-	Arabidopsis thaliana	core promoter element around -30 of transcription start	core promoter element transcription start
BnGRP16-Cnn	BnaCnng36370D	TATA-box	TATA	9	4	+	Arabidopsis thaliana	core promoter element around -30 of transcription start	core promoter element transcription start
BnGRP16-Cnn	BnaCnng36370D		motif_sequence	37	4	+	organism	short_function	short_function
BnGRP16-Cnn	BnaCnng36370D	TATA-box	TATA	77	4	+	Arabidopsis thaliana	core promoter element around -30 of transcription start	core promoter element transcription start
BnGRP16-Cnn	BnaCnng36370D	TATA-box	ATATAA	82	6	+	Brassica oleracea	core promoter element around -30 of transcription start	core promoter element transcription start
BnGRP16-Cnn	BnaCnng36370D	TATA-box	TATA	83	4	+	Arabidopsis thaliana	core promoter element around -30 of transcription start	core promoter element transcription start
BnGRP16-Cnn	BnaCnng36370D		motif_sequence	102	4	-	organism	short_function	short_function
BnGRP16-Cnn	BnaCnng36370D		motif_sequence	112	4	-	organism	short_function	short_function
BnGRP16-Cnn	BnaCnng36370D	CAAT-box	CAAAT	131	5	+	Pisum sativum	common cis-acting element in promoter and enhancer regions	promoter and enhancer regions
BnGRP16-Cnn	BnaCnng36370D	TATA-box	ATATAT	134	6	+	Brassica napus	core promoter element around -30 of transcription start	core promoter element transcription start
BnGRP16-Cnn	BnaCnng36370D	TATA-box	TATATA	135	6	+	Arabidopsis thaliana	core promoter element around -30 of transcription start	core promoter element transcription start
BnGRP16-Cnn	BnaCnng36370D	TATA-box	ATATAA	136	6	+	Brassica oleracea	core promoter element around -30 of transcription start	core promoter element transcription start
BnGRP16-Cnn	BnaCnng36370D	TATA-box	TATA	137	4	+	Arabidopsis thaliana	core promoter element around -30 of transcription start	core promoter element transcription start
BnGRP16-Cnn	BnaCnng36370D	TGACG-motif	TGACG	144	5	-	Hordeum vulgare	cis-acting regulatory element involved in the MeJA-responsiveness	MeJA-responsiveness
BnGRP16-Cnn	BnaCnng36370D	CGTCA-motif	CGTCA	144	5	+	Hordeum vulgare	cis-acting regulatory element involved in the MeJA-responsiveness	MeJA-responsiveness
BnGRP16-Cnn	BnaCnng36370D		motif_sequence	151	4	+	organism	short_function	short_function
BnGRP16-Cnn	BnaCnng36370D	TATA-box	TATA	263	4	+	Arabidopsis thaliana	core promoter element around -30 of transcription start	core promoter element transcription start
BnGRP16-Cnn	BnaCnng36370D		motif_sequence	276	4	-	organism	short_function	short_function
BnGRP16-Cnn	BnaCnng36370D	TATA-box	TATTTAAA	301	8	-	Arabidopsis thaliana	core promoter element around -30 of transcription start	core promoter element transcription start
BnGRP16-Cnn	BnaCnng36370D	TATA-box	ATATAT	306	6	+	Brassica napus	core promoter element around -30 of transcription start	core promoter element transcription start
BnGRP16-Cnn	BnaCnng36370D	TATA-box	TATATA	307	6	+	Arabidopsis thaliana	core promoter element around -30 of transcription start	core promoter element transcription start
BnGRP16-Cnn	BnaCnng36370D	TATA-box	ATATAA	308	6	+	Brassica oleracea	core promoter element around -30 of transcription start	core promoter element transcription start
BnGRP16-Cnn	BnaCnng36370D	TATA-box	TATA	309	4	+	Arabidopsis thaliana	core promoter element around -30 of transcription start	core promoter element transcription start
BnGRP16-Cnn	BnaCnng36370D	CAAT-box	CCAAT	368	5	-	Arabidopsis thaliana	common cis-acting element in promoter and enhancer regions	promoter and enhancer regions
BnGRP16-Cnn	BnaCnng36370D	GC-motif	CCCCCG	376	6	-	Zea mays	enhancer-like element involved in anoxic specific inducibility	anoxic specific inducibility
BnGRP16-Cnn	BnaCnng36370D	MRE	AACCTAA	487	7	+	Petroselinum crispum	MYB binding site involved in light responsiveness	MYB binding site
BnGRP16-Cnn	BnaCnng36370D	TATA-box	TATA	551	4	+	Arabidopsis thaliana	core promoter element around -30 of transcription start	core promoter element transcription start
BnGRP16-Cnn	BnaCnng36370D	CAAT-box	CAAAT	563	5	+	Pisum sativum	common cis-acting element in promoter and enhancer regions	promoter and enhancer regions
BnGRP16-Cnn	BnaCnng36370D	TATA-box	TATACA	567	6	-	Helianthus annuus	core promoter element around -30 of transcription start	core promoter element transcription start
BnGRP16-Cnn	BnaCnng36370D	TATA-box	TATA	569	4	+	Arabidopsis thaliana	core promoter element around -30 of transcription start	core promoter element transcription start
BnGRP16-Cnn	BnaCnng36370D	TATA-box	ATTATA	585	6	+	Brassica napus	core promoter element around -30 of transcription start	core promoter element transcription start
BnGRP16-Cnn	BnaCnng36370D	TATA-box	TATAA	586	5	-	Arabidopsis thaliana	core promoter element around -30 of transcription start	core promoter element transcription start
BnGRP16-Cnn	BnaCnng36370D	TATA-box	TATA	587	4	+	Arabidopsis thaliana	core promoter element around -30 of transcription start	core promoter element transcription start
BnGRP16-Cnn	BnaCnng36370D		motif_sequence	595	4	+	organism	short_function	short_function
BnGRP16-Cnn	BnaCnng36370D	TATA-box	TATACA	611	6	-	Helianthus annuus	core promoter element around -30 of transcription start	core promoter element transcription start
BnGRP16-Cnn	BnaCnng36370D	TATA-box	TATATA	613	6	+	Arabidopsis thaliana	core promoter element around -30 of transcription start	core promoter element transcription start
BnGRP16-Cnn	BnaCnng36370D	TATA-box	ATATAT	614	6	+	Brassica napus	core promoter element around -30 of transcription start	core promoter element transcription start
BnGRP16-Cnn	BnaCnng36370D	TATA-box	TATA	615	4	+	Arabidopsis thaliana	core promoter element around -30 of transcription start	core promoter element transcription start
BnGRP16-Cnn	BnaCnng36370D	TATA-box	ATTATA	658	6	+	Brassica napus	core promoter element around -30 of transcription start	core promoter element transcription start
BnGRP16-Cnn	BnaCnng36370D	TATA-box	TATAA	659	5	-	Arabidopsis thaliana	core promoter element around -30 of transcription start	core promoter element transcription start
BnGRP16-Cnn	BnaCnng36370D	TATA-box	TATA	660	4	+	Arabidopsis thaliana	core promoter element around -30 of transcription start	core promoter element transcription start
BnGRP16-Cnn	BnaCnng36370D	CAAT-box	CAAAT	758	5	-	Pisum sativum	common cis-acting element in promoter and enhancer regions	promoter and enhancer regions
BnGRP16-Cnn	BnaCnng36370D	TATA-box	TATATA	797	6	+	Arabidopsis thaliana	core promoter element around -30 of transcription start	core promoter element transcription start
BnGRP16-Cnn	BnaCnng36370D	TATA-box	ATATAA	798	6	+	Brassica oleracea	core promoter element around -30 of transcription start	core promoter element transcription start
BnGRP16-Cnn	BnaCnng36370D	TATA-box	TATA	799	4	+	Arabidopsis thaliana	core promoter element around -30 of transcription start	core promoter element transcription start
BnGRP16-Cnn	BnaCnng36370D	CGTCA-motif	CGTCA	806	5	-	Hordeum vulgare	cis-acting regulatory element involved in the MeJA-responsiveness	MeJA-responsiveness
BnGRP16-Cnn	BnaCnng36370D	TGACG-motif	TGACG	806	5	+	Hordeum vulgare	cis-acting regulatory element involved in the MeJA-responsiveness	MeJA-responsiveness
BnGRP16-Cnn	BnaCnng36370D	CAAT-box	CAAAT	843	5	-	Pisum sativum	common cis-acting element in promoter and enhancer regions	promoter and enhancer regions
BnGRP16-Cnn	BnaCnng36370D	CAAT-box	CAAAT	869	5	-	Pisum sativum	common cis-acting element in promoter and enhancer regions	promoter and enhancer regions
BnGRP16-Cnn	BnaCnng36370D		motif_sequence	905	4	+	organism	short_function	short_function
BnGRP16-Cnn	BnaCnng36370D	TATA-box	TATAAAT	911	7	-	Brassica juncea	core promoter element around -30 of transcription start	core promoter element transcription start
BnGRP16-Cnn	BnaCnng36370D	TATA-box	TATAAA	912	6	-	Helianthus annuus	core promoter element around -30 of transcription start	core promoter element transcription start
BnGRP16-Cnn	BnaCnng36370D	TATA-box	TATAA	913	5	-	Arabidopsis thaliana	core promoter element around -30 of transcription start	core promoter element transcription start
BnGRP16-Cnn	BnaCnng36370D	TATA-box	TATA	914	4	+	Arabidopsis thaliana	core promoter element around -30 of transcription start	core promoter element transcription start
BnGRP16-Cnn	BnaCnng36370D	TATA-box	TATA	945	4	+	Arabidopsis thaliana	core promoter element around -30 of transcription start	core promoter element transcription start
BnGRP16-Cnn	BnaCnng36370D	CAAT-box	CCAAT	957	5	+	Arabidopsis thaliana	common cis-acting element in promoter and enhancer regions	promoter and enhancer regions
BnGRP16-Cnn	BnaCnng36370D	TATA-box	ATTATA	962	6	+	Brassica napus	core promoter element around -30 of transcription start	core promoter element transcription start
BnGRP16-Cnn	BnaCnng36370D	TATA-box	TATAA	963	5	-	Arabidopsis thaliana	core promoter element around -30 of transcription start	core promoter element transcription start
BnGRP16-Cnn	BnaCnng36370D	TATA-box	TATA	964	4	+	Arabidopsis thaliana	core promoter element around -30 of transcription start	core promoter element transcription start
BnGRP16-Cnn	BnaCnng36370D	CAAT-box	CAAAT	977	5	-	Pisum sativum	common cis-acting element in promoter and enhancer regions	promoter and enhancer regions
BnGRP16-Cnn	BnaCnng36370D		motif_sequence	989	4	+	organism	short_function	short_function
BnGRP16-Cnn	BnaCnng36370D	CAAT-box	CCAAT	1008	5	+	Arabidopsis thaliana	common cis-acting element in promoter and enhancer regions	promoter and enhancer regions
BnGRP16-Cnn	BnaCnng36370D	ARE	AAACCA	1022	6	-	Zea mays	cis-acting regulatory element essential for the anaerobic induction	anaerobic induction
BnGRP16-Cnn	BnaCnng36370D	CAAT-box	CAAAT	1038	5	-	Pisum sativum	common cis-acting element in promoter and enhancer regions	promoter and enhancer regions
BnGRP16-Cnn	BnaCnng36370D	CAAT-box	CAAAT	1049	5	-	Pisum sativum	common cis-acting element in promoter and enhancer regions	promoter and enhancer regions
BnGRP16-Cnn	BnaCnng36370D	G-box	TAAACGTG	1075	8	-	Brassica oleracea	cis-acting regulatory element involved in light responsiveness	light response
BnGRP16-Cnn	BnaCnng36370D	ABRE	ACGTG	1075	5	-	Arabidopsis thaliana	cis-acting element involved in the abscisic acid responsiveness	abscisic acid responsiveness
BnGRP16-Cnn	BnaCnng36370D	G-box	CACGTT	1075	6	+	Pisum sativum	cis-acting regulatory element involved in light responsiveness	light response
BnGRP16-Cnn	BnaCnng36370D	CAAT-box	CAAAT	1083	5	-	Pisum sativum	common cis-acting element in promoter and enhancer regions	promoter and enhancer regions
BnGRP16-Cnn	BnaCnng36370D	TATA-box	TACAAAA	1100	7	+	Oryza sativa	core promoter element around -30 of transcription start	core promoter element transcription start
BnGRP16-Cnn	BnaCnng36370D		motif_sequence	1117	4	-	organism	short_function	short_function
BnGRP16-Cnn	BnaCnng36370D		motif_sequence	1204	4	-	organism	short_function	short_function
BnGRP16-Cnn	BnaCnng36370D	CAAT-box	CCAAT	1382	5	+	Arabidopsis thaliana	common cis-acting element in promoter and enhancer regions	promoter and enhancer regions
BnGRP16-Cnn	BnaCnng36370D	CAAT-box	CAAAT	1395	5	+	Pisum sativum	common cis-acting element in promoter and enhancer regions	promoter and enhancer regions
BnGRP16-Cnn	BnaCnng36370D	TATA-box	ATATAT	1433	6	-	Brassica napus	core promoter element around -30 of transcription start	core promoter element transcription start
BnGRP16-Cnn	BnaCnng36370D	TATA-box	TATA	1434	4	-	Arabidopsis thaliana	core promoter element around -30 of transcription start	core promoter element transcription start
BnGRP16-Cnn	BnaCnng36370D	ARE	AAACCA	1441	6	+	Zea mays	cis-acting regulatory element essential for the anaerobic induction	anaerobic induction
BnGRP16-Cnn	BnaCnng36370D	CAAT-box	CAAAT	1455	5	+	Pisum sativum	common cis-acting element in promoter and enhancer regions	promoter and enhancer regions
BnGRP16-Cnn	BnaCnng36370D	ARE	AAACCA	1490	6	-	Zea mays	cis-acting regulatory element essential for the anaerobic induction	anaerobic induction
BnGRP16-Cnn	BnaCnng36370D	TATA-box	ATATAT	1498	6	-	Brassica napus	core promoter element around -30 of transcription start	core promoter element transcription start
BnGRP16-Cnn	BnaCnng36370D	TATA-box	TATA	1499	4	-	Arabidopsis thaliana	core promoter element around -30 of transcription start	core promoter element transcription start
BnGRP16-Cnn	BnaCnng36370D	Box 4	ATTAAT	1502	6	-	Petroselinum crispum	part of a conserved DNA module involved in light responsiveness	light response
BnGRP16-Cnn	BnaCnng36370D	MBS	CAACTG	1514	6	-	Arabidopsis thaliana	MYB binding site involved in drought-inducibility	MYB binding site
BnGRP16-Cnn	BnaCnng36370D	TATA-box	TATATA	1546	6	-	Arabidopsis thaliana	core promoter element around -30 of transcription start	core promoter element transcription start
BnGRP16-Cnn	BnaCnng36370D	TATA-box	TATA	1548	4	-	Arabidopsis thaliana	core promoter element around -30 of transcription start	core promoter element transcription start
BnGRP16-Cnn	BnaCnng36370D	TATA-box	TACAAAA	1554	7	+	Oryza sativa	core promoter element around -30 of transcription start	core promoter element transcription start
BnGRP16-Cnn	BnaCnng36370D	CAAT-box	CAAAT	1629	5	-	Pisum sativum	common cis-acting element in promoter and enhancer regions	promoter and enhancer regions
BnGRP16-Cnn	BnaCnng36370D	CAAT-box	CAAAT	1651	5	+	Pisum sativum	common cis-acting element in promoter and enhancer regions	promoter and enhancer regions
BnGRP16-Cnn	BnaCnng36370D	O2-site	GTTGACGTGA	1657	9	+	Zea mays	cis-acting regulatory element involved in zein metabolism regulation	zein metabolism regulation
BnGRP16-Cnn	BnaCnng36370D	CAAT-box	CAAAT	1669	5	-	Pisum sativum	common cis-acting element in promoter and enhancer regions	promoter and enhancer regions
BnGRP16-Cnn	BnaCnng36370D	TATA-box	TATA	1727	4	-	Arabidopsis thaliana	core promoter element around -30 of transcription start	core promoter element transcription start
BnGRP16-Cnn	BnaCnng36370D	TCT-motif	TCTTAC	1749	6	+	Arabidopsis thaliana	part of a light responsive element	light response
BnGRP16-Cnn	BnaCnng36370D	TATA-box	ATATAT	1793	6	-	Brassica napus	core promoter element around -30 of transcription start	core promoter element transcription start
BnGRP16-Cnn	BnaCnng36370D	TATA-box	TATA	1794	4	-	Arabidopsis thaliana	core promoter element around -30 of transcription start	core promoter element transcription start
BnGRP16-Cnn	BnaCnng36370D	CGTCA-motif	CGTCA	1798	5	-	Hordeum vulgare	cis-acting regulatory element involved in the MeJA-responsiveness	MeJA-responsiveness
BnGRP16-Cnn	BnaCnng36370D	TGACG-motif	TGACG	1798	5	+	Hordeum vulgare	cis-acting regulatory element involved in the MeJA-responsiveness	MeJA-responsiveness
BnGRP16-Cnn	BnaCnng36370D		motif_sequence	1805	4	-	organism	short_function	short_function
BnGRP16-Cnn	BnaCnng36370D	CGTCA-motif	CGTCA	1817	5	-	Hordeum vulgare	cis-acting regulatory element involved in the MeJA-responsiveness	MeJA-responsiveness
BnGRP16-Cnn	BnaCnng36370D	TGACG-motif	TGACG	1817	5	+	Hordeum vulgare	cis-acting regulatory element involved in the MeJA-responsiveness	MeJA-responsiveness
BnGRP16-Cnn	BnaCnng36370D		motif_sequence	1830	4	+	organism	short_function	short_function
BnGRP16-Cnn	BnaCnng36370D	G-box	TACGTG	1873	6	+	Arabidopsis thaliana	cis-acting regulatory element involved in light responsiveness	light response
BnGRP16-Cnn	BnaCnng36370D	ABRE	ACGTG	1874	5	+	Arabidopsis thaliana	cis-acting element involved in the abscisic acid responsiveness	abscisic acid responsiveness
BnGRP16-Cnn	BnaCnng36370D	CAAT-box	CAAAT	1947	5	+	Pisum sativum	common cis-acting element in promoter and enhancer regions	promoter and enhancer regions
BnGRP16-Cnn	BnaCnng36370D	ARE	AAACCA	1967	6	+	Zea mays	cis-acting regulatory element essential for the anaerobic induction	anaerobic induction
BnGRP16-Cnn	BnaCnng36370D	CAAT-box	CAAAT	1971	5	+	Pisum sativum	common cis-acting element in promoter and enhancer regions	promoter and enhancer regions
BnGRP16-Cnn	BnaCnng36370D	TATA-box	TATA	1990	4	-	Arabidopsis thaliana	core promoter element around -30 of transcription start	core promoter element transcription start
BnGRP19-Cnn	BnaCnng36380D	CAAT-box	CAAAT	21	5	+	Pisum sativum	common cis-acting element in promoter and enhancer regions	promoter and enhancer regions
BnGRP19-Cnn	BnaCnng36380D	TATA-box	ATTATA	24	6	+	Brassica napus	core promoter element around -30 of transcription start	core promoter element transcription start
BnGRP19-Cnn	BnaCnng36380D	TATA-box	TATAA	25	5	-	Arabidopsis thaliana	core promoter element around -30 of transcription start	core promoter element transcription start
BnGRP19-Cnn	BnaCnng36380D	TATA-box	TATA	26	4	+	Arabidopsis thaliana	core promoter element around -30 of transcription start	core promoter element transcription start
BnGRP19-Cnn	BnaCnng36380D	ATCT-motif	AATCTAATCC	31	9	-	Pisum sativum	part of a conserved DNA module involved in light responsiveness	light response
BnGRP19-Cnn	BnaCnng36380D		motif_sequence	50	4	+	organism	short_function	short_function
BnGRP19-Cnn	BnaCnng36380D	CAAT-box	CAAAT	107	5	+	Pisum sativum	common cis-acting element in promoter and enhancer regions	promoter and enhancer regions
BnGRP19-Cnn	BnaCnng36380D	TATA-box	ATATAT	121	6	+	Brassica napus	core promoter element around -30 of transcription start	core promoter element transcription start
BnGRP19-Cnn	BnaCnng36380D	TATA-box	TATA	122	4	+	Arabidopsis thaliana	core promoter element around -30 of transcription start	core promoter element transcription start
BnGRP19-Cnn	BnaCnng36380D		motif_sequence	125	4	+	organism	short_function	short_function
BnGRP19-Cnn	BnaCnng36380D	TATA-box	TACAAAA	128	7	+	Oryza sativa	core promoter element around -30 of transcription start	core promoter element transcription start
BnGRP19-Cnn	BnaCnng36380D	CAAT-box	CAAAT	137	5	-	Pisum sativum	common cis-acting element in promoter and enhancer regions	promoter and enhancer regions
BnGRP19-Cnn	BnaCnng36380D	TATA-box	ATATAT	150	6	+	Brassica napus	core promoter element around -30 of transcription start	core promoter element transcription start
BnGRP19-Cnn	BnaCnng36380D	TATA-box	TATA	151	4	+	Arabidopsis thaliana	core promoter element around -30 of transcription start	core promoter element transcription start
BnGRP19-Cnn	BnaCnng36380D	TATA-box	TATA	204	4	+	Arabidopsis thaliana	core promoter element around -30 of transcription start	core promoter element transcription start
BnGRP19-Cnn	BnaCnng36380D	CAAT-box	CAAAT	269	5	-	Pisum sativum	common cis-acting element in promoter and enhancer regions	promoter and enhancer regions
BnGRP19-Cnn	BnaCnng36380D	TATA-box	ATATAA	310	6	+	Brassica oleracea	core promoter element around -30 of transcription start	core promoter element transcription start
BnGRP19-Cnn	BnaCnng36380D	TATA-box	TATA	311	4	+	Arabidopsis thaliana	core promoter element around -30 of transcription start	core promoter element transcription start
BnGRP19-Cnn	BnaCnng36380D		motif_sequence	398	4	+	organism	short_function	short_function
BnGRP19-Cnn	BnaCnng36380D	CAAT-box	CAAAT	416	5	-	Pisum sativum	common cis-acting element in promoter and enhancer regions	promoter and enhancer regions
BnGRP19-Cnn	BnaCnng36380D	Box 4	ATTAAT	447	6	+	Petroselinum crispum	part of a conserved DNA module involved in light responsiveness	light response
BnGRP19-Cnn	BnaCnng36380D	LTR	CCGAAA	452	6	-	Hordeum vulgare	cis-acting element involved in low-temperature responsiveness	low-temperature responsiveness
BnGRP19-Cnn	BnaCnng36380D	ATCT-motif	AATCTAATCC	474	9	+	Pisum sativum	part of a conserved DNA module involved in light responsiveness	light response
BnGRP19-Cnn	BnaCnng36380D	MRE	AACCTAA	474	7	+	Petroselinum crispum	MYB binding site involved in light responsiveness	MYB binding site
BnGRP19-Cnn	BnaCnng36380D	TCA-element	CCATCTTTTT	485	9	+	Nicotiana tabacum	cis-acting element involved in salicylic acid responsiveness	salicylic acid responsiveness
BnGRP19-Cnn	BnaCnng36380D	TATA-box	ATTATA	502	6	+	Brassica napus	core promoter element around -30 of transcription start	core promoter element transcription start
BnGRP19-Cnn	BnaCnng36380D	TATA-box	TATAA	503	5	-	Arabidopsis thaliana	core promoter element around -30 of transcription start	core promoter element transcription start
BnGRP19-Cnn	BnaCnng36380D	TATA-box	TATA	504	4	+	Arabidopsis thaliana	core promoter element around -30 of transcription start	core promoter element transcription start
BnGRP19-Cnn	BnaCnng36380D	TATA-box	TATA	515	4	+	Arabidopsis thaliana	core promoter element around -30 of transcription start	core promoter element transcription start
BnGRP19-Cnn	BnaCnng36380D	Box 4	ATTAAT	524	6	+	Petroselinum crispum	part of a conserved DNA module involved in light responsiveness	light response
BnGRP19-Cnn	BnaCnng36380D	CAAT-box	CAAAT	528	5	-	Pisum sativum	common cis-acting element in promoter and enhancer regions	promoter and enhancer regions
BnGRP19-Cnn	BnaCnng36380D		motif_sequence	541	4	+	organism	short_function	short_function
BnGRP19-Cnn	BnaCnng36380D	TATA-box	taTATAAAtc	557	9	-	Arabidopsis thaliana	core promoter element around -30 of transcription start	core promoter element transcription start
BnGRP19-Cnn	BnaCnng36380D	TATA-box	TATAAAT	558	7	-	Brassica juncea	core promoter element around -30 of transcription start	core promoter element transcription start
BnGRP19-Cnn	BnaCnng36380D	TATA-box	TATAAA	559	6	-	Helianthus annuus	core promoter element around -30 of transcription start	core promoter element transcription start
BnGRP19-Cnn	BnaCnng36380D	TATA-box	TATATAA	560	7	-	Arabidopsis thaliana	core promoter element around -30 of transcription start	core promoter element transcription start
BnGRP19-Cnn	BnaCnng36380D	TATA-box	TATATA	561	6	+	Arabidopsis thaliana	core promoter element around -30 of transcription start	core promoter element transcription start
BnGRP19-Cnn	BnaCnng36380D	TATA-box	ATATAT	562	6	+	Brassica napus	core promoter element around -30 of transcription start	core promoter element transcription start
BnGRP19-Cnn	BnaCnng36380D	TATA-box	TATATA	563	6	+	Arabidopsis thaliana	core promoter element around -30 of transcription start	core promoter element transcription start
BnGRP19-Cnn	BnaCnng36380D	TATA-box	ATATAT	564	6	+	Brassica napus	core promoter element around -30 of transcription start	core promoter element transcription start
BnGRP19-Cnn	BnaCnng36380D	TATA-box	TATATA	565	6	+	Arabidopsis thaliana	core promoter element around -30 of transcription start	core promoter element transcription start
BnGRP19-Cnn	BnaCnng36380D	TATA-box	ATATAT	566	6	+	Brassica napus	core promoter element around -30 of transcription start	core promoter element transcription start
BnGRP19-Cnn	BnaCnng36380D	TATA-box	TATA	567	4	+	Arabidopsis thaliana	core promoter element around -30 of transcription start	core promoter element transcription start
BnGRP19-Cnn	BnaCnng36380D	CAAT-box	CCAAT	570	5	-	Arabidopsis thaliana	common cis-acting element in promoter and enhancer regions	promoter and enhancer regions
BnGRP19-Cnn	BnaCnng36380D	CAAT-box	CCAAT	624	5	-	Arabidopsis thaliana	common cis-acting element in promoter and enhancer regions	promoter and enhancer regions
BnGRP19-Cnn	BnaCnng36380D	Box 4	ATTAAT	636	6	+	Petroselinum crispum	part of a conserved DNA module involved in light responsiveness	light response
BnGRP19-Cnn	BnaCnng36380D		motif_sequence	645	4	+	organism	short_function	short_function
BnGRP19-Cnn	BnaCnng36380D	TATA-box	ATATAT	750	6	+	Brassica napus	core promoter element around -30 of transcription start	core promoter element transcription start
BnGRP19-Cnn	BnaCnng36380D	TATA-box	TATATA	751	6	+	Arabidopsis thaliana	core promoter element around -30 of transcription start	core promoter element transcription start
BnGRP19-Cnn	BnaCnng36380D	TATA-box	TATA	753	4	+	Arabidopsis thaliana	core promoter element around -30 of transcription start	core promoter element transcription start
BnGRP19-Cnn	BnaCnng36380D	TATA-box	ATATAT	787	6	+	Brassica napus	core promoter element around -30 of transcription start	core promoter element transcription start
BnGRP19-Cnn	BnaCnng36380D	TATA-box	TATATA	788	6	+	Arabidopsis thaliana	core promoter element around -30 of transcription start	core promoter element transcription start
BnGRP19-Cnn	BnaCnng36380D	TATA-box	ATATAA	789	6	+	Brassica oleracea	core promoter element around -30 of transcription start	core promoter element transcription start
BnGRP19-Cnn	BnaCnng36380D	TATA-box	TATA	790	4	+	Arabidopsis thaliana	core promoter element around -30 of transcription start	core promoter element transcription start
BnGRP19-Cnn	BnaCnng36380D	CAAT-box	CAAAT	829	5	+	Pisum sativum	common cis-acting element in promoter and enhancer regions	promoter and enhancer regions
BnGRP19-Cnn	BnaCnng36380D		motif_sequence	839	4	-	organism	short_function	short_function
BnGRP19-Cnn	BnaCnng36380D	CAAT-box	CAAAT	859	5	+	Pisum sativum	common cis-acting element in promoter and enhancer regions	promoter and enhancer regions
BnGRP19-Cnn	BnaCnng36380D	TATA-box	ATTATA	892	6	+	Brassica napus	core promoter element around -30 of transcription start	core promoter element transcription start
BnGRP19-Cnn	BnaCnng36380D	TATA-box	TATAA	893	5	-	Arabidopsis thaliana	core promoter element around -30 of transcription start	core promoter element transcription start
BnGRP19-Cnn	BnaCnng36380D	TATA-box	TATA	894	4	+	Arabidopsis thaliana	core promoter element around -30 of transcription start	core promoter element transcription start
BnGRP19-Cnn	BnaCnng36380D		motif_sequence	899	4	+	organism	short_function	short_function
BnGRP19-Cnn	BnaCnng36380D	CAAT-box	CAAAT	907	5	-	Pisum sativum	common cis-acting element in promoter and enhancer regions	promoter and enhancer regions
BnGRP19-Cnn	BnaCnng36380D	ARE	AAACCA	915	6	-	Zea mays	cis-acting regulatory element essential for the anaerobic induction	anaerobic induction
BnGRP19-Cnn	BnaCnng36380D	ATC-motif	AGTAATCT	958	8	-	Spinacia oleracea	part of a conserved DNA module involved in light responsiveness	light response
BnGRP19-Cnn	BnaCnng36380D	TATA-box	TATATA	965	6	+	Arabidopsis thaliana	core promoter element around -30 of transcription start	core promoter element transcription start
BnGRP19-Cnn	BnaCnng36380D	TATA-box	TATA	967	4	+	Arabidopsis thaliana	core promoter element around -30 of transcription start	core promoter element transcription start
BnGRP19-Cnn	BnaCnng36380D	AE-box	AGAAACAA	1012	8	-	Arabidopsis thaliana	part of a module for light response	light response
BnGRP19-Cnn	BnaCnng36380D	TATA-box	ccTATAAAaa	1101	9	-	Arabidopsis thaliana	core promoter element around -30 of transcription start	core promoter element transcription start
BnGRP19-Cnn	BnaCnng36380D	CAAT-box	CCAAT	1106	5	-	Arabidopsis thaliana	common cis-acting element in promoter and enhancer regions	promoter and enhancer regions
BnGRP19-Cnn	BnaCnng36380D		motif_sequence	1127	4	-	organism	short_function	short_function
BnGRP19-Cnn	BnaCnng36380D	CAAT-box	CAAAT	1150	5	+	Pisum sativum	common cis-acting element in promoter and enhancer regions	promoter and enhancer regions
BnGRP19-Cnn	BnaCnng36380D		motif_sequence	1206	4	-	organism	short_function	short_function
BnGRP19-Cnn	BnaCnng36380D	TATA-box	TATA	1219	4	-	Arabidopsis thaliana	core promoter element around -30 of transcription start	core promoter element transcription start
BnGRP19-Cnn	BnaCnng36380D	CAAT-box	CAAAT	1244	5	-	Pisum sativum	common cis-acting element in promoter and enhancer regions	promoter and enhancer regions
BnGRP19-Cnn	BnaCnng36380D	CAAT-box	CAAAT	1304	5	-	Pisum sativum	common cis-acting element in promoter and enhancer regions	promoter and enhancer regions
BnGRP19-Cnn	BnaCnng36380D	TATA-box	TATATAA	1313	7	-	Arabidopsis thaliana	core promoter element around -30 of transcription start	core promoter element transcription start
BnGRP19-Cnn	BnaCnng36380D	TATA-box	TATATA	1314	6	-	Arabidopsis thaliana	core promoter element around -30 of transcription start	core promoter element transcription start
BnGRP19-Cnn	BnaCnng36380D	TATA-box	ATATAA	1315	6	+	Brassica oleracea	core promoter element around -30 of transcription start	core promoter element transcription start
BnGRP19-Cnn	BnaCnng36380D	TATA-box	TATA	1316	4	-	Arabidopsis thaliana	core promoter element around -30 of transcription start	core promoter element transcription start
BnGRP19-Cnn	BnaCnng36380D	GT1-motif	GGTTAA	1322	6	-	Arabidopsis thaliana	light responsive element	light response
BnGRP19-Cnn	BnaCnng36380D	CAAT-box	CAAAT	1334	5	-	Pisum sativum	common cis-acting element in promoter and enhancer regions	promoter and enhancer regions
BnGRP19-Cnn	BnaCnng36380D	AE-box	AGAAACAA	1348	8	-	Arabidopsis thaliana	part of a module for light response	light response
BnGRP19-Cnn	BnaCnng36380D	G-box	TACGTG	1387	6	+	Arabidopsis thaliana	cis-acting regulatory element involved in light responsiveness	light response
BnGRP19-Cnn	BnaCnng36380D	ABRE	ACGTG	1388	5	+	Arabidopsis thaliana	cis-acting element involved in the abscisic acid responsiveness	abscisic acid responsiveness
BnGRP19-Cnn	BnaCnng36380D	chs-CMA2a	TCACTTGA	1410	8	-	Petroselinum crispum	part of a light responsive element	light response
BnGRP19-Cnn	BnaCnng36380D	TATA-box	TATA	1424	4	-	Arabidopsis thaliana	core promoter element around -30 of transcription start	core promoter element transcription start
BnGRP19-Cnn	BnaCnng36380D		motif_sequence	1460	4	+	organism	short_function	short_function
BnGRP19-Cnn	BnaCnng36380D	ABRE	ACGTG	1564	5	-	Arabidopsis thaliana	cis-acting element involved in the abscisic acid responsiveness	abscisic acid responsiveness
BnGRP19-Cnn	BnaCnng36380D	G-box	CACGTT	1564	6	+	Pisum sativum	cis-acting regulatory element involved in light responsiveness	light response
BnGRP19-Cnn	BnaCnng36380D	MBS	CAACTG	1621	6	+	Arabidopsis thaliana	MYB binding site involved in drought-inducibility	MYB binding site
BnGRP19-Cnn	BnaCnng36380D		motif_sequence	1626	4	-	organism	short_function	short_function
BnGRP19-Cnn	BnaCnng36380D	CAAT-box	CAAAT	1630	5	-	Pisum sativum	common cis-acting element in promoter and enhancer regions	promoter and enhancer regions
BnGRP19-Cnn	BnaCnng36380D	CAAT-box	CCAAT	1680	5	+	Arabidopsis thaliana	common cis-acting element in promoter and enhancer regions	promoter and enhancer regions
BnGRP19-Cnn	BnaCnng36380D	ARE	AAACCA	1719	6	+	Zea mays	cis-acting regulatory element essential for the anaerobic induction	anaerobic induction
BnGRP19-Cnn	BnaCnng36380D	TATA-box	ATATAT	1727	6	-	Brassica napus	core promoter element around -30 of transcription start	core promoter element transcription start
BnGRP19-Cnn	BnaCnng36380D	TATA-box	TATA	1728	4	-	Arabidopsis thaliana	core promoter element around -30 of transcription start	core promoter element transcription start
BnGRP19-Cnn	BnaCnng36380D	TATA-box	TATA	1744	4	-	Arabidopsis thaliana	core promoter element around -30 of transcription start	core promoter element transcription start
BnGRP19-Cnn	BnaCnng36380D	Box 4	ATTAAT	1747	6	-	Petroselinum crispum	part of a conserved DNA module involved in light responsiveness	light response
BnGRP19-Cnn	BnaCnng36380D	TATA-box	TATACA	1757	6	-	Helianthus annuus	core promoter element around -30 of transcription start	core promoter element transcription start
BnGRP19-Cnn	BnaCnng36380D	TATA-box	TATATA	1759	6	-	Arabidopsis thaliana	core promoter element around -30 of transcription start	core promoter element transcription start
BnGRP19-Cnn	BnaCnng36380D	TATA-box	ATATAT	1760	6	-	Brassica napus	core promoter element around -30 of transcription start	core promoter element transcription start
BnGRP19-Cnn	BnaCnng36380D	TATA-box	TATATA	1761	6	-	Arabidopsis thaliana	core promoter element around -30 of transcription start	core promoter element transcription start
BnGRP19-Cnn	BnaCnng36380D	TATA-box	ATATAT	1762	6	-	Brassica napus	core promoter element around -30 of transcription start	core promoter element transcription start
BnGRP19-Cnn	BnaCnng36380D	TATA-box	TATATTTATATTT	1763	12	+	Avena sativa	core promoter element around -30 of transcription start	core promoter element transcription start
BnGRP19-Cnn	BnaCnng36380D	CAAT-box	CAAAT	1796	5	+	Pisum sativum	common cis-acting element in promoter and enhancer regions	promoter and enhancer regions
BnGRP19-Cnn	BnaCnng36380D		motif_sequence	1848	4	-	organism	short_function	short_function
BnGRP19-Cnn	BnaCnng36380D		motif_sequence	1852	4	+	organism	short_function	short_function
BnGRP19-Cnn	BnaCnng36380D	G-box	TACGTG	1911	6	-	Arabidopsis thaliana	cis-acting regulatory element involved in light responsiveness	light response
BnGRP19-Cnn	BnaCnng36380D	ABRE	ACGTG	1911	5	-	Arabidopsis thaliana	cis-acting element involved in the abscisic acid responsiveness	abscisic acid responsiveness
BnGRP19-Cnn	BnaCnng36380D	CAAT-box	CAAAT	1960	5	+	Pisum sativum	common cis-acting element in promoter and enhancer regions	promoter and enhancer regions
BnGRP19-A10	BnaA10g30190D	CAAT-box	CAAAT	14	5	-	Pisum sativum	common cis-acting element in promoter and enhancer regions	promoter and enhancer regions
BnGRP19-A10	BnaA10g30190D	AE-box	AGAAACAA	16	8	-	Arabidopsis thaliana	part of a module for light response	light response
BnGRP19-A10	BnaA10g30190D	CAAT-box	CCAAT	41	5	-	Arabidopsis thaliana	common cis-acting element in promoter and enhancer regions	promoter and enhancer regions
BnGRP19-A10	BnaA10g30190D	CGTCA-motif	CGTCA	58	5	-	Hordeum vulgare	cis-acting regulatory element involved in the MeJA-responsiveness	MeJA-responsiveness
BnGRP19-A10	BnaA10g30190D	TGACG-motif	TGACG	58	5	+	Hordeum vulgare	cis-acting regulatory element involved in the MeJA-responsiveness	MeJA-responsiveness
BnGRP19-A10	BnaA10g30190D	TATA-box	ATATAT	64	6	+	Brassica napus	core promoter element around -30 of transcription start	core promoter element transcription start
BnGRP19-A10	BnaA10g30190D	TATA-box	TATA	65	4	+	Arabidopsis thaliana	core promoter element around -30 of transcription start	core promoter element transcription start
BnGRP19-A10	BnaA10g30190D	TATA-box	ATATAT	80	6	+	Brassica napus	core promoter element around -30 of transcription start	core promoter element transcription start
BnGRP19-A10	BnaA10g30190D	TATA-box	TATATA	81	6	+	Arabidopsis thaliana	core promoter element around -30 of transcription start	core promoter element transcription start
BnGRP19-A10	BnaA10g30190D	TATA-box	ATATAT	82	6	+	Brassica napus	core promoter element around -30 of transcription start	core promoter element transcription start
BnGRP19-A10	BnaA10g30190D	TATA-box	TATA	83	4	+	Arabidopsis thaliana	core promoter element around -30 of transcription start	core promoter element transcription start
BnGRP19-A10	BnaA10g30190D	TATA-box	TATAAAA	87	7	-	Pisum sativum	core promoter element around -30 of transcription start	core promoter element transcription start
BnGRP19-A10	BnaA10g30190D	TATA-box	TATAAA	88	6	-	Helianthus annuus	core promoter element around -30 of transcription start	core promoter element transcription start
BnGRP19-A10	BnaA10g30190D	TATA-box	TATAA	89	5	-	Arabidopsis thaliana	core promoter element around -30 of transcription start	core promoter element transcription start
BnGRP19-A10	BnaA10g30190D	TATA-box	TATA	90	4	+	Arabidopsis thaliana	core promoter element around -30 of transcription start	core promoter element transcription start
BnGRP19-A10	BnaA10g30190D	ARE	AAACCA	139	6	+	Zea mays	cis-acting regulatory element essential for the anaerobic induction	anaerobic induction
BnGRP19-A10	BnaA10g30190D	CAAT-box	CCAAT	142	5	+	Arabidopsis thaliana	common cis-acting element in promoter and enhancer regions	promoter and enhancer regions
BnGRP19-A10	BnaA10g30190D	TATA-box	ccTATAAAaa	176	9	+	Arabidopsis thaliana	core promoter element around -30 of transcription start	core promoter element transcription start
BnGRP19-A10	BnaA10g30190D	CAAT-box	CCAAT	176	5	+	Arabidopsis thaliana	common cis-acting element in promoter and enhancer regions	promoter and enhancer regions
BnGRP19-A10	BnaA10g30190D		motif_sequence	185	4	+	organism	short_function	short_function
BnGRP19-A10	BnaA10g30190D	CAAT-box	CAAAT	191	5	-	Pisum sativum	common cis-acting element in promoter and enhancer regions	promoter and enhancer regions
BnGRP19-A10	BnaA10g30190D	CAAT-box	CAAAT	203	5	+	Pisum sativum	common cis-acting element in promoter and enhancer regions	promoter and enhancer regions
BnGRP19-A10	BnaA10g30190D	CAAT-box	CAAAT	229	5	-	Pisum sativum	common cis-acting element in promoter and enhancer regions	promoter and enhancer regions
BnGRP19-A10	BnaA10g30190D	CAAT-box	CAAAT	290	5	+	Pisum sativum	common cis-acting element in promoter and enhancer regions	promoter and enhancer regions
BnGRP19-A10	BnaA10g30190D	TATA-box	ATTATA	293	6	+	Brassica napus	core promoter element around -30 of transcription start	core promoter element transcription start
BnGRP19-A10	BnaA10g30190D	TATA-box	TATAA	294	5	-	Arabidopsis thaliana	core promoter element around -30 of transcription start	core promoter element transcription start
BnGRP19-A10	BnaA10g30190D	TATA-box	TATA	295	4	+	Arabidopsis thaliana	core promoter element around -30 of transcription start	core promoter element transcription start
BnGRP19-A10	BnaA10g30190D	ATCT-motif	AATCTAATCC	300	9	-	Pisum sativum	part of a conserved DNA module involved in light responsiveness	light response
BnGRP19-A10	BnaA10g30190D		motif_sequence	319	4	+	organism	short_function	short_function
BnGRP19-A10	BnaA10g30190D	CAAT-box	CAAAT	376	5	+	Pisum sativum	common cis-acting element in promoter and enhancer regions	promoter and enhancer regions
BnGRP19-A10	BnaA10g30190D	TATA-box	ATATAT	390	6	+	Brassica napus	core promoter element around -30 of transcription start	core promoter element transcription start
BnGRP19-A10	BnaA10g30190D	TATA-box	TATA	391	4	+	Arabidopsis thaliana	core promoter element around -30 of transcription start	core promoter element transcription start
BnGRP19-A10	BnaA10g30190D	CAAT-box	CAAAT	410	5	-	Pisum sativum	common cis-acting element in promoter and enhancer regions	promoter and enhancer regions
BnGRP19-A10	BnaA10g30190D		motif_sequence	421	4	-	organism	short_function	short_function
BnGRP19-A10	BnaA10g30190D	TATA-box	TATA	477	4	+	Arabidopsis thaliana	core promoter element around -30 of transcription start	core promoter element transcription start
BnGRP19-A10	BnaA10g30190D	CAAT-box	CCAAT	505	5	-	Arabidopsis thaliana	common cis-acting element in promoter and enhancer regions	promoter and enhancer regions
BnGRP19-A10	BnaA10g30190D	TATA-box	TATAA	518	5	-	Arabidopsis thaliana	core promoter element around -30 of transcription start	core promoter element transcription start
BnGRP19-A10	BnaA10g30190D	TATA-box	TATA	519	4	+	Arabidopsis thaliana	core promoter element around -30 of transcription start	core promoter element transcription start
BnGRP19-A10	BnaA10g30190D	CAAT-box	CAAAT	541	5	-	Pisum sativum	common cis-acting element in promoter and enhancer regions	promoter and enhancer regions
BnGRP19-A10	BnaA10g30190D	TATA-box	ATATAA	582	6	+	Brassica oleracea	core promoter element around -30 of transcription start	core promoter element transcription start
BnGRP19-A10	BnaA10g30190D	TATA-box	TATA	583	4	+	Arabidopsis thaliana	core promoter element around -30 of transcription start	core promoter element transcription start
BnGRP19-A10	BnaA10g30190D		motif_sequence	670	4	+	organism	short_function	short_function
BnGRP19-A10	BnaA10g30190D	CAAT-box	CAAAT	688	5	-	Pisum sativum	common cis-acting element in promoter and enhancer regions	promoter and enhancer regions
BnGRP19-A10	BnaA10g30190D	Box 4	ATTAAT	719	6	+	Petroselinum crispum	part of a conserved DNA module involved in light responsiveness	light response
BnGRP19-A10	BnaA10g30190D	LTR	CCGAAA	724	6	-	Hordeum vulgare	cis-acting element involved in low-temperature responsiveness	low-temperature responsiveness
BnGRP19-A10	BnaA10g30190D	MRE	AACCTAA	746	7	+	Petroselinum crispum	MYB binding site involved in light responsiveness	MYB binding site
BnGRP19-A10	BnaA10g30190D	ATCT-motif	AATCTAATCC	746	9	+	Pisum sativum	part of a conserved DNA module involved in light responsiveness	light response
BnGRP19-A10	BnaA10g30190D	TCA-element	CCATCTTTTT	757	9	+	Nicotiana tabacum	cis-acting element involved in salicylic acid responsiveness	salicylic acid responsiveness
BnGRP19-A10	BnaA10g30190D	TATA-box	ATTATA	774	6	+	Brassica napus	core promoter element around -30 of transcription start	core promoter element transcription start
BnGRP19-A10	BnaA10g30190D	TATA-box	TATAA	775	5	-	Arabidopsis thaliana	core promoter element around -30 of transcription start	core promoter element transcription start
BnGRP19-A10	BnaA10g30190D	TATA-box	TATA	776	4	+	Arabidopsis thaliana	core promoter element around -30 of transcription start	core promoter element transcription start
BnGRP19-A10	BnaA10g30190D		motif_sequence	782	4	-	organism	short_function	short_function
BnGRP19-A10	BnaA10g30190D	TATA-box	ATATAA	786	6	+	Brassica oleracea	core promoter element around -30 of transcription start	core promoter element transcription start
BnGRP19-A10	BnaA10g30190D	TATA-box	TATA	787	4	+	Arabidopsis thaliana	core promoter element around -30 of transcription start	core promoter element transcription start
BnGRP19-A10	BnaA10g30190D	TATA-box	ATATAA	791	6	+	Brassica oleracea	core promoter element around -30 of transcription start	core promoter element transcription start
BnGRP19-A10	BnaA10g30190D	TATA-box	TATA	792	4	+	Arabidopsis thaliana	core promoter element around -30 of transcription start	core promoter element transcription start
BnGRP19-A10	BnaA10g30190D	Box 4	ATTAAT	796	6	+	Petroselinum crispum	part of a conserved DNA module involved in light responsiveness	light response
BnGRP19-A10	BnaA10g30190D	CAAT-box	CAAAT	800	5	-	Pisum sativum	common cis-acting element in promoter and enhancer regions	promoter and enhancer regions
BnGRP19-A10	BnaA10g30190D		motif_sequence	813	4	+	organism	short_function	short_function
BnGRP19-A10	BnaA10g30190D	TATA-box	taTATAAAg	830	9	-	Lycopersicon esculentum	core promoter element around -30 of transcription start	core promoter element transcription start
BnGRP19-A10	BnaA10g30190D	TATA-box	TATAAA	831	6	-	Helianthus annuus	core promoter element around -30 of transcription start	core promoter element transcription start
BnGRP19-A10	BnaA10g30190D	TATA-box	TATATAA	832	7	-	Arabidopsis thaliana	core promoter element around -30 of transcription start	core promoter element transcription start
BnGRP19-A10	BnaA10g30190D	TATA-box	TATATA	833	6	+	Arabidopsis thaliana	core promoter element around -30 of transcription start	core promoter element transcription start
BnGRP19-A10	BnaA10g30190D	TATA-box	ATATAT	834	6	+	Brassica napus	core promoter element around -30 of transcription start	core promoter element transcription start
BnGRP19-A10	BnaA10g30190D	TATA-box	TATATA	835	6	+	Arabidopsis thaliana	core promoter element around -30 of transcription start	core promoter element transcription start
BnGRP19-A10	BnaA10g30190D	TATA-box	ATATAA	836	6	+	Brassica oleracea	core promoter element around -30 of transcription start	core promoter element transcription start
BnGRP19-A10	BnaA10g30190D	TATA-box	TATA	837	4	+	Arabidopsis thaliana	core promoter element around -30 of transcription start	core promoter element transcription start
BnGRP19-A10	BnaA10g30190D	CAAT-box	CCAAT	859	5	-	Arabidopsis thaliana	common cis-acting element in promoter and enhancer regions	promoter and enhancer regions
BnGRP19-A10	BnaA10g30190D	Box 4	ATTAAT	906	6	+	Petroselinum crispum	part of a conserved DNA module involved in light responsiveness	light response
BnGRP19-A10	BnaA10g30190D		motif_sequence	915	4	+	organism	short_function	short_function
BnGRP19-A10	BnaA10g30190D	I-box	cCATATCCAAT	924	10	-	Flaveria trinervia	part of a light responsive element	light response
BnGRP19-A10	BnaA10g30190D		motif_sequence	1016	4	-	organism	short_function	short_function
BnGRP19-A10	BnaA10g30190D	TATA-box	ATATAT	1024	6	-	Brassica napus	core promoter element around -30 of transcription start	core promoter element transcription start
BnGRP19-A10	BnaA10g30190D	TATA-box	TATATA	1025	6	-	Arabidopsis thaliana	core promoter element around -30 of transcription start	core promoter element transcription start
BnGRP19-A10	BnaA10g30190D	TATA-box	TATA	1027	4	-	Arabidopsis thaliana	core promoter element around -30 of transcription start	core promoter element transcription start
BnGRP19-A10	BnaA10g30190D	TATA-box	ATATAT	1061	6	-	Brassica napus	core promoter element around -30 of transcription start	core promoter element transcription start
BnGRP19-A10	BnaA10g30190D	TATA-box	TATATA	1062	6	-	Arabidopsis thaliana	core promoter element around -30 of transcription start	core promoter element transcription start
BnGRP19-A10	BnaA10g30190D	TATA-box	ATATAA	1063	6	+	Brassica oleracea	core promoter element around -30 of transcription start	core promoter element transcription start
BnGRP19-A10	BnaA10g30190D	TATA-box	TATA	1064	4	-	Arabidopsis thaliana	core promoter element around -30 of transcription start	core promoter element transcription start
BnGRP19-A10	BnaA10g30190D	CAAT-box	CAAAT	1082	5	+	Pisum sativum	common cis-acting element in promoter and enhancer regions	promoter and enhancer regions
BnGRP19-A10	BnaA10g30190D	CAAT-box	CAAAT	1112	5	+	Pisum sativum	common cis-acting element in promoter and enhancer regions	promoter and enhancer regions
BnGRP19-A10	BnaA10g30190D	TATA-box	ATTATA	1145	6	+	Brassica napus	core promoter element around -30 of transcription start	core promoter element transcription start
BnGRP19-A10	BnaA10g30190D	TATA-box	TATAA	1146	5	-	Arabidopsis thaliana	core promoter element around -30 of transcription start	core promoter element transcription start
BnGRP19-A10	BnaA10g30190D	TATA-box	TATA	1147	4	-	Arabidopsis thaliana	core promoter element around -30 of transcription start	core promoter element transcription start
BnGRP19-A10	BnaA10g30190D	CAAT-box	CAAAT	1160	5	-	Pisum sativum	common cis-acting element in promoter and enhancer regions	promoter and enhancer regions
BnGRP19-A10	BnaA10g30190D	CAAT-box	CAAAT	1297	5	-	Pisum sativum	common cis-acting element in promoter and enhancer regions	promoter and enhancer regions
BnGRP19-A10	BnaA10g30190D	TATA-box	TATAA	1306	5	-	Arabidopsis thaliana	core promoter element around -30 of transcription start	core promoter element transcription start
BnGRP19-A10	BnaA10g30190D	TATA-box	TATA	1307	4	-	Arabidopsis thaliana	core promoter element around -30 of transcription start	core promoter element transcription start
BnGRP19-A10	BnaA10g30190D	GT1-motif	GGTTAA	1315	6	-	Arabidopsis thaliana	light responsive element	light response
BnGRP19-A10	BnaA10g30190D	CAAT-box	CAAAT	1327	5	-	Pisum sativum	common cis-acting element in promoter and enhancer regions	promoter and enhancer regions
BnGRP19-A10	BnaA10g30190D	AE-box	AGAAACAA	1341	8	-	Arabidopsis thaliana	part of a module for light response	light response
BnGRP19-A10	BnaA10g30190D	chs-CMA2a	TCACTTGA	1403	8	-	Petroselinum crispum	part of a light responsive element	light response
BnGRP19-A10	BnaA10g30190D	TATA-box	TATA	1417	4	-	Arabidopsis thaliana	core promoter element around -30 of transcription start	core promoter element transcription start
BnGRP19-A10	BnaA10g30190D	TATA-box	ATATAA	1441	6	+	Brassica oleracea	core promoter element around -30 of transcription start	core promoter element transcription start
BnGRP19-A10	BnaA10g30190D	TATA-box	TATA	1442	4	-	Arabidopsis thaliana	core promoter element around -30 of transcription start	core promoter element transcription start
BnGRP19-A10	BnaA10g30190D	TATA-box	TATA	1450	4	-	Arabidopsis thaliana	core promoter element around -30 of transcription start	core promoter element transcription start
BnGRP19-A10	BnaA10g30190D		motif_sequence	1459	4	+	organism	short_function	short_function
BnGRP19-A10	BnaA10g30190D	ABRE	ACGTG	1565	5	-	Arabidopsis thaliana	cis-acting element involved in the abscisic acid responsiveness	abscisic acid responsiveness
BnGRP19-A10	BnaA10g30190D	G-box	CACGTT	1565	6	+	Pisum sativum	cis-acting regulatory element involved in light responsiveness	light response
BnGRP19-A10	BnaA10g30190D	CAAT-box	CCAAT	1598	5	-	Arabidopsis thaliana	common cis-acting element in promoter and enhancer regions	promoter and enhancer regions
BnGRP19-A10	BnaA10g30190D	MBS	CAACTG	1623	6	+	Arabidopsis thaliana	MYB binding site involved in drought-inducibility	MYB binding site
BnGRP19-A10	BnaA10g30190D		motif_sequence	1628	4	-	organism	short_function	short_function
BnGRP19-A10	BnaA10g30190D	CAAT-box	CAAAT	1632	5	-	Pisum sativum	common cis-acting element in promoter and enhancer regions	promoter and enhancer regions
BnGRP19-A10	BnaA10g30190D		motif_sequence	1691	4	+	organism	short_function	short_function
BnGRP19-A10	BnaA10g30190D	CAAT-box	CCAAT	1726	5	+	Arabidopsis thaliana	common cis-acting element in promoter and enhancer regions	promoter and enhancer regions
BnGRP19-A10	BnaA10g30190D	TATA-box	ATATAT	1729	6	-	Brassica napus	core promoter element around -30 of transcription start	core promoter element transcription start
BnGRP19-A10	BnaA10g30190D	TATA-box	TATATA	1730	6	-	Arabidopsis thaliana	core promoter element around -30 of transcription start	core promoter element transcription start
BnGRP19-A10	BnaA10g30190D	TATA-box	ATATAT	1731	6	-	Brassica napus	core promoter element around -30 of transcription start	core promoter element transcription start
BnGRP19-A10	BnaA10g30190D	TATA-box	TATA	1732	4	-	Arabidopsis thaliana	core promoter element around -30 of transcription start	core promoter element transcription start
BnGRP19-A10	BnaA10g30190D	TATA-box	TATA	1744	4	-	Arabidopsis thaliana	core promoter element around -30 of transcription start	core promoter element transcription start
BnGRP19-A10	BnaA10g30190D	Box 4	ATTAAT	1747	6	-	Petroselinum crispum	part of a conserved DNA module involved in light responsiveness	light response
BnGRP19-A10	BnaA10g30190D	CAAT-box	CAAAT	1796	5	+	Pisum sativum	common cis-acting element in promoter and enhancer regions	promoter and enhancer regions
BnGRP19-A10	BnaA10g30190D		motif_sequence	1848	4	-	organism	short_function	short_function
BnGRP19-A10	BnaA10g30190D		motif_sequence	1852	4	+	organism	short_function	short_function
BnGRP19-A10	BnaA10g30190D	G-box	TACGTG	1911	6	-	Arabidopsis thaliana	cis-acting regulatory element involved in light responsiveness	light response
BnGRP19-A10	BnaA10g30190D	ABRE	ACGTG	1911	5	-	Arabidopsis thaliana	cis-acting element involved in the abscisic acid responsiveness	abscisic acid responsiveness
BnGRP19-A10	BnaA10g30190D	CAAT-box	CAAAT	1960	5	+	Pisum sativum	common cis-acting element in promoter and enhancer regions	promoter and enhancer regions
BnGRP19-A10	BnaA10g30190D	CAAT-box	CAAAT	1979	5	-	Pisum sativum	common cis-acting element in promoter and enhancer regions	promoter and enhancer regions
BnGRP19-A10	BnaA10g30190D		motif_sequence	1983	4	-	organism	short_function	short_function
BnGRP19-A03	BnaA03g02120D	TGACG-motif	TGACG	13	5	-	Hordeum vulgare	cis-acting regulatory element involved in the MeJA-responsiveness	MeJA-responsiveness
BnGRP19-A03	BnaA03g02120D	CGTCA-motif	CGTCA	13	5	+	Hordeum vulgare	cis-acting regulatory element involved in the MeJA-responsiveness	MeJA-responsiveness
BnGRP19-A03	BnaA03g02120D	CAAT-box	CAAAT	36	5	+	Pisum sativum	common cis-acting element in promoter and enhancer regions	promoter and enhancer regions
BnGRP19-A03	BnaA03g02120D	TATA-box	TACAAAA	40	7	-	Oryza sativa	core promoter element around -30 of transcription start	core promoter element transcription start
BnGRP19-A03	BnaA03g02120D	TATA-box	TATATA	50	6	+	Arabidopsis thaliana	core promoter element around -30 of transcription start	core promoter element transcription start
BnGRP19-A03	BnaA03g02120D	TATA-box	ATATAA	51	6	+	Brassica oleracea	core promoter element around -30 of transcription start	core promoter element transcription start
BnGRP19-A03	BnaA03g02120D	TATA-box	TATA	52	4	+	Arabidopsis thaliana	core promoter element around -30 of transcription start	core promoter element transcription start
BnGRP19-A03	BnaA03g02120D	LTR	CCGAAA	60	6	+	Hordeum vulgare	cis-acting element involved in low-temperature responsiveness	low-temperature responsiveness
BnGRP19-A03	BnaA03g02120D	CAAT-box	CAAAT	68	5	+	Pisum sativum	common cis-acting element in promoter and enhancer regions	promoter and enhancer regions
BnGRP19-A03	BnaA03g02120D	TATA-box	taTATAAAtc	72	9	-	Arabidopsis thaliana	core promoter element around -30 of transcription start	core promoter element transcription start
BnGRP19-A03	BnaA03g02120D	TATA-box	TATAAAT	73	7	-	Brassica juncea	core promoter element around -30 of transcription start	core promoter element transcription start
BnGRP19-A03	BnaA03g02120D	TATA-box	TATAAA	74	6	-	Helianthus annuus	core promoter element around -30 of transcription start	core promoter element transcription start
BnGRP19-A03	BnaA03g02120D	TATA-box	TATATAA	75	7	-	Arabidopsis thaliana	core promoter element around -30 of transcription start	core promoter element transcription start
BnGRP19-A03	BnaA03g02120D	TATA-box	TATATA	76	6	+	Arabidopsis thaliana	core promoter element around -30 of transcription start	core promoter element transcription start
BnGRP19-A03	BnaA03g02120D	TATA-box	TATA	78	4	+	Arabidopsis thaliana	core promoter element around -30 of transcription start	core promoter element transcription start
BnGRP19-A03	BnaA03g02120D	CAAT-box	CAAAT	112	5	-	Pisum sativum	common cis-acting element in promoter and enhancer regions	promoter and enhancer regions
BnGRP19-A03	BnaA03g02120D	CAAT-box	CAAAT	126	5	+	Pisum sativum	common cis-acting element in promoter and enhancer regions	promoter and enhancer regions
BnGRP19-A03	BnaA03g02120D	CAAT-box	CCAAT	138	5	+	Arabidopsis thaliana	common cis-acting element in promoter and enhancer regions	promoter and enhancer regions
BnGRP19-A03	BnaA03g02120D	TATA-box	ATATAT	150	6	+	Brassica napus	core promoter element around -30 of transcription start	core promoter element transcription start
BnGRP19-A03	BnaA03g02120D	TATA-box	TATATA	151	6	+	Arabidopsis thaliana	core promoter element around -30 of transcription start	core promoter element transcription start
BnGRP19-A03	BnaA03g02120D	TATA-box	ATATAT	152	6	+	Brassica napus	core promoter element around -30 of transcription start	core promoter element transcription start
BnGRP19-A03	BnaA03g02120D	TATA-box	TATATA	153	6	+	Arabidopsis thaliana	core promoter element around -30 of transcription start	core promoter element transcription start
BnGRP19-A03	BnaA03g02120D	TATA-box	ATATAA	154	6	+	Brassica oleracea	core promoter element around -30 of transcription start	core promoter element transcription start
BnGRP19-A03	BnaA03g02120D	TATA-box	TATA	155	4	+	Arabidopsis thaliana	core promoter element around -30 of transcription start	core promoter element transcription start
BnGRP19-A03	BnaA03g02120D	Box 4	ATTAAT	171	6	+	Petroselinum crispum	part of a conserved DNA module involved in light responsiveness	light response
BnGRP19-A03	BnaA03g02120D	CAAT-box	CAAAT	210	5	+	Pisum sativum	common cis-acting element in promoter and enhancer regions	promoter and enhancer regions
BnGRP19-A03	BnaA03g02120D	CAAT-box	CAAAT	294	5	-	Pisum sativum	common cis-acting element in promoter and enhancer regions	promoter and enhancer regions
BnGRP19-A03	BnaA03g02120D	GT1-motif	GGTTAAT	301	7	+	Avena sativa	light responsive element	light response
BnGRP19-A03	BnaA03g02120D	TATA-box	TATAAAA	309	7	-	Pisum sativum	core promoter element around -30 of transcription start	core promoter element transcription start
BnGRP19-A03	BnaA03g02120D	TATA-box	TATAAA	310	6	-	Helianthus annuus	core promoter element around -30 of transcription start	core promoter element transcription start
BnGRP19-A03	BnaA03g02120D	TATA-box	TATATAA	311	7	-	Arabidopsis thaliana	core promoter element around -30 of transcription start	core promoter element transcription start
BnGRP19-A03	BnaA03g02120D	TATA-box	TATATA	312	6	+	Arabidopsis thaliana	core promoter element around -30 of transcription start	core promoter element transcription start
BnGRP19-A03	BnaA03g02120D	TATA-box	ATATAA	313	6	+	Brassica oleracea	core promoter element around -30 of transcription start	core promoter element transcription start
BnGRP19-A03	BnaA03g02120D	TATA-box	TATA	314	4	+	Arabidopsis thaliana	core promoter element around -30 of transcription start	core promoter element transcription start
BnGRP19-A03	BnaA03g02120D	TATA-box	TATAAAA	328	7	-	Pisum sativum	core promoter element around -30 of transcription start	core promoter element transcription start
BnGRP19-A03	BnaA03g02120D	TATA-box	TATAAA	329	6	-	Helianthus annuus	core promoter element around -30 of transcription start	core promoter element transcription start
BnGRP19-A03	BnaA03g02120D	TATA-box	TATAA	330	5	-	Arabidopsis thaliana	core promoter element around -30 of transcription start	core promoter element transcription start
BnGRP19-A03	BnaA03g02120D	TATA-box	TATA	331	4	+	Arabidopsis thaliana	core promoter element around -30 of transcription start	core promoter element transcription start
BnGRP19-A03	BnaA03g02120D	CAAT-box	CAAAT	434	5	+	Pisum sativum	common cis-acting element in promoter and enhancer regions	promoter and enhancer regions
BnGRP19-A03	BnaA03g02120D	CAAT-box	CAAAT	465	5	+	Pisum sativum	common cis-acting element in promoter and enhancer regions	promoter and enhancer regions
BnGRP19-A03	BnaA03g02120D	O2-site	GATGA(C/T)(A/G)TG(A/G)	470	8.5	+	Zea mays	cis-acting regulatory element involved in zein metabolism regulation	zein metabolism regulation
BnGRP19-A03	BnaA03g02120D	TATA-box	TATA	489	4	+	Arabidopsis thaliana	core promoter element around -30 of transcription start	core promoter element transcription start
BnGRP19-A03	BnaA03g02120D	TATA-box	TATATAA	496	7	-	Arabidopsis thaliana	core promoter element around -30 of transcription start	core promoter element transcription start
BnGRP19-A03	BnaA03g02120D	TATA-box	TATATA	497	6	+	Arabidopsis thaliana	core promoter element around -30 of transcription start	core promoter element transcription start
BnGRP19-A03	BnaA03g02120D	TATA-box	ATATAA	498	6	+	Brassica oleracea	core promoter element around -30 of transcription start	core promoter element transcription start
BnGRP19-A03	BnaA03g02120D	TATA-box	TATA	499	4	+	Arabidopsis thaliana	core promoter element around -30 of transcription start	core promoter element transcription start
BnGRP19-A03	BnaA03g02120D	GT1-motif	GGTTAA	523	6	-	Arabidopsis thaliana	light responsive element	light response
BnGRP19-A03	BnaA03g02120D	G-box	CCACGTAA	552	8	-	Brassica napus	cis-acting regulatory element involved in light responsiveness	light response
BnGRP19-A03	BnaA03g02120D	G-box	TACGTG	553	6	+	Arabidopsis thaliana	cis-acting regulatory element involved in light responsiveness	light response
BnGRP19-A03	BnaA03g02120D	ABRE	ACGTG	554	5	+	Arabidopsis thaliana	cis-acting element involved in the abscisic acid responsiveness	abscisic acid responsiveness
BnGRP19-A03	BnaA03g02120D	CAAT-box	CAAAT	578	5	+	Pisum sativum	common cis-acting element in promoter and enhancer regions	promoter and enhancer regions
BnGRP19-A03	BnaA03g02120D	GARE-motif	TCTGTTG	646	7	-	Brassica oleracea	gibberellin-responsive element	gibberellin-responsive
BnGRP19-A03	BnaA03g02120D	CAAT-box	CAAAT	681	5	+	Pisum sativum	common cis-acting element in promoter and enhancer regions	promoter and enhancer regions
BnGRP19-A03	BnaA03g02120D	CAAT-box	CAAAT	693	5	+	Pisum sativum	common cis-acting element in promoter and enhancer regions	promoter and enhancer regions
BnGRP19-A03	BnaA03g02120D	TATA-box	ATATAT	696	6	+	Brassica napus	core promoter element around -30 of transcription start	core promoter element transcription start
BnGRP19-A03	BnaA03g02120D	TATA-box	TATATA	697	6	+	Arabidopsis thaliana	core promoter element around -30 of transcription start	core promoter element transcription start
BnGRP19-A03	BnaA03g02120D	TATA-box	ATATAA	698	6	+	Brassica oleracea	core promoter element around -30 of transcription start	core promoter element transcription start
BnGRP19-A03	BnaA03g02120D	TATA-box	TATA	699	4	+	Arabidopsis thaliana	core promoter element around -30 of transcription start	core promoter element transcription start
BnGRP19-A03	BnaA03g02120D	CAAT-box	CAAAT	720	5	+	Pisum sativum	common cis-acting element in promoter and enhancer regions	promoter and enhancer regions
BnGRP19-A03	BnaA03g02120D		motif_sequence	740	4	+	organism	short_function	short_function
BnGRP19-A03	BnaA03g02120D	CAAT-box	CAAAT	747	5	+	Pisum sativum	common cis-acting element in promoter and enhancer regions	promoter and enhancer regions
BnGRP19-A03	BnaA03g02120D	TATA-box	TATA	781	4	+	Arabidopsis thaliana	core promoter element around -30 of transcription start	core promoter element transcription start
BnGRP19-A03	BnaA03g02120D		motif_sequence	816	4	-	organism	short_function	short_function
BnGRP19-A03	BnaA03g02120D	CAAT-box	CAAAT	843	5	-	Pisum sativum	common cis-acting element in promoter and enhancer regions	promoter and enhancer regions
BnGRP19-A03	BnaA03g02120D		motif_sequence	850	4	+	organism	short_function	short_function
BnGRP19-A03	BnaA03g02120D	TATA-box	TATA	859	4	+	Arabidopsis thaliana	core promoter element around -30 of transcription start	core promoter element transcription start
BnGRP19-A03	BnaA03g02120D		motif_sequence	863	4	+	organism	short_function	short_function
BnGRP19-A03	BnaA03g02120D		motif_sequence	870	4	+	organism	short_function	short_function
BnGRP19-A03	BnaA03g02120D	TATA-box	TATA	879	4	+	Arabidopsis thaliana	core promoter element around -30 of transcription start	core promoter element transcription start
BnGRP19-A03	BnaA03g02120D	TATA-box	TATA	892	4	+	Arabidopsis thaliana	core promoter element around -30 of transcription start	core promoter element transcription start
BnGRP19-A03	BnaA03g02120D	TATA-box	ATTATA	895	6	+	Brassica napus	core promoter element around -30 of transcription start	core promoter element transcription start
BnGRP19-A03	BnaA03g02120D	TATA-box	TATAA	896	5	-	Arabidopsis thaliana	core promoter element around -30 of transcription start	core promoter element transcription start
BnGRP19-A03	BnaA03g02120D	TATA-box	TATA	897	4	+	Arabidopsis thaliana	core promoter element around -30 of transcription start	core promoter element transcription start
BnGRP19-A03	BnaA03g02120D	TATA-box	TATA	909	4	+	Arabidopsis thaliana	core promoter element around -30 of transcription start	core promoter element transcription start
BnGRP19-A03	BnaA03g02120D	LAMP-element	CTTTATCA	1019	8	+	Pisum sativum	part of a light responsive element	light response
BnGRP19-A03	BnaA03g02120D	CAAT-box	CAAAT	1055	5	+	Pisum sativum	common cis-acting element in promoter and enhancer regions	promoter and enhancer regions
BnGRP19-A03	BnaA03g02120D	TATA-box	TATACA	1114	6	-	Helianthus annuus	core promoter element around -30 of transcription start	core promoter element transcription start
BnGRP19-A03	BnaA03g02120D	TATA-box	TATA	1116	4	-	Arabidopsis thaliana	core promoter element around -30 of transcription start	core promoter element transcription start
BnGRP19-A03	BnaA03g02120D		motif_sequence	1146	4	-	organism	short_function	short_function
BnGRP19-A03	BnaA03g02120D	O2-site	GTTGACGTGA	1174	9	-	Zea mays	cis-acting regulatory element involved in zein metabolism regulation	zein metabolism regulation
BnGRP19-A03	BnaA03g02120D	ARE	AAACCA	1188	6	+	Zea mays	cis-acting regulatory element essential for the anaerobic induction	anaerobic induction
BnGRP19-A03	BnaA03g02120D	GT1-motif	GGTTAA	1199	6	-	Arabidopsis thaliana	light responsive element	light response
BnGRP19-A03	BnaA03g02120D	ARE	AAACCA	1210	6	+	Zea mays	cis-acting regulatory element essential for the anaerobic induction	anaerobic induction
BnGRP19-A03	BnaA03g02120D	TATA-box	TATATA	1227	6	-	Arabidopsis thaliana	core promoter element around -30 of transcription start	core promoter element transcription start
BnGRP19-A03	BnaA03g02120D	TATA-box	TATA	1229	4	-	Arabidopsis thaliana	core promoter element around -30 of transcription start	core promoter element transcription start
BnGRP19-A03	BnaA03g02120D	CAAT-box	CAAAT	1262	5	-	Pisum sativum	common cis-acting element in promoter and enhancer regions	promoter and enhancer regions
BnGRP19-A03	BnaA03g02120D	Box 4	ATTAAT	1336	6	-	Petroselinum crispum	part of a conserved DNA module involved in light responsiveness	light response
BnGRP19-A03	BnaA03g02120D	TATA-box	TATATA	1410	6	-	Arabidopsis thaliana	core promoter element around -30 of transcription start	core promoter element transcription start
BnGRP19-A03	BnaA03g02120D	TATA-box	TATA	1412	4	-	Arabidopsis thaliana	core promoter element around -30 of transcription start	core promoter element transcription start
BnGRP19-A03	BnaA03g02120D	CAAT-box	CAAAT	1426	5	+	Pisum sativum	common cis-acting element in promoter and enhancer regions	promoter and enhancer regions
BnGRP19-A03	BnaA03g02120D	Box 4	ATTAAT	1429	6	-	Petroselinum crispum	part of a conserved DNA module involved in light responsiveness	light response
BnGRP19-A03	BnaA03g02120D	CAAT-box	CAAAT	1459	5	+	Pisum sativum	common cis-acting element in promoter and enhancer regions	promoter and enhancer regions
BnGRP19-A03	BnaA03g02120D	TATA-box	TATAA	1510	5	-	Arabidopsis thaliana	core promoter element around -30 of transcription start	core promoter element transcription start
BnGRP19-A03	BnaA03g02120D	TATA-box	TATA	1511	4	-	Arabidopsis thaliana	core promoter element around -30 of transcription start	core promoter element transcription start
BnGRP19-A03	BnaA03g02120D	GARE-motif	TCTGTTG	1530	7	+	Brassica oleracea	gibberellin-responsive element	gibberellin-responsive
BnGRP19-A03	BnaA03g02120D	GATA-motif	GATAGGG	1587	7	-	Pisum sativum	part of a light responsive element	light response
BnGRP19-A03	BnaA03g02120D	Box 4	ATTAAT	1596	6	-	Petroselinum crispum	part of a conserved DNA module involved in light responsiveness	light response
BnGRP19-A03	BnaA03g02120D		motif_sequence	1603	4	-	organism	short_function	short_function
BnGRP19-A03	BnaA03g02120D	TATA-box	TATA	1621	4	-	Arabidopsis thaliana	core promoter element around -30 of transcription start	core promoter element transcription start
BnGRP19-A03	BnaA03g02120D	TATA-box	TATAA	1633	5	-	Arabidopsis thaliana	core promoter element around -30 of transcription start	core promoter element transcription start
BnGRP19-A03	BnaA03g02120D	TATA-box	TATA	1634	4	-	Arabidopsis thaliana	core promoter element around -30 of transcription start	core promoter element transcription start
BnGRP19-A03	BnaA03g02120D	CAAT-box	CCAAT	1677	5	+	Arabidopsis thaliana	common cis-acting element in promoter and enhancer regions	promoter and enhancer regions
BnGRP19-A03	BnaA03g02120D	TATA-box	TATA	1697	4	-	Arabidopsis thaliana	core promoter element around -30 of transcription start	core promoter element transcription start
BnGRP19-A03	BnaA03g02120D	CAT-box	GCCACT	1719	6	+	Arabidopsis thaliana	cis-acting regulatory element related to meristem expression	meristem expression
BnGRP19-A03	BnaA03g02120D	TATA-box	TATA	1734	4	-	Arabidopsis thaliana	core promoter element around -30 of transcription start	core promoter element transcription start
BnGRP19-A03	BnaA03g02120D	TATA-box	TATACA	1747	6	-	Helianthus annuus	core promoter element around -30 of transcription start	core promoter element transcription start
BnGRP19-A03	BnaA03g02120D	TATA-box	TATA	1749	4	-	Arabidopsis thaliana	core promoter element around -30 of transcription start	core promoter element transcription start
BnGRP19-A03	BnaA03g02120D	GATA-motif	AAGGATAAGG	1769	9	+	Solanum tuberosum	part of a light responsive element	light response
BnGRP19-A03	BnaA03g02120D	G-box	TAAACGTG	1784	8	+	Brassica oleracea	cis-acting regulatory element involved in light responsiveness	light response
BnGRP19-A03	BnaA03g02120D	G-box	CACGTT	1786	6	-	Pisum sativum	cis-acting regulatory element involved in light responsiveness	light response
BnGRP19-A03	BnaA03g02120D	ABRE	ACGTG	1787	5	+	Arabidopsis thaliana	cis-acting element involved in the abscisic acid responsiveness	abscisic acid responsiveness
BnGRP19-A03	BnaA03g02120D	TATA-box	ATATAA	1795	6	+	Brassica oleracea	core promoter element around -30 of transcription start	core promoter element transcription start
BnGRP19-A03	BnaA03g02120D	TATA-box	TATA	1796	4	-	Arabidopsis thaliana	core promoter element around -30 of transcription start	core promoter element transcription start
BnGRP19-A03	BnaA03g02120D	TATA-box	TATA	1821	4	-	Arabidopsis thaliana	core promoter element around -30 of transcription start	core promoter element transcription start
BnGRP19-A03	BnaA03g02120D	CAT-box	GCCACT	1830	6	-	Arabidopsis thaliana	cis-acting regulatory element related to meristem expression	meristem expression
BnGRP19-A03	BnaA03g02120D	CGTCA-motif	CGTCA	1837	5	-	Hordeum vulgare	cis-acting regulatory element involved in the MeJA-responsiveness	MeJA-responsiveness
BnGRP19-A03	BnaA03g02120D	TGA-box	TGACGTAA	1837	8	+	Glycine max	part of an auxin-responsive element	auxin responsive
BnGRP19-A03	BnaA03g02120D	TGACG-motif	TGACG	1837	5	+	Hordeum vulgare	cis-acting regulatory element involved in the MeJA-responsiveness	MeJA-responsiveness
BnGRP19-A03	BnaA03g02120D	G-box	TACGTG	1905	6	-	Arabidopsis thaliana	cis-acting regulatory element involved in light responsiveness	light response
BnGRP19-A03	BnaA03g02120D	ABRE	ACGTG	1905	5	-	Arabidopsis thaliana	cis-acting element involved in the abscisic acid responsiveness	abscisic acid responsiveness
BnGRP19-A03	BnaA03g02120D	ARE	AAACCA	1957	6	+	Zea mays	cis-acting regulatory element essential for the anaerobic induction	anaerobic induction
BnGRP19-A03	BnaA03g02120D		motif_sequence	1980	4	+	organism	short_function	short_function
BnGRP19-C03	BnaC03g03150D	CAAT-box	CAAAT	29	5	-	Pisum sativum	common cis-acting element in promoter and enhancer regions	promoter and enhancer regions
BnGRP19-C03	BnaC03g03150D	CAAT-box	CAAAT	50	5	+	Pisum sativum	common cis-acting element in promoter and enhancer regions	promoter and enhancer regions
BnGRP19-C03	BnaC03g03150D	TATA-box	TATA	114	4	+	Arabidopsis thaliana	core promoter element around -30 of transcription start	core promoter element transcription start
BnGRP19-C03	BnaC03g03150D	TATA-box	ATTATA	141	6	+	Brassica napus	core promoter element around -30 of transcription start	core promoter element transcription start
BnGRP19-C03	BnaC03g03150D	TATA-box	TATAA	142	5	-	Arabidopsis thaliana	core promoter element around -30 of transcription start	core promoter element transcription start
BnGRP19-C03	BnaC03g03150D	TATA-box	TATA	143	4	+	Arabidopsis thaliana	core promoter element around -30 of transcription start	core promoter element transcription start
BnGRP19-C03	BnaC03g03150D	WUN-motif	AAATTTCCT	150	9	-	Brassica oleracea	wound-responsive element	wound-responsive element
BnGRP19-C03	BnaC03g03150D	GT1-motif	GGTTAA	161	6	+	Arabidopsis thaliana	light responsive element	light response
BnGRP19-C03	BnaC03g03150D	TGACG-motif	TGACG	196	5	-	Hordeum vulgare	cis-acting regulatory element involved in the MeJA-responsiveness	MeJA-responsiveness
BnGRP19-C03	BnaC03g03150D	CGTCA-motif	CGTCA	196	5	+	Hordeum vulgare	cis-acting regulatory element involved in the MeJA-responsiveness	MeJA-responsiveness
BnGRP19-C03	BnaC03g03150D	CAAT-box	CAAAT	219	5	+	Pisum sativum	common cis-acting element in promoter and enhancer regions	promoter and enhancer regions
BnGRP19-C03	BnaC03g03150D	TATA-box	TACAAAA	223	7	-	Oryza sativa	core promoter element around -30 of transcription start	core promoter element transcription start
BnGRP19-C03	BnaC03g03150D	TATA-box	TATATA	233	6	+	Arabidopsis thaliana	core promoter element around -30 of transcription start	core promoter element transcription start
BnGRP19-C03	BnaC03g03150D	TATA-box	ATATAA	234	6	+	Brassica oleracea	core promoter element around -30 of transcription start	core promoter element transcription start
BnGRP19-C03	BnaC03g03150D	TATA-box	TATA	235	4	+	Arabidopsis thaliana	core promoter element around -30 of transcription start	core promoter element transcription start
BnGRP19-C03	BnaC03g03150D	LTR	CCGAAA	243	6	+	Hordeum vulgare	cis-acting element involved in low-temperature responsiveness	low-temperature responsiveness
BnGRP19-C03	BnaC03g03150D	CAAT-box	CAAAT	251	5	+	Pisum sativum	common cis-acting element in promoter and enhancer regions	promoter and enhancer regions
BnGRP19-C03	BnaC03g03150D	TATA-box	taTATAAAtc	255	9	-	Arabidopsis thaliana	core promoter element around -30 of transcription start	core promoter element transcription start
BnGRP19-C03	BnaC03g03150D	TATA-box	TATAAAT	256	7	-	Brassica juncea	core promoter element around -30 of transcription start	core promoter element transcription start
BnGRP19-C03	BnaC03g03150D	TATA-box	TATAAA	257	6	-	Helianthus annuus	core promoter element around -30 of transcription start	core promoter element transcription start
BnGRP19-C03	BnaC03g03150D	TATA-box	TATATAA	258	7	-	Arabidopsis thaliana	core promoter element around -30 of transcription start	core promoter element transcription start
BnGRP19-C03	BnaC03g03150D	TATA-box	TATATA	259	6	+	Arabidopsis thaliana	core promoter element around -30 of transcription start	core promoter element transcription start
BnGRP19-C03	BnaC03g03150D	TATA-box	TATA	261	4	+	Arabidopsis thaliana	core promoter element around -30 of transcription start	core promoter element transcription start
BnGRP19-C03	BnaC03g03150D	CAAT-box	CAAAT	296	5	-	Pisum sativum	common cis-acting element in promoter and enhancer regions	promoter and enhancer regions
BnGRP19-C03	BnaC03g03150D	ARE	AAACCA	301	6	-	Zea mays	cis-acting regulatory element essential for the anaerobic induction	anaerobic induction
BnGRP19-C03	BnaC03g03150D	CAAT-box	CAAAT	311	5	+	Pisum sativum	common cis-acting element in promoter and enhancer regions	promoter and enhancer regions
BnGRP19-C03	BnaC03g03150D	CAAT-box	CCAAT	323	5	+	Arabidopsis thaliana	common cis-acting element in promoter and enhancer regions	promoter and enhancer regions
BnGRP19-C03	BnaC03g03150D	TATA-box	ATATAT	335	6	+	Brassica napus	core promoter element around -30 of transcription start	core promoter element transcription start
BnGRP19-C03	BnaC03g03150D	TATA-box	TATATA	336	6	+	Arabidopsis thaliana	core promoter element around -30 of transcription start	core promoter element transcription start
BnGRP19-C03	BnaC03g03150D	TATA-box	ATATAT	337	6	+	Brassica napus	core promoter element around -30 of transcription start	core promoter element transcription start
BnGRP19-C03	BnaC03g03150D	TATA-box	TATATA	338	6	+	Arabidopsis thaliana	core promoter element around -30 of transcription start	core promoter element transcription start
BnGRP19-C03	BnaC03g03150D	TATA-box	ATATAA	339	6	+	Brassica oleracea	core promoter element around -30 of transcription start	core promoter element transcription start
BnGRP19-C03	BnaC03g03150D	TATA-box	TATA	340	4	+	Arabidopsis thaliana	core promoter element around -30 of transcription start	core promoter element transcription start
BnGRP19-C03	BnaC03g03150D	CAAT-box	CAAAT	397	5	+	Pisum sativum	common cis-acting element in promoter and enhancer regions	promoter and enhancer regions
BnGRP19-C03	BnaC03g03150D	CAAT-box	CAAAT	481	5	-	Pisum sativum	common cis-acting element in promoter and enhancer regions	promoter and enhancer regions
BnGRP19-C03	BnaC03g03150D	GT1-motif	GGTTAAT	488	7	+	Avena sativa	light responsive element	light response
BnGRP19-C03	BnaC03g03150D	TATA-box	TATAAAA	496	7	-	Pisum sativum	core promoter element around -30 of transcription start	core promoter element transcription start
BnGRP19-C03	BnaC03g03150D	TATA-box	TATAAA	497	6	-	Helianthus annuus	core promoter element around -30 of transcription start	core promoter element transcription start
BnGRP19-C03	BnaC03g03150D	TATA-box	TATATAA	498	7	-	Arabidopsis thaliana	core promoter element around -30 of transcription start	core promoter element transcription start
BnGRP19-C03	BnaC03g03150D	TATA-box	TATATA	499	6	+	Arabidopsis thaliana	core promoter element around -30 of transcription start	core promoter element transcription start
BnGRP19-C03	BnaC03g03150D	TATA-box	ATATAA	500	6	+	Brassica oleracea	core promoter element around -30 of transcription start	core promoter element transcription start
BnGRP19-C03	BnaC03g03150D	TATA-box	TATA	501	4	+	Arabidopsis thaliana	core promoter element around -30 of transcription start	core promoter element transcription start
BnGRP19-C03	BnaC03g03150D	TCT-motif	TCTTAC	515	6	+	Arabidopsis thaliana	part of a light responsive element	light response
BnGRP19-C03	BnaC03g03150D	CAAT-box	CAAAT	553	5	-	Pisum sativum	common cis-acting element in promoter and enhancer regions	promoter and enhancer regions
BnGRP19-C03	BnaC03g03150D	CAAT-box	CAAAT	615	5	+	Pisum sativum	common cis-acting element in promoter and enhancer regions	promoter and enhancer regions
BnGRP19-C03	BnaC03g03150D	CAAT-box	CAAAT	646	5	+	Pisum sativum	common cis-acting element in promoter and enhancer regions	promoter and enhancer regions
BnGRP19-C03	BnaC03g03150D	O2-site	GATGA(C/T)(A/G)TG(A/G)	651	8.5	+	Zea mays	cis-acting regulatory element involved in zein metabolism regulation	zein metabolism regulation
BnGRP19-C03	BnaC03g03150D	TATA-box	TATA	670	4	+	Arabidopsis thaliana	core promoter element around -30 of transcription start	core promoter element transcription start
BnGRP19-C03	BnaC03g03150D	TATA-box	TATATAA	677	7	-	Arabidopsis thaliana	core promoter element around -30 of transcription start	core promoter element transcription start
BnGRP19-C03	BnaC03g03150D	TATA-box	TATATA	678	6	+	Arabidopsis thaliana	core promoter element around -30 of transcription start	core promoter element transcription start
BnGRP19-C03	BnaC03g03150D	TATA-box	ATATAA	679	6	+	Brassica oleracea	core promoter element around -30 of transcription start	core promoter element transcription start
BnGRP19-C03	BnaC03g03150D	TATA-box	TATA	680	4	+	Arabidopsis thaliana	core promoter element around -30 of transcription start	core promoter element transcription start
BnGRP19-C03	BnaC03g03150D	CAAT-box	CAAAT	690	5	+	Pisum sativum	common cis-acting element in promoter and enhancer regions	promoter and enhancer regions
BnGRP19-C03	BnaC03g03150D	GT1-motif	GGTTAA	704	6	-	Arabidopsis thaliana	light responsive element	light response
BnGRP19-C03	BnaC03g03150D	TCA-element	CCATCTTTTT	709	9	+	Nicotiana tabacum	cis-acting element involved in salicylic acid responsiveness	salicylic acid responsiveness
BnGRP19-C03	BnaC03g03150D	TATA-box	ccTATAAAaa	715	9	-	Arabidopsis thaliana	core promoter element around -30 of transcription start	core promoter element transcription start
BnGRP19-C03	BnaC03g03150D	TATA-box	TATAAAA	716	7	-	Pisum sativum	core promoter element around -30 of transcription start	core promoter element transcription start
BnGRP19-C03	BnaC03g03150D	TATA-box	TATAAA	717	6	-	Helianthus annuus	core promoter element around -30 of transcription start	core promoter element transcription start
BnGRP19-C03	BnaC03g03150D	TATA-box	TATAA	718	5	-	Arabidopsis thaliana	core promoter element around -30 of transcription start	core promoter element transcription start
BnGRP19-C03	BnaC03g03150D	TATA-box	TATA	719	4	+	Arabidopsis thaliana	core promoter element around -30 of transcription start	core promoter element transcription start
BnGRP19-C03	BnaC03g03150D	G-box	CCACGTAA	733	8	-	Brassica napus	cis-acting regulatory element involved in light responsiveness	light response
BnGRP19-C03	BnaC03g03150D	G-box	TACGTG	734	6	+	Arabidopsis thaliana	cis-acting regulatory element involved in light responsiveness	light response
BnGRP19-C03	BnaC03g03150D	ABRE	ACGTG	735	5	+	Arabidopsis thaliana	cis-acting element involved in the abscisic acid responsiveness	abscisic acid responsiveness
BnGRP19-C03	BnaC03g03150D	CAAT-box	CAAAT	759	5	+	Pisum sativum	common cis-acting element in promoter and enhancer regions	promoter and enhancer regions
BnGRP19-C03	BnaC03g03150D	Box 4	ATTAAT	772	6	+	Petroselinum crispum	part of a conserved DNA module involved in light responsiveness	light response
BnGRP19-C03	BnaC03g03150D	G-box	CACGAC	782	6	-	Zea mays	cis-acting regulatory element involved in light responsiveness	light response
BnGRP19-C03	BnaC03g03150D	CAAT-box	CAAAT	802	5	+	Pisum sativum	common cis-acting element in promoter and enhancer regions	promoter and enhancer regions
BnGRP19-C03	BnaC03g03150D	CAAT-box	CAAAT	815	5	-	Pisum sativum	common cis-acting element in promoter and enhancer regions	promoter and enhancer regions
BnGRP19-C03	BnaC03g03150D		motif_sequence	822	4	+	organism	short_function	short_function
BnGRP19-C03	BnaC03g03150D	TATA-box	TATA	831	4	+	Arabidopsis thaliana	core promoter element around -30 of transcription start	core promoter element transcription start
BnGRP19-C03	BnaC03g03150D		motif_sequence	835	4	+	organism	short_function	short_function
BnGRP19-C03	BnaC03g03150D		motif_sequence	842	4	+	organism	short_function	short_function
BnGRP19-C03	BnaC03g03150D	TATA-box	TATA	851	4	+	Arabidopsis thaliana	core promoter element around -30 of transcription start	core promoter element transcription start
BnGRP19-C03	BnaC03g03150D	CAAT-box	CAAAT	855	5	+	Pisum sativum	common cis-acting element in promoter and enhancer regions	promoter and enhancer regions
BnGRP19-C03	BnaC03g03150D	TATA-box	TATACA	862	6	-	Helianthus annuus	core promoter element around -30 of transcription start	core promoter element transcription start
BnGRP19-C03	BnaC03g03150D	TATA-box	TATA	864	4	+	Arabidopsis thaliana	core promoter element around -30 of transcription start	core promoter element transcription start
BnGRP19-C03	BnaC03g03150D	TATA-box	TATA	881	4	+	Arabidopsis thaliana	core promoter element around -30 of transcription start	core promoter element transcription start
BnGRP19-C03	BnaC03g03150D	LAMP-element	CTTTATCA	977	8	+	Pisum sativum	part of a light responsive element	light response
BnGRP19-C03	BnaC03g03150D	CAAT-box	CAAAT	984	5	-	Pisum sativum	common cis-acting element in promoter and enhancer regions	promoter and enhancer regions
BnGRP19-C03	BnaC03g03150D	CAAT-box	CAAAT	1013	5	+	Pisum sativum	common cis-acting element in promoter and enhancer regions	promoter and enhancer regions
BnGRP19-C03	BnaC03g03150D		motif_sequence	1104	4	-	organism	short_function	short_function
BnGRP19-C03	BnaC03g03150D	O2-site	GTTGACGTGA	1132	9	-	Zea mays	cis-acting regulatory element involved in zein metabolism regulation	zein metabolism regulation
BnGRP19-C03	BnaC03g03150D	ARE	AAACCA	1146	6	+	Zea mays	cis-acting regulatory element essential for the anaerobic induction	anaerobic induction
BnGRP19-C03	BnaC03g03150D	GT1-motif	GGTTAA	1157	6	-	Arabidopsis thaliana	light responsive element	light response
BnGRP19-C03	BnaC03g03150D	ARE	AAACCA	1168	6	+	Zea mays	cis-acting regulatory element essential for the anaerobic induction	anaerobic induction
BnGRP19-C03	BnaC03g03150D	TATA-box	TATATA	1185	6	-	Arabidopsis thaliana	core promoter element around -30 of transcription start	core promoter element transcription start
BnGRP19-C03	BnaC03g03150D	TATA-box	TATA	1187	4	-	Arabidopsis thaliana	core promoter element around -30 of transcription start	core promoter element transcription start
BnGRP19-C03	BnaC03g03150D	TATA-box	TATATA	1382	6	-	Arabidopsis thaliana	core promoter element around -30 of transcription start	core promoter element transcription start
BnGRP19-C03	BnaC03g03150D	TATA-box	TATA	1384	4	-	Arabidopsis thaliana	core promoter element around -30 of transcription start	core promoter element transcription start
BnGRP19-C03	BnaC03g03150D	CAAT-box	CAAAT	1398	5	+	Pisum sativum	common cis-acting element in promoter and enhancer regions	promoter and enhancer regions
BnGRP19-C03	BnaC03g03150D	Box 4	ATTAAT	1401	6	-	Petroselinum crispum	part of a conserved DNA module involved in light responsiveness	light response
BnGRP19-C03	BnaC03g03150D	CAAT-box	CAAAT	1435	5	+	Pisum sativum	common cis-acting element in promoter and enhancer regions	promoter and enhancer regions
BnGRP19-C03	BnaC03g03150D	TATA-box	ATTATA	1500	6	+	Brassica napus	core promoter element around -30 of transcription start	core promoter element transcription start
BnGRP19-C03	BnaC03g03150D	TATA-box	TATAA	1501	5	-	Arabidopsis thaliana	core promoter element around -30 of transcription start	core promoter element transcription start
BnGRP19-C03	BnaC03g03150D	TATA-box	TATA	1502	4	-	Arabidopsis thaliana	core promoter element around -30 of transcription start	core promoter element transcription start
BnGRP19-C03	BnaC03g03150D	TATA-box	TATAA	1511	5	-	Arabidopsis thaliana	core promoter element around -30 of transcription start	core promoter element transcription start
BnGRP19-C03	BnaC03g03150D	TATA-box	TATA	1512	4	-	Arabidopsis thaliana	core promoter element around -30 of transcription start	core promoter element transcription start
BnGRP19-C03	BnaC03g03150D	GARE-motif	TCTGTTG	1518	7	+	Brassica oleracea	gibberellin-responsive element	gibberellin-responsive
BnGRP19-C03	BnaC03g03150D	GATA-motif	GATAGGG	1576	7	-	Pisum sativum	part of a light responsive element	light response
BnGRP19-C03	BnaC03g03150D	Box 4	ATTAAT	1585	6	-	Petroselinum crispum	part of a conserved DNA module involved in light responsiveness	light response
BnGRP19-C03	BnaC03g03150D		motif_sequence	1592	4	-	organism	short_function	short_function
BnGRP19-C03	BnaC03g03150D	CAAT-box	CAAAT	1613	5	+	Pisum sativum	common cis-acting element in promoter and enhancer regions	promoter and enhancer regions
BnGRP19-C03	BnaC03g03150D	TATA-box	TATAA	1636	5	-	Arabidopsis thaliana	core promoter element around -30 of transcription start	core promoter element transcription start
BnGRP19-C03	BnaC03g03150D	TATA-box	TATA	1637	4	-	Arabidopsis thaliana	core promoter element around -30 of transcription start	core promoter element transcription start
BnGRP19-C03	BnaC03g03150D	CAAT-box	CCAAT	1678	5	+	Arabidopsis thaliana	common cis-acting element in promoter and enhancer regions	promoter and enhancer regions
BnGRP19-C03	BnaC03g03150D	TATA-box	TATA	1697	4	-	Arabidopsis thaliana	core promoter element around -30 of transcription start	core promoter element transcription start
BnGRP19-C03	BnaC03g03150D	TATA-box	ATATAT	1703	6	-	Brassica napus	core promoter element around -30 of transcription start	core promoter element transcription start
BnGRP19-C03	BnaC03g03150D	TATA-box	TATA	1704	4	-	Arabidopsis thaliana	core promoter element around -30 of transcription start	core promoter element transcription start
BnGRP19-C03	BnaC03g03150D		motif_sequence	1714	4	-	organism	short_function	short_function
BnGRP19-C03	BnaC03g03150D	CAT-box	GCCACT	1723	6	+	Arabidopsis thaliana	cis-acting regulatory element related to meristem expression	meristem expression
BnGRP19-C03	BnaC03g03150D	TATA-box	TATA	1738	4	-	Arabidopsis thaliana	core promoter element around -30 of transcription start	core promoter element transcription start
BnGRP19-C03	BnaC03g03150D	TATA-box	TATACA	1747	6	-	Helianthus annuus	core promoter element around -30 of transcription start	core promoter element transcription start
BnGRP19-C03	BnaC03g03150D	TATA-box	TATA	1749	4	-	Arabidopsis thaliana	core promoter element around -30 of transcription start	core promoter element transcription start
BnGRP19-C03	BnaC03g03150D	GATA-motif	AAGGATAAGG	1769	9	+	Solanum tuberosum	part of a light responsive element	light response
BnGRP19-C03	BnaC03g03150D	CAAT-box	CAAAT	1780	5	+	Pisum sativum	common cis-acting element in promoter and enhancer regions	promoter and enhancer regions
BnGRP19-C03	BnaC03g03150D	G-box	TAAACGTG	1784	8	+	Brassica oleracea	cis-acting regulatory element involved in light responsiveness	light response
BnGRP19-C03	BnaC03g03150D	G-box	CACGTT	1786	6	-	Pisum sativum	cis-acting regulatory element involved in light responsiveness	light response
BnGRP19-C03	BnaC03g03150D	ABRE	ACGTG	1787	5	+	Arabidopsis thaliana	cis-acting element involved in the abscisic acid responsiveness	abscisic acid responsiveness
BnGRP19-C03	BnaC03g03150D	TATA-box	ATATAA	1795	6	+	Brassica oleracea	core promoter element around -30 of transcription start	core promoter element transcription start
BnGRP19-C03	BnaC03g03150D	TATA-box	TATA	1796	4	-	Arabidopsis thaliana	core promoter element around -30 of transcription start	core promoter element transcription start
BnGRP19-C03	BnaC03g03150D	TATA-box	TATA	1821	4	-	Arabidopsis thaliana	core promoter element around -30 of transcription start	core promoter element transcription start
BnGRP19-C03	BnaC03g03150D	CGTCA-motif	CGTCA	1837	5	-	Hordeum vulgare	cis-acting regulatory element involved in the MeJA-responsiveness	MeJA-responsiveness
BnGRP19-C03	BnaC03g03150D	TGA-box	TGACGTAA	1837	8	+	Glycine max	part of an auxin-responsive element	auxin responsive
BnGRP19-C03	BnaC03g03150D	TGACG-motif	TGACG	1837	5	+	Hordeum vulgare	cis-acting regulatory element involved in the MeJA-responsiveness	MeJA-responsiveness
BnGRP19-C03	BnaC03g03150D	G-box	TACGTG	1905	6	-	Arabidopsis thaliana	cis-acting regulatory element involved in light responsiveness	light response
BnGRP19-C03	BnaC03g03150D	ABRE	ACGTG	1905	5	-	Arabidopsis thaliana	cis-acting element involved in the abscisic acid responsiveness	abscisic acid responsiveness
BnGRP19-C03	BnaC03g03150D	CAAT-box	CAAAT	1977	5	+	Pisum sativum	common cis-acting element in promoter and enhancer regions	promoter and enhancer regions
BnGRP19-C03	BnaC03g03150D		motif_sequence	1980	4	+	organism	short_function	short_function
BnOLEO11-C07	BnaC07g31360D	CAAT-box	CCAAT	19	5	+	Arabidopsis thaliana	common cis-acting element in promoter and enhancer regions	promoter and enhancer regions
BnOLEO11-C07	BnaC07g31360D	CAAT-box	CCAAT	43	5	+	Arabidopsis thaliana	common cis-acting element in promoter and enhancer regions	promoter and enhancer regions
BnOLEO11-C07	BnaC07g31360D		motif_sequence	114	4	+	organism	short_function	short_function
BnOLEO11-C07	BnaC07g31360D	TATA-box	ATTATA	130	6	+	Brassica napus	core promoter element around -30 of transcription start	core promoter element transcription start
BnOLEO11-C07	BnaC07g31360D	TATA-box	TATAA	131	5	-	Arabidopsis thaliana	core promoter element around -30 of transcription start	core promoter element transcription start
BnOLEO11-C07	BnaC07g31360D	TATA-box	TATA	132	4	+	Arabidopsis thaliana	core promoter element around -30 of transcription start	core promoter element transcription start
BnOLEO11-C07	BnaC07g31360D	TATA-box	TATA	155	4	+	Arabidopsis thaliana	core promoter element around -30 of transcription start	core promoter element transcription start
BnOLEO11-C07	BnaC07g31360D	TATA-box	TATA	185	4	+	Arabidopsis thaliana	core promoter element around -30 of transcription start	core promoter element transcription start
BnOLEO11-C07	BnaC07g31360D	Sp1	GGGCGG	215	6	+	Oryza sativa	light responsive element	light response
BnOLEO11-C07	BnaC07g31360D	TATA-box	TATA	225	4	+	Arabidopsis thaliana	core promoter element around -30 of transcription start	core promoter element transcription start
BnOLEO11-C07	BnaC07g31360D	CAAT-box	CAAAT	235	5	+	Pisum sativum	common cis-acting element in promoter and enhancer regions	promoter and enhancer regions
BnOLEO11-C07	BnaC07g31360D	TATA-box	TATTTAAA	256	8	-	Arabidopsis thaliana	core promoter element around -30 of transcription start	core promoter element transcription start
BnOLEO11-C07	BnaC07g31360D	TCA-element	CCATCTTTTT	293	9	+	Nicotiana tabacum	cis-acting element involved in salicylic acid responsiveness	salicylic acid responsiveness
BnOLEO11-C07	BnaC07g31360D	TATA-box	ATATAT	370	6	+	Brassica napus	core promoter element around -30 of transcription start	core promoter element transcription start
BnOLEO11-C07	BnaC07g31360D	TATA-box	TATA	371	4	+	Arabidopsis thaliana	core promoter element around -30 of transcription start	core promoter element transcription start
BnOLEO11-C07	BnaC07g31360D		motif_sequence	380	4	-	organism	short_function	short_function
BnOLEO11-C07	BnaC07g31360D	Box 4	ATTAAT	393	6	+	Petroselinum crispum	part of a conserved DNA module involved in light responsiveness	light response
BnOLEO11-C07	BnaC07g31360D	Box 4	ATTAAT	427	6	+	Petroselinum crispum	part of a conserved DNA module involved in light responsiveness	light response
BnOLEO11-C07	BnaC07g31360D	TATA-box	TATTTAAA	459	8	+	Arabidopsis thaliana	core promoter element around -30 of transcription start	core promoter element transcription start
BnOLEO11-C07	BnaC07g31360D	AT-rich sequence	TAAAATACT	463	9	+	Pisum sativum	element for maximal elicitor-mediated activation (2copies)	maximal elicitor-mediated activation
BnOLEO11-C07	BnaC07g31360D	TC-rich repeats	GTTTTCTTAC	501	9	+	Nicotiana tabacum	cis-acting element involved in defense and stress responsiveness	defense and stress responsiveness
BnOLEO11-C07	BnaC07g31360D	CAAT-box	CAAAT	515	5	+	Pisum sativum	common cis-acting element in promoter and enhancer regions	promoter and enhancer regions
BnOLEO11-C07	BnaC07g31360D	CAAT-box	CAAAT	564	5	-	Pisum sativum	common cis-acting element in promoter and enhancer regions	promoter and enhancer regions
BnOLEO11-C07	BnaC07g31360D	TCA-element	CCATCTTTTT	596	9	+	Nicotiana tabacum	cis-acting element involved in salicylic acid responsiveness	salicylic acid responsiveness
BnOLEO11-C07	BnaC07g31360D	CAAT-box	CCAAT	685	5	-	Arabidopsis thaliana	common cis-acting element in promoter and enhancer regions	promoter and enhancer regions
BnOLEO11-C07	BnaC07g31360D	CAAT-box	CAAAT	713	5	-	Pisum sativum	common cis-acting element in promoter and enhancer regions	promoter and enhancer regions
BnOLEO11-C07	BnaC07g31360D	MSA-like	(T/C)C(T/C)AACGG(T/C)(T/C)A	784	8.5	+	Catharanthus roseus	cis-acting element involved in cell cycle regulation	cell cycle regulation
BnOLEO11-C07	BnaC07g31360D	CCAAT-box	CAACGG	786	6	+	Hordeum vulgare	MYBHv1 binding site	MYBHv1 binding site
BnOLEO11-C07	BnaC07g31360D	Box 4	ATTAAT	805	6	+	Petroselinum crispum	part of a conserved DNA module involved in light responsiveness	light response
BnOLEO11-C07	BnaC07g31360D	Box 4	ATTAAT	954	6	+	Petroselinum crispum	part of a conserved DNA module involved in light responsiveness	light response
BnOLEO11-C07	BnaC07g31360D	TATA-box	ATATAT	964	6	+	Brassica napus	core promoter element around -30 of transcription start	core promoter element transcription start
BnOLEO11-C07	BnaC07g31360D	TATA-box	TATATA	965	6	+	Arabidopsis thaliana	core promoter element around -30 of transcription start	core promoter element transcription start
BnOLEO11-C07	BnaC07g31360D	TATA-box	TATA	967	4	+	Arabidopsis thaliana	core promoter element around -30 of transcription start	core promoter element transcription start
BnOLEO11-C07	BnaC07g31360D	TATA-box	ATTATA	988	6	+	Brassica napus	core promoter element around -30 of transcription start	core promoter element transcription start
BnOLEO11-C07	BnaC07g31360D	TATA-box	TATATAA	989	7	-	Arabidopsis thaliana	core promoter element around -30 of transcription start	core promoter element transcription start
BnOLEO11-C07	BnaC07g31360D	TATA-box	TATATA	990	6	+	Arabidopsis thaliana	core promoter element around -30 of transcription start	core promoter element transcription start
BnOLEO11-C07	BnaC07g31360D	TATA-box	ATATAA	991	6	+	Brassica oleracea	core promoter element around -30 of transcription start	core promoter element transcription start
BnOLEO11-C07	BnaC07g31360D	TATA-box	TATA	992	4	+	Arabidopsis thaliana	core promoter element around -30 of transcription start	core promoter element transcription start
BnOLEO11-C07	BnaC07g31360D	GT1-motif	GGTTAA	1014	6	-	Arabidopsis thaliana	light responsive element	light response
BnOLEO11-C07	BnaC07g31360D	HD-Zip 1	CAAT(A/T)ATTG	1023	8.5	-	Arabidopsis thaliana	element involved in differentiation of the palisade mesophyll cells	palisade mesophyll cells
BnOLEO11-C07	BnaC07g31360D	CAAT-box	CCAAT	1028	5	-	Arabidopsis thaliana	common cis-acting element in promoter and enhancer regions	promoter and enhancer regions
BnOLEO11-C07	BnaC07g31360D	TCT-motif	TCTTAC	1147	6	-	Arabidopsis thaliana	part of a light responsive element	light response
BnOLEO11-C07	BnaC07g31360D	CAAT-box	CAAAT	1158	5	+	Pisum sativum	common cis-acting element in promoter and enhancer regions	promoter and enhancer regions
BnOLEO11-C07	BnaC07g31360D	TATA-box	TACAAAA	1188	7	+	Oryza sativa	core promoter element around -30 of transcription start	core promoter element transcription start
BnOLEO11-C07	BnaC07g31360D	CAAT-box	CAAAT	1206	5	+	Pisum sativum	common cis-acting element in promoter and enhancer regions	promoter and enhancer regions
BnOLEO11-C07	BnaC07g31360D	TATA-box	TATA	1217	4	-	Arabidopsis thaliana	core promoter element around -30 of transcription start	core promoter element transcription start
BnOLEO11-C07	BnaC07g31360D	CAAT-box	CAAAT	1238	5	-	Pisum sativum	common cis-acting element in promoter and enhancer regions	promoter and enhancer regions
BnOLEO11-C07	BnaC07g31360D	Box 4	ATTAAT	1245	6	-	Petroselinum crispum	part of a conserved DNA module involved in light responsiveness	light response
BnOLEO11-C07	BnaC07g31360D	TATA-box	ATTATA	1249	6	+	Brassica napus	core promoter element around -30 of transcription start	core promoter element transcription start
BnOLEO11-C07	BnaC07g31360D	TATA-box	TATAA	1250	5	-	Arabidopsis thaliana	core promoter element around -30 of transcription start	core promoter element transcription start
BnOLEO11-C07	BnaC07g31360D	TATA-box	TATA	1251	4	-	Arabidopsis thaliana	core promoter element around -30 of transcription start	core promoter element transcription start
BnOLEO11-C07	BnaC07g31360D	TATA-box	ATTATA	1306	6	+	Brassica napus	core promoter element around -30 of transcription start	core promoter element transcription start
BnOLEO11-C07	BnaC07g31360D	TATA-box	TATAA	1307	5	-	Arabidopsis thaliana	core promoter element around -30 of transcription start	core promoter element transcription start
BnOLEO11-C07	BnaC07g31360D	TATA-box	TATA	1308	4	-	Arabidopsis thaliana	core promoter element around -30 of transcription start	core promoter element transcription start
BnOLEO11-C07	BnaC07g31360D	CAAT-box	CAAAT	1357	5	+	Pisum sativum	common cis-acting element in promoter and enhancer regions	promoter and enhancer regions
BnOLEO11-C07	BnaC07g31360D	CAAT-box	CAAAT	1367	5	+	Pisum sativum	common cis-acting element in promoter and enhancer regions	promoter and enhancer regions
BnOLEO11-C07	BnaC07g31360D	CAAT-box	CAAAT	1379	5	-	Pisum sativum	common cis-acting element in promoter and enhancer regions	promoter and enhancer regions
BnOLEO11-C07	BnaC07g31360D		motif_sequence	1384	4	-	organism	short_function	short_function
BnOLEO11-C07	BnaC07g31360D		motif_sequence	1438	4	-	organism	short_function	short_function
BnOLEO11-C07	BnaC07g31360D	CAAT-box	CCAAT	1447	5	+	Arabidopsis thaliana	common cis-acting element in promoter and enhancer regions	promoter and enhancer regions
BnOLEO11-C07	BnaC07g31360D	TATA-box	TATA	1488	4	-	Arabidopsis thaliana	core promoter element around -30 of transcription start	core promoter element transcription start
BnOLEO11-C07	BnaC07g31360D	TATA-box	TATA	1513	4	-	Arabidopsis thaliana	core promoter element around -30 of transcription start	core promoter element transcription start
BnOLEO11-C07	BnaC07g31360D	TATA-box	TATAAAA	1593	7	-	Pisum sativum	core promoter element around -30 of transcription start	core promoter element transcription start
BnOLEO11-C07	BnaC07g31360D	TATA-box	TATAAA	1594	6	-	Helianthus annuus	core promoter element around -30 of transcription start	core promoter element transcription start
BnOLEO11-C07	BnaC07g31360D	TATA-box	TATAA	1595	5	-	Arabidopsis thaliana	core promoter element around -30 of transcription start	core promoter element transcription start
BnOLEO11-C07	BnaC07g31360D	TATA-box	TATA	1596	4	-	Arabidopsis thaliana	core promoter element around -30 of transcription start	core promoter element transcription start
BnOLEO11-C07	BnaC07g31360D	CAAT-box	CCAAT	1616	5	+	Arabidopsis thaliana	common cis-acting element in promoter and enhancer regions	promoter and enhancer regions
BnOLEO11-C07	BnaC07g31360D	CAAT-box	CAAAT	1624	5	-	Pisum sativum	common cis-acting element in promoter and enhancer regions	promoter and enhancer regions
BnOLEO11-C07	BnaC07g31360D	TATA-box	TATAAATA	1642	8	-	Daucus carota	core promoter element around -30 of transcription start	core promoter element transcription start
BnOLEO11-C07	BnaC07g31360D	TATA-box	TATAAAT	1643	7	-	Brassica juncea	core promoter element around -30 of transcription start	core promoter element transcription start
BnOLEO11-C07	BnaC07g31360D	TATA-box	TATAAA	1644	6	-	Helianthus annuus	core promoter element around -30 of transcription start	core promoter element transcription start
BnOLEO11-C07	BnaC07g31360D	TATA-box	TATAA	1645	5	-	Arabidopsis thaliana	core promoter element around -30 of transcription start	core promoter element transcription start
BnOLEO11-C07	BnaC07g31360D	TATA-box	TATA	1646	4	-	Arabidopsis thaliana	core promoter element around -30 of transcription start	core promoter element transcription start
BnOLEO11-C07	BnaC07g31360D	TATA-box	TATAAAT	1660	7	-	Brassica juncea	core promoter element around -30 of transcription start	core promoter element transcription start
BnOLEO11-C07	BnaC07g31360D	TATA-box	TATAAA	1661	6	-	Helianthus annuus	core promoter element around -30 of transcription start	core promoter element transcription start
BnOLEO11-C07	BnaC07g31360D	TATA-box	TATAA	1662	5	-	Arabidopsis thaliana	core promoter element around -30 of transcription start	core promoter element transcription start
BnOLEO11-C07	BnaC07g31360D	TATA-box	TATA	1663	4	-	Arabidopsis thaliana	core promoter element around -30 of transcription start	core promoter element transcription start
BnOLEO11-C07	BnaC07g31360D	Box 4	ATTAAT	1667	6	-	Petroselinum crispum	part of a conserved DNA module involved in light responsiveness	light response
BnOLEO11-C07	BnaC07g31360D	LTR	CCGAAA	1679	6	+	Hordeum vulgare	cis-acting element involved in low-temperature responsiveness	low-temperature responsiveness
BnOLEO11-C07	BnaC07g31360D	TATA-box	TACAAAA	1713	7	-	Oryza sativa	core promoter element around -30 of transcription start	core promoter element transcription start
BnOLEO11-C07	BnaC07g31360D	LAMP-element	CTTTATCA	1731	8	-	Pisum sativum	part of a light responsive element	light response
BnOLEO11-C07	BnaC07g31360D	Box 4	ATTAAT	1766	6	-	Petroselinum crispum	part of a conserved DNA module involved in light responsiveness	light response
BnOLEO11-C07	BnaC07g31360D	Box 4	ATTAAT	1793	6	-	Petroselinum crispum	part of a conserved DNA module involved in light responsiveness	light response
BnOLEO11-C07	BnaC07g31360D		motif_sequence	1824	4	-	organism	short_function	short_function
BnOLEO11-C07	BnaC07g31360D	CGTCA-motif	CGTCA	1841	5	-	Hordeum vulgare	cis-acting regulatory element involved in the MeJA-responsiveness	MeJA-responsiveness
BnOLEO11-C07	BnaC07g31360D	TGACG-motif	TGACG	1841	5	+	Hordeum vulgare	cis-acting regulatory element involved in the MeJA-responsiveness	MeJA-responsiveness
BnOLEO11-C07	BnaC07g31360D	G-box	CACGTC	1842	6	-	Zea mays	cis-acting regulatory element involved in light responsiveness	light response
BnOLEO11-C07	BnaC07g31360D	ABRE	ACGTG	1843	5	+	Arabidopsis thaliana	cis-acting element involved in the abscisic acid responsiveness	abscisic acid responsiveness
BnOLEO11-C07	BnaC07g31360D	CAAT-box	CAAAT	1868	5	+	Pisum sativum	common cis-acting element in promoter and enhancer regions	promoter and enhancer regions
BnOLEO11-C07	BnaC07g31360D	RY-element	CATGCATG	1883	8	-	Helianthus annuus	cis-acting regulatory element involved in seed-specific regulation	seed-specific regulation
BnOLEO11-C07	BnaC07g31360D	Box II	ACACGTAGA	1918	9	+	Arabidopsis thaliana	part of a light responsive element	light response
BnOLEO11-C07	BnaC07g31360D	G-box	TACGTG	1919	6	-	Arabidopsis thaliana	cis-acting regulatory element involved in light responsiveness	light response
BnOLEO11-C07	BnaC07g31360D	ABRE	ACGTG	1919	5	-	Arabidopsis thaliana	cis-acting element involved in the abscisic acid responsiveness	abscisic acid responsiveness
BnOLEO11-C07	BnaC07g31360D	I-box	GTATAAGGCC	1925	9	-	Larix laricina	part of a light responsive element	light response
BnOLEO11-C07	BnaC07g31360D	GATA-motif	AAGGATAAGG	1927	9	-	Solanum tuberosum	part of a light responsive element	light response
BnOLEO11-C07	BnaC07g31360D	TATA-box	TATAA	1929	5	-	Arabidopsis thaliana	core promoter element around -30 of transcription start	core promoter element transcription start
BnOLEO11-C07	BnaC07g31360D	TATA-box	TATA	1930	4	-	Arabidopsis thaliana	core promoter element around -30 of transcription start	core promoter element transcription start
BnOLEO11-C07	BnaC07g31360D	TATA-box	ccTATAAAaa	1979	9	+	Arabidopsis thaliana	core promoter element around -30 of transcription start	core promoter element transcription start
BnOLEO11-C07	BnaC07g31360D	TATA-box	TATA	1981	4	-	Arabidopsis thaliana	core promoter element around -30 of transcription start	core promoter element transcription start
BnOLEO11-A03	BnaA03g40390D	ARE	AAACCA	2	6	-	Zea mays	cis-acting regulatory element essential for the anaerobic induction	anaerobic induction
BnOLEO11-A03	BnaA03g40390D	CAAT-box	CAAAT	13	5	-	Pisum sativum	common cis-acting element in promoter and enhancer regions	promoter and enhancer regions
BnOLEO11-A03	BnaA03g40390D	LTR	CCGAAA	29	6	-	Hordeum vulgare	cis-acting element involved in low-temperature responsiveness	low-temperature responsiveness
BnOLEO11-A03	BnaA03g40390D		motif_sequence	34	4	-	organism	short_function	short_function
BnOLEO11-A03	BnaA03g40390D	MBS	CAACTG	51	6	-	Arabidopsis thaliana	MYB binding site involved in drought-inducibility	MYB binding site
BnOLEO11-A03	BnaA03g40390D		motif_sequence	60	4	-	organism	short_function	short_function
BnOLEO11-A03	BnaA03g40390D		motif_sequence	99	4	-	organism	short_function	short_function
BnOLEO11-A03	BnaA03g40390D	TATA-box	ATATAA	109	6	+	Brassica oleracea	core promoter element around -30 of transcription start	core promoter element transcription start
BnOLEO11-A03	BnaA03g40390D	TATA-box	TATA	110	4	+	Arabidopsis thaliana	core promoter element around -30 of transcription start	core promoter element transcription start
BnOLEO11-A03	BnaA03g40390D	TATA-box	ATATAA	129	6	+	Brassica oleracea	core promoter element around -30 of transcription start	core promoter element transcription start
BnOLEO11-A03	BnaA03g40390D	TATA-box	TATA	130	4	+	Arabidopsis thaliana	core promoter element around -30 of transcription start	core promoter element transcription start
BnOLEO11-A03	BnaA03g40390D	TATA-box	ATATAT	219	6	+	Brassica napus	core promoter element around -30 of transcription start	core promoter element transcription start
BnOLEO11-A03	BnaA03g40390D	TATA-box	TATA	220	4	+	Arabidopsis thaliana	core promoter element around -30 of transcription start	core promoter element transcription start
BnOLEO11-A03	BnaA03g40390D	TATA-box	TATAA	291	5	-	Arabidopsis thaliana	core promoter element around -30 of transcription start	core promoter element transcription start
BnOLEO11-A03	BnaA03g40390D	TATA-box	TATA	292	4	+	Arabidopsis thaliana	core promoter element around -30 of transcription start	core promoter element transcription start
BnOLEO11-A03	BnaA03g40390D	TATA-box	TATATTTATATTT	298	12	-	Avena sativa	core promoter element around -30 of transcription start	core promoter element transcription start
BnOLEO11-A03	BnaA03g40390D	TATA-box	ATATAT	306	6	+	Brassica napus	core promoter element around -30 of transcription start	core promoter element transcription start
BnOLEO11-A03	BnaA03g40390D	TATA-box	TATA	307	4	+	Arabidopsis thaliana	core promoter element around -30 of transcription start	core promoter element transcription start
BnOLEO11-A03	BnaA03g40390D	TATA-box	ATATAT	319	6	+	Brassica napus	core promoter element around -30 of transcription start	core promoter element transcription start
BnOLEO11-A03	BnaA03g40390D	TATA-box	TATATA	320	6	+	Arabidopsis thaliana	core promoter element around -30 of transcription start	core promoter element transcription start
BnOLEO11-A03	BnaA03g40390D	TATA-box	ATATAT	321	6	+	Brassica napus	core promoter element around -30 of transcription start	core promoter element transcription start
BnOLEO11-A03	BnaA03g40390D	TATA-box	TATA	322	4	+	Arabidopsis thaliana	core promoter element around -30 of transcription start	core promoter element transcription start
BnOLEO11-A03	BnaA03g40390D	TATA-box	TATA	367	4	+	Arabidopsis thaliana	core promoter element around -30 of transcription start	core promoter element transcription start
BnOLEO11-A03	BnaA03g40390D	TATA-box	ATTATA	373	6	+	Brassica napus	core promoter element around -30 of transcription start	core promoter element transcription start
BnOLEO11-A03	BnaA03g40390D	TATA-box	TATAA	374	5	-	Arabidopsis thaliana	core promoter element around -30 of transcription start	core promoter element transcription start
BnOLEO11-A03	BnaA03g40390D	TATA-box	TATA	375	4	+	Arabidopsis thaliana	core promoter element around -30 of transcription start	core promoter element transcription start
BnOLEO11-A03	BnaA03g40390D	TGA-element	AACGAC	391	6	-	Brassica oleracea	auxin-responsive element	auxin responsive
BnOLEO11-A03	BnaA03g40390D	CAAT-box	CAAAT	479	5	-	Pisum sativum	common cis-acting element in promoter and enhancer regions	promoter and enhancer regions
BnOLEO11-A03	BnaA03g40390D	circadian	CAAAGATATC	491	9	+	Lycopersicon esculentum	cis-acting regulatory element involved in circadian control	circadian control
BnOLEO11-A03	BnaA03g40390D	TATA-box	TATACA	528	6	-	Helianthus annuus	core promoter element around -30 of transcription start	core promoter element transcription start
BnOLEO11-A03	BnaA03g40390D	TATA-box	TATA	530	4	+	Arabidopsis thaliana	core promoter element around -30 of transcription start	core promoter element transcription start
BnOLEO11-A03	BnaA03g40390D	TATA-box	TATAAAT	534	7	-	Brassica juncea	core promoter element around -30 of transcription start	core promoter element transcription start
BnOLEO11-A03	BnaA03g40390D	TATA-box	TATAAA	535	6	-	Helianthus annuus	core promoter element around -30 of transcription start	core promoter element transcription start
BnOLEO11-A03	BnaA03g40390D	TATA-box	TATAA	536	5	-	Arabidopsis thaliana	core promoter element around -30 of transcription start	core promoter element transcription start
BnOLEO11-A03	BnaA03g40390D	TATA-box	TATA	537	4	+	Arabidopsis thaliana	core promoter element around -30 of transcription start	core promoter element transcription start
BnOLEO11-A03	BnaA03g40390D	TATA-box	ATATAA	548	6	+	Brassica oleracea	core promoter element around -30 of transcription start	core promoter element transcription start
BnOLEO11-A03	BnaA03g40390D	TATA-box	TATA	549	4	+	Arabidopsis thaliana	core promoter element around -30 of transcription start	core promoter element transcription start
BnOLEO11-A03	BnaA03g40390D	TATA-box	ATATAA	562	6	+	Brassica oleracea	core promoter element around -30 of transcription start	core promoter element transcription start
BnOLEO11-A03	BnaA03g40390D	TATA-box	TATA	563	4	+	Arabidopsis thaliana	core promoter element around -30 of transcription start	core promoter element transcription start
BnOLEO11-A03	BnaA03g40390D	Box 4	ATTAAT	576	6	+	Petroselinum crispum	part of a conserved DNA module involved in light responsiveness	light response
BnOLEO11-A03	BnaA03g40390D		motif_sequence	617	4	-	organism	short_function	short_function
BnOLEO11-A03	BnaA03g40390D	TATA-box	TACAAAA	643	7	-	Oryza sativa	core promoter element around -30 of transcription start	core promoter element transcription start
BnOLEO11-A03	BnaA03g40390D	CAAT-box	CAAAT	696	5	-	Pisum sativum	common cis-acting element in promoter and enhancer regions	promoter and enhancer regions
BnOLEO11-A03	BnaA03g40390D	CAAT-box	CCAAT	705	5	-	Arabidopsis thaliana	common cis-acting element in promoter and enhancer regions	promoter and enhancer regions
BnOLEO11-A03	BnaA03g40390D	TGACG-motif	TGACG	758	5	-	Hordeum vulgare	cis-acting regulatory element involved in the MeJA-responsiveness	MeJA-responsiveness
BnOLEO11-A03	BnaA03g40390D	CGTCA-motif	CGTCA	758	5	+	Hordeum vulgare	cis-acting regulatory element involved in the MeJA-responsiveness	MeJA-responsiveness
BnOLEO11-A03	BnaA03g40390D		motif_sequence	776	4	-	organism	short_function	short_function
BnOLEO11-A03	BnaA03g40390D		motif_sequence	821	4	-	organism	short_function	short_function
BnOLEO11-A03	BnaA03g40390D		motif_sequence	829	4	-	organism	short_function	short_function
BnOLEO11-A03	BnaA03g40390D	TATA-box	TATAAA	854	6	-	Helianthus annuus	core promoter element around -30 of transcription start	core promoter element transcription start
BnOLEO11-A03	BnaA03g40390D	TATA-box	TATAA	855	5	-	Arabidopsis thaliana	core promoter element around -30 of transcription start	core promoter element transcription start
BnOLEO11-A03	BnaA03g40390D	TATA-box	TATA	856	4	+	Arabidopsis thaliana	core promoter element around -30 of transcription start	core promoter element transcription start
BnOLEO11-A03	BnaA03g40390D	TATA-box	ATTATA	863	6	+	Brassica napus	core promoter element around -30 of transcription start	core promoter element transcription start
BnOLEO11-A03	BnaA03g40390D	TATA-box	TATAA	864	5	-	Arabidopsis thaliana	core promoter element around -30 of transcription start	core promoter element transcription start
BnOLEO11-A03	BnaA03g40390D	TATA-box	TATATTTATATTT	865	12	+	Avena sativa	core promoter element around -30 of transcription start	core promoter element transcription start
BnOLEO11-A03	BnaA03g40390D	TATA-box	TATTTAAA	867	8	+	Arabidopsis thaliana	core promoter element around -30 of transcription start	core promoter element transcription start
BnOLEO11-A03	BnaA03g40390D	CAAT-box	CAAAT	879	5	-	Pisum sativum	common cis-acting element in promoter and enhancer regions	promoter and enhancer regions
BnOLEO11-A03	BnaA03g40390D	ARE	AAACCA	882	6	-	Zea mays	cis-acting regulatory element essential for the anaerobic induction	anaerobic induction
BnOLEO11-A03	BnaA03g40390D	CAAT-box	CCAAT	931	5	+	Arabidopsis thaliana	common cis-acting element in promoter and enhancer regions	promoter and enhancer regions
BnOLEO11-A03	BnaA03g40390D	TATA-box	ATTATA	934	6	+	Brassica napus	core promoter element around -30 of transcription start	core promoter element transcription start
BnOLEO11-A03	BnaA03g40390D	TATA-box	TATAA	935	5	-	Arabidopsis thaliana	core promoter element around -30 of transcription start	core promoter element transcription start
BnOLEO11-A03	BnaA03g40390D	TATA-box	TATA	936	4	+	Arabidopsis thaliana	core promoter element around -30 of transcription start	core promoter element transcription start
BnOLEO11-A03	BnaA03g40390D	CAAT-box	CAAAT	982	5	+	Pisum sativum	common cis-acting element in promoter and enhancer regions	promoter and enhancer regions
BnOLEO11-A03	BnaA03g40390D	TATA-box	TATACA	1022	6	-	Helianthus annuus	core promoter element around -30 of transcription start	core promoter element transcription start
BnOLEO11-A03	BnaA03g40390D	TATA-box	TATA	1024	4	-	Arabidopsis thaliana	core promoter element around -30 of transcription start	core promoter element transcription start
BnOLEO11-A03	BnaA03g40390D		motif_sequence	1040	4	+	organism	short_function	short_function
BnOLEO11-A03	BnaA03g40390D	TATA-box	TATA	1070	4	-	Arabidopsis thaliana	core promoter element around -30 of transcription start	core promoter element transcription start
BnOLEO11-A03	BnaA03g40390D	TATA-box	TATA	1112	4	-	Arabidopsis thaliana	core promoter element around -30 of transcription start	core promoter element transcription start
BnOLEO11-A03	BnaA03g40390D	TATA-box	TATATAA	1130	7	-	Arabidopsis thaliana	core promoter element around -30 of transcription start	core promoter element transcription start
BnOLEO11-A03	BnaA03g40390D	TATA-box	TATATA	1131	6	-	Arabidopsis thaliana	core promoter element around -30 of transcription start	core promoter element transcription start
BnOLEO11-A03	BnaA03g40390D	TATA-box	ATATAT	1132	6	-	Brassica napus	core promoter element around -30 of transcription start	core promoter element transcription start
BnOLEO11-A03	BnaA03g40390D	TATA-box	TATA	1133	4	-	Arabidopsis thaliana	core promoter element around -30 of transcription start	core promoter element transcription start
BnOLEO11-A03	BnaA03g40390D	Box 4	ATTAAT	1136	6	-	Petroselinum crispum	part of a conserved DNA module involved in light responsiveness	light response
BnOLEO11-A03	BnaA03g40390D		motif_sequence	1143	4	-	organism	short_function	short_function
BnOLEO11-A03	BnaA03g40390D	TATA-box	TACAAAA	1152	7	+	Oryza sativa	core promoter element around -30 of transcription start	core promoter element transcription start
BnOLEO11-A03	BnaA03g40390D	TATA-box	TACAAAA	1162	7	-	Oryza sativa	core promoter element around -30 of transcription start	core promoter element transcription start
BnOLEO11-A03	BnaA03g40390D	CAAT-box	CCAAT	1170	5	+	Arabidopsis thaliana	common cis-acting element in promoter and enhancer regions	promoter and enhancer regions
BnOLEO11-A03	BnaA03g40390D	TATA-box	TATAAGAA	1192	8	-	Zea mays	core promoter element around -30 of transcription start	core promoter element transcription start
BnOLEO11-A03	BnaA03g40390D	TATA-box	TATAA	1195	5	-	Arabidopsis thaliana	core promoter element around -30 of transcription start	core promoter element transcription start
BnOLEO11-A03	BnaA03g40390D	TATA-box	TATA	1196	4	-	Arabidopsis thaliana	core promoter element around -30 of transcription start	core promoter element transcription start
BnOLEO11-A03	BnaA03g40390D	TATA-box	ATATAT	1227	6	-	Brassica napus	core promoter element around -30 of transcription start	core promoter element transcription start
BnOLEO11-A03	BnaA03g40390D	TATA-box	TATA	1228	4	-	Arabidopsis thaliana	core promoter element around -30 of transcription start	core promoter element transcription start
BnOLEO11-A03	BnaA03g40390D	TATA-box	ATTATA	1231	6	+	Brassica napus	core promoter element around -30 of transcription start	core promoter element transcription start
BnOLEO11-A03	BnaA03g40390D	TATA-box	TATAA	1232	5	-	Arabidopsis thaliana	core promoter element around -30 of transcription start	core promoter element transcription start
BnOLEO11-A03	BnaA03g40390D	TATA-box	TATA	1233	4	-	Arabidopsis thaliana	core promoter element around -30 of transcription start	core promoter element transcription start
BnOLEO11-A03	BnaA03g40390D	TATA-box	ATATAA	1253	6	+	Brassica oleracea	core promoter element around -30 of transcription start	core promoter element transcription start
BnOLEO11-A03	BnaA03g40390D	TATA-box	TATA	1254	4	-	Arabidopsis thaliana	core promoter element around -30 of transcription start	core promoter element transcription start
BnOLEO11-A03	BnaA03g40390D	TATA-box	TATA	1272	4	-	Arabidopsis thaliana	core promoter element around -30 of transcription start	core promoter element transcription start
BnOLEO11-A03	BnaA03g40390D	TATA-box	TACAAAA	1274	7	+	Oryza sativa	core promoter element around -30 of transcription start	core promoter element transcription start
BnOLEO11-A03	BnaA03g40390D		motif_sequence	1372	4	+	organism	short_function	short_function
BnOLEO11-A03	BnaA03g40390D	TATA-box	TACAAAA	1385	7	-	Oryza sativa	core promoter element around -30 of transcription start	core promoter element transcription start
BnOLEO11-A03	BnaA03g40390D	ABRE	ACGTG	1397	5	-	Arabidopsis thaliana	cis-acting element involved in the abscisic acid responsiveness	abscisic acid responsiveness
BnOLEO11-A03	BnaA03g40390D	G-box	CACGTT	1397	6	+	Pisum sativum	cis-acting regulatory element involved in light responsiveness	light response
BnOLEO11-A03	BnaA03g40390D	TATA-box	TATAAAA	1412	7	-	Pisum sativum	core promoter element around -30 of transcription start	core promoter element transcription start
BnOLEO11-A03	BnaA03g40390D	TATA-box	TATAAA	1413	6	-	Helianthus annuus	core promoter element around -30 of transcription start	core promoter element transcription start
BnOLEO11-A03	BnaA03g40390D	TATA-box	TATAA	1414	5	-	Arabidopsis thaliana	core promoter element around -30 of transcription start	core promoter element transcription start
BnOLEO11-A03	BnaA03g40390D	TATA-box	TATA	1415	4	-	Arabidopsis thaliana	core promoter element around -30 of transcription start	core promoter element transcription start
BnOLEO11-A03	BnaA03g40390D	TATA-box	ATATAT	1469	6	-	Brassica napus	core promoter element around -30 of transcription start	core promoter element transcription start
BnOLEO11-A03	BnaA03g40390D	TATA-box	TATA	1470	4	-	Arabidopsis thaliana	core promoter element around -30 of transcription start	core promoter element transcription start
BnOLEO11-A03	BnaA03g40390D	TATA-box	ATTATA	1539	6	+	Brassica napus	core promoter element around -30 of transcription start	core promoter element transcription start
BnOLEO11-A03	BnaA03g40390D	TATA-box	TATATAA	1540	7	-	Arabidopsis thaliana	core promoter element around -30 of transcription start	core promoter element transcription start
BnOLEO11-A03	BnaA03g40390D	TATA-box	TATATA	1541	6	-	Arabidopsis thaliana	core promoter element around -30 of transcription start	core promoter element transcription start
BnOLEO11-A03	BnaA03g40390D	TATA-box	TATA	1543	4	-	Arabidopsis thaliana	core promoter element around -30 of transcription start	core promoter element transcription start
BnOLEO11-A03	BnaA03g40390D	TATA-box	TATA	1578	4	-	Arabidopsis thaliana	core promoter element around -30 of transcription start	core promoter element transcription start
BnOLEO11-A03	BnaA03g40390D	TATA-box	TATATA	1642	6	-	Arabidopsis thaliana	core promoter element around -30 of transcription start	core promoter element transcription start
BnOLEO11-A03	BnaA03g40390D	TATA-box	ATATAT	1643	6	-	Brassica napus	core promoter element around -30 of transcription start	core promoter element transcription start
BnOLEO11-A03	BnaA03g40390D	TATA-box	TATATA	1644	6	-	Arabidopsis thaliana	core promoter element around -30 of transcription start	core promoter element transcription start
BnOLEO11-A03	BnaA03g40390D	TATA-box	ATATAA	1645	6	+	Brassica oleracea	core promoter element around -30 of transcription start	core promoter element transcription start
BnOLEO11-A03	BnaA03g40390D	TATA-box	TATA	1646	4	-	Arabidopsis thaliana	core promoter element around -30 of transcription start	core promoter element transcription start
BnOLEO11-A03	BnaA03g40390D	ABRE	ACGTG	1660	5	-	Arabidopsis thaliana	cis-acting element involved in the abscisic acid responsiveness	abscisic acid responsiveness
BnOLEO11-A03	BnaA03g40390D	G-box	CACGTC	1660	6	+	Zea mays	cis-acting regulatory element involved in light responsiveness	light response
BnOLEO11-A03	BnaA03g40390D	TATA-box	TATA	1736	4	-	Arabidopsis thaliana	core promoter element around -30 of transcription start	core promoter element transcription start
BnOLEO11-A03	BnaA03g40390D	TATA-box	TATA	1762	4	-	Arabidopsis thaliana	core promoter element around -30 of transcription start	core promoter element transcription start
BnOLEO11-A03	BnaA03g40390D	Box 4	ATTAAT	1793	6	-	Petroselinum crispum	part of a conserved DNA module involved in light responsiveness	light response
BnOLEO11-A03	BnaA03g40390D	CGTCA-motif	CGTCA	1840	5	-	Hordeum vulgare	cis-acting regulatory element involved in the MeJA-responsiveness	MeJA-responsiveness
BnOLEO11-A03	BnaA03g40390D	TGACG-motif	TGACG	1840	5	+	Hordeum vulgare	cis-acting regulatory element involved in the MeJA-responsiveness	MeJA-responsiveness
BnOLEO11-A03	BnaA03g40390D	G-box	CACGTC	1841	6	-	Zea mays	cis-acting regulatory element involved in light responsiveness	light response
BnOLEO11-A03	BnaA03g40390D	ABRE	ACGTG	1842	5	+	Arabidopsis thaliana	cis-acting element involved in the abscisic acid responsiveness	abscisic acid responsiveness
BnOLEO11-A03	BnaA03g40390D		motif_sequence	1849	4	-	organism	short_function	short_function
BnOLEO11-A03	BnaA03g40390D	CAAT-box	CAAAT	1867	5	+	Pisum sativum	common cis-acting element in promoter and enhancer regions	promoter and enhancer regions
BnOLEO11-A03	BnaA03g40390D	RY-element	CATGCATG	1882	8	-	Helianthus annuus	cis-acting regulatory element involved in seed-specific regulation	seed-specific regulation
BnOLEO11-A03	BnaA03g40390D	ABRE	CGTACGTGCA	1916	9	-	Hordeum vulgare	cis-acting element involved in the abscisic acid responsiveness	abscisic acid responsiveness
BnOLEO11-A03	BnaA03g40390D	G-box	TACGTG	1918	6	-	Arabidopsis thaliana	cis-acting regulatory element involved in light responsiveness	light response
BnOLEO11-A03	BnaA03g40390D	ABRE	ACGTG	1918	5	-	Arabidopsis thaliana	cis-acting element involved in the abscisic acid responsiveness	abscisic acid responsiveness
BnOLEO11-A03	BnaA03g40390D	I-box	GTATAAGGCC	1928	9	-	Larix laricina	part of a light responsive element	light response
BnOLEO11-A03	BnaA03g40390D	GATA-motif	AAGGATAAGG	1930	9	-	Solanum tuberosum	part of a light responsive element	light response
BnOLEO11-A03	BnaA03g40390D	TATA-box	TATAA	1932	5	-	Arabidopsis thaliana	core promoter element around -30 of transcription start	core promoter element transcription start
BnOLEO11-A03	BnaA03g40390D	TATA-box	TATA	1933	4	-	Arabidopsis thaliana	core promoter element around -30 of transcription start	core promoter element transcription start
BnOLEO11-A03	BnaA03g40390D	TATA-box	ccTATAAAaa	1979	9	+	Arabidopsis thaliana	core promoter element around -30 of transcription start	core promoter element transcription start
BnOLEO11-A03	BnaA03g40390D	TATA-box	TATA	1981	4	-	Arabidopsis thaliana	core promoter element around -30 of transcription start	core promoter element transcription start
[truncated: 3,449 more rows]
