# Supplementary material for: Transcriptome and Regional Association Analyses Reveal the Effects of Oleosin Genes on the Accumulation of Oil Content in Brassica napus
Source: Plants (Basel). 2022 Nov 16;11(22):3140. doi: 10.3390/plants11223140 (PMC9698637; doi:10.3390/plants11223140)
Supplement: Supplementary file 1 [file plants-11-03140-s001.zip › Table S3.xlsx]

## Sheet: Sheet1
Table S3. Transcription factor binding sites in the promoter region of oleosin genes in B. napus.
Gene name	Gene ID	TFs pattern name	TFs family	start	stop	strand	p-value
BnGRP17-Ann	BnaAnng13740D	BnaA07g06740D	MYB	1958	1978	+	5.03e-07
BnGRP17-Ann	BnaAnng13740D	BnaA08g02650D	B3	1080	1094	+	1.94e-07
BnGRP17-Ann	BnaAnng13740D	BnaC01g42310D	Dof	50	70	+	3.43e-07
BnGRP17-Ann	BnaAnng13740D	BnaA08g02650D	B3	1079	1093	+	1.3e-08
BnGRP14-C02	BnaC02g01570D	BnaAnng27960D	MYB	975	989	+	7.66e-07
BnGRP14-C02	BnaC02g01570D	BnaAnng27960D	MYB	1440	1454	+	6.36e-08
BnGRP14-C02	BnaC02g01570D	BnaC07g48490D	ARF	464	473	+	9.47e-07
BnGRP14-C02	BnaC02g01570D	BnaC07g00780D	bHLH	1669	1682	-	6.11e-07
BnGRP17-A03	BnaA03g02100D	BnaC06g42740D	BBR-BPC	468	488	+	2.38e-10
BnGRP17-A03	BnaA03g02100D	BnaC07g47530D	BBR-BPC	466	495	-	8.46e-13
BnGRP17-A03	BnaA03g02100D	BnaC07g47530D	BBR-BPC	468	497	-	1.8e-12
BnGRP17-A03	BnaA03g02100D	BnaA03g56880D	MIKC_MADS	471	491	+	2.94e-08
BnGRP17-A03	BnaA03g02100D	BnaC07g47530D	BBR-BPC	470	499	-	3.6e-17
BnGRP17-A03	BnaA03g02100D	BnaC06g42740D	BBR-BPC	470	490	+	2.21e-09
BnGRP17-A03	BnaA03g02100D	BnaC07g20900D	GRAS	471	490	-	6.25e-07
BnGRP17-A03	BnaA03g02100D	BnaC07g20900D	GRAS	473	492	-	1.74e-07
BnGRP17-A03	BnaA03g02100D	BnaA03g56880D	MIKC_MADS	473	493	+	1.93e-09
BnGRP17-A03	BnaA03g02100D	BnaC07g47530D	BBR-BPC	474	503	-	2.29e-19
BnGRP17-A03	BnaA03g02100D	BnaC06g42740D	BBR-BPC	474	494	+	6.62e-14
BnGRP17-A03	BnaA03g02100D	BnaA03g56880D	MIKC_MADS	475	495	+	1.93e-09
BnGRP17-A03	BnaA03g02100D	BnaA02g03590D	AP2/ERF	475	494	-	8.65e-08
BnGRP17-A03	BnaA03g02100D	BnaC07g20900D	GRAS	475	494	-	1.74e-07
BnGRP17-A03	BnaA03g02100D	BnaC07g47530D	BBR-BPC	476	505	-	2.29e-19
BnGRP17-A03	BnaA03g02100D	BnaC06g42740D	BBR-BPC	476	496	+	6.62e-14
BnGRP17-A03	BnaA03g02100D	BnaA02g03590D	AP2/ERF	477	496	-	8.65e-08
BnGRP17-A03	BnaA03g02100D	BnaC07g47530D	BBR-BPC	472	501	-	2.29e-19
BnGRP17-A03	BnaA03g02100D	BnaC06g42740D	BBR-BPC	472	492	+	6.62e-14
BnGRP17-A03	BnaA03g02100D	BnaA02g03590D	AP2/ERF	473	492	-	8.65e-08
BnGRP17-A03	BnaA03g02100D	BnaC06g42740D	BBR-BPC	478	498	+	6.62e-14
BnGRP17-A03	BnaA03g02100D	BnaA02g03590D	AP2/ERF	479	498	-	8.65e-08
BnGRP17-A03	BnaA03g02100D	BnaA03g56880D	MIKC_MADS	479	499	+	1.93e-09
BnGRP17-A03	BnaA03g02100D	BnaC07g20900D	GRAS	479	498	-	1.74e-07
BnGRP17-A03	BnaA03g02100D	BnaC07g47530D	BBR-BPC	480	509	-	2.29e-19
BnGRP17-A03	BnaA03g02100D	BnaC06g42740D	BBR-BPC	480	500	+	6.62e-14
BnGRP17-A03	BnaA03g02100D	BnaA03g56880D	MIKC_MADS	481	501	+	1.93e-09
BnGRP17-A03	BnaA03g02100D	BnaA02g03590D	AP2/ERF	481	500	-	8.65e-08
BnGRP17-A03	BnaA03g02100D	BnaC07g20900D	GRAS	481	500	-	1.74e-07
BnGRP17-A03	BnaA03g02100D	BnaC07g47530D	BBR-BPC	482	511	-	2.29e-19
BnGRP17-A03	BnaA03g02100D	BnaA03g56880D	MIKC_MADS	477	497	+	1.93e-09
BnGRP17-A03	BnaA03g02100D	BnaC07g20900D	GRAS	477	496	-	1.74e-07
BnGRP17-A03	BnaA03g02100D	BnaC07g47530D	BBR-BPC	478	507	-	2.29e-19
BnGRP17-A03	BnaA03g02100D	BnaC07g20900D	GRAS	483	502	-	1.74e-07
BnGRP17-A03	BnaA03g02100D	BnaC07g47530D	BBR-BPC	484	513	-	2.29e-19
BnGRP17-A03	BnaA03g02100D	BnaC06g42740D	BBR-BPC	484	504	+	6.62e-14
BnGRP17-A03	BnaA03g02100D	BnaA02g03590D	AP2/ERF	485	504	-	8.65e-08
BnGRP17-A03	BnaA03g02100D	BnaA03g56880D	MIKC_MADS	485	505	+	1.93e-09
BnGRP17-A03	BnaA03g02100D	BnaC07g20900D	GRAS	485	504	-	1.74e-07
BnGRP17-A03	BnaA03g02100D	BnaC07g47530D	BBR-BPC	486	515	-	2.29e-19
BnGRP17-A03	BnaA03g02100D	BnaC06g42740D	BBR-BPC	486	506	+	6.62e-14
BnGRP17-A03	BnaA03g02100D	BnaA02g03590D	AP2/ERF	487	506	-	8.65e-08
BnGRP17-A03	BnaA03g02100D	BnaA03g56880D	MIKC_MADS	487	507	+	1.93e-09
BnGRP17-A03	BnaA03g02100D	BnaC07g20900D	GRAS	487	506	-	1.74e-07
BnGRP17-A03	BnaA03g02100D	BnaC07g47530D	BBR-BPC	488	517	-	2.29e-19
BnGRP17-A03	BnaA03g02100D	BnaC06g42740D	BBR-BPC	488	508	+	6.62e-14
BnGRP17-A03	BnaA03g02100D	BnaA02g03590D	AP2/ERF	489	508	-	8.65e-08
BnGRP17-A03	BnaA03g02100D	BnaA03g56880D	MIKC_MADS	489	509	+	1.93e-09
BnGRP17-A03	BnaA03g02100D	BnaC07g20900D	GRAS	489	508	-	1.74e-07
BnGRP17-A03	BnaA03g02100D	BnaC07g47530D	BBR-BPC	490	519	-	2.29e-19
BnGRP17-A03	BnaA03g02100D	BnaC06g42740D	BBR-BPC	490	510	+	6.62e-14
BnGRP17-A03	BnaA03g02100D	BnaA02g03590D	AP2/ERF	491	510	-	8.65e-08
BnGRP17-A03	BnaA03g02100D	BnaA03g56880D	MIKC_MADS	491	511	+	1.93e-09
BnGRP17-A03	BnaA03g02100D	BnaC07g20900D	GRAS	491	510	-	1.74e-07
BnGRP17-A03	BnaA03g02100D	BnaC07g47530D	BBR-BPC	492	521	-	2.29e-19
BnGRP17-A03	BnaA03g02100D	BnaC06g42740D	BBR-BPC	492	512	+	6.62e-14
BnGRP17-A03	BnaA03g02100D	BnaA03g56880D	MIKC_MADS	493	513	+	1.93e-09
BnGRP17-A03	BnaA03g02100D	BnaA02g03590D	AP2/ERF	493	512	-	8.65e-08
BnGRP17-A03	BnaA03g02100D	BnaC07g20900D	GRAS	493	512	-	1.74e-07
BnGRP17-A03	BnaA03g02100D	BnaC07g47530D	BBR-BPC	494	523	-	2.29e-19
BnGRP17-A03	BnaA03g02100D	BnaC06g42740D	BBR-BPC	494	514	+	6.62e-14
BnGRP17-A03	BnaA03g02100D	BnaC07g20900D	GRAS	495	514	-	1.74e-07
BnGRP17-A03	BnaA03g02100D	BnaA03g56880D	MIKC_MADS	495	515	+	1.93e-09
BnGRP17-A03	BnaA03g02100D	BnaA02g03590D	AP2/ERF	495	514	-	8.65e-08
BnGRP17-A03	BnaA03g02100D	BnaC07g47530D	BBR-BPC	496	525	-	2.29e-19
BnGRP17-A03	BnaA03g02100D	BnaC06g42740D	BBR-BPC	496	516	+	6.62e-14
BnGRP17-A03	BnaA03g02100D	BnaA03g56880D	MIKC_MADS	497	517	+	1.93e-09
BnGRP17-A03	BnaA03g02100D	BnaC07g20900D	GRAS	497	516	-	1.74e-07
BnGRP17-A03	BnaA03g02100D	BnaA02g03590D	AP2/ERF	497	516	-	8.65e-08
BnGRP17-A03	BnaA03g02100D	BnaC07g47530D	BBR-BPC	498	527	-	2.29e-19
BnGRP17-A03	BnaA03g02100D	BnaC06g42740D	BBR-BPC	482	502	+	6.62e-14
BnGRP17-A03	BnaA03g02100D	BnaA02g03590D	AP2/ERF	483	502	-	8.65e-08
BnGRP17-A03	BnaA03g02100D	BnaA03g56880D	MIKC_MADS	483	503	+	1.93e-09
BnGRP17-A03	BnaA03g02100D	BnaA02g03590D	AP2/ERF	499	518	-	8.65e-08
BnGRP17-A03	BnaA03g02100D	BnaC07g47530D	BBR-BPC	500	529	-	2.29e-19
BnGRP17-A03	BnaA03g02100D	BnaC06g42740D	BBR-BPC	500	520	+	6.62e-14
BnGRP17-A03	BnaA03g02100D	BnaC07g20900D	GRAS	501	520	-	1.74e-07
BnGRP17-A03	BnaA03g02100D	BnaA03g56880D	MIKC_MADS	501	521	+	1.93e-09
BnGRP17-A03	BnaA03g02100D	BnaA02g03590D	AP2/ERF	501	520	-	8.65e-08
BnGRP17-A03	BnaA03g02100D	BnaC07g47530D	BBR-BPC	502	531	-	2.29e-19
BnGRP17-A03	BnaA03g02100D	BnaC06g42740D	BBR-BPC	502	522	+	6.62e-14
BnGRP17-A03	BnaA03g02100D	BnaA03g56880D	MIKC_MADS	503	523	+	1.93e-09
BnGRP17-A03	BnaA03g02100D	BnaC07g20900D	GRAS	503	522	-	1.74e-07
BnGRP17-A03	BnaA03g02100D	BnaA02g03590D	AP2/ERF	503	522	-	8.65e-08
BnGRP17-A03	BnaA03g02100D	BnaC07g47530D	BBR-BPC	504	533	-	2.28e-14
BnGRP17-A03	BnaA03g02100D	BnaC06g42740D	BBR-BPC	504	524	+	6.62e-14
BnGRP17-A03	BnaA03g02100D	BnaA03g56880D	MIKC_MADS	505	525	+	1.93e-09
BnGRP17-A03	BnaA03g02100D	BnaC07g20900D	GRAS	505	524	-	1.74e-07
BnGRP17-A03	BnaA03g02100D	BnaA02g03590D	AP2/ERF	505	524	-	8.65e-08
BnGRP17-A03	BnaA03g02100D	BnaC06g42740D	BBR-BPC	506	526	+	6.62e-14
BnGRP17-A03	BnaA03g02100D	BnaC07g47530D	BBR-BPC	506	535	-	6.84e-12
BnGRP17-A03	BnaA03g02100D	BnaC07g20900D	GRAS	507	526	-	1.74e-07
BnGRP17-A03	BnaA03g02100D	BnaA03g56880D	MIKC_MADS	507	527	+	1.93e-09
BnGRP17-A03	BnaA03g02100D	BnaA02g03590D	AP2/ERF	507	526	-	8.65e-08
BnGRP17-A03	BnaA03g02100D	BnaC06g42740D	BBR-BPC	508	528	+	6.62e-14
BnGRP17-A03	BnaA03g02100D	BnaC07g47530D	BBR-BPC	508	537	-	2.54e-10
BnGRP17-A03	BnaA03g02100D	BnaA03g56880D	MIKC_MADS	509	529	+	1.93e-09
BnGRP17-A03	BnaA03g02100D	BnaC07g20900D	GRAS	509	528	-	1.74e-07
BnGRP17-A03	BnaA03g02100D	BnaA02g03590D	AP2/ERF	509	528	-	8.65e-08
BnGRP17-A03	BnaA03g02100D	BnaC06g42740D	BBR-BPC	510	530	+	6.62e-14
BnGRP17-A03	BnaA03g02100D	BnaC07g47530D	BBR-BPC	510	539	-	4.97e-08
BnGRP17-A03	BnaA03g02100D	BnaA03g56880D	MIKC_MADS	511	531	+	1.93e-09
BnGRP17-A03	BnaA03g02100D	BnaA02g03590D	AP2/ERF	511	530	-	8.65e-08
BnGRP17-A03	BnaA03g02100D	BnaC07g20900D	GRAS	511	530	-	1.74e-07
BnGRP17-A03	BnaA03g02100D	BnaC06g42740D	BBR-BPC	512	532	+	9.94e-12
BnGRP17-A03	BnaA03g02100D	BnaC07g47530D	BBR-BPC	512	541	-	7.4e-07
BnGRP17-A03	BnaA03g02100D	BnaC07g20900D	GRAS	513	532	-	1.96e-07
BnGRP17-A03	BnaA03g02100D	BnaA03g56880D	MIKC_MADS	513	533	+	9.08e-08
BnGRP17-A03	BnaA03g02100D	BnaA02g03590D	AP2/ERF	513	532	-	3.76e-07
BnGRP17-A03	BnaA03g02100D	BnaC06g42740D	BBR-BPC	514	534	+	2.7e-07
BnGRP17-A03	BnaA03g02100D	BnaC06g42740D	BBR-BPC	498	518	+	6.62e-14
BnGRP17-A03	BnaA03g02100D	BnaA03g56880D	MIKC_MADS	499	519	+	1.93e-09
BnGRP17-A03	BnaA03g02100D	BnaC07g20900D	GRAS	499	518	-	1.74e-07
BnGRP17-A03	BnaA03g02100D	BnaA07g24230D	Dof	227	253	-	3.31e-07
BnGRP17-A03	BnaA03g02100D	BnaA08g18130D	Dof	233	253	+	3.03e-07
BnGRP17-A03	BnaA03g02100D	BnaCnng15140D	Dof	235	253	+	7.83e-07
BnGRP17-A03	BnaA03g02100D	BnaC07g47530D	BBR-BPC	462	491	-	1.84e-07
BnGRP17-A03	BnaA03g02100D	BnaC07g47530D	BBR-BPC	464	493	-	8.86e-11
BnGRP17-A03	BnaA03g02100D	BnaA03g56880D	MIKC_MADS	1205	1225	+	4.34e-07
BnGRP17-A03	BnaA03g02100D	BnaC05g13640D	MYB_related	1567	1576	+	9.2e-07
BnGRP17-A03	BnaA03g02100D	BnaA03g56880D	MIKC_MADS	1203	1223	+	5.76e-07
BnGRP14-A03	BnaA03g02110D	BnaA09g34950D	Dof	371	391	-	6.55e-08
BnGRP14-A03	BnaA03g02110D	BnaA07g24230D	Dof	368	394	-	3.57e-07
BnGRP14-A03	BnaA03g02110D	BnaA07g12230D	Dof	369	397	-	4.82e-09
BnGRP14-A03	BnaA03g02110D	BnaA03g56880D	MIKC_MADS	373	393	-	1.11e-07
BnGRP14-A03	BnaA03g02110D	BnaA09g34950D	Dof	372	392	-	8.52e-07
BnGRP14-A03	BnaA03g02110D	BnaC09g05850D	Dof	373	393	+	5.14e-09
BnGRP14-A03	BnaA03g02110D	BnaA08g18130D	Dof	373	393	+	5.13e-08
BnGRP14-A03	BnaA03g02110D	BnaC01g01040D	Dof	360	387	-	4.14e-07
BnGRP14-A03	BnaA03g02110D	BnaA07g24230D	Dof	361	387	-	4.04e-07
BnGRP14-A03	BnaA03g02110D	BnaA07g24230D	Dof	367	393	-	1.62e-08
BnGRP14-A03	BnaA03g02110D	BnaAnng00370D	Dof	376	396	+	7.96e-07
BnGRP14-A03	BnaA03g02110D	BnaA08g01830D	Dof	376	396	+	4.72e-09
BnGRP14-A03	BnaA03g02110D	BnaC01g42310D	Dof	376	396	-	1.1e-08
BnGRP14-A03	BnaA03g02110D	BnaA02g03590D	AP2/ERF	376	395	+	9.76e-07
BnGRP14-A03	BnaA03g02110D	BnaAnng00370D	Dof	381	401	+	7.7e-07
BnGRP14-A03	BnaA03g02110D	BnaC01g42310D	Dof	382	402	-	2.96e-07
BnGRP14-A03	BnaA03g02110D	BnaC07g25410D	ZF-HD	927	941	-	2.64e-07
BnGRP14-A03	BnaA03g02110D	BnaA03g56880D	MIKC_MADS	374	394	-	1.39e-07
BnGRP14-A03	BnaA03g02110D	BnaAnng00370D	Dof	375	395	+	2.98e-09
BnGRP14-A03	BnaA03g02110D	BnaA04g16710D	Dof	375	395	-	1.44e-08
BnGRP14-A03	BnaA03g02110D	BnaC01g01040D	Dof	375	402	-	1.9e-08
BnGRP14-A03	BnaA03g02110D	BnaCnng15140D	Dof	375	393	+	7.68e-07
BnGRP14-A03	BnaA03g02110D	BnaA07g12230D	Dof	375	403	-	7.06e-08
BnGRP14-C03	BnaC03g03140D	BnaA08g01830D	Dof	367	387	+	8.58e-07
BnGRP14-C03	BnaC03g03140D	BnaA02g03590D	AP2/ERF	369	388	+	2.74e-07
BnGRP14-C03	BnaC03g03140D	BnaA09g34950D	Dof	369	389	-	4.59e-09
BnGRP14-C03	BnaC03g03140D	BnaA03g56880D	MIKC_MADS	370	390	-	4.06e-08
BnGRP14-C03	BnaC03g03140D	BnaA08g18130D	Dof	371	391	+	1.34e-07
BnGRP14-C03	BnaC03g03140D	BnaC09g05850D	Dof	371	391	+	2.56e-09
BnGRP14-C03	BnaC03g03140D	BnaA03g56880D	MIKC_MADS	371	391	-	4.62e-08
BnGRP14-C03	BnaC03g03140D	BnaAnng00370D	Dof	372	392	+	1.32e-10
BnGRP14-C03	BnaC03g03140D	BnaA04g16710D	Dof	372	392	-	4.57e-09
BnGRP14-C03	BnaC03g03140D	BnaC01g01040D	Dof	372	399	-	6.08e-09
BnGRP14-C03	BnaC03g03140D	BnaC01g01040D	Dof	357	384	-	4.92e-07
BnGRP14-C03	BnaC03g03140D	BnaA07g24230D	Dof	358	384	-	2.75e-07
BnGRP14-C03	BnaC03g03140D	BnaC09g05850D	Dof	364	384	+	4.63e-07
BnGRP14-C03	BnaC03g03140D	BnaA07g24230D	Dof	365	391	-	5.09e-09
BnGRP14-C03	BnaC03g03140D	BnaA07g12230D	Dof	366	394	-	1.93e-09
BnGRP14-C03	BnaC03g03140D	BnaA02g03590D	AP2/ERF	373	392	+	6.69e-07
BnGRP14-C03	BnaC03g03140D	BnaA03g56880D	MIKC_MADS	374	394	-	1.94e-07
BnGRP14-C03	BnaC03g03140D	BnaA08g01830D	Dof	374	394	+	2.52e-08
BnGRP14-C03	BnaC03g03140D	BnaA08g02650D	B3	723	737	-	9.44e-07
BnGRP14-C03	BnaC03g03140D	BnaA07g12230D	Dof	373	401	-	1.45e-08
BnGRP14-C03	BnaC03g03140D	BnaAnng00370D	Dof	373	393	+	3.1e-07
BnGRP14-C03	BnaC03g03140D	BnaC01g42310D	Dof	373	393	-	5.66e-09
BnGRP14-C03	BnaC03g03140D	BnaC09g12040D	Dof	373	391	+	8.09e-07
BnGRP17-Cnn	BnaCnng60890D	BnaA03g08030D	MIKC_MADS	1702	1715	+	8.83e-07
BnGRP17-Cnn	BnaCnng60890D	BnaC07g47530D	BBR-BPC	878	907	+	1.31e-07
BnGRP17-Cnn	BnaCnng60890D	BnaC06g42740D	BBR-BPC	879	899	-	4.53e-07
BnGRP17-Cnn	BnaCnng60890D	BnaC07g47530D	BBR-BPC	880	909	+	4.29e-09
BnGRP17-Cnn	BnaCnng60890D	BnaC06g42740D	BBR-BPC	881	901	-	7.96e-07
BnGRP17-Cnn	BnaCnng60890D	BnaC07g47530D	BBR-BPC	890	919	+	6.89e-07
BnGRP17-Cnn	BnaCnng60890D	BnaA03g56880D	MIKC_MADS	902	922	-	1.33e-07
BnGRP17-Cnn	BnaCnng60890D	BnaC07g00810D	CPP	1659	1673	+	7.89e-07
BnGRP17-Cnn	BnaCnng60890D	BnaCnng36180D	MIKC_MADS	1702	1715	+	8.83e-07
BnGRP17-Cnn	BnaCnng60890D	BnaC06g42740D	BBR-BPC	877	897	-	3.46e-07
BnGRP17-Cnn	BnaCnng60890D	BnaC07g47530D	BBR-BPC	882	911	+	7.59e-09
BnGRP17-Cnn	BnaCnng60890D	BnaA08g02650D	B3	667	681	+	5.51e-07
BnGRP17-Cnn	BnaCnng60890D	BnaC07g47530D	BBR-BPC	866	895	+	9.33e-07
BnGRP17-Cnn	BnaCnng60890D	BnaC07g47530D	BBR-BPC	868	897	+	9.78e-07
BnGRP17-Cnn	BnaCnng60890D	BnaC07g47530D	BBR-BPC	872	901	+	9.07e-09
BnGRP17-Cnn	BnaCnng60890D	BnaC07g47530D	BBR-BPC	874	903	+	8.46e-09
BnGRP17-Cnn	BnaCnng60890D	BnaC06g42740D	BBR-BPC	875	895	-	1.12e-07
BnGRP17-Cnn	BnaCnng60890D	BnaC07g47530D	BBR-BPC	876	905	+	1.48e-07
BnGRP17-Cnn	BnaCnng60890D	BnaC07g47530D	BBR-BPC	886	915	+	3.35e-07
BnGRP17-Cnn	BnaCnng60890D	BnaC07g47530D	BBR-BPC	888	917	+	4.86e-08
BnGRP17-Cnn	BnaCnng60890D	BnaC06g42740D	BBR-BPC	883	903	-	2.46e-07
BnGRP17-Cnn	BnaCnng60890D	BnaC07g47530D	BBR-BPC	884	913	+	2.15e-08
BnGRP17-A10c	BnaA10g23970D	BnaA02g06480D	B3	1105	1123	+	4.8e-07
BnGRP17-A10c	BnaA10g23970D	BnaA07g24230D	Dof	1105	1131	-	3.8e-07
BnGRP17-A10c	BnaA10g23970D	BnaCnng66730D	ZF-HD	1587	1601	-	7.96e-07
BnGRP17-A10c	BnaA10g23970D	BnaA07g12230D	Dof	1715	1743	-	2.94e-07
BnGRP17-A10b	BnaA10g23960D	BnaC07g47530D	BBR-BPC	38	67	+	9.91e-07
BnGRP17-A10b	BnaA10g23960D	BnaA07g17790D	NAC	132	152	-	7.99e-07
BnGRP18-A08	BnaA08g22860D	BnaC02g31510D	BES1	61	75	+	4.25e-07
BnGRP18-A08	BnaA08g22860D	BnaC01g01040D	Dof	99	126	+	8.22e-07
BnGRP18-A08	BnaA08g22860D	BnaA07g12230D	Dof	104	132	+	8.88e-09
BnGRP18-A08	BnaA08g22860D	BnaA02g03590D	AP2/ERF	105	124	-	7.48e-07
BnGRP18-A08	BnaA08g22860D	BnaC03g38340D	Trihelix	148	158	-	5.94e-08
BnGRP18-A08	BnaA08g22860D	BnaA03g56880D	MIKC_MADS	109	129	+	1.79e-07
BnGRP18-A08	BnaA08g22860D	BnaC07g20900D	GRAS	109	128	-	6.8e-08
BnGRP18-A08	BnaA08g22860D	BnaA02g03590D	AP2/ERF	110	129	-	6.53e-07
BnGRP18-A08	BnaA08g22860D	BnaA07g12230D	Dof	110	138	+	1.01e-07
BnGRP18-A08	BnaA08g22860D	BnaA03g56880D	MIKC_MADS	111	131	+	2.32e-07
BnGRP18-A08	BnaA08g22860D	BnaAnng00370D	Dof	112	132	-	5.8e-07
BnGRP18-A08	BnaA08g22860D	BnaA03g56880D	MIKC_MADS	113	133	+	3.65e-08
BnGRP18-A08	BnaA08g22860D	BnaA02g03590D	AP2/ERF	113	132	-	6.13e-09
BnGRP18-A08	BnaA08g22860D	BnaA07g24230D	Dof	114	140	+	7.11e-08
BnGRP18-A08	BnaA08g22860D	BnaC01g01040D	Dof	105	132	+	1.32e-08
BnGRP18-A08	BnaA08g22860D	BnaAnng00370D	Dof	106	126	-	7.71e-08
BnGRP18-A08	BnaA08g22860D	BnaA04g16710D	Dof	106	126	+	5.67e-07
BnGRP18-A08	BnaA08g22860D	BnaA03g56880D	MIKC_MADS	107	127	+	2.24e-09
BnGRP18-A08	BnaA08g22860D	BnaA10g24930D	Trihelix	147	161	+	5.45e-07
BnGRP18-A08	BnaA08g22860D	BnaA03g56880D	MIKC_MADS	115	135	+	2.23e-07
BnGRP18-A08	BnaA08g22860D	BnaA02g03590D	AP2/ERF	115	134	-	3.81e-10
BnGRP18-A08	BnaA08g22860D	BnaC06g16720D	Trihelix	146	160	+	1.11e-07
BnGRP14-C09	BnaC09g47930D	BnaA07g18730D	GATA	114	128	-	7.92e-07
BnGRP14-C09	BnaC09g47930D	BnaA05g06600D	MYB	186	206	+	4.8e-07
BnGRP14-C09	BnaC09g47930D	BnaA10g24770D	MYB	189	203	-	4.07e-07
BnGRP14-C09	BnaC09g47930D	BnaA07g18730D	GATA	231	245	-	5.67e-08
BnGRP14-C09	BnaC09g47930D	BnaA06g27920D	GATA	231	243	+	8.09e-07
BnGRP14-C09	BnaC09g47930D	BnaA03g39760D	Dof	1324	1337	-	1.09e-07
BnGRP14-C09	BnaC09g47930D	BnaCnng15140D	Dof	1325	1343	-	6.74e-07
BnGRP14-C09	BnaC09g47930D	BnaA08g18130D	Dof	1325	1345	-	7.68e-07
BnGRP14-C09	BnaC09g47930D	BnaA06g24080D	AP2/ERF	1958	1972	+	9.01e-08
BnGRP14-C09	BnaC09g47930D	BnaA07g21680D	AP2/ERF	1958	1972	+	2.67e-07
BnGRP14-C09	BnaC09g47930D	BnaC06g00880D	AP2/ERF	1958	1972	+	1.52e-07
BnGRP14-C09	BnaC09g47930D	BnaAnng03730D	AP2/ERF	1958	1972	+	9.02e-07
BnGRP14-C09	BnaC09g47930D	BnaC09g20100D	AP2/ERF	1958	1972	+	5.45e-07
BnGRP14-C09	BnaC09g47930D	BnaA09g52130D	MYB	1958	1971	+	1.64e-07
BnGRP17-A10a	BnaA10g23950D	BnaA07g18730D	GATA	959	973	+	7.48e-07
BnGRP17-A10a	BnaA10g23950D	BnaC05g05680D	GATA	960	974	-	4.13e-07
BnGRP17-A10a	BnaA10g23950D	BnaC06g00880D	AP2/ERF	1954	1968	+	1.52e-07
BnGRP17-A10a	BnaA10g23950D	BnaC09g20100D	AP2/ERF	1954	1968	+	5.45e-07
BnGRP17-A10a	BnaA10g23950D	BnaA06g24080D	AP2/ERF	1954	1968	+	9.01e-08
BnGRP17-A10a	BnaA10g23950D	BnaAnng03730D	AP2/ERF	1954	1968	+	9.02e-07
BnGRP17-A10a	BnaA10g23950D	BnaA09g52130D	MYB	1954	1967	+	1.64e-07
BnGRP17-A10a	BnaA10g23950D	BnaA07g21680D	AP2/ERF	1954	1968	+	2.67e-07
BnGRP16-A10	BnaA10g30180D	BnaC02g06270D	bZIP	159	173	-	5.02e-07
BnGRP16-A10	BnaA10g30180D	BnaC06g22430D	bZIP	159	173	-	5.04e-07
BnGRP16-A10	BnaA10g30180D	BnaA07g01890D	bZIP	159	173	-	6.36e-07
BnGRP16-A10	BnaA10g30180D	BnaA10g13430D	bZIP	159	173	+	4.95e-07
BnGRP16-A10	BnaA10g30180D	BnaC03g65930D	bZIP	159	173	+	4.95e-07
BnGRP16-A10	BnaA10g30180D	BnaA09g39870D	bZIP	159	173	-	5.12e-07
BnGRP16-A10	BnaA10g30180D	BnaA10g21200D	bZIP	159	173	-	9.26e-07
BnGRP16-A10	BnaA10g30180D	BnaA08g11080D	bZIP	159	173	+	4.95e-07
BnGRP16-A10	BnaA10g30180D	BnaC09g22200D	bZIP	160	173	+	1.26e-07
BnGRP16-A10	BnaA10g30180D	BnaC02g39310D	bZIP	160	171	-	1.7e-07
BnGRP16-A10	BnaA10g30180D	BnaA09g19470D	bZIP	160	173	+	1.26e-07
BnGRP16-A10	BnaA10g30180D	BnaA06g39730D	bZIP	160	171	-	1.63e-07
BnGRP16-A10	BnaA10g30180D	BnaC06g00420D	bZIP	196	213	+	9.05e-08
BnGRP16-A10	BnaA10g30180D	BnaA05g08020D	bZIP	199	216	-	2.32e-07
BnGRP16-A10	BnaA10g30180D	BnaC05g24270D	bZIP	201	215	+	5.17e-07
BnGRP16-A10	BnaA10g30180D	BnaC04g09600D	bZIP	201	215	-	4.63e-07
BnGRP16-A10	BnaA10g30180D	BnaA09g24670D	bZIP	201	215	-	3.56e-07
BnGRP16-A10	BnaA10g30180D	BnaC08g27660D	bZIP	201	215	-	2.38e-07
BnGRP16-A10	BnaA10g30180D	BnaA08g02650D	B3	1119	1133	-	4.38e-07
BnGRP16-A10	BnaA10g30180D	BnaA08g02650D	B3	1120	1134	-	8.06e-08
BnGRP16-A10	BnaA10g30180D	BnaC08g18470D	MYB_related	1316	1337	+	6.84e-07
BnGRP16-A10	BnaA10g30180D	BnaA03g30340D	MYB	1324	1334	-	5.48e-07
BnGRP16-Cnn	BnaCnng36370D	BnaC08g18470D	MYB_related	1207	1228	+	6.84e-07
BnGRP16-Cnn	BnaCnng36370D	BnaA03g30340D	MYB	1215	1225	-	5.48e-07
BnGRP16-Cnn	BnaCnng36370D	BnaA08g02650D	B3	1519	1533	+	1.3e-08
BnGRP16-Cnn	BnaCnng36370D	BnaA08g02650D	B3	1520	1534	+	7.57e-07
BnGRP19-Cnn	BnaCnng36380D	BnaA08g02650D	B3	1259	1273	-	1.24e-07
BnGRP19-Cnn	BnaCnng36380D	BnaA08g02650D	B3	1260	1274	-	1.24e-07
BnGRP19-Cnn	BnaCnng36380D	BnaA08g02650D	B3	1261	1275	-	2.76e-07
BnGRP19-Cnn	BnaCnng36380D	BnaA08g02650D	B3	1262	1276	-	1.44e-07
BnGRP19-Cnn	BnaCnng36380D	BnaA08g02650D	B3	1263	1277	-	6.57e-07
BnGRP19-C03	BnaC03g03150D	BnaA07g24230D	Dof	1757	1783	-	8.57e-07
BnOLEO11-C07	BnaC07g31360D	BnaA07g24230D	Dof	1718	1744	-	4.49e-07
BnOLEO11-C07	BnaC07g31360D	BnaA07g14730D	NAC	1910	1924	+	7.15e-07
BnOLEO11-A03	BnaA03g40390D	BnaA09g19070D	NAC	1837	1855	-	3.35e-07
BnOLEO11-A03	BnaA03g40390D	BnaA07g14730D	NAC	1909	1923	+	7.15e-07
BnOLEO9-A03	BnaA03g02140D	BnaC03g05760D	WRKY	357	369	-	4.28e-07
BnOLEO9-A03	BnaA03g02140D	BnaAnng01980D	WRKY	357	369	-	6.09e-07
BnOLEO9-A03	BnaA03g02140D	BnaA04g14500D	WRKY	357	370	-	3.31e-07
BnOLEO9-A03	BnaA03g02140D	BnaA01g34790D	WRKY	357	370	+	3.45e-07
BnOLEO9-A03	BnaA03g02140D	BnaC02g26030D	WRKY	357	371	+	3.26e-07
BnOLEO9-A03	BnaA03g02140D	BnaC01g16120D	WRKY	357	370	+	1.78e-07
BnOLEO9-A03	BnaA03g02140D	BnaC01g06900D	WRKY	357	370	+	3.45e-07
BnOLEO9-A03	BnaA03g02140D	BnaC09g19320D	WRKY	357	371	-	9.51e-08
BnOLEO9-A03	BnaA03g02140D	BnaC05g23680D	WRKY	357	369	-	4.79e-07
BnOLEO9-A03	BnaA03g02140D	BnaA02g10650D	WRKY	357	369	+	3.65e-07
BnOLEO9-A03	BnaA03g02140D	BnaA03g04160D	WRKY	357	369	-	4.28e-07
BnOLEO9-A03	BnaA03g02140D	BnaC07g35130D	WRKY	357	369	+	2.36e-07
BnOLEO9-A03	BnaA03g02140D	BnaA07g16850D	WRKY	357	369	+	5.46e-07
BnOLEO9-A03	BnaA03g02140D	BnaC02g27650D	WRKY	357	369	-	4.04e-07
BnOLEO9-A03	BnaA03g02140D	BnaCnng11190D	WRKY	358	371	+	8.05e-08
BnOLEO9-A03	BnaA03g02140D	BnaC07g30300D	WRKY	358	368	-	9.72e-07
BnOLEO9-A03	BnaA03g02140D	BnaCnng13810D	WRKY	359	370	-	3.6e-07
BnOLEO9-A03	BnaA03g02140D	BnaC03g21360D	WRKY	359	369	-	3.6e-07
BnOLEO9-A03	BnaA03g02140D	BnaC04g38910D	WRKY	359	370	+	1.16e-07
BnOLEO9-A03	BnaA03g02140D	BnaC07g09430D	WRKY	359	369	-	3.6e-07
BnOLEO9-A03	BnaA03g02140D	BnaC03g16740D	WRKY	359	369	-	3.6e-07
BnOLEO9-A03	BnaA03g02140D	BnaC03g65200D	WRKY	359	369	-	3.6e-07
BnOLEO9-A03	BnaA03g02140D	BnaC07g49530D	WRKY	359	371	+	7.87e-08
BnOLEO9-A03	BnaA03g02140D	BnaA08g10660D	WRKY	359	369	-	3.6e-07
BnOLEO9-A03	BnaA03g02140D	BnaC04g13870D	WRKY	359	369	-	3.6e-07
BnOLEO9-A03	BnaA03g02140D	BnaA05g01410D	WRKY	359	369	-	5.58e-07
BnOLEO9-A03	BnaA03g02140D	BnaA04g13570D	WRKY	359	369	-	3.6e-07
BnOLEO9-A03	BnaA03g02140D	BnaC05g22280D	WRKY	359	369	-	3.6e-07
BnOLEO9-A03	BnaA03g02140D	BnaC07g22240D	WRKY	359	369	-	3.6e-07
BnOLEO9-A03	BnaA03g02140D	BnaA08g02650D	B3	397	411	-	1.7e-07
BnOLEO9-A03	BnaA03g02140D	BnaC09g36070D	C2H2	1340	1354	+	1.32e-07
BnOLEO9-A03	BnaA03g02140D	BnaA10g24770D	MYB	1356	1370	-	6.8e-07
BnOLEO9-A03	BnaA03g02140D	BnaC01g01040D	Dof	1746	1773	-	1.73e-07
BnOLEO9-A03	BnaA03g02140D	BnaA07g24230D	Dof	1786	1812	-	6.14e-07
BnGRP20-C03	BnaC03g03170D	BnaA07g23270D	C2H2	466	484	-	4.8e-07
BnGRP20-C03	BnaC03g03170D	BnaA07g31600D	Nin-like	469	487	-	2.85e-07
BnGRP20-C03	BnaC03g03170D	BnaA07g12230D	Dof	1740	1768	-	7.78e-07
BnGRP20-C03	BnaC03g03170D	BnaC01g01040D	Dof	1746	1773	-	3.48e-07
BnGRP20-C03	BnaC03g03170D	BnaA07g24230D	Dof	1786	1812	-	6.14e-07
BnGRP20-Anna	BnaAnng06430D	BnaA01g08370D	NAC	43	57	+	9.43e-07
BnGRP20-Anna	BnaAnng06430D	BnaC01g42310D	Dof	356	376	-	9.62e-07
BnGRP20-Anna	BnaAnng06430D	BnaA02g03590D	AP2/ERF	361	380	+	2.71e-07
BnGRP20-Anna	BnaAnng06430D	BnaA02g03590D	AP2/ERF	364	383	+	5.62e-07
BnGRP20-Anna	BnaAnng06430D	BnaC07g20900D	GRAS	365	384	+	3.16e-07
BnGRP20-Anna	BnaAnng06430D	BnaA02g03590D	AP2/ERF	1473	1492	+	6.69e-07
BnGRP20-Anna	BnaAnng06430D	BnaA02g03590D	AP2/ERF	1477	1496	+	2.06e-07
BnGRP20-C02a	BnaC02g01550D	BnaA01g23940D	AP2/ERF	392	419	-	7.03e-08
BnGRP20-C02a	BnaC02g01550D	BnaA02g22560D	AP2/ERF	393	413	+	4.96e-07
BnGRP20-C02a	BnaC02g01550D	BnaC02g30930D	AP2/ERF	393	413	+	4.96e-07
BnGRP20-C02a	BnaC02g01550D	BnaA06g23710D	AP2/ERF	394	412	+	4.24e-07
BnGRP20-C02a	BnaC02g01550D	BnaC09g06610D	AP2/ERF	394	412	+	4.24e-07
BnGRP20-C02a	BnaC02g01550D	BnaA03g04570D	AP2/ERF	394	414	-	1.46e-07
BnGRP20-C02a	BnaC02g01550D	BnaA02g32120D	AP2/ERF	396	414	+	1.37e-07
BnGRP20-C02a	BnaC02g01550D	BnaA08g00990D	AP2/ERF	396	416	+	2.72e-08
BnGRP20-C02a	BnaC02g01550D	BnaA02g22560D	AP2/ERF	396	416	+	1.21e-07
BnGRP20-C02a	BnaC02g01550D	BnaC02g30930D	AP2/ERF	396	416	+	1.21e-07
BnGRP20-C02a	BnaC02g01550D	BnaA03g04570D	AP2/ERF	397	417	-	1.24e-07
BnGRP20-C02a	BnaC02g01550D	BnaA06g23710D	AP2/ERF	397	415	+	3.68e-07
BnGRP20-C02a	BnaC02g01550D	BnaC09g06610D	AP2/ERF	397	415	+	3.68e-07
BnGRP20-C02a	BnaC02g01550D	BnaA03g52830D	AP2/ERF	398	412	+	5.92e-07
BnGRP20-C02a	BnaC02g01550D	BnaA08g11220D	AP2/ERF	398	412	+	5.92e-07
BnGRP20-C02a	BnaC02g01550D	BnaA01g34910D	AP2/ERF	399	419	-	1.08e-07
BnGRP20-C02a	BnaC02g01550D	BnaA07g23090D	AP2/ERF	399	419	-	1.24e-07
BnGRP20-C02a	BnaC02g01550D	BnaA02g32120D	AP2/ERF	399	417	+	9.22e-07
BnGRP20-C02a	BnaC02g01550D	BnaC09g27360D	AP2/ERF	401	415	+	3.69e-07
BnGRP20-C02a	BnaC02g01550D	BnaA01g34910D	AP2/ERF	402	422	-	9.08e-07
BnGRP20-C02a	BnaC02g01550D	BnaA06g24080D	AP2/ERF	402	416	-	4.41e-07
BnGRP20-C02a	BnaC02g01550D	BnaC07g08360D	AP2/ERF	402	416	+	5.75e-08
BnGRP20-C02a	BnaC02g01550D	BnaA09g27300D	AP2/ERF	402	416	-	2.34e-07
BnGRP20-C02a	BnaC02g01550D	BnaC03g39000D	AP2/ERF	402	416	-	1.49e-07
BnGRP20-C02a	BnaC02g01550D	BnaC02g08170D	AP2/ERF	402	416	-	8.07e-08
BnGRP20-C02a	BnaC02g01550D	BnaC09g20100D	AP2/ERF	402	416	-	5.45e-07
BnGRP20-C02a	BnaC02g01550D	BnaCnng60520D	AP2/ERF	402	422	-	4.41e-07
BnGRP20-C02a	BnaC02g01550D	BnaA05g09970D	AP2/ERF	402	416	-	2.15e-07
BnGRP20-C02a	BnaC02g01550D	BnaC06g03860D	AP2/ERF	402	416	+	2.41e-07
BnGRP20-C02a	BnaC02g01550D	BnaA03g02000D	AP2/ERF	402	416	-	7.81e-07
BnGRP20-C02a	BnaC02g01550D	BnaC07g10670D	AP2/ERF	402	416	+	1.82e-07
BnGRP20-C02a	BnaC02g01550D	BnaA07g24590D	AP2/ERF	402	416	-	5.03e-08
BnGRP20-C02a	BnaC02g01550D	BnaC04g55440D	AP2/ERF	403	413	-	8.42e-07
BnGRP20-C02a	BnaC02g01550D	BnaA03g40380D	AP2/ERF	403	421	-	6.67e-08
BnGRP20-C02a	BnaC02g01550D	BnaC08g04820D	AP2/ERF	404	416	+	8.13e-07
BnGRP20-C02a	BnaC02g01550D	BnaCnng77210D	AP2/ERF	404	418	-	9.34e-07
BnGRP20-C02a	BnaC02g01550D	BnaC09g17590D	AP2/ERF	404	413	-	3.04e-08
BnGRP20-C02a	BnaC02g01550D	BnaA08g04090D	AP2/ERF	404	416	+	8.13e-07
BnGRP20-C02a	BnaC02g01550D	BnaAnng40920D	AP2/ERF	404	418	-	7.18e-08
BnGRP20-C02a	BnaC02g01550D	BnaC06g03860D	AP2/ERF	405	419	+	3.2e-07
BnGRP20-C02a	BnaC02g01550D	BnaC05g21820D	AP2/ERF	405	412	-	9.68e-07
BnGRP20-C02a	BnaC02g01550D	BnaA07g08450D	AP2/ERF	405	412	-	9.68e-07
BnGRP20-C02a	BnaC02g01550D	BnaA09g50010D	AP2/ERF	405	412	-	9.68e-07
BnGRP20-C02a	BnaC02g01550D	BnaA05g09970D	AP2/ERF	405	419	-	3.45e-07
BnGRP20-C02a	BnaC02g01550D	BnaA07g24590D	AP2/ERF	405	419	-	5.13e-07
BnGRP20-C02a	BnaC02g01550D	BnaA06g24080D	AP2/ERF	405	419	-	7.16e-07
BnGRP20-C02a	BnaC02g01550D	BnaCnng60520D	AP2/ERF	405	425	-	9.59e-07
BnGRP20-C02a	BnaC02g01550D	BnaC09g20100D	AP2/ERF	405	419	-	4.89e-07
BnGRP20-C02a	BnaC02g01550D	BnaC07g10670D	AP2/ERF	405	419	+	2.96e-07
BnGRP20-C02a	BnaC02g01550D	BnaC07g10480D	AP2/ERF	405	412	-	9.68e-07
BnGRP20-C02a	BnaC02g01550D	BnaC07g08360D	AP2/ERF	405	419	+	5.04e-07
BnGRP20-C02a	BnaC02g01550D	BnaC09g37870D	AP2/ERF	405	419	-	5.67e-07
BnGRP20-C02a	BnaC02g01550D	BnaA07g21680D	AP2/ERF	405	419	-	8.79e-07
BnGRP20-C02a	BnaC02g01550D	BnaC04g55440D	AP2/ERF	406	416	-	5.75e-07
BnGRP20-C02a	BnaC02g01550D	BnaA01g13420D	AP2/ERF	406	413	-	9.68e-07
BnGRP20-C02a	BnaC02g01550D	BnaC01g01040D	Dof	526	553	-	9.63e-08
BnGRP20-C02a	BnaC02g01550D	BnaC01g01040D	Dof	530	557	-	9.24e-07
BnGRP20-C02a	BnaC02g01550D	BnaA07g24230D	Dof	530	556	-	1.42e-07
BnGRP20-C02a	BnaC02g01550D	BnaA09g34950D	Dof	534	554	-	1.16e-07
BnGRP20-C02a	BnaC02g01550D	BnaC09g05850D	Dof	536	556	+	1.28e-07
BnGRP20-C02a	BnaC02g01550D	BnaA02g03590D	AP2/ERF	539	558	+	8.45e-07
BnGRP20-C02a	BnaC02g01550D	BnaA07g24230D	Dof	583	609	-	5.1e-08
BnGRP20-C02a	BnaC02g01550D	BnaA09g34950D	Dof	587	607	-	1.95e-07
BnGRP20-C02a	BnaC02g01550D	BnaA07g24230D	Dof	589	615	-	2.52e-09
BnGRP20-C02a	BnaC02g01550D	BnaC01g01040D	Dof	589	616	-	8.46e-07
BnGRP20-C02a	BnaC02g01550D	BnaA07g12230D	Dof	591	619	-	9.08e-10
BnGRP20-C02a	BnaC02g01550D	BnaC01g01040D	Dof	591	618	-	1.34e-07
BnGRP20-C02a	BnaC02g01550D	BnaA08g01830D	Dof	592	612	+	5.49e-08
BnGRP20-C02a	BnaC02g01550D	BnaA09g34950D	Dof	593	613	-	1.99e-07
BnGRP20-C02a	BnaC02g01550D	BnaA02g03590D	AP2/ERF	595	614	+	7.48e-07
BnGRP20-C02a	BnaC02g01550D	BnaC09g05850D	Dof	595	615	+	1.6e-07
BnGRP20-C02a	BnaC02g01550D	BnaA03g56880D	MIKC_MADS	596	616	-	1.27e-07
BnGRP20-C02a	BnaC02g01550D	BnaC01g01040D	Dof	597	624	-	1.1e-08
BnGRP20-C02a	BnaC02g01550D	BnaAnng00370D	Dof	597	617	+	6e-09
BnGRP20-C02a	BnaC02g01550D	BnaA04g16710D	Dof	597	617	-	1.36e-08
BnGRP20-C02a	BnaC02g01550D	BnaA02g03590D	AP2/ERF	597	616	+	2.79e-07
BnGRP20-C02a	BnaC02g01550D	BnaA07g12230D	Dof	597	625	-	1.32e-07
BnGRP20-C02a	BnaC02g01550D	BnaA08g01830D	Dof	598	618	+	5.49e-08
BnGRP20-C02a	BnaC02g01550D	BnaC01g42310D	Dof	598	618	-	3.11e-07
BnGRP20-C02a	BnaC02g01550D	BnaA02g03590D	AP2/ERF	598	617	+	9.3e-07
BnGRP20-Annb	BnaAnng06440D	BnaC08g06930D	C2H2	460	474	-	4.35e-07
BnGRP20-Annb	BnaAnng06440D	BnaA06g14540D	Nin-like	544	558	+	2.28e-07
BnGRP20-C02b	BnaC02g01560D	BnaC08g06930D	C2H2	431	445	-	4.35e-07
BnGRP20-C02b	BnaC02g01560D	BnaAnng31240D	LBD	484	504	-	7.74e-07
BnGRP20-C02b	BnaC02g01560D	BnaCnng60770D	LBD	484	504	-	7.74e-07
BnGRP20-C02b	BnaC02g01560D	BnaA06g14540D	Nin-like	515	529	+	2.28e-07
BnGRP20-C02b	BnaC02g01560D	BnaA07g02390D	WOX	1131	1141	-	6.56e-07
BnOLEO4-A02	BnaA02g29000D	BnaA07g12230D	Dof	475	503	-	5.26e-07
BnOLEO4-A02	BnaA02g29000D	BnaA07g24230D	Dof	479	505	-	7.53e-07
BnOLEO4-A02	BnaA02g29000D	BnaA04g16710D	Dof	481	501	-	2.55e-07
BnOLEO4-A02	BnaA02g29000D	BnaC01g01040D	Dof	481	508	-	1.09e-07
BnOLEO4-A02	BnaA02g29000D	BnaAnng00370D	Dof	481	501	+	1.57e-07
BnOLEO4-A02	BnaA02g29000D	BnaC01g42310D	Dof	482	502	-	2.51e-08
BnOLEO4-A02	BnaA02g29000D	BnaA02g03590D	AP2/ERF	1002	1021	+	7.12e-07
BnOLEO4-A02	BnaA02g29000D	BnaA08g02650D	B3	1238	1252	-	2.39e-07
BnOLEO4-A02	BnaA02g29000D	BnaC07g20900D	GRAS	1732	1751	+	7.25e-07
BnOLEO4-C02	BnaC02g37030D	BnaA03g56880D	MIKC_MADS	365	385	+	4.74e-08
BnOLEO4-C02	BnaC02g37030D	BnaA03g56880D	MIKC_MADS	1749	1769	-	8.48e-07
BnOLEO2-C04	BnaC04g32530D	BnaC02g36350D	B3	1571	1585	+	5.98e-07
BnOLEO2-C04	BnaC04g32530D	BnaC09g05850D	Dof	1764	1784	+	5.77e-07
BnOLEO2-C04	BnaC04g32530D	BnaA07g12230D	Dof	1766	1794	-	6.51e-08
BnOLEO2-C04	BnaC04g32530D	BnaA04g16710D	Dof	1772	1792	-	1.68e-08
BnOLEO2-C04	BnaC04g32530D	BnaC01g01040D	Dof	1772	1799	-	4.69e-07
BnOLEO2-C04	BnaC04g32530D	BnaAnng00370D	Dof	1772	1792	+	8.99e-08
BnOLEO2-C04	BnaC04g32530D	BnaC04g45310D	Dof	1772	1786	-	9.6e-07
BnOLEO2-C04	BnaC04g32530D	BnaC01g42310D	Dof	1773	1793	-	4.57e-08
BnOLEO2-C04	BnaC04g32530D	BnaA02g03590D	AP2/ERF	1773	1792	+	5.07e-07
BnOLEO2-C06	BnaC06g12930D	BnaC06g16720D	Trihelix	997	1011	+	1.86e-07
BnOLEO2-C06	BnaC06g12930D	BnaA10g24930D	Trihelix	998	1012	+	9.07e-07
BnOLEO2-C06	BnaC06g12930D	BnaC03g38340D	Trihelix	999	1009	-	2.27e-07
BnOLEO2-C06	BnaC06g12930D	BnaC03g00290D	Trihelix	1219	1235	-	4.63e-07
BnOLEO2-C06	BnaC06g12930D	BnaA07g24230D	Dof	1778	1804	-	5.29e-07
BnOLEO2-C06	BnaC06g12930D	BnaA07g12230D	Dof	1780	1808	-	1.2e-07
BnOLEO2-C06	BnaC06g12930D	BnaA07g12230D	Dof	1786	1814	-	3.08e-08
BnOLEO2-C06	BnaC06g12930D	BnaC01g01040D	Dof	1786	1813	-	2.29e-07
BnOLEO2-C06	BnaC06g12930D	BnaC01g42310D	Dof	1787	1807	-	3.51e-07
BnOLEO2-C06	BnaC06g12930D	BnaC01g01040D	Dof	1787	1814	-	6e-07
BnOLEO2-C06	BnaC06g12930D	BnaA08g01830D	Dof	1787	1807	+	3.7e-07
BnOLEO2-C06	BnaC06g12930D	BnaA02g03590D	AP2/ERF	1789	1808	+	5.83e-07
BnOLEO2-C06	BnaC06g12930D	BnaA03g56880D	MIKC_MADS	1790	1810	-	8.9e-07
BnOLEO2-C06	BnaC06g12930D	BnaA03g56880D	MIKC_MADS	1791	1811	-	2.57e-07
BnOLEO2-C06	BnaC06g12930D	BnaC01g01040D	Dof	1792	1819	-	3.81e-08
BnOLEO2-C06	BnaC06g12930D	BnaAnng00370D	Dof	1792	1812	+	2.14e-07
BnOLEO2-C06	BnaC06g12930D	BnaA07g12230D	Dof	1793	1821	-	3.56e-07
BnOLEO2-C06	BnaC06g12930D	BnaA03g56880D	MIKC_MADS	1794	1814	-	4.58e-07
BnOLEO2-C06	BnaC06g12930D	BnaA02g03590D	AP2/ERF	1796	1815	+	2.91e-07
BnOLEO2-C06	BnaC06g12930D	BnaA03g56880D	MIKC_MADS	1798	1818	-	4.58e-07
BnOLEO2-C06	BnaC06g12930D	BnaC01g01040D	Dof	1799	1826	-	3.71e-07
BnOLEO2-C06	BnaC06g12930D	BnaA02g03590D	AP2/ERF	1799	1818	+	2.42e-07
BnOLEO2-C06	BnaC06g12930D	BnaA07g12230D	Dof	1800	1828	-	2.59e-07
BnOLEO2-C06	BnaC06g12930D	BnaA03g56880D	MIKC_MADS	1801	1821	-	9.96e-07
BnOLEO2-C06	BnaC06g12930D	BnaA02g03590D	AP2/ERF	1803	1822	+	2.91e-07
BnOLEO2-C06	BnaC06g12930D	BnaA03g56880D	MIKC_MADS	1805	1825	-	4.58e-07
BnOLEO2-C06	BnaC06g12930D	BnaC01g01040D	Dof	1806	1833	-	3.71e-07
BnOLEO2-C06	BnaC06g12930D	BnaA02g03590D	AP2/ERF	1806	1825	+	2.42e-07
BnOLEO2-C06	BnaC06g12930D	BnaA07g12230D	Dof	1807	1835	-	2.59e-07
BnOLEO2-C06	BnaC06g12930D	BnaA03g56880D	MIKC_MADS	1808	1828	-	9.96e-07
BnOLEO2-C06	BnaC06g12930D	BnaA02g03590D	AP2/ERF	1810	1829	+	2.91e-07
BnOLEO2-C06	BnaC06g12930D	BnaA03g56880D	MIKC_MADS	1812	1832	-	4.58e-07
BnOLEO2-C06	BnaC06g12930D	BnaA02g03590D	AP2/ERF	1813	1832	+	2.42e-07
BnOLEO2-C06	BnaC06g12930D	BnaA03g56880D	MIKC_MADS	1815	1835	-	9.96e-07
BnOLEO2-C06	BnaC06g12930D	BnaA02g03590D	AP2/ERF	1817	1836	+	2.91e-07
BnOLEO2-A07	BnaA07g14960D	BnaA06g27670D	AP2/ERF	702	722	-	5.72e-10
BnOLEO2-A07	BnaA07g14960D	BnaC07g29370D	AP2/ERF	702	722	-	5.72e-10
BnOLEO2-A07	BnaA07g14960D	BnaA04g29310D	AP2/ERF	702	722	+	9.38e-07
BnOLEO2-A07	BnaA07g14960D	BnaA03g40380D	AP2/ERF	702	720	-	2.47e-07
BnOLEO2-A07	BnaA07g14960D	BnaA08g13860D	AP2/ERF	702	721	+	2.91e-10
BnOLEO2-A07	BnaA07g14960D	BnaCnng60770D	LBD	702	722	-	1.21e-08
BnOLEO2-A07	BnaA07g14960D	BnaA07g10270D	AP2/ERF	702	716	+	2.26e-07
BnOLEO2-A07	BnaA07g14960D	BnaC09g39350D	AP2/ERF	702	716	+	7.49e-07
BnOLEO2-A07	BnaA07g14960D	BnaA01g23940D	AP2/ERF	703	730	-	2.25e-10
BnOLEO2-A07	BnaA07g14960D	BnaCnng14500D	LBD	704	724	-	8.58e-07
BnOLEO2-A07	BnaA07g14960D	BnaA02g12180D	LBD	704	724	-	8.58e-07
BnOLEO2-A07	BnaA07g14960D	BnaA02g15420D	AP2/ERF	704	723	-	4.92e-08
BnOLEO2-A07	BnaA07g14960D	BnaA02g22560D	AP2/ERF	704	724	+	1.97e-07
BnOLEO2-A07	BnaA07g14960D	BnaCnng60520D	AP2/ERF	704	724	-	3.69e-07
BnOLEO2-A07	BnaA07g14960D	BnaC02g30930D	AP2/ERF	704	724	+	1.97e-07
BnOLEO2-A07	BnaA07g14960D	BnaC07g29370D	AP2/ERF	705	725	-	5.71e-08
BnOLEO2-A07	BnaA07g14960D	BnaA04g29310D	AP2/ERF	705	725	+	6.22e-08
BnOLEO2-A07	BnaA07g14960D	BnaA06g27670D	AP2/ERF	705	725	-	5.71e-08
BnOLEO2-A07	BnaA07g14960D	BnaA03g40380D	AP2/ERF	705	723	-	8.13e-07
BnOLEO2-A07	BnaA07g14960D	BnaA06g24080D	AP2/ERF	707	721	-	7.03e-07
BnOLEO2-A07	BnaA07g14960D	BnaC06g00880D	AP2/ERF	707	721	-	7.5e-07
BnOLEO2-A07	BnaA07g14960D	BnaA02g22560D	AP2/ERF	707	727	+	9.05e-07
BnOLEO2-A07	BnaA07g14960D	BnaA02g15420D	AP2/ERF	707	726	-	1.96e-07
BnOLEO2-A07	BnaA07g14960D	BnaC02g30930D	AP2/ERF	707	727	+	9.05e-07
BnOLEO2-A07	BnaA07g14960D	BnaA01g34910D	AP2/ERF	710	730	-	4.81e-07
BnOLEO2-A07	BnaA07g14960D	BnaC03g43410D	GATA	700	714	+	2.9e-07
BnOLEO2-A07	BnaA07g14960D	BnaA02g12180D	LBD	701	721	-	1.8e-07
BnOLEO2-A07	BnaA07g14960D	BnaA06g24080D	AP2/ERF	701	715	-	5.92e-08
BnOLEO2-A07	BnaA07g14960D	BnaA07g12040D	AP2/ERF	701	715	-	2.88e-07
BnOLEO2-A07	BnaA07g14960D	BnaCnng60520D	AP2/ERF	701	721	-	8.78e-08
BnOLEO2-A07	BnaA07g14960D	BnaA02g15420D	AP2/ERF	701	720	-	1.04e-08
BnOLEO2-A07	BnaA07g14960D	BnaA07g21680D	AP2/ERF	701	715	-	2.98e-08
BnOLEO2-A07	BnaA07g14960D	BnaA02g32120D	AP2/ERF	701	719	+	1.74e-07
BnOLEO2-A07	BnaA07g14960D	BnaC09g20100D	AP2/ERF	701	715	-	6.81e-07
BnOLEO2-A07	BnaA07g14960D	BnaAnng03730D	AP2/ERF	701	715	-	7.94e-08
BnOLEO2-A07	BnaA07g14960D	BnaC06g00880D	AP2/ERF	701	715	-	4.85e-08
BnOLEO2-A07	BnaA07g14960D	BnaCnng14500D	LBD	701	721	-	1.8e-07
BnOLEO2-A07	BnaA07g14960D	BnaAnng28960D	AP2/ERF	702	721	-	4.9e-11
BnOLEO2-A07	BnaA07g14960D	BnaAnng31240D	LBD	702	722	-	1.21e-08
BnOLEO2-A07	BnaA07g14960D	BnaC04g55440D	AP2/ERF	702	712	-	5.09e-08
BnOLEO2-A07	BnaA07g14960D	BnaA07g24230D	Dof	416	442	-	5.29e-07
BnOLEO2-A07	BnaA07g14960D	BnaA07g12230D	Dof	418	446	-	1.2e-07
BnOLEO2-A07	BnaA07g14960D	BnaA08g01830D	Dof	425	445	+	3.7e-07
BnOLEO2-A07	BnaA07g14960D	BnaC01g42310D	Dof	425	445	-	3.51e-07
BnOLEO2-A07	BnaA07g14960D	BnaA02g03590D	AP2/ERF	427	446	+	5.83e-07
BnOLEO2-A07	BnaA07g14960D	BnaC05g42130D	AP2/ERF	695	715	+	2.33e-08
BnOLEO2-A07	BnaA07g14960D	BnaC07g29370D	AP2/ERF	696	716	-	7.71e-07
BnOLEO2-A07	BnaA07g14960D	BnaA06g27670D	AP2/ERF	696	716	-	7.71e-07
BnOLEO2-A07	BnaA07g14960D	BnaCnng60520D	AP2/ERF	698	718	-	8.88e-08
BnOLEO2-A07	BnaA07g14960D	BnaA08g13940D	AP2/ERF	698	718	-	2.18e-07
BnOLEO2-A07	BnaA07g14960D	BnaA02g15420D	AP2/ERF	698	717	-	3.94e-08
BnOLEO2-A07	BnaA07g14960D	BnaA06g24080D	AP2/ERF	698	712	-	5.04e-07
BnOLEO2-A07	BnaA07g14960D	BnaC07g08360D	AP2/ERF	698	712	+	5.04e-07
BnOLEO2-A07	BnaA07g14960D	BnaC04g53380D	AP2/ERF	698	714	-	2.07e-07
BnOLEO2-A07	BnaA07g14960D	BnaC02g30930D	AP2/ERF	698	718	+	5.15e-07
BnOLEO2-A07	BnaA07g14960D	BnaA09g27300D	AP2/ERF	698	712	-	9.09e-07
BnOLEO2-A07	BnaA07g14960D	BnaC09g20100D	AP2/ERF	698	712	-	2.71e-07
BnOLEO2-A07	BnaA07g14960D	BnaA02g22560D	AP2/ERF	698	718	+	5.15e-07
BnOLEO2-A07	BnaA07g14960D	BnaA03g04570D	AP2/ERF	699	719	-	6.67e-07
BnOLEO2-A07	BnaA07g14960D	BnaAnng31240D	LBD	699	719	-	1.27e-07
BnOLEO2-A07	BnaA07g14960D	BnaC07g29370D	AP2/ERF	699	719	-	1.77e-08
BnOLEO2-A07	BnaA07g14960D	BnaA03g40380D	AP2/ERF	699	717	-	3.45e-07
BnOLEO2-A07	BnaA07g14960D	BnaA07g10270D	AP2/ERF	699	713	+	7.2e-07
BnOLEO2-A07	BnaA07g14960D	BnaCnng60770D	LBD	699	719	-	1.27e-07
BnOLEO2-A07	BnaA07g14960D	BnaA06g27670D	AP2/ERF	699	719	-	1.77e-08
BnOLEO2-A07	BnaA07g14960D	BnaC09g39350D	AP2/ERF	699	713	+	9.88e-07
BnOLEO2-A07	BnaA07g14960D	BnaCnng60770D	LBD	711	731	-	7.33e-07
BnOLEO2-A07	BnaA07g14960D	BnaC07g29370D	AP2/ERF	711	731	-	4.71e-07
BnOLEO2-A07	BnaA07g14960D	BnaA06g27670D	AP2/ERF	711	731	-	4.71e-07
BnOLEO2-A07	BnaA07g14960D	BnaAnng31240D	LBD	711	731	-	7.33e-07
BnOLEO2-A07	BnaA07g14960D	BnaA04g29310D	AP2/ERF	711	731	+	1.46e-07
BnOLEO2-A07	BnaA07g14960D	BnaCnng60520D	AP2/ERF	713	733	-	1.68e-07
BnOLEO2-A07	BnaA07g14960D	BnaCnng60770D	LBD	714	734	-	3.12e-07
BnOLEO2-A07	BnaA07g14960D	BnaA03g40380D	AP2/ERF	714	732	-	6.45e-07
BnOLEO2-A07	BnaA07g14960D	BnaAnng31240D	LBD	714	734	-	3.12e-07
BnOLEO2-A07	BnaA07g14960D	BnaA08g13940D	AP2/ERF	716	736	-	5.64e-07
BnOLEO2-A07	BnaA07g14960D	BnaA02g15420D	AP2/ERF	716	735	-	1.73e-07
BnOLEO2-A07	BnaA07g14960D	BnaA02g12180D	LBD	716	736	-	6.74e-07
BnOLEO2-A07	BnaA07g14960D	BnaCnng14500D	LBD	716	736	-	6.74e-07
BnOLEO2-A07	BnaA07g14960D	BnaC07g29370D	AP2/ERF	717	737	-	1.21e-07
BnOLEO2-A07	BnaA07g14960D	BnaA08g13860D	AP2/ERF	717	736	+	4.95e-07
BnOLEO2-A07	BnaA07g14960D	BnaA06g27670D	AP2/ERF	717	737	-	1.21e-07
BnOLEO2-A07	BnaA07g14960D	BnaA06g27670D	AP2/ERF	723	743	-	2.81e-07
BnOLEO2-A07	BnaA07g14960D	BnaA04g29310D	AP2/ERF	723	743	+	3.29e-07
BnOLEO2-A07	BnaA07g14960D	BnaC07g29370D	AP2/ERF	723	743	-	2.81e-07
BnOLEO2-A07	BnaA07g14960D	BnaA02g15420D	AP2/ERF	725	744	-	4.62e-07
BnOLEO2-A07	BnaA07g14960D	BnaC07g29370D	AP2/ERF	732	752	-	9.94e-07
BnOLEO2-A07	BnaA07g14960D	BnaA06g27670D	AP2/ERF	732	752	-	9.94e-07
BnOLEO2-A07	BnaA07g14960D	BnaC07g29370D	AP2/ERF	735	755	-	8.2e-08
BnOLEO2-A07	BnaA07g14960D	BnaA06g27670D	AP2/ERF	735	755	-	8.2e-08
BnOLEO2-A07	BnaA07g14960D	BnaA07g12230D	Dof	1359	1387	-	2.21e-07
BnOLEO2-A07	BnaA07g14960D	BnaA09g34950D	Dof	1362	1382	-	5.86e-07
BnOLEO2-A07	BnaA07g14960D	BnaC09g05850D	Dof	1364	1384	+	5.52e-07
BnOLEO2-A07	BnaA07g14960D	BnaAnng00370D	Dof	1365	1385	+	3.89e-07
BnOLEO2-A07	BnaA07g14960D	BnaA04g16710D	Dof	1365	1385	-	2.79e-07
BnOLEO2-A07	BnaA07g14960D	BnaC01g01040D	Dof	1365	1392	-	5.31e-07
BnOLEO2-A07	BnaA07g14960D	BnaC01g42310D	Dof	1366	1386	-	3.87e-07
BnOLEO2-A07	BnaA07g14960D	BnaA07g24230D	Dof	1805	1831	-	5.29e-07
BnOLEO2-A07	BnaA07g14960D	BnaA07g12230D	Dof	1807	1835	-	1.2e-07
BnOLEO2-A07	BnaA07g14960D	BnaA08g01830D	Dof	1814	1834	+	3.7e-07
BnOLEO2-A07	BnaA07g14960D	BnaC01g42310D	Dof	1814	1834	-	3.51e-07
BnOLEO2-A07	BnaA07g14960D	BnaA02g03590D	AP2/ERF	1816	1835	+	5.83e-07
BnOLEO7-A03	BnaA03g27410D	BnaC07g47530D	BBR-BPC	1124	1153	-	6.79e-07
BnOLEO7-A03	BnaA03g27410D	BnaC06g42740D	BBR-BPC	1124	1144	+	5.9e-10
BnOLEO7-A03	BnaA03g27410D	BnaA03g56880D	MIKC_MADS	1125	1145	+	7.02e-08
BnOLEO7-A03	BnaA03g27410D	BnaC07g47530D	BBR-BPC	1126	1155	-	1.32e-07
BnOLEO7-A03	BnaA03g27410D	BnaC01g01040D	Dof	979	1006	-	7.52e-07
BnOLEO7-A03	BnaA03g27410D	BnaC07g47530D	BBR-BPC	1110	1139	-	4.19e-07
BnOLEO7-A03	BnaA03g27410D	BnaC07g47530D	BBR-BPC	1112	1141	-	7.67e-07
BnOLEO7-A03	BnaA03g27410D	BnaC07g47530D	BBR-BPC	1114	1143	-	1.9e-07
BnOLEO7-A03	BnaA03g27410D	BnaC07g47530D	BBR-BPC	1116	1145	-	3.99e-09
BnOLEO7-A03	BnaA03g27410D	BnaC07g47530D	BBR-BPC	1118	1147	-	5.05e-07
BnOLEO7-A03	BnaA03g27410D	BnaC07g47530D	BBR-BPC	1120	1149	-	1.23e-07
BnOLEO7-A03	BnaA03g27410D	BnaC06g42740D	BBR-BPC	1122	1142	+	1.72e-08
BnOLEO7-A03	BnaA03g27410D	BnaC07g47530D	BBR-BPC	1122	1151	-	1.75e-07
BnOLEO7-A03	BnaA03g27410D	BnaC07g47530D	BBR-BPC	1820	1849	-	3.62e-07
BnOLEO7-A03	BnaA03g27410D	BnaC06g42740D	BBR-BPC	1128	1148	+	4.37e-10
BnOLEO7-A03	BnaA03g27410D	BnaC06g42740D	BBR-BPC	1130	1150	+	4.32e-10
BnOLEO7-A03	BnaA03g27410D	BnaA03g56880D	MIKC_MADS	1131	1151	+	4.75e-07
BnOLEO7-A03	BnaA03g27410D	BnaC06g42740D	BBR-BPC	1126	1146	+	6.75e-12
BnOLEO7-A03	BnaA03g27410D	BnaC06g42740D	BBR-BPC	1132	1152	+	1.57e-07
BnOLEO7-A03	BnaA03g27410D	BnaC03g77870D	GATA	1437	1455	-	6.17e-07
BnOLEO7-A03	BnaA03g27410D	BnaC07g20900D	GRAS	1444	1463	+	1.96e-07
BnOLEO7-A03	BnaA03g27410D	BnaA02g03590D	AP2/ERF	1131	1150	-	4.99e-08
BnOLEO7-A03	BnaA03g27410D	BnaC08g18770D	BES1	1527	1537	-	2.67e-07
BnOLEO7-C03	BnaC03g32430D	BnaC01g01040D	Dof	1362	1389	+	4.85e-08
BnOLEO7-C03	BnaC03g32430D	BnaC07g47530D	BBR-BPC	1804	1833	-	3.58e-07
BnOLEO7-C03	BnaC03g32430D	BnaA03g56880D	MIKC_MADS	1809	1829	+	2.19e-07
BnOLEO7-C03	BnaC03g32430D	BnaC01g01040D	Dof	1354	1381	+	3.4e-08
BnOLEO7-C03	BnaC03g32430D	BnaA07g23270D	C2H2	454	472	-	9.49e-07
BnOLEO7-C03	BnaC03g32430D	BnaC07g47530D	BBR-BPC	583	612	-	8.05e-08
BnOLEO7-C03	BnaC03g32430D	BnaC07g47530D	BBR-BPC	587	616	-	3.27e-07
BnOLEO7-C03	BnaC03g32430D	BnaC06g42740D	BBR-BPC	589	609	+	9.62e-07
BnOLEO7-C03	BnaC03g32430D	BnaC06g42740D	BBR-BPC	593	613	+	3.69e-09
BnOLEO7-C03	BnaC03g32430D	BnaC06g42740D	BBR-BPC	595	615	+	5.21e-09
BnOLEO7-C03	BnaC03g32430D	BnaA03g56880D	MIKC_MADS	596	616	+	2.47e-07
BnOLEO7-C03	BnaC03g32430D	BnaC06g42740D	BBR-BPC	597	617	+	3.17e-08
BnOLEO7-C03	BnaC03g32430D	BnaC06g42740D	BBR-BPC	599	619	+	6.4e-08
BnOLEO7-C03	BnaC03g32430D	BnaA02g03590D	AP2/ERF	600	619	-	5.13e-07
BnOLEO7-C03	BnaC03g32430D	BnaC07g20900D	GRAS	892	911	+	1.96e-07
BnOLEO7-C03	BnaC03g32430D	BnaC08g18770D	BES1	985	995	-	5.36e-08
BnOLEO7-C03	BnaC03g32430D	BnaC01g01040D	Dof	1348	1375	+	9.38e-07
BnOLEO6-A04	BnaA04g15210D	BnaC09g36070D	C2H2	863	877	-	9.64e-07
BnOLEO6-A04	BnaA04g15210D	BnaC03g77870D	GATA	870	888	-	6.36e-07
BnOLEO6-A04	BnaA04g15210D	BnaA09g34950D	Dof	1979	1999	-	3.13e-07
BnOLEO6-C04	BnaC04g38160D	BnaC03g77870D	GATA	756	774	-	9.37e-07
BnOLEO6-C04	BnaC04g38160D	BnaC05g07950D	bHLH	1778	1798	+	9.99e-08
BnOLEO6-C04	BnaC04g38160D	BnaC08g18770D	BES1	1783	1793	+	6.08e-07
BnOLEO6-C04	BnaC04g38160D	BnaA03g43770D	BES1	1783	1793	+	2.94e-07
BnOLEO6-C04	BnaC04g38160D	BnaA07g34330D	BES1	1783	1793	+	9.99e-07
BnOLEO3-A10	BnaA10g05760D	BnaC01g01040D	Dof	324	351	+	5.64e-07
BnOLEO3-A10	BnaA10g05760D	BnaA07g12230D	Dof	329	357	+	1.81e-07
BnOLEO3-A10	BnaA10g05760D	BnaA04g16710D	Dof	331	351	+	1.83e-07
BnOLEO3-A10	BnaA10g05760D	BnaAnng00370D	Dof	331	351	-	4.56e-08
BnOLEO3-A10	BnaA10g05760D	BnaCnng36180D	MIKC_MADS	338	351	-	6.78e-07
BnOLEO3-A10	BnaA10g05760D	BnaA03g08030D	MIKC_MADS	338	351	-	6.78e-07
BnOLEO3-C09	BnaC09g27370D	BnaC01g42310D	Dof	643	663	+	2.88e-07
BnOLEO1-A03	BnaA03g47170D	BnaA02g22560D	AP2/ERF	1023	1043	+	8.21e-08
BnOLEO1-A03	BnaA03g47170D	BnaA08g00990D	AP2/ERF	1023	1043	+	1.52e-07
BnOLEO1-A03	BnaA03g47170D	BnaC02g30930D	AP2/ERF	1023	1043	+	8.21e-08
BnOLEO1-A03	BnaA03g47170D	BnaA03g04570D	AP2/ERF	1024	1044	-	5.72e-07
BnOLEO1-A03	BnaA03g47170D	BnaC09g06610D	AP2/ERF	1024	1042	+	2.82e-07
BnOLEO1-A03	BnaA03g47170D	BnaA06g23710D	AP2/ERF	1024	1042	+	2.82e-07
BnOLEO1-A03	BnaA03g47170D	BnaA03g02000D	AP2/ERF	1026	1040	-	1.35e-08
BnOLEO1-A03	BnaA03g47170D	BnaA02g32120D	AP2/ERF	1026	1044	+	1.08e-07
BnOLEO1-A03	BnaA03g47170D	BnaA07g23090D	AP2/ERF	1026	1046	-	9.94e-08
BnOLEO1-A03	BnaA03g47170D	BnaA08g11220D	AP2/ERF	1028	1042	+	7.4e-07
BnOLEO1-A03	BnaA03g47170D	BnaA03g52830D	AP2/ERF	1028	1042	+	7.4e-07
BnOLEO1-A03	BnaA03g47170D	BnaC03g39000D	AP2/ERF	1029	1043	-	9.95e-07
BnOLEO1-A03	BnaA03g47170D	BnaC06g42740D	BBR-BPC	1194	1214	-	3.46e-07
BnOLEO1-A03	BnaA03g47170D	BnaC02g30930D	AP2/ERF	1200	1220	+	8.81e-07
BnOLEO1-A03	BnaA03g47170D	BnaA02g22560D	AP2/ERF	1200	1220	+	8.81e-07
BnOLEO1-A03	BnaA03g47170D	BnaA06g23710D	AP2/ERF	1201	1219	+	4.73e-07
BnOLEO1-A03	BnaA03g47170D	BnaC09g06610D	AP2/ERF	1201	1219	+	4.73e-07
BnOLEO1-A03	BnaA03g47170D	BnaA03g04570D	AP2/ERF	1201	1221	-	2.8e-07
BnOLEO1-A03	BnaA03g47170D	BnaA02g32120D	AP2/ERF	1203	1221	+	3.73e-07
BnOLEO1-C07	BnaC07g39370D	BnaC06g42740D	BBR-BPC	760	780	-	3.46e-07
BnOLEO1-C07	BnaC07g39370D	BnaA02g22560D	AP2/ERF	766	786	+	8.81e-07
BnOLEO1-C07	BnaC07g39370D	BnaC02g30930D	AP2/ERF	766	786	+	8.81e-07
BnOLEO1-C07	BnaC07g39370D	BnaC09g06610D	AP2/ERF	767	785	+	4.73e-07
BnOLEO1-C07	BnaC07g39370D	BnaA03g04570D	AP2/ERF	767	787	-	2.8e-07
BnOLEO1-C07	BnaC07g39370D	BnaA06g23710D	AP2/ERF	767	785	+	4.73e-07
BnOLEO1-C07	BnaC07g39370D	BnaA02g32120D	AP2/ERF	769	787	+	3.73e-07
BnOLEO1-C08	BnaC08g11970D	BnaA03g30340D	MYB	224	234	-	1.84e-07
BnOLEO1-C08	BnaC08g11970D	BnaC08g38370D	MYB	944	958	-	7.92e-07
BnOLEO1-C08	BnaC08g11970D	BnaA07g23270D	C2H2	1202	1220	+	7.32e-07
BnOLEO1-C08	BnaC08g11970D	BnaA02g12180D	LBD	1308	1328	-	9.72e-08
BnOLEO1-C08	BnaC08g11970D	BnaC02g30930D	AP2/ERF	1308	1328	+	9.38e-07
BnOLEO1-C08	BnaC08g11970D	BnaCnng14500D	LBD	1308	1328	-	9.72e-08
BnOLEO1-C08	BnaC08g11970D	BnaA02g22560D	AP2/ERF	1308	1328	+	9.38e-07
BnOLEO1-C08	BnaC08g11970D	BnaC09g06610D	AP2/ERF	1309	1327	+	8.49e-07
BnOLEO1-C08	BnaC08g11970D	BnaA06g23710D	AP2/ERF	1309	1327	+	8.49e-07
BnOLEO1-C08	BnaC08g11970D	BnaA06g24080D	AP2/ERF	1527	1541	-	5.25e-07
BnOLEO1-A08	BnaA08g14540D	BnaA02g15710D	TCP	8	20	+	1.84e-07
BnOLEO1-A08	BnaA08g14540D	BnaC06g27940D	TCP	8	20	+	4.11e-07
BnOLEO1-A08	BnaA08g14540D	BnaC04g04400D	TCP	9	29	-	3.11e-08
BnOLEO1-A08	BnaA08g14540D	BnaC09g47560D	TCP	9	22	+	4.66e-07
BnOLEO1-A08	BnaA08g14540D	BnaA06g26010D	TCP	10	20	+	2.21e-07
BnOLEO1-A08	BnaA08g14540D	BnaA02g12180D	LBD	121	141	+	3.23e-07
BnOLEO1-A08	BnaA08g14540D	BnaCnng14500D	LBD	121	141	+	3.23e-07
BnOLEO1-A08	BnaA08g14540D	BnaA05g01260D	Dof	503	513	+	6.56e-07
BnOLEO1-A08	BnaA08g14540D	BnaC07g47530D	BBR-BPC	681	710	-	4.8e-07
BnOLEO1-A08	BnaA08g14540D	BnaC07g47530D	BBR-BPC	683	712	-	8.78e-08
BnOLEO1-A08	BnaA08g14540D	BnaC07g47530D	BBR-BPC	685	714	-	1.27e-07
BnOLEO1-A08	BnaA08g14540D	BnaC06g42740D	BBR-BPC	687	707	+	6.25e-08
BnOLEO1-A08	BnaA08g14540D	BnaC07g47530D	BBR-BPC	689	718	-	7.31e-07
BnOLEO1-A08	BnaA08g14540D	BnaC06g42740D	BBR-BPC	689	709	+	1.13e-08
BnOLEO1-A08	BnaA08g14540D	BnaC06g42740D	BBR-BPC	691	711	+	2.92e-09
BnOLEO1-A08	BnaA08g14540D	BnaC07g47530D	BBR-BPC	691	720	-	7.8e-08
BnOLEO1-A08	BnaA08g14540D	BnaC06g42740D	BBR-BPC	693	713	+	6.28e-09
BnOLEO1-A08	BnaA08g14540D	BnaC07g47530D	BBR-BPC	693	722	-	7.88e-07
BnOLEO1-A08	BnaA08g14540D	BnaA03g56880D	MIKC_MADS	694	714	+	9.96e-07
BnOLEO1-A08	BnaA08g14540D	BnaC06g42740D	BBR-BPC	695	715	+	5.63e-07
BnOLEO1-A08	BnaA08g14540D	BnaA08g02650D	B3	1086	1100	-	8.04e-07
BnOLEO1-A08	BnaA08g14540D	BnaA07g23270D	C2H2	1509	1527	+	7.32e-07
BnOLEO1-A08	BnaA08g14540D	BnaA01g37250D	C2H2	1780	1800	-	9.04e-07
BnOLEO1-A01	BnaA01g14480D	BnaA02g20420D	B3	387	402	-	4.47e-07
BnOLEO1-A01	BnaA01g14480D	BnaC06g12700D	NAC	1251	1268	+	4.76e-08
BnOLEO1-A01	BnaA01g14480D	BnaC05g21870D	NAC	1254	1268	-	2.86e-07
BnOLEO1-A01	BnaA01g14480D	BnaA01g08370D	NAC	1254	1268	+	2.88e-07
BnOLEO1-A01	BnaA01g14480D	BnaA03g49460D	NAC	1254	1268	-	2.47e-07
BnOLEO1-A01	BnaA01g14480D	BnaA02g22560D	AP2/ERF	1364	1384	+	8.26e-07
BnOLEO1-A01	BnaA01g14480D	BnaA08g00990D	AP2/ERF	1364	1384	+	4.5e-07
BnOLEO1-A01	BnaA01g14480D	BnaC02g30930D	AP2/ERF	1364	1384	+	8.26e-07
BnOLEO1-A01	BnaA01g14480D	BnaA02g32120D	AP2/ERF	1367	1385	+	4.94e-07
BnOLEO1-A01	BnaA01g14480D	BnaA03g02000D	AP2/ERF	1367	1381	-	3.97e-07
BnOLEO1-A01	BnaA01g14480D	BnaA07g23090D	AP2/ERF	1367	1387	-	1.7e-07
BnOLEO1-A01	BnaA01g14480D	BnaA03g52830D	AP2/ERF	1369	1383	+	3.89e-07
BnOLEO1-A01	BnaA01g14480D	BnaA08g11220D	AP2/ERF	1369	1383	+	3.89e-07
BnOLEO1-A01	BnaA01g14480D	BnaC03g39000D	AP2/ERF	1370	1384	-	7.61e-07
BnOLEO1-A01	BnaA01g14480D	BnaA07g24590D	AP2/ERF	1373	1387	-	8.85e-07
BnOLEO1-A01	BnaA01g14480D	BnaC09g06610D	AP2/ERF	1548	1566	+	9.87e-07
BnOLEO1-A01	BnaA01g14480D	BnaA06g23710D	AP2/ERF	1548	1566	+	9.87e-07
BnOLEO1-A01	BnaA01g14480D	BnaA03g04570D	AP2/ERF	1548	1568	-	5.89e-07
BnOLEO1-A01	BnaA01g14480D	BnaC09g06280D	CAMTA	1556	1564	-	6.25e-07
BnOLEO1-A01	BnaA01g14480D	BnaC07g47530D	BBR-BPC	1880	1909	-	1.89e-08
BnOLEO1-C01	BnaC01g17050D	BnaA10g10250D	MYB	178	192	-	1.61e-07
BnOLEO1-C01	BnaC01g17050D	BnaAnng13560D	MYB	178	191	-	2.95e-07
BnOLEO1-C01	BnaC01g17050D	BnaC08g18470D	MYB_related	783	804	+	3.64e-08
BnOLEO1-C01	BnaC01g17050D	BnaC06g12700D	NAC	1262	1279	+	4.76e-08
BnOLEO1-C01	BnaC01g17050D	BnaC05g21870D	NAC	1265	1279	-	2.86e-07
BnOLEO1-C01	BnaC01g17050D	BnaA03g49460D	NAC	1265	1279	-	2.47e-07
BnOLEO1-C01	BnaC01g17050D	BnaA01g08370D	NAC	1265	1279	+	2.88e-07
BnOLEO1-C01	BnaC01g17050D	BnaA02g32120D	AP2/ERF	1378	1396	+	6.71e-07
BnOLEO1-C01	BnaC01g17050D	BnaA07g23090D	AP2/ERF	1378	1398	-	2.76e-07
BnOLEO1-C01	BnaC01g17050D	BnaA03g02000D	AP2/ERF	1378	1392	-	8.83e-07
BnOLEO1-C01	BnaC01g17050D	BnaA07g24590D	AP2/ERF	1384	1398	-	8.13e-07
BnOLEO1-C01	BnaC01g17050D	BnaA03g04570D	AP2/ERF	1559	1579	-	5.89e-07
BnOLEO1-C01	BnaC01g17050D	BnaA06g23710D	AP2/ERF	1559	1577	+	9.87e-07
BnOLEO1-C01	BnaC01g17050D	BnaC09g06610D	AP2/ERF	1559	1577	+	9.87e-07
BnOLEO1-C01	BnaC01g17050D	BnaC09g06280D	CAMTA	1567	1575	-	6.25e-07
BnOLEO1-C01	BnaC01g17050D	BnaA08g00990D	AP2/ERF	1863	1883	-	8.78e-07
BnOLEO1-C01	BnaC01g17050D	BnaC07g47530D	BBR-BPC	1882	1911	-	1.89e-08
BnOLEO5-A06	BnaA06g03370D	BnaC07g29370D	AP2/ERF	117	137	+	5.19e-07
BnOLEO5-A06	BnaA06g03370D	BnaA04g29310D	AP2/ERF	117	137	-	5.93e-07
BnOLEO5-A06	BnaA06g03370D	BnaA06g27670D	AP2/ERF	117	137	+	5.19e-07
BnOLEO5-A06	BnaA06g03370D	BnaA02g15420D	AP2/ERF	119	138	+	4.05e-07
BnOLEO5-A06	BnaA06g03370D	BnaC07g29370D	AP2/ERF	120	140	+	2.93e-08
BnOLEO5-A06	BnaA06g03370D	BnaA06g27670D	AP2/ERF	120	140	+	2.93e-08
BnOLEO5-A06	BnaA06g03370D	BnaA04g29310D	AP2/ERF	120	140	-	1.27e-07
BnOLEO5-A06	BnaA06g03370D	BnaCnng60770D	LBD	120	140	+	6.53e-08
BnOLEO5-A06	BnaA06g03370D	BnaAnng31240D	LBD	120	140	+	6.53e-08
BnOLEO5-A06	BnaA06g03370D	BnaC02g30930D	AP2/ERF	121	141	-	4.64e-07
BnOLEO5-A06	BnaA06g03370D	BnaA02g22560D	AP2/ERF	121	141	-	4.64e-07
BnOLEO5-A06	BnaA06g03370D	BnaA08g13860D	AP2/ERF	121	140	-	2.56e-07
BnOLEO5-A06	BnaA06g03370D	BnaA02g15420D	AP2/ERF	122	141	+	2.99e-08
BnOLEO5-A06	BnaA06g03370D	BnaAnng31240D	LBD	123	143	+	6.94e-07
BnOLEO5-A06	BnaA06g03370D	BnaCnng60770D	LBD	123	143	+	6.94e-07
BnOLEO5-A06	BnaA06g03370D	BnaCnng60520D	AP2/ERF	124	144	+	1.99e-07
BnOLEO5-A06	BnaA06g03370D	BnaC02g08170D	AP2/ERF	130	144	+	8.07e-07
BnOLEO5-A06	BnaA06g03370D	BnaA07g31600D	Nin-like	538	556	-	2e-07
BnOLEO5-A06	BnaA06g03370D	BnaC07g08370D	bHLH	780	802	-	7.35e-07
BnOLEO5-A06	BnaA06g03370D	BnaC07g08370D	bHLH	781	803	+	2.79e-07
BnOLEO5-A06	BnaA06g03370D	BnaA05g08020D	bZIP	782	799	+	7.33e-07
BnOLEO5-A06	BnaA06g03370D	BnaC07g00780D	bHLH	782	795	+	8.73e-07
BnOLEO5-A06	BnaA06g03370D	BnaC08g27660D	bZIP	783	797	+	2.74e-07
BnOLEO5-A06	BnaA06g03370D	BnaC06g00420D	bZIP	785	802	-	1.82e-07
BnOLEO5-A06	BnaA06g03370D	BnaA08g28740D	bZIP	816	829	-	9.19e-07
BnOLEO5-A06	BnaA06g03370D	BnaA03g40080D	bHLH	1675	1689	-	8.9e-07
BnOLEO5-CO6	BnaC06g02430D	BnaCnng09530D	C2H2	155	166	+	1.16e-07
BnOLEO5-CO6	BnaC06g02430D	BnaCnng60520D	AP2/ERF	438	458	+	8.59e-07
BnOLEO5-CO6	BnaC06g02430D	BnaAnng28960D	AP2/ERF	438	457	+	5.39e-07
BnOLEO5-CO6	BnaC06g02430D	BnaA08g13860D	AP2/ERF	438	457	-	3.8e-08
BnOLEO5-CO6	BnaC06g02430D	BnaA02g15420D	AP2/ERF	439	458	+	5.04e-08
BnOLEO5-CO6	BnaC06g02430D	BnaCnng60520D	AP2/ERF	441	461	+	2.59e-08
BnOLEO5-CO6	BnaC06g02430D	BnaA03g40380D	AP2/ERF	442	460	+	1.07e-07
BnOLEO5-CO6	BnaC06g02430D	BnaA06g24080D	AP2/ERF	444	458	+	2.76e-07
BnOLEO5-CO6	BnaC06g02430D	BnaA01g23940D	AP2/ERF	444	471	+	3.82e-07
BnOLEO5-CO6	BnaC06g02430D	BnaA07g23090D	AP2/ERF	444	464	+	5.75e-07
BnOLEO5-CO6	BnaC06g02430D	BnaA05g09970D	AP2/ERF	444	458	+	4.99e-07
BnOLEO5-CO6	BnaC06g02430D	BnaA01g34910D	AP2/ERF	444	464	+	2.78e-07
BnOLEO5-CO6	BnaC06g02430D	BnaA07g24590D	AP2/ERF	444	458	+	2.81e-07
BnOLEO5-CO6	BnaC06g02430D	BnaC09g20100D	AP2/ERF	444	458	+	6.31e-07
BnOLEO5-CO6	BnaC06g02430D	BnaC09g37870D	AP2/ERF	444	458	+	3.56e-07
BnOLEO5-CO6	BnaC06g02430D	BnaC06g03860D	AP2/ERF	444	458	-	4.99e-07
BnOLEO5-CO6	BnaC06g02430D	BnaC07g10670D	AP2/ERF	444	458	-	3.21e-07
BnOLEO5-CO6	BnaC06g02430D	BnaA09g27300D	AP2/ERF	444	458	+	5.04e-07
BnOLEO5-CO6	BnaC06g02430D	BnaA07g21680D	AP2/ERF	444	458	+	2e-07
BnOLEO5-CO6	BnaC06g02430D	BnaC02g08170D	AP2/ERF	444	458	+	2.85e-07
BnOLEO5-CO6	BnaC06g02430D	BnaAnng40920D	AP2/ERF	445	459	+	1.31e-07
BnOLEO5-CO6	BnaC06g02430D	BnaC07g08360D	AP2/ERF	447	461	-	3.88e-07
BnOLEO5-CO6	BnaC06g02430D	BnaA08g13940D	AP2/ERF	447	467	+	3.19e-07
BnOLEO5-CO6	BnaC06g02430D	BnaC04g55440D	AP2/ERF	447	457	+	7.13e-07
BnOLEO5-CO6	BnaC06g02430D	BnaC03g39000D	AP2/ERF	447	461	+	8.81e-07
BnOLEO5-CO6	BnaC06g02430D	BnaC09g17590D	AP2/ERF	450	459	+	9.98e-07
BnOLEO5-CO6	BnaC06g02430D	BnaA01g13420D	AP2/ERF	450	457	+	9.68e-07
BnOLEO5-CO6	BnaC06g02430D	BnaA03g40080D	bHLH	1683	1697	-	5.68e-07
BnOLEO5-C08	BnaC08g03140D	BnaC07g00810D	CPP	161	175	+	6.79e-07
BnOLEO5-C08	BnaC08g03140D	BnaA03g13630D	MIKC_MADS	909	929	-	7.37e-07
BnOLEO5-C08	BnaC08g03140D	BnaA05g05000D	MIKC_MADS	909	927	-	9.76e-07
BnOLEO5-C08	BnaC08g03140D	BnaA04g00890D	MIKC_MADS	910	927	-	2.13e-07
BnOLEO5-C08	BnaC08g03140D	BnaA03g05650D	MIKC_MADS	911	928	-	3.99e-07
BnOLEO5-C08	BnaC08g03140D	BnaA10g18480D	MIKC_MADS	911	928	-	3.99e-07
BnOLEO5-C08	BnaC08g03140D	BnaA01g37250D	C2H2	1811	1831	-	7.3e-07
BnOLEO5-C08	BnaC08g03140D	BnaA07g23270D	C2H2	1960	1978	+	5.35e-07
BnOLEO8-C01	BnaC01g34070D	BnaC07g29370D	AP2/ERF	821	841	+	9.38e-07
BnOLEO8-C01	BnaC01g34070D	BnaA06g27670D	AP2/ERF	821	841	+	9.38e-07
BnOLEO8-C01	BnaC01g34070D	BnaC05g09890D	Trihelix	1251	1269	-	9.35e-07
BnOLEO8-C01	BnaC01g34070D	BnaC04g07080D	G2-like	1539	1549	+	6.56e-07
BnOLEO8-C01	BnaC01g34070D	BnaA03g56880D	MIKC_MADS	1581	1601	+	8.76e-07
BnOLEO8-C01	BnaC01g34070D	BnaA10g21200D	bZIP	1961	1975	-	5.26e-07
BnOLEO8-C01	BnaC01g34070D	BnaC07g00300D	G2-like	765	774	-	6.12e-07
BnOLEO8-C01	BnaC01g34070D	BnaC08g18470D	MYB_related	790	811	+	9.39e-07
BnOLEO8-C01	BnaC01g34070D	BnaCnng27630D	CPP	519	533	+	7.11e-07
BnOLEO8-C01	BnaC01g34070D	BnaC07g00810D	CPP	520	534	-	7.89e-07
BnOLEO8-C01	BnaC01g34070D	BnaC08g18470D	MYB_related	793	814	+	2.8e-08
BnOLEO8-A10	BnaA10g05240D	BnaCnng27630D	CPP	519	533	+	7.11e-07
BnOLEO8-A10	BnaA10g05240D	BnaC07g00810D	CPP	520	534	-	7.89e-07
BnOLEO8-A10	BnaA10g05240D	BnaC05g09890D	Trihelix	1251	1269	-	9.35e-07
BnOLEO8-A10	BnaA10g05240D	BnaC04g07080D	G2-like	1539	1549	+	6.56e-07
BnOLEO8-A10	BnaA10g05240D	BnaA03g56880D	MIKC_MADS	1581	1601	+	8.76e-07
BnOLEO8-A10	BnaA10g05240D	BnaA10g21200D	bZIP	1961	1975	-	5.26e-07
BnOLEO8-A10	BnaA10g05240D	BnaC07g00300D	G2-like	765	774	-	6.12e-07
BnOLEO8-A10	BnaA10g05240D	BnaC08g18470D	MYB_related	790	811	+	9.39e-07
BnOLEO8-A10	BnaA10g05240D	BnaC08g18470D	MYB_related	793	814	+	2.8e-08
BnOLEO8-A10	BnaA10g05240D	BnaA06g27670D	AP2/ERF	821	841	+	9.38e-07
BnOLEO8-A10	BnaA10g05240D	BnaC07g29370D	AP2/ERF	821	841	+	9.38e-07
BnOLEO8-A01	BnaA01g26680D	BnaC08g18470D	MYB_related	826	847	+	2.8e-08
BnOLEO8-A01	BnaA01g26680D	BnaA07g18730D	GATA	897	911	+	2.3e-07
BnOLEO8-A01	BnaA01g26680D	BnaC05g09890D	Trihelix	1262	1280	-	9.35e-07
BnOLEO8-A01	BnaA01g26680D	BnaC08g18470D	MYB_related	823	844	+	9.39e-07
BnOLEO8-A01	BnaA01g26680D	BnaA07g11930D	MYB	27	45	-	5.02e-07
BnOLEO8-A01	BnaA01g26680D	BnaAnng27960D	MYB	142	156	+	3.42e-07
BnOLEO8-A01	BnaA01g26680D	BnaC06g33880D	MYB_related	690	704	-	7.65e-07
BnOLEO8-A01	BnaA01g26680D	BnaC07g00300D	G2-like	798	807	-	6.12e-07
BnOLEO8-C05	BnaC05g34600D	BnaA07g31680D	MYB	1019	1033	+	9e-07
BnOLEO8-C05	BnaC05g34600D	BnaCnng62710D	MYB	1019	1036	-	9.55e-07
BnOLEO8-C05	BnaC05g34600D	BnaC07g00300D	G2-like	854	863	-	6.12e-07
BnOLEO8-C05	BnaC05g34600D	BnaC08g18470D	MYB_related	876	897	+	1.32e-07
BnOLEO8-C05	BnaC05g34600D	BnaC08g18470D	MYB_related	879	900	+	1.16e-08
BnOLEO8-A05	BnaA05g21590D	BnaC08g18470D	MYB_related	873	894	+	2.45e-08
BnOLEO8-A05	BnaA05g21590D	BnaC06g33880D	MYB_related	713	727	-	7.65e-07
BnOLEO8-A05	BnaA05g21590D	BnaC07g00300D	G2-like	848	857	-	6.12e-07
BnOLEO8-A05	BnaA05g21590D	BnaC08g18470D	MYB_related	870	891	+	1.73e-07
BnOLEO8-A05	BnaA05g21590D	BnaCnng08620D	AP2/ERF	1390	1404	+	5.37e-07
BnOLEO8-A05	BnaA05g21590D	BnaC08g18470D	MYB_related	876	897	+	2.31e-11
BnOLEO8-A05	BnaA05g21590D	BnaC02g26030D	WRKY	991	1005	+	9.02e-07
BnOLEO8-A05	BnaA05g21590D	BnaA04g28800D	bHLH	1390	1403	+	4.27e-07
BnOLEO8-A05	BnaA05g21590D	BnaA06g27900D	AP2/ERF	1391	1405	-	4.03e-07
BnOLEO8-A05	BnaA05g21590D	BnaC07g29050D	AP2/ERF	1391	1405	-	4.03e-07
BnOLEO8-A05	BnaA05g21590D	BnaC05g37110D	AP2/ERF	1392	1405	+	2.33e-07
BnOLEO8-A05	BnaA05g21590D	BnaA05g04450D	AP2/ERF	1392	1406	+	4.97e-07
BnOLEO8-A05	BnaA05g21590D	BnaC08g04820D	AP2/ERF	1394	1406	+	8.46e-07
BnOLEO8-A05	BnaA05g21590D	BnaA08g04090D	AP2/ERF	1394	1406	+	8.46e-07
BnOLEO8-A05	BnaA05g21590D	BnaA09g38530D	AP2/ERF	1390	1403	+	1.14e-07
BnOLEO8-A05	BnaA05g21590D	BnaA08g12010D	AP2/ERF	1390	1405	-	2.77e-07
BnOLEO8-A05	BnaA05g21590D	BnaA07g33380D	AP2/ERF	1390	1403	-	4.01e-07
BnOLEO8-C03	BnaC03g40520D	BnaC02g30930D	AP2/ERF	1180	1200	-	9.99e-07
BnOLEO8-C03	BnaC03g40520D	BnaCnng62710D	MYB	300	317	-	8.52e-07
BnOLEO8-C03	BnaC03g40520D	BnaA05g06600D	MYB	698	718	+	7.72e-07
BnOLEO8-C03	BnaC03g40520D	BnaA02g22560D	AP2/ERF	1180	1200	-	9.99e-07
BnOLEO8-C03	BnaC03g40520D	BnaCnng36180D	MIKC_MADS	1945	1958	-	6.78e-07
BnOLEO8-C03	BnaC03g40520D	BnaA07g12230D	Dof	1936	1964	+	1.77e-07
BnOLEO8-C03	BnaC03g40520D	BnaA03g08030D	MIKC_MADS	1945	1958	-	6.78e-07
BnOLEO8-A03	BnaA03g34830D	BnaA07g23270D	C2H2	445	463	-	1.17e-07
BnOLEO8-A03	BnaA03g34830D	BnaA10g16730D	B3	442	456	+	2.42e-08
BnOLEO8-A03	BnaA03g34830D	BnaA07g23270D	C2H2	457	475	-	5.09e-07
BnOLEO8-A03	BnaA03g34830D	BnaA07g23270D	C2H2	448	466	-	7.37e-08
BnOLEO8-A03	BnaA03g34830D	BnaA07g23270D	C2H2	451	469	-	1.87e-08
BnOLEO8-A03	BnaA03g34830D	BnaA07g23270D	C2H2	454	472	-	1.07e-08
BnOLEO8-A03	BnaA03g34830D	BnaA09g34950D	Dof	1940	1960	+	4.42e-07
BnOLEO8-A03	BnaA03g34830D	BnaA07g12230D	Dof	1936	1964	+	3.26e-07
BnOLEO8-A03	BnaA03g34830D	BnaA07g24230D	Dof	1938	1964	+	1.85e-07
BnOLEO8-A03	BnaA03g34830D	BnaC09g05850D	Dof	1938	1958	-	6.86e-07
BnOLEO8-A03	BnaA03g34830D	BnaC03g77870D	GATA	439	457	-	9.37e-07
