# Supplementary material for: Transcriptome and Regional Association Analyses Reveal the Effects of Oleosin Genes on the Accumulation of Oil Content in Brassica napus
Source: Plants (Basel). 2022 Nov 16;11(22):3140. doi: 10.3390/plants11223140 (PMC9698637; doi:10.3390/plants11223140)
Supplement: Supplementary file 1 [file plants-11-03140-s001.zip › Table S4.xlsx]

## Sheet: Sheet1
Table S4. Number of transcription factors with potential binding sites in promoter regions of oleosin genes.
Transcription factor gene family	Number of genes
AP2/ERF	62
WRKY	29
bZIP	19
Dof	15
MYB	12
MIKC_MADS	8
NAC	7
B3	5
bHLH	5
C2H2	5
GATA	5
TCP	5
Trihelix	5
BES1	4
LBD	4
MYB_related	3
BBR-BPC	2
CPP	2
G2-like	2
Nin-like	2
ZF-HD	2
ARF	1
CAMTA	1
GRAS	1
WOX	1
