# Supplementary material for: Transcriptome and Regional Association Analyses Reveal the Effects of Oleosin Genes on the Accumulation of Oil Content in Brassica napus
Source: Plants (Basel). 2022 Nov 16;11(22):3140. doi: 10.3390/plants11223140 (PMC9698637; doi:10.3390/plants11223140)
Supplement: Supplementary file 1 [file plants-11-03140-s001.zip › Table S5.xlsx]

## Sheet: Sheet1
Table S5. The average expression levels of Arabidopsis oleosin genes in developmental map.
Arabidopsis gene name	Arabidopsis gene ID	Lineages	Dry seed	Imbibed seed, 24 h	Root	Hypocotyl	Cotyledon	Vegetative Rosette	Rosette Leaf 2	Rosette Leaf 4	Rosette Leaf 6	Rosette Leaf 8	Rosette Leaf 10	Rosette Leaf 12	Cauline Leaf	Senescing Leaf	1st Node	Stem, 2nd Internode	Leaf 1 + 2	Leaf 7, Petiole	Leaf 7, Distal Half	Leaf 7, Proximal Half	Shoot Apex, Inflorescence	Shoot Apex, Transition	Shoot Apex, Vegetative	Entire Rosette After Transition to Flowering	Flower Stage 9	Flower Stage 10/11	Flower Stage 12	Flower Stage 15	Flower Stage 12, Stamens	Flower Stage 12, Carpels	Flower Stage 12, Petals	Flower Stage 12, Sepals	Flower Stage 15, Carpels	Flower Stage 15, Petals	Flower Stage 15, Sepals	Flower Stage 15, Stamen	Flowers Stage 15, Pedicels	Mature Pollen	Seeds Stage 3 w/ Siliques	Seeds Stage 4 w/ Siliques	Seeds Stage 5 w/ Siliques	Seeds Stage 6 w/o Siliques	Seeds Stage 7 w/o Siliques	Seeds Stage 8 w/o Siliques	Seeds Stage 9 w/o Siliques	Seeds Stage 10 w/o Siliques
AtGRP17	AT5G07530	T oleosin	14.13	5.65	13.68	12.77	5.45	10.8	12	5.7	7.23	3.65	8.47	7.15	7	5.73	7.13	5.48	9.38	11.53	6.03	8.92	11.4	8.65	14.47	21.6	116.4	1182.23	1811.63	9.78	3347.52	13.27	34.73	57.45	10.48	12.2	5.58	20.72	9.33	7.47	9.93	10.58	32.45	18.52	30.35	41.92	41.8	50.82
AtGRP16	AT5G07540	T oleosin	11.37	4.55	10.25	9.8	10.58	12.77	12.07	12.37	7.72	8.35	8.55	8.77	10.3	8.3	8.32	10.2	11.12	8.75	10.93	8.15	8.03	6.63	12.72	12.55	16.08	399.18	1003.83	11.97	1734.38	9.33	20.23	27.33	9.13	11.62	10.68	15.87	10.37	38.65	11.02	10.9	20.25	17.3	14.08	13.85	21.78	19.8
AtGRP14	AT5G07510	T oleosin	9.57	3.23	1.65	7.62	8.08	3.38	2.87	9.15	5.48	5.33	4.43	4.4	1.98	4.82	4.58	5.27	7	3.27	5.08	8.9	4.98	1.75	4.27	6.25	24.02	296.6	324.93	4.47	592.13	3.97	10.95	10.58	4.25	9.58	1.9	12.52	1.9	30.65	6.18	13.2	18.02	18.8	13.7	27.8	32.08	37.25
AtGRP18	AT5G07520	T oleosin	3.93	3.25	3.15	5.32	6.18	4.93	4	4.97	5.9	4.45	5.48	5.7	4.28	2.62	4.7	5.72	7.82	2.93	5.15	6.05	3.92	4.62	6.15	7.1	52.98	295.08	342.5	3.45	714.17	2.85	5.87	10.47	2.23	4.35	5.37	4.87	7.52	11.75	4.18	12.72	18.97	7.4	3.7	1.58	11.4	7.73
AtGRP19	AT5G07550	T oleosin	9.06	5.45	5.42	3.75	7.27	4.38	14.03	8.87	6.97	4.08	8.32	5.67	7.08	4.47	1.72	5.32	7.65	3.22	8.87	8.38	2.8	8.32	8.9	29.37	370.47	2567.95	2681.33	4.7	3947.63	1.47	39.1	79.2	3.47	4.55	5.38	18.72	8.78	8.47	7.82	11.78	117.42	32.87	33.02	40.95	35.33	18.47
AtGRP20	AT5G07560	T oleosin	3.64	3.05	6.77	7.33	10.98	5.95	17.12	9.1	16.22	6.18	8.12	5.08	4.52	13.12	3.1	2.47	1.77	4.13	8.18	11.15	5.47	6.9	9.62	12.77	94.55	1213.07	1514.82	4.58	2087.28	5.6	19	30.87	3.25	8.32	7.3	9.7	8.97	14.98	5.18	9.33	29.85	5.67	6.35	9.18	16.77	16.15
AtOLEO9	AT5G07571	T oleosin	NA	NA	NA	NA	NA	NA	NA	NA	NA	NA	NA	NA	NA	NA	NA	NA	NA	NA	NA	NA	NA	NA	NA	NA	NA	NA	NA	NA	NA	NA	NA	NA	NA	NA	NA	NA	NA	NA	NA	NA	NA	NA	NA	NA	NA	NA
AtOLEO11	AT5G61610	T oleosin	NA	NA	NA	NA	NA	NA	NA	NA	NA	NA	NA	NA	NA	NA	NA	NA	NA	NA	NA	NA	NA	NA	NA	NA	NA	NA	NA	NA	NA	NA	NA	NA	NA	NA	NA	NA	NA	NA	NA	NA	NA	NA	NA	NA	NA	NA
AtOLEO6	AT2G25890	SH oleosin	2460.26	314.63	1.83	0.98	0.78	1.62	1.17	1.22	1.32	0.75	1.28	0.68	2.02	0.87	0.77	2.2	0.9	1.28	1.47	0.73	2.2	1.3	1.85	1.12	1.07	18.72	160.7	5.3	1045.72	4.5	26.15	17.87	1.38	2.83	0.98	12.02	1.28	339.68	6.27	26.28	69.6	360.57	1024.28	3836.33	4840.7	4593.7
AtOLEO1	AT4G25140	SH oleosin	1199.81	977.85	3.77	6.32	7.2	3.08	4.12	5.13	2.37	2.97	3.08	5.92	1.62	1.33	0.58	2.05	7.68	5.85	4.17	4.93	4.92	6.13	11.48	2.6	7.2	4.62	5.67	2.85	3.87	5.28	2.53	4.78	5.68	2.8	5.37	2.22	2.03	14.18	3.97	956.77	2888.27	4930.55	5323.57	9584.2	12292.3	11583.6
AtOLEO3	AT5G51210	SH oleosin	768.46	203.13	16.15	11.78	9.22	14.22	9.18	12.27	17.13	13.1	16.02	12.8	11.85	9.98	17.98	18.85	12.48	21.28	6.58	9.85	16.02	14.6	14.47	17.25	22.35	43.73	46.48	14.37	12.87	89.55	48.72	11.07	25.22	8.75	12.63	11.95	18.75	41.97	20.48	2110.3	3279.43	4551.67	4486.15	3336.92	1597.47	1370.28
AtOLEO7	AT3G01570	SL oleosin	2541.05	600.06	10.72	10.48	5.88	10.6	11.03	8.63	5.4	6.23	7.92	14.53	2.88	7.08	9.03	5.85	11.23	3.45	4.22	5.13	23.17	16.62	16.7	10.82	15.42	11.35	9.58	5.25	5.83	12.37	10.63	9.22	14.12	5	6.22	3.75	10.32	23.98	10.82	1266.78	3265.05	5108.57	5624.93	8600.13	10732.3	10174.3
AtOLEO4	AT3G27660	SL oleosin	2230.74	396.77	1.62	39.82	2.62	9.68	11.43	10.32	8.67	3.93	11.18	4.05	7.6	4.23	124.28	6.22	1.58	14.3	2.38	1.68	2.83	2.23	20.63	3.8	10.85	17.7	26.88	21.8	1.77	1.1	1.37	31.28	3.4	3.65	39.72	5.48	12.18	20.97	53.65	903.25	2442.32	4576.05	5028.17	8866.83	11653	10779.8
AtOLEO2	AT5G40420	SL oleosin	1950.09	992.33	2.33	2.58	1.05	0.47	4.88	5.85	8.43	0.98	1.02	1.37	1.75	2.73	0.57	3.65	1.02	3.22	4.32	2.45	0.43	0.62	7.55	3.87	0.33	2.07	0.88	1.7	3.73	2.23	1.42	1.93	4.58	0.75	2.9	2.75	1	9.37	3.65	1264.43	3070.55	4770.2	5205	8032.2	10673.1	9777.72
AtOLEO5	AT1G48990	U oleosin	NA	NA	NA	NA	NA	NA	NA	NA	NA	NA	NA	NA	NA	NA	NA	NA	NA	NA	NA	NA	NA	NA	NA	NA	NA	NA	NA	NA	NA	NA	NA	NA	NA	NA	NA	NA	NA	NA	NA	NA	NA	NA	NA	NA	NA	NA
AtOLEO8	AT3G18570	U oleosin	1408.49	41.16	8.15	4.68	2.48	2.48	3.95	1.57	6.83	2.53	6.43	6.15	3.87	5.83	1.23	3.92	5.08	1.47	6.5	2.63	4.35	4.63	2.93	5.38	3.18	1.85	52.75	6.23	549.08	5.78	15.25	11.43	4.52	7.3	6.53	18.42	6.22	351.68	10.98	71.77	286.3	1156.05	1550.2	3441.35	3379.12	3810.03
