# Supplementary material for: Transcriptome and Regional Association Analyses Reveal the Effects of Oleosin Genes on the Accumulation of Oil Content in Brassica napus
Source: Plants (Basel). 2022 Nov 16;11(22):3140. doi: 10.3390/plants11223140 (PMC9698637; doi:10.3390/plants11223140)
Supplement: Supplementary file 1 [file plants-11-03140-s001.zip › Table S6.xlsx]

## Sheet: Sheet1
Table S6. The average FPKM value of oleosin genes at different stages of seed development.
Gene name	Gene ID	Lineages	25DAP								35DAP								45DAP
			LOC				HOC				LOC				HOC				LOC				HOC
			CS-XY774-3	CS-XY15	KM-XY774-3	KM-XY15	CS-ZY036	CS-ZY511	KM-ZY036	KM-ZY511	CS-XY774-3	CS-XY15	KM-XY774-3	KM-XY15	CS-ZY036	CS-ZY511	KM-ZY036	KM-ZY511	CS-XY774-3	CS-XY15	KM-XY774-3	KM-XY15	CS-ZY036	CS-ZY511	KM-ZY036	KM-ZY511
BnGRP17-Ann	BnaAnng13740D	T oleosin	NA	NA	NA	NA	NA	NA	NA	NA	NA	NA	NA	NA	NA	NA	NA	NA	NA	NA	NA	NA	NA	NA	NA	NA
BnGRP14-C02	BnaC02g01570D	T oleosin	NA	NA	NA	NA	NA	NA	NA	NA	NA	NA	NA	NA	NA	NA	NA	NA	NA	NA	NA	NA	NA	NA	NA	NA
BnGRP17-A03	BnaA03g02100D	T oleosin	0	0	0.0813156	0	0	0	0	0	0	0	0.11684	0	0	0	0	0	0	0	0	0	0	0	0	0
BnGRP14-A03	BnaA03g02110D	T oleosin	0	0.453795	0.703978	0	0.0298943	0.246674	0	0	0	0	0.288697	0	0	0	0	0	0	0	0.208198	0	0	0.455163	0	0
BnGRP14-C03	BnaC03g03140D	T oleosin	0	0	0.340744	0	0.0999957	0.104978	0	0	0	0	0.0784499	0	0	0	0	0	0	0	0	0	0	0.156691	0	0
BnGRP17-Cnn	BnaCnng60890D	T oleosin	0.0305141	0.443347	0	0	0.352185	0.768569	0	0	0	0	0	0	0	0	0	0	0	0	0	0	0	0	0	0
BnGRP17-A10c	BnaA10g23970D	T oleosin	0.561751	1.41399	0	0	1.71252	0	0	0	0	0	0	0	0	0.021701	0	0	0	0	0	0	0	0	0	0
BnGRP17-A10b	BnaA10g23960D	T oleosin	5.24136	6.72489	0	0.119066	2.34563	3.615	0.0259512	0.222972	0	0	0	0	0	0	0	0	0	0.0341827	0	0.121299	0	0	0	0
BnGRP18-A08	BnaA08g22860D	T oleosin	0.0344364	0.10598	0.87246	0	0	0	0	0	0	0	0.200793	0.195027	0	0	0	0.182668	0	0.241449	0	0.0852683	0	0	0	0
BnGRP14-C09	BnaC09g47930D	T oleosin	0	0	0.0740291	0	0.0337335	0	0	0.62341	0	0	0	0	0	0	0	0.219156	0	0	0	0	0	0.0394744	0	0
BnGRP17-A10a	BnaA10g23950D	T oleosin	0.863221	0	0.37348	0.459025	0.0671762	0.419589	0.0732188	0.160566	0.121037	0.387418	0.761694	0.514221	0.501108	0.618036	0	0	0.709173	0.426537	0.274802	0.426539	1.08264	0.589281	0.0379164	0
BnGRP16-A10	BnaA10g30180D	T oleosin	NA	NA	NA	NA	NA	NA	NA	NA	NA	NA	NA	NA	NA	NA	NA	NA	NA	NA	NA	NA	NA	NA	NA	NA
BnGRP16-Cnn	BnaCnng36370D	T oleosin	0	0	0	0	0	0	0	0	0	0	0	0	0	0	0	0	0	0	0	0	0	0	0	0
BnGRP19-Cnn	BnaCnng36380D	T oleosin	0	0	0	0	0	0	0	0	0	0	0	0	0	0	0	0	0	0	0	0	0	0	0	0
BnGRP19-A10	BnaA10g30190D	T oleosin	0.119584	0	0	0	0.26864	0.268543	0	0	0	0	0	0	0	0	0	0	0	0	0	0	0	0	0	0
BnGRP19-A03	BnaA03g02120D	T oleosin	0	0	0	0	0	0	0	0	0	0	0	0	0	0	0	0	0	0	0	0	0	0	0	0
BnGRP19-C03	BnaC03g03150D	T oleosin	NA	NA	NA	NA	NA	NA	NA	NA	NA	NA	NA	NA	NA	NA	NA	NA	NA	NA	NA	NA	NA	NA	NA	NA
BnOLEO11-C07	BnaC07g31360D	T oleosin	NA	NA	NA	NA	NA	NA	NA	NA	NA	NA	NA	NA	NA	NA	NA	NA	NA	NA	NA	NA	NA	NA	NA	NA
BnOLEO11-A03	BnaA03g40390D	T oleosin	NA	NA	NA	NA	NA	NA	NA	NA	NA	NA	NA	NA	NA	NA	NA	NA	NA	NA	NA	NA	NA	NA	NA	NA
BnOLEO9-A03	BnaA03g02140D	T oleosin	1.6951	0.908113	0.15207	0	1.27557	2.0176	0	0.471043	0.197629	0	0	0	0	0.670895	0	0	0	0	0	0	0	0	0	0
BnGRP20-C03	BnaC03g03170D	T oleosin	0.390638	0.32449	0.306646	0	1.12374	4.09191	0	0.125136	0.334293	0	0.163843	0	0.202908	0.201676	0	0	0	0.0438827	0	0	0	0	0	0
BnGRP20-Anna	BnaAnng06430D	T oleosin	0.222611	1.89484	1.49274	0.137298	0.833323	0.735783	0.0307138	0.229813	0.652531	0.809858	1.50399	0.464123	0.48914	1.53033	0.415021	0.149776	0.320718	0.104202	0.301179	0	0.881964	1.38603	0.0310834	0.303979
BnGRP20-C02a	BnaC02g01550D	T oleosin	0	0	0	0.0651366	0	0	0	0	0	0	0	0	0	0	0	0	0	0	0	0	0	0	0	0
BnGRP20-Annb	BnaAnng06440D	T oleosin	0	0	0	0	0.107856	0.310658	0	0	0	0	0	0	0.0228449	0.184625	0.0956297	0	0.0229897	0	0	0	0.0205451	0.0625863	0.216027	0
BnGRP20-C02b	BnaC02g01560D	T oleosin	0	0	0	0	0	0	0	0	0	0	0	0	0	0	0	0	0	0	0	0	0	0	0	0
BnOLEO4-A02	BnaA02g29000D	SL oleosin	29.4362	53.3115	952.011	2304.26	108.534	229.647	4997.79	2507.04	2348.71	3730.43	2532.67	2574.37	4859.56	4184.22	4568.7	4902.26	5572.66	6270.06	3401.13	3367.76	10998.5	6819.25	4637.4	3338.09
BnOLEO4-C02	BnaC02g37030D	SL oleosin	42.5151	60.7114	874.687	2133.22	73.5494	210.785	4986.72	1510.72	2058.84	3128.4	1282.08	1992.36	2938.28	3017.26	4503.86	4596.81	4864.77	5870.47	2944.14	2651.42	5620.17	4758.82	4515.11	3426.87
BnOLEO4-A09	BnaA09g02110D	SL oleosin	47.8643	61.9473	1544.8	5215.54	168.611	295.081	10689.1	11083.7	1706.73	2087.66	2004.27	4071.96	12580.2	7366.79	12212.1	11580.1	3536.97	3747.65	6888.4	8438.06	26852.2	13441.2	11749.1	9472.78
BnOLEO2-C04	BnaC04g32530D	SL oleosin	7.64609	10.6247	326.16	936.073	25.0883	28.9443	2437.63	1485.23	806.856	1710.95	756.607	1348.5	2170.64	2079.24	2823.36	2533.32	2927.04	3559.99	1450.95	1819.07	4269.42	3076.1	2515.33	2306.58
BnOLEO2-C06	BnaC06g12930D	SL oleosin	20.4721	30.29	537.758	1064.26	192.136	188.525	1448.29	805.29	1214.01	1517.51	1017.1	1062.25	1301.22	1024.67	1224.14	1348.47	1404.82	1584.33	1146.36	1070.24	1675.5	1314.34	1192.26	981.997
BnOLEO2-A07	BnaA07g14960D	SL oleosin	38.5646	42.8153	151.284	385.968	28.4308	30.6994	530.338	237.154	350.846	471.833	263.852	367.121	551.628	152.268	504.544	524.455	531.113	630.633	331.857	366.525	843.384	71.063	482.307	249.258
BnOLEO7-A03	BnaA03g27410D	SL oleosin	15.5486	21.0154	671.816	819.038	38.9552	124.753	1510.79	859.607	1311.13	1389.99	869.031	1002.46	1452.62	1445.35	1364.81	1384.26	1331.64	1353.7	913.24	955.53	1650.39	1523.59	1383.05	1071.02
BnOLEO7-C03	BnaC03g32430D	SL oleosin	40.3485	59.1637	930.785	1799.02	25.0469	148.217	2465.18	1541.26	2235.98	2348.97	1511.67	1971.84	2474.61	2178.42	1814.18	1823.44	2163.94	1984.62	1748.23	1798.85	2387.89	2004.91	1827.58	1551.88
BnOLEO6-A04	BnaA04g15210D	SH oleosin	NA	NA	NA	NA	NA	NA	NA	NA	NA	NA	NA	NA	NA	NA	NA	NA	NA	NA	NA	NA	NA	NA	NA	NA
BnOLEO6-C04	BnaC04g38160D	SH oleosin	NA	NA	NA	NA	NA	NA	NA	NA	NA	NA	NA	NA	NA	NA	NA	NA	NA	NA	NA	NA	NA	NA	NA	NA
BnOLEO3-A10	BnaA10g05760D	SH oleosin	12.8914	18.5336	301.792	932.118	9.91354	12.2101	1703.09	748.351	951.782	1507.71	597.661	1027.39	2484.66	1733.48	1289.5	1228.11	1861.66	1786.91	865.052	1109.98	3132.27	2553.38	1313.64	1440.18
BnOLEO3-C09	BnaC09g27370D	SH oleosin	2.77565	3.39546	57.239	343.773	5.20714	5.17414	1153.07	579.739	349.1	826.381	209.344	565.62	1488.14	1045.59	913.135	863.156	1233.18	1093.02	488.59	713.668	2159.55	1672.58	922.203	861.795
BnOLEO1-A03	BnaA03g47170D	SH oleosin	24.7619	24.3801	713.599	2843.05	29.2156	36.305	7090.2	3127.18	2400.62	4422.3	2249.03	3331.48	3197.7	4273.84	6292.37	6854.51	7561.05	8241.67	4516.76	4639.51	5688.9	6563.04	6504.02	4948.37
BnOLEO1-C07	BnaC07g39370D	SH oleosin	68.6938	65.0327	863.756	4166.69	35.4604	105.502	6320.44	2695.42	2376.84	4136.3	1942.19	3296.42	5043.69	4677.56	6014.52	6639.44	6048.13	6656.57	3834.17	4573.82	8034.37	5693.26	6506.12	4716.79
BnOLEO1-C08	BnaC08g11970D	SH oleosin	394.106	702.866	2604.25	223.239	519.873	998.298	3511.05	3742.85	5534.36	5995.16	6002.94	5860.94	4793.67	5603.82	4678.26	744.649	8198.51	9194.01	4983.35	4237.05	6743.35	6394.68	2280.27	3888.31
BnOLEO1-A08	BnaA08g14540D	SH oleosin	631.983	852.18	4381.99	6755.86	322.551	805.748	11920.5	5733.17	8197.91	10154.7	6777.03	8665.88	8425.3	9650.1	11618.4	11719.9	11470.9	12458.4	9349.97	8735.97	12311.9	11646	12128.6	9673.09
BnOLEO1-A01	BnaA01g14480D	SH oleosin	116.871	147.735	1298.67	2156.86	24.6126	219.083	5113.25	2187.02	2637.96	4342.9	1986.72	3283.85	227.121	3369.14	4337.48	4790.95	6576.75	6639.96	3259.32	3504.75	408.493	5184.73	4451.2	3679.42
BnOLEO1-C01	BnaC01g17050D	SH oleosin	34.2433	57.0346	540.554	1114.97	63.7124	101.577	3037.97	1298.75	1234.49	1604.03	928.268	1681.65	2322.12	2049.25	2757.68	2827.78	3120.06	3429.76	1896.78	1995.44	3773.28	1892.23	2871.15	2158.96
BnOLEO5-A06	BnaA06g03370D	U oleosin	NA	NA	NA	NA	NA	NA	NA	NA	NA	NA	NA	NA	NA	NA	NA	NA	NA	NA	NA	NA	NA	NA	NA	NA
BnOLEO5-CO6	BnaC06g02430D	U oleosin	NA	NA	NA	NA	NA	NA	NA	NA	NA	NA	NA	NA	NA	NA	NA	NA	NA	NA	NA	NA	NA	NA	NA	NA
BnOLEO5-C08	BnaC08g03140D	U oleosin	NA	NA	NA	NA	NA	NA	NA	NA	NA	NA	NA	NA	NA	NA	NA	NA	NA	NA	NA	NA	NA	NA	NA	NA
BnOLEO8-C01	BnaC01g34070D	U oleosin	NA	NA	NA	NA	NA	NA	NA	NA	NA	NA	NA	NA	NA	NA	NA	NA	NA	NA	NA	NA	NA	NA	NA	NA
BnOLEO8-A10	BnaA10g05240D	U oleosin	NA	NA	NA	NA	NA	NA	NA	NA	NA	NA	NA	NA	NA	NA	NA	NA	NA	NA	NA	NA	NA	NA	NA	NA
BnOLEO8-A01	BnaA01g26680D	U oleosin	NA	NA	NA	NA	NA	NA	NA	NA	NA	NA	NA	NA	NA	NA	NA	NA	NA	NA	NA	NA	NA	NA	NA	NA
BnOLEO8-C05	BnaC05g34600D	U oleosin	NA	NA	NA	NA	NA	NA	NA	NA	NA	NA	NA	NA	NA	NA	NA	NA	NA	NA	NA	NA	NA	NA	NA	NA
BnOLEO8-A05	BnaA05g21590D	U oleosin	NA	NA	NA	NA	NA	NA	NA	NA	NA	NA	NA	NA	NA	NA	NA	NA	NA	NA	NA	NA	NA	NA	NA	NA
BnOLEO8-C03	BnaC03g40520D	U oleosin	NA	NA	NA	NA	NA	NA	NA	NA	NA	NA	NA	NA	NA	NA	NA	NA	NA	NA	NA	NA	NA	NA	NA	NA
BnOLEO8-A03	BnaA03g34830D	U oleosin	NA	NA	NA	NA	NA	NA	NA	NA	NA	NA	NA	NA	NA	NA	NA	NA	NA	NA	NA	NA	NA	NA	NA	NA
