# Supplementary material for: Transcriptome and Regional Association Analyses Reveal the Effects of Oleosin Genes on the Accumulation of Oil Content in Brassica napus
Source: Plants (Basel). 2022 Nov 16;11(22):3140. doi: 10.3390/plants11223140 (PMC9698637; doi:10.3390/plants11223140)
Supplement: Supplementary file 1 [file plants-11-03140-s001.zip › Table S7.xlsx]

## Sheet: Sheet1
Table S7. Detailed analysis of haplotype alleles of oleosin genes related to oil content in the haplotype regions of chromosome C01 and A03.
Chr	Haplotype posistion (bp)	Haplotype alleles		No.of accessions	Oil content (%)
					GH_2012	Field_2013	Field _2014
C01	11,575,987-11,987,271	BnOLEO1-C01-Hap1	AGG	4\50	46.42±1.03▲	43.22±1.3▲	40.77±0.23▲
		BnOLEO1-C01-Hap2	GTA	40\50	42.96±3.16*	38.78±3.28*	37.88±2.23*
A03	13,459,752-13,642,146	BnOLEO7-A03-Hap1	GTA	5\50	47.55±1.32▲	42.54±1.65▲	40.34±1.21▲
		BnOLEO7-A03-Hap2	ATA	31\50	42.86±3.47**	38.97±3.29*	37.97±2.34*
		BnOLEO7-A03-Hap3	ACC	3\50	42.83±1.44**	38.28±2.01*	36.38±1.05**
Symbols show significant differences compared with BnOLEO1-C01-Hap1 and BnOLEO7-A03-Hap1: *p ≤0.05,**p ≤0.01.
