# Supplementary material for: Transcriptome and Regional Association Analyses Reveal the Effects of Oleosin Genes on the Accumulation of Oil Content in Brassica napus
Source: Plants (Basel). 2022 Nov 16;11(22):3140. doi: 10.3390/plants11223140 (PMC9698637; doi:10.3390/plants11223140)
Supplement: Supplementary file 1 [file plants-11-03140-s001.zip › Table S8.xlsx]

## Sheet: Sheet1
Table S8. GO enrichment analyses of target module genes.
Module name	Class	GO_ID	GO_Name	P_value	EnrichmentScore
Blue	Biological process	GO:0046034	ATP metabolic process	1.11022e-16	2.62028
		GO:0071704	organic substance metabolic process	3.66374e-15	1.10346
		GO:0051274	beta-glucan biosynthetic process	1.11905e-08	2.45673
		GO:0006754	ATP biosynthetic process	1.63529e-07	2.79036
		GO:0009062	fatty acid catabolic process	1.27644e-05	1.40297
		GO:0033993	response to lipid	1.68265e-05	2.61294
		GO:0005975	carbohydrate metabolic process	2.63931e-05	1.25323
	Cellular component	GO:0005618	cell wall	1.11022e-16	2.26233
		GO:0005794	Golgi apparatus	2.22045e-16	1.83382
		GO:0009536	plastid	2.22045e-16	1.24663
		GO:0005783	endoplasmic reticulum	4.44089e-16	1.77183
		GO:0005743	mitochondrial inner membrane	3.11252e-11	1.89554
		GO:0009507	chloroplast	3.11036e-08	1.14723
		GO:0005811	lipid droplet	1.08001e-05	3.22056
	Molecular function	GO:0005524	ATP binding	1.11022e-16	1.56231
		GO:0097367	carbohydrate derivative binding	4.44089e-16	1.54746
		GO:0060229	lipase activator activity	1.08001e-05	3.22056
		GO:0036402	proteasome-activating ATPase activity	1.41712e-05	5.17417
		GO:0008289	lipid binding	8.83797e-05	1.45575
		GO:0005504	fatty acid binding	0.000148316	2.16401
		GO:0016004	phospholipase activator activity	0.000543869	4.13934
Yellow	Biological process	GO:0009266	response to temperature stimulus	1.01807e-13	3.03275
		GO:0009644	response to high light intensity	7.43906e-09	7.60475
		GO:0019915	lipid storage	1.90704e-07	9.28039
		GO:0010431	seed maturation	9.29446e-07	5.55079
		GO:0033993	response to lipid	2.76874e-05	1.92004
		GO:0010231	maintenance of seed dormancy	5.68219e-05	12.3351
		GO:0010876	lipid localization	0.000112341	3.3201
	Cellular component	GO:0005829	cytosol	3.4418e-12	1.7173
		GO:0005737	cytoplasm	7.99905e-12	1.22291
		GO:0005811	lipid droplet	3.76229e-11	11.4457
		GO:0012511	monolayer-surrounded lipid storage body	2.38715e-08	11.9396
		GO:0005783	endoplasmic reticulum	3.99677e-05	1.78197
		GO:0005773	vacuole	8.31149e-05	1.73169
		GO:0031090	organelle membrane	0.000508646	1.46773
	Molecular function	GO:0016491	oxidoreductase activity	5.98941e-11	2.21873
		GO:0051082	unfolded protein binding	3.75321e-09	5.81696
		GO:0016208	AMP binding	5.68864e-07	13.108
		GO:0051087	chaperone binding	9.04409e-06	7.95482
		GO:0031072	heat shock protein binding	9.64472e-05	5.69991
		GO:0016209	antioxidant activity	0.000146611	3.64374
		GO:0043169	cation binding	0.00023506	1.43857
