# Supplementary material for: Transcriptome and Regional Association Analyses Reveal the Effects of Oleosin Genes on the Accumulation of Oil Content in Brassica napus
Source: Plants (Basel). 2022 Nov 16;11(22):3140. doi: 10.3390/plants11223140 (PMC9698637; doi:10.3390/plants11223140)
Supplement: Supplementary file 1 [file plants-11-03140-s001.zip › Table S9.xlsx]

## Sheet: Sheet1
Table S9. List of genes and their corresponding FPKM values in the co-expression subnetwork.
Gene name	Gene ID	Category	FPKM value
			CS-25DAP			CS-35DAP			CS-45DAP			CS-25DAP			CS-35DAP			CS-45DAP			CS-25DAP			CS-35DAP			CS-45DAP			CS-25DAP			CS-35DAP			CS-45DAP			KM-25DAP			KM-35DAP			KM-45DAP			KM-25DAP
			XY774-3_A	XY774-3_B	XY774-3_C	XY774-3_A	XY774-3_B	XY774-3_C	XY774-3_A	XY774-3_B	XY774-3_C	XY15_A	XY15_B	XY15_C	XY15_A	XY15_B	XY15_C	XY15_A	XY15_B	XY15_C	ZY036_A	ZY036_B	ZY036_C	ZY036_A	ZY036_B	ZY036_C	ZY036_A	ZY036_B	ZY036_C	ZY511_A	ZY511_B	ZY511_C	ZY511_A	ZY511_B	ZY511_C	ZY511_A	ZY511_B	ZY511_C	XY774-3_A	XY774-3_B	XY774-3_C	XY774-3_A	XY774-3_B	XY774-3_C	XY774-3_A	XY774-3_B	XY774-3_C	XY15_A	XY15_B
BnACBP2-A01	BnaA01g16660D	Lipid transport	18.9245	13.9393	13.1382	18.7775	16.4539	21.1505	80.2953	70.526	74.3761	10.2765	15.5667	10.5554	33.6052	26.3807	26.3954	64.413	65.8782	62.1943	8.09651	8.51262	7.2186	33.4797	36.2881	36.0415	96.4012	101.299	95.6049	10.5797	9.30448	8.00671	29.53	30.2658	30.1732	74.1285	70.7551	66.752	9.26096	12.2803	11.4509	11.6049	11.5642	11.1498	20.7579	23.2743	20.2836	51.4177	52.3577
BnACBP1-A02	BnaA02g10270D	Lipid transport	13.3266	12.48	14.5555	16.308	14.8662	17.4475	6.76114	5.87023	6.98554	17.8197	16.4906	19.6839	13.7665	10.9878	14.0668	13.6466	7.48999	7.74249	24.5191	22.891	22.0487	11.2133	9.81943	11.722	5.84202	6.97179	6.04762	29.952	34.2428	31.8884	21.7513	24.4447	22.7651	13.4816	14.9939	12.4608	18.7692	15.9537	20.0854	21.5244	22.8088	22.5404	12.0497	17.4249	10.3012	7.2397	5.39347
BnLTP3-A03	BnaA03g09530D	Lipid transport	60.1664	36.0225	45.6198	9.09417	11.1614	11.9322	11.0065	10.3886	4.05719	77.0185	48.8853	63.6602	4.34481	11.02	10.4491	9.00162	9.18437	10.6049	66.0383	60.2869	71.4072	6.54115	7.67026	5.48375	1.81647	3.83228	1.63078	12.2685	9.75993	17.0246	3.98545	3.72	1.39746	0.906105	0.775712	1.03879	42.2721	44.4241	39.1702	56.0717	43.3917	44.6303	15.8062	15.5363	16.7947	14.0455	11.3073
BnLTP5-A03	BnaA03g41390D	Lipid transport	58.9067	50.8689	46.7077	27.0945	19.5825	27.2336	6.49216	1.89667	7.78984	77.718	86.8656	52.3207	19.3306	18.0717	14.4633	7.33226	6.45814	7.88964	130.801	132.164	126.031	26.8948	24.4885	35.4532	6.37398	8.16994	5.23236	87.6479	85.1877	88.6591	28.0038	20.8073	26.2594	3.35948	6.83057	3.6107	62.3191	57.8274	48.5278	25.5096	20.4231	20.6839	6.13936	10.4859	9.42589	9.4231	9.96945
BnLTP2-A04	BnaA04g22070D	Lipid transport	39.897	35.6249	36.6262	456.18	438.785	454.317	1195.08	1307.85	1165.73	51.4005	51.6044	51.0922	803.924	788.219	776.324	1106.07	1082.43	1163.44	80.6246	86.2774	87.2346	1489.34	1487.95	1512.3	3741.56	3674.8	3622.13	38.9774	39.1286	32.6103	526.778	513.998	542.661	1080.75	1201.69	1059.75	293.028	285.76	283.561	655.705	653.76	626.379	1181.09	1158.58	1245.68	1970	2079.74
BnLTP6-A05	BnaA05g29430D	Lipid transport	68.0013	52.1376	57.8657	13.4497	14.2579	12.7979	1.83627	1.66521	4.05132	49.6561	47.7954	51.3934	6.01921	4.59074	9.26459	0.61838	0	1.89799	206.775	204.544	214.546	27.883	26.5119	26.3135	4.21597	3.95774	4.64489	105.653	105.536	104.019	34.4882	36.9315	40.4163	5.86893	8.30415	6.67227	21.0428	26.874	18.4755	22.5461	19.8166	19.6078	11.0341	18.8071	15.369	11.2201	10.9411
BnLTPG1-A07	BnaA07g08700D	Lipid transport	45.3798	24.7297	27.1758	85.1966	87.6179	78.8603	186.439	172.164	149.546	40.9046	42.3283	39.4817	117.053	97.9489	113.615	303.635	289.88	302.207	73.4985	64.3768	63.9008	100.654	92.1168	94.05	267.974	270.324	266.219	69.4586	64.6671	62.4729	89.2864	108.798	94.2248	118.402	119.665	100.077	82.7138	75.1909	67.0626	85.4255	93.3889	83.9815	97.4427	84.1334	84.8232	57.9413	67.0699
BnACBP6-A09	BnaA09g24910D	Lipid transport	113.438	112.178	102.099	106.752	121.375	109.707	30.3078	33.9212	31.6294	125.993	150.27	143.431	94.0353	105.975	99.3706	24.936	28.7314	30.1682	158.801	173.869	160.182	107.618	92.4244	97.6868	44.3773	42.7146	44.3006	180.07	193.53	186.636	109.751	134.386	115.694	51.0221	56.8016	59.1253	135.945	135.596	130.011	95.1247	110.416	115.265	50.2312	50.0175	42.2023	37.7544	31.7297
BnLTPG1-A09	BnaA09g27660D	Lipid transport	49.5953	52.1044	50.2954	38.4504	41.3155	45.1098	14.1698	16.0523	13.8471	91.1718	89.2231	81.1647	32.5348	30.9324	32.9869	9.6294	10.5025	14.2304	140.187	130.008	129.834	19.2576	23.0961	20.7272	10.8262	8.19911	6.97805	107.8	105.732	109.112	26.9557	31.1951	34.5191	12.4624	9.03572	11.9458	90.9771	90.7165	88.2772	72.4555	74.8084	79.479	32.6361	41.3074	33.2947	32.0534	30.7805
BnACBP2-C01	BnaC01g20440D	Lipid transport	15.8239	8.33361	10.3669	9.44244	8.81543	9.99466	47.3106	37.1367	43.7459	11.3908	5.91523	9.26058	19.4869	17.2195	17.2401	44.9888	43.6165	47.6403	7.27323	7.13276	6.33488	15.0658	18.265	18.9062	68.381	68.5145	73.5004	5.60809	3.24798	6.26194	14.9984	13.9609	13.3057	32.5664	30.3099	29.716	5.18957	5.70024	4.96195	8.10081	8.16208	7.30186	15.2613	12.1436	16.9415	4.38748	6.06472
BnLTP6-C03	BnaC03g36390D	Lipid transport	127.408	83.0111	73.8891	11.716	11.0144	13.4405	1.82292	3.15441	3.2998	47.8255	39.1489	60.2839	7.25592	7.85049	8.75679	5.21802	3.1734	4.83012	88.8776	91.1916	87.3863	19.4032	20.1846	19.981	3.6639	3.14181	2.85675	70.9547	88.9051	79.9887	16.3955	19.7475	15.3914	9.78676	12.3657	15.4949	26.8517	25.0982	30.7835	17.9237	20.6867	19.8546	9.05027	21.4345	10.1055	13.4035	12.4354
BnLTPG1-C03	BnaC03g58190D	Lipid transport	76.6533	56.2126	48.0251	18.9592	22.9457	22.0524	3.01312	4.46648	2.34952	75.7837	78.5154	75.283	5.16636	9.62163	6.32538	5.4182	4.23661	5.65649	63.1039	70.0422	67.0483	10.1984	11.4008	12.2262	7.36346	5.59259	6.3056	117.107	94.9534	107.787	23.9732	13.3118	19.3636	3.67309	3.24933	2.4213	69.9672	72.7218	63.7214	47.4407	50.6321	42.6	13.425	19.0773	14.7404	13.6647	13.8627
BnLTP2-C04	BnaC04g45790D	Lipid transport	7.33358	5.92042	14.5758	1208.51	1175.39	1226.39	859.345	699.322	832.566	15.1077	19.0077	19.4539	1201.54	1208.2	1174.39	982.157	1005.02	979.374	204.767	203.952	215.63	455.957	475.51	458.812	681.892	696.406	718.71	59.7825	65.3164	62.7458	694.635	656.967	722.434	547.576	565.609	579.672	598.46	595.946	597.924	946.585	980.913	1073.72	873.861	951.038	811.112	1021.33	1123.8
BnLTPG1-C07	BnaC07g11810D	Lipid transport	22.2215	20.9477	11.5685	84.5026	83.0978	80.7415	212.466	226.076	209.932	27.1627	27.1108	38.3567	157.002	148.403	135.111	261.759	277.015	270.973	40.0397	40.5207	40.5348	144.013	145.977	143.253	261.507	248.166	266.677	36.0557	34.8314	47.8662	109.584	122.091	138.119	183.081	171.523	175.218	98.0829	89.0187	91.6769	133.376	138.816	136.787	269.704	275.441	235.895	200.398	199.457
BnmtACP2-A02	BnaA02g12050D	Lipid/Fatty acid metabolism	64.34	79.2096	69.1717	49.946	57.2441	49.6502	20.6076	24.0196	16.3698	95.4178	94.1488	85.2365	36.9968	39.5455	36.5298	21.7325	26.0332	21.6463	162.938	176.635	160.604	22.2004	23.1124	24.5033	20.5651	23.2628	25.3825	96.1156	88.064	88.8574	45.4152	50.613	39.8438	24.009	25.1787	21.5663	56.1551	59.3522	53.205	66.8981	61.7692	67.2695	28.8094	39.5495	41.4388	23.0064	19.6472
BnKASI-A02	BnaA02g24400D	Lipid/Fatty acid metabolism	81.8923	63.6245	78.8998	117.935	118.95	114.669	19.5404	22.6804	25.5363	104.847	109.695	121.535	58.8057	63.8389	57.4965	17.3343	14.4508	14.5384	236.697	229.85	228.507	54.0973	56.2578	58.806	16.059	16.0468	15.7581	1.66772	1.50248	1.3242	46.6443	47.0616	47.6884	14.4431	14.1388	15.8795	203.451	203.863	196.507	185.83	184.888	179.513	56.0622	62.528	61.8795	1.08728	1.42651
BnCAC1-A03	BnaA03g06000D	Lipid/Fatty acid metabolism	38.4495	28.5502	34.68	26.8355	24.9578	28.3397	2.59829	5.02871	2.47425	36.5042	44.0918	47.1747	12.5246	19.0663	19.9528	1.35227	1.65725	1.3835	63.7028	66.7198	64.4657	6.28221	9.70179	8.60868	0.214406	0.562912	1.38196	62.4141	61.2482	69.9616	14.7297	12.0118	12.666	2.49553	2.13641	2.28877	46.1545	46.2655	45.1261	35.2069	35.6657	35.5175	19.9834	14.2906	20.5388	12.8943	8.65889
BnTIL-A03	BnaA03g09920D	Lipid/Fatty acid metabolism	8.64172	1.54752	5.03639	53.131	51.2735	52.1009	122.896	107.968	103.467	6.45947	3.17505	6.35894	51.8122	51.2573	54.9672	133.492	121.296	129.732	14.6314	10.1328	10.2021	61.0916	63.2123	54.6818	168.826	180.037	203.851	48.9198	47.9362	43.5433	118.23	127.218	125.627	188.783	170.368	182.911	32.3897	36.3317	30.376	42.4838	50.8946	49.5026	61.4546	57.1175	56.6782	45.2502	43.8614
BnFAD3-A03	BnaA03g13590D	Lipid/Fatty acid metabolism	5.54053	3.1854	5.16643	47.3416	46.4528	55.0007	110.522	118.792	108.752	15.2197	6.80333	7.51854	82.1092	82.3208	72.0938	117.059	118.042	104.083	17.6399	16.0112	14.7699	89.3499	96.2946	95.3492	99.6604	101.428	108.189	18.4118	19.9339	23.9291	88.762	92.8349	92.4705	147.075	148.688	142.491	19.9542	22.9007	23.3229	31.9362	29.2549	30.718	50.1212	59.1503	50.0902	87.5297	94.4388
BnMOD1-A03	BnaA03g38220D	Lipid/Fatty acid metabolism	95.4768	74.2538	88.205	190.255	194.22	194.723	32.4537	34.1958	33.2528	129.821	128.562	138.701	99.4868	98.3918	107.172	22.2018	22.2399	20.9214	226.963	236.424	236.575	89.6566	93.4881	88.889	24.0191	23.257	24.2204	204.273	214.558	218	136.11	132.117	127.114	47.9254	42.9614	44.9365	195.631	200.479	197.878	160.316	160.939	150.853	56.8397	53.954	49.5504	43.5091	43.5856
BnPLIP1-A04	BnaA04g00580D	Lipid/Fatty acid metabolism	7.897	6.75581	4.03255	30.1052	28.1286	27.9251	45.777	38.6904	44.6388	9.00048	8.78065	9.76352	46.3415	37.4049	39.8274	47.1856	46.0821	50.6176	3.22326	3.5036	3.85993	36.8679	33.1841	33.7352	41.938	44.0217	41.4978	17.9846	19.1238	19.1018	52.2394	49.1365	46.1532	38.9311	41.0184	39.0178	30.4931	33.2851	38.3952	20.645	20.163	20.4056	29.5038	27.5623	25.4435	59.0251	57.3
BnMIPS2-A04	BnaA04g12720D	Lipid/Fatty acid metabolism	1.04334	0.493463	0.381418	11.9695	8.99999	9.11091	21.7064	22.2974	22.6368	0.20383	0.464033	0.125085	13.0268	14.0456	14.9668	15.0987	10.841	13.1101	1.92708	1.16819	3.0739	39.3949	41.4841	38.3914	49.7531	53.3104	49.3819	3.03466	4.14652	3.95635	46.115	51.4775	49.7794	45.6296	49.9052	50.4536	23.4789	22.4981	18.9257	10.069	9.69746	8.7877	38.5375	33.5615	40.0621	48.8583	56.7932
BnCAC3-A05	BnaA05g06620D	Lipid/Fatty acid metabolism	28.7599	40.7721	48.9309	52.0888	53.9296	55.7882	22.8019	17.7179	24.1705	52.9481	64.1547	65.9382	36.0202	37.2892	33.6948	14.3873	14.022	14.8992	80.0612	78.931	81.7357	32.1129	35.8452	33.7735	14.2989	14.8996	15.3577	95.1181	101.665	108.377	45.1785	41.9974	44.9164	33.3875	29.0501	34.5778	76.3531	79.7898	78.3571	54.5408	48.633	52.2124	29.6936	23.835	23.2241	32.5522	30.2452
BnEMB3147-A05	BnaA05g12180D	Lipid/Fatty acid metabolism	62.3096	56.2059	68.888	77.5857	76.4406	67.9647	22.8599	24.2071	22.5381	86.8653	80.5497	69.28	48.3532	46.1173	42.425	14.342	18.1779	16.0183	139.794	147.292	138.392	72.3847	75.1803	72.5613	19.1581	21.5485	22.5349	137.986	128.747	126.611	75.7632	77.1678	68.9109	32.895	35.2339	28.674	80.9556	85.5154	85.0265	82.5497	74.3895	76.0586	34.1655	38.7282	44.6239	42.6677	44.8904
BnCAC2-A06	BnaA06g06030D	Lipid/Fatty acid metabolism	66.8962	80.4483	85.7539	131.614	144.65	126.273	37.1214	30.9826	40.3439	118.739	123.497	110.141	80.7854	92.8023	84.4813	32.5616	27.8008	28.485	176.545	178.613	171.619	90.7873	90.9113	90.7911	33.9422	35.7698	34.5687	165.793	160.35	164.885	109.672	102.259	106.075	54.9033	51.7578	55.2812	140.257	144.08	139.758	109.177	104.327	99.4306	46.5487	52.8197	55.0801	35.9701	32.921
BnMOD1-A07	BnaA07g04370D	Lipid/Fatty acid metabolism	66.3753	66.6985	60.7006	74.4461	71.0138	75.6604	22.1286	21.2184	23.8121	79.8252	69.195	81.6989	50.4288	47.0409	51.6306	13.7728	14.0296	14.6892	115.585	123.297	121.656	53.8469	52.03	50.9358	20.766	20.1408	19.3004	90.3601	93.8098	97.2058	60.6264	65.7459	62.3902	24.54	26.2343	29.6268	73.492	73.6577	76.9493	50.5997	47.5192	47.6472	21.5832	20.6925	21.2107	22.7471	20.3618
BnLACS9-A07	BnaA07g20920D	Lipid/Fatty acid metabolism	27.2685	44.0528	40.7985	61.06	58.465	54.9558	30.1199	15.7481	29.8402	53.9802	56.6892	59.3125	34.399	35.5442	41.2253	19.0386	16.9356	18.1823	63.5188	62.0296	66.447	26.8399	30.7595	28.451	15.667	15.0519	14.7146	63.8885	64.1363	64.2036	44.0468	46.0932	46.6612	25.2832	24.6004	24.8798	83.5546	87.7119	84.9273	50.1704	47.4966	45.8272	17.0984	16.132	14.3115	20.8026	15.0038
BnFRK6-A07	BnaA07g25850D	Lipid/Fatty acid metabolism	58.2385	55.2192	55.2867	92.5499	100.5	83.0201	17.2412	10.6922	12.3666	94.1276	91.603	88.6946	38.0273	41.4643	45.9847	7.4236	7.72267	10.0863	165.333	167.575	156.064	31.4771	26.4721	25.4305	7.79666	8.28802	8.5759	330.41	330.831	344.127	87.6108	88.4207	81.319	35.2844	32.7079	31.1542	165.116	175.84	162.257	94.1913	93.6482	93.836	22.2866	24.8273	28.2459	27.1432	25.0985
BnFAD6-A08	BnaA08g12780D	Lipid/Fatty acid metabolism	29.5186	35.5681	31.9027	35.0407	35.0559	47.9189	12.9916	9.96202	15.5688	35.6309	36.9137	40.2347	26.2725	24.0178	23.8894	11.9944	10.3133	12.6822	54.806	54.2169	55.5305	25.1182	17.7182	23.104	12.0311	10.2	10.9397	50.9356	58.1447	55.2257	26.0185	23.1284	28.422	16.7659	18.4104	16.8184	63.1875	61.5447	65.4716	48.8361	50.7845	47.2141	26.477	21.757	26.8737	17.3258	21.8181
BnCDS1-A09	BnaA09g13270D	Lipid/Fatty acid metabolism	50.029	40.3154	45.1527	43.1727	41.7048	39.2434	24.0739	24.1543	23.4456	45.6926	49.8628	46.0965	36.0327	36.7239	34.178	20.6446	22.0405	22.0926	32.992	36.8366	31.6746	16.6332	18.0406	19.4157	12.3255	14.9354	11.4802	34.1525	35.2958	31.1401	20.2654	16.7385	14.8976	17.2062	18.8497	16.4016	42.4695	39.9126	42.0482	45.5113	45.485	41.0371	29.648	25.6661	24.8774	5.91142	8.5889
BnAACT1-A09	BnaA09g18440D	Lipid/Fatty acid metabolism	29.8972	24.3122	30.7776	28.898	29.3977	30.574	35.4793	40.2546	42.5148	15.4464	21.6795	20.2474	37.0382	41.9015	39.7731	46.5067	42.1921	46.5851	3.93416	3.72809	4.38712	32.6522	34.2421	31.2555	64.7691	62.4005	59.6365	4.81855	4.008	4.61856	30.6359	30.5167	36.5196	37.7232	38.5998	34.1344	16.0645	16.5072	19.1345	17.0822	16.8295	17.953	20.3532	17.8822	13.5014	22.9125	23.4553
BnPaspA3-A09	BnaA09g20460D	Lipid/Fatty acid metabolism	73.8562	75.8913	81.1867	6.07511	3.32343	6.62752	1.04926	0.941452	1.45757	86.5256	80.53	85.4469	2.55932	3.07282	2.84078	1.14947	1.42068	1.44158	125.227	126.189	130.963	3.51108	3.6686	3.57808	0.45857	0.520941	0.716196	136.722	126.48	129.323	6.50113	8.09084	6.04429	8.5868	11.0719	10.9083	27.9639	29.8639	27.8062	9.19546	9.66535	11.1107	2.29185	1.14823	3.01605	10.9828	12.4838
BnBLP3-A09	BnaA09g35590D	Lipid/Fatty acid metabolism	92.6216	90.8706	89.4322	59.0287	57.0918	53.5779	18.8459	15.1303	17.8862	102.609	90.8464	117.156	44.1985	37.625	37.9077	8.6685	8.23453	9.4551	146.627	146.19	146.677	40.3494	35.4399	39.2461	11.5178	9.59521	10.3451	122.32	128.348	114.84	38.4922	48.1763	47.646	17.6781	18.743	17.1196	103.444	101.882	95.949	72.8887	69.0869	62.6281	31.6286	31.6921	25.0893	16.0201	19.7013
BnCAC2-A09	BnaA09g48250D	Lipid/Fatty acid metabolism	39.6796	48.6183	52.7394	64.7563	64.9412	66.9198	17.3856	17.1087	17.011	75.9018	74.5675	69.9425	39.8044	45.4717	44.5286	11.6017	13.3912	12.0085	105.956	105.899	104.181	40.5068	40.9821	41.7026	12.9409	12.2961	12.5429	94.7401	98.0552	93.2133	49.7879	52.0058	50.1784	23.02	22.2201	23.4796	74.7532	71.6097	77.4951	50.2199	51.1723	51.9538	21.6039	25.5491	22.8025	23.323	29.8046
BnOBAP1a-A10	BnaA10g03690D	Lipid/Fatty acid metabolism	3.02556	3.45194	3.69983	145.989	161.741	158.139	1755.96	1651.65	1717.82	4.92776	3.61199	5.04007	572.084	602.306	614.558	2190.94	2148.95	2188.4	4.516	5.07222	4.67254	639.86	648.792	637.087	3190.78	3238.23	3234.96	4.38721	4.7594	3.8347	432.382	408.831	414.528	1465.81	1562.82	1473.02	14.9544	17.3646	19.6435	107.875	104.379	98.5947	558.922	548.149	600.155	384.784	398.595
BnADS1-A10	BnaA10g04030D	Lipid/Fatty acid metabolism	66.6749	59.5731	59.4012	9.9839	10.0731	13.524	4.45333	4.57695	3.16002	66.4395	70.2559	72.1748	6.61768	10.5639	10.2002	0.991467	0.98668	0.507184	121.189	119.414	109.99	2.61267	2.72893	2.98979	0.269485	0.72963	0.39082	122.059	108.475	110.848	13.5514	16.8515	12.0058	1.34426	3.28942	4.3151	59.531	59.0542	63.8086	63.1048	56.5731	66.3562	15.8674	15.9777	17.4412	10.9049	9.73769
BnSVL1-A10	BnaA10g09570D	Lipid/Fatty acid metabolism	22.5439	25.1841	23.2627	9.5842	11.6787	10.5897	7.62171	6.93652	5.50352	26.6832	25.4684	27.0125	8.07483	9.52829	8.58193	5.21344	5.55178	4.21274	19.4874	19.499	20.5795	5.71697	4.94539	5.44068	6.38118	7.46442	4.64241	34.4073	32.7019	34.6598	12.4267	9.36946	12.2487	9.67536	9.44319	10.4328	29.1353	28.3107	28.9533	26.7714	25.7698	25.2703	10.8853	10.8338	13.5426	14.7209	12.8585
BnLACS4-C01	BnaC01g15670D	Lipid/Fatty acid metabolism	59.3257	59.6661	57.3938	59.1479	63.2082	64.827	23.5879	23.5207	22.8985	70.3717	61.1461	69.5138	62.1218	64.9678	50.4739	16.9714	17.7468	18.3385	59.645	61.5698	61.6511	43.1834	47.2223	45.2457	20.9923	21.3544	18.644	40.5626	38.2842	40.6376	30.7515	33.8201	36.6701	20.0037	15.9834	19.2636	58.2881	53.8248	58.8979	47.0064	47.7373	46.6192	33.9034	34.985	38.0559	29.6234	29.0921
BnACP4-C01	BnaC01g16980D	Lipid/Fatty acid metabolism	37.0265	20.6331	35.3792	30.3889	19.9878	21.5233	2.13898	3.843	2.2824	32.7095	38.2273	50.4981	16.5391	15.4666	15.9103	5.47823	6.2357	4.83549	82.5739	79.8023	89.4788	8.8503	9.84447	11.9849	11.7515	9.15527	12.7449	41.8401	40.9957	43.1355	8.30276	4.64725	9.50525	4.58761	5.70204	4.4997	32.5022	26.1928	23.2884	24.2074	22.0376	21.9687	16.361	16.8691	14.6833	1.47492	1.84623
BnCAC3-C03	BnaC03g21010D	Lipid/Fatty acid metabolism	43.0449	69.7231	64.3634	107.399	102.342	99.7797	46.7797	33.1912	41.5055	84.6825	78.1726	82.6597	71.2132	69.5359	69.0581	26.4055	25.3388	28.0896	105.128	104.372	104.621	56.5324	58.8436	59.1282	25.0594	23.4504	24.0527	102.969	102.501	105.941	61.0267	63.5535	59.2378	41.4563	41.4358	42.4038	140.123	134.654	136.873	107.394	98.472	91.1218	45.999	41.0249	42.7334	40.251	43.3584
BnMTACP1-C03	BnaC03g24880D	Lipid/Fatty acid metabolism	48.4709	49.7512	56.389	41.374	42.3156	32.7131	22.6214	18.9132	18.26	56.4288	63.1459	43.398	42.161	34.0901	35.3862	23.716	19.6458	23.7185	73.7741	66.3498	71.3168	35.7183	31.9145	31.3385	19.1392	21.2144	21.568	67.8394	50.2824	65.3208	37.4262	35.0871	37.7281	14.4155	16.7975	20.803	42.7655	40.9073	39.1402	28.8954	27.9951	29.2771	20.7349	19.7451	21.2231	17.7718	22.496
BnMOD1-C03	BnaC03g45040D	Lipid/Fatty acid metabolism	158.077	115.244	130.57	271.198	257.044	277.949	53.1487	52.8642	59.214	181.97	158.886	185.174	136.193	159.186	142.124	31.0299	31.4977	31.6258	212.414	217.347	208.753	96.6688	94.6096	99.8095	23.3343	25.2433	28.812	240.703	238.364	229.34	128.197	126.132	124.698	46.7834	46.7262	46.4796	251.028	252.425	268.044	226.939	224.125	241.254	92.6993	85.826	78.7902	62.3161	71.5291
BnFAD6-C03	BnaC03g67820D	Lipid/Fatty acid metabolism	36.526	31.1744	26.8302	31.4302	30.3895	32.1702	16.4249	16.2952	14.8944	38.0142	39.0822	43.1259	30.0928	26.7629	24.6524	16.1224	18.6024	15.0605	60.3048	62.1319	60.427	23.5823	24.0389	25.2649	16.5283	15.3349	13.9998	64.6693	65.3893	63.8559	34.7368	35.6482	33.7662	23.6175	22.4021	23.7867	58.3902	60.0208	63.1583	49.1007	51.312	54.2491	28.1289	31.0648	31.7326	15.0759	16.7053
BnMTACP1-C04	BnaC04g05010D	Lipid/Fatty acid metabolism	48.9579	63.187	41.4398	38.3628	44.8411	58.4213	13.1238	17.1857	15.2811	60.1399	71.288	60.9423	35.7578	42.0694	37.8555	18.1063	17.0926	13.3307	74.4109	70.4064	78.1223	20.3931	25.5536	27.0448	18.5126	18.2265	17.1204	59.7376	57.2303	51.9724	34.7728	42.3346	38.1444	19.4328	16.2009	16.4326	33.4603	20.1795	26.8404	22.498	24.654	24.6281	14.0077	14.0359	11.6612	14.7708	20.188
BnEMB3147-C04	BnaC04g14590D	Lipid/Fatty acid metabolism	75.6948	68.6143	66.3343	91.0758	96.7689	92.8299	18.5454	21.8512	27.1338	74.2171	72.7425	93.7345	58.3116	55.9066	57.7816	14.2151	13.5594	14.2417	147.947	146.435	141.877	55.8516	53.9344	58.2809	18.0681	16.463	15.4073	90.3981	87.583	87.1887	57.9902	63.7412	62.5236	23.2319	22.1411	22.6307	84.7344	75.221	78.444	60.5676	61.8503	65.4784	29.1005	27.1368	31.2517	26.9002	31.7256
BnFAP1-C04	BnaC04g20870D	Lipid/Fatty acid metabolism	31.2274	37.5258	35.7162	57.9872	60.3459	61.865	11.27	15.0768	15.5786	38.4409	45.1381	36.1836	31.519	43.4516	30.1391	13.9525	12.3817	11.0016	68.4602	68.1858	69.0493	27.3216	29.8948	29.568	16.9931	14.8993	15.7756	52.037	64.8063	62.5446	36.3565	41.7918	40.1481	20.7488	16.1743	16.6679	61.3001	63.1918	60.638	40.8096	45.8016	50.1306	17.3615	16.217	13.2524	13.2485	13.7471
BnFDH-C04	BnaC04g38330D	Lipid/Fatty acid metabolism	32.6234	30.8156	30.2641	10.3066	9.92881	11.5723	4.23483	7.7203	3.95894	35.2656	35.7305	33.8079	6.8174	6.88306	8.25508	9.60779	9.43481	8.13019	32.0815	32.335	28.7251	5.30022	5.33033	5.95696	4.14292	3.91068	5.40949	22.6311	18.1674	21.9373	10.3261	9.71194	9.6185	6.30631	5.7879	5.64215	27.087	28.8874	26.7151	18.7963	19.7123	20.9694	16.3525	12.9593	13.1872	9.59923	10.3493
BnPPa1-C05	BnaC05g00850D	Lipid/Fatty acid metabolism	26.7211	29.1045	25.18	16.5606	16.9375	17.933	6.39332	6.16012	9.96435	24.534	24.9346	28.2938	12.1456	10.5844	12.6185	8.38775	8.94168	8.26944	25.0248	27.5827	29.3998	13.0341	13.9767	13.1066	5.73066	7.85607	4.3483	24.1363	31.1157	30.4956	15.238	10.4707	17.6857	9.76991	8.52918	7.6226	20.3375	19.6794	18.1779	13.8049	17.9112	16.6105	15.4857	11.3003	15.2474	12.3398	8.17195
BnOBAP1a-C05	BnaC05g03600D	Lipid/Fatty acid metabolism	2.78597	1.68369	3.54581	68.4709	61.8463	72.5276	678.022	741.312	700.458	3.33822	2.62836	2.07827	224.012	229.061	230.487	894.85	901.191	892.997	4.35963	2.94009	4.88047	246.921	247.972	260.752	1581.37	1590.88	1549.08	3.37636	3.61542	3.63039	526.39	508.501	525.433	1762.85	1864.29	1786.13	7.88761	5.42921	6.47261	38.1833	47.0572	38.8565	239.086	240.055	248.112	229.623	235.009
BnCAC2-C05	BnaC05g07580D	Lipid/Fatty acid metabolism	60.0365	75.0321	81.8891	142.68	146.659	141.365	49.3183	38.9079	52.998	99.4064	98.7382	98.7786	108.336	107.286	109.317	34.6411	34.6277	35.3508	157.009	161.873	156.243	118.127	116.422	117.829	52.2902	51.8958	48.6863	136.523	142.247	137.993	122.617	131.735	118.327	66.0899	66.4698	65.3292	145.196	142.267	138.095	115.616	117.276	110.794	55.108	63.4771	57.953	58.7198	66.1156
BnBLP2-C05	BnaC05g37660D	Lipid/Fatty acid metabolism	59.2202	44.4044	39.6447	69.5272	72.4368	76.083	30.509	30.6167	30.4698	59.5565	51.6421	53.1491	55.0465	55.3331	60.4243	22.944	26.2225	25.8947	111.569	102.465	101.104	58.6345	56.0787	62.053	31.8537	29.2796	33.1053	81.3504	84.72	87.8503	76.7102	83.6872	74.5337	43.0071	45.1973	42.5273	73.2621	67.8924	71.87	71.0562	59.6929	66.6359	32.7627	33.9387	33.1292	48.5923	53.1361
BnFAP3-C06	BnaC06g06390D	Lipid/Fatty acid metabolism	29.5419	41.3796	33.4147	82.0924	77.2158	84.1257	11.4132	6.24232	9.1943	42.3828	39.1415	38.6869	55.7508	54.3115	45.3802	3.67804	5.19139	7.96871	80.8566	85.9248	78.3514	46.738	39.4317	42.9875	9.39922	8.78112	8.9548	70.6256	68.7492	72.5502	44.7993	42.5966	32.379	12.8679	16.8172	14.8307	71.7	77.2741	74.1848	48.894	49.1767	53.1672	15.3626	23.2896	20.1239	11.0342	14.6558
BnLACS9-C06	BnaC06g20910D	Lipid/Fatty acid metabolism	91.2812	116.708	107.278	160.518	157.419	157.136	64.8762	46.7685	63.6503	148.425	138.815	142.445	111.168	102.476	103.437	38.7057	42.0702	39.1784	187.279	186.991	186.826	122.497	118.5	122.823	47.5609	45.9259	44.5947	216.703	208.657	209.706	122.231	117.053	118.803	72.7207	71.6234	65.9899	200.016	214.828	198.254	116.188	115.391	116.691	57.8316	51.1929	48.5331	50.3799	55.4729
BnMOD1-C07	BnaC07g04330D	Lipid/Fatty acid metabolism	91.687	94.3894	95.8914	218.555	219.333	223.476	55.3567	38.0442	45.701	127.855	111.942	135.957	119.532	123.397	128.636	30.9669	33.3441	32.3848	265.457	259.412	261.134	131.595	128.677	129.529	42.5259	39.8805	41.058	182.946	195.144	206.827	154.955	154.492	154.285	62.2763	61.7267	67.4641	181.562	169.519	168.876	138.934	136.133	144.555	47.2717	56.7572	52.4756	53.6402	61.3549
BnKASI-C07	BnaC07g19000D	Lipid/Fatty acid metabolism	139.058	125.739	140.095	231.222	223.52	223.091	77.8196	66.3961	71.3173	213.611	211.634	224.21	146.398	148.759	143.864	60.3015	56.5725	55.7223	278.908	279.284	282.204	138.699	134	131.52	35.9066	38.7338	34.6701	328.361	340.592	345.099	168.753	174.378	173.853	70.6586	76.9495	72.7635	310.145	321.988	328.248	282.855	285.493	282.292	136.061	147.768	159.048	120.225	116.583
BnBLP3-C08	BnaC08g27030D	Lipid/Fatty acid metabolism	75.0476	73.8838	63.554	80.2725	67.7252	63.2602	29.7376	19.1565	29.6173	74.8162	80.3725	83.6077	44.6673	48.4972	40.5054	18.8688	18.7777	18.8692	129.473	120.415	123.104	43.7032	44.7687	44.4926	17.4103	20.131	18.5944	103.538	109.741	108.234	54.8296	59.7776	55.8988	26.3908	26.8292	29.5799	87.6163	81.9403	95.4039	68.6931	69.4614	63.9009	38.5985	34.5966	41.7512	31.1681	40.6642
BnMIPS2-C08	BnaC08g35240D	Lipid/Fatty acid metabolism	4.22878	4.64703	3.92861	22.8473	29.4761	25.5335	54.7336	46.6582	58.092	7.01817	9.57153	6.55233	19.0439	16.0795	16.4386	79.6296	73.8196	81.4241	33.6016	30.4782	31.4657	47.6677	41.0999	46.6322	151.756	143.291	135.712	28.2802	31.7145	29.5276	34.4718	32.704	35.4118	72.2458	76.6049	68.6312	49.684	45.2666	46.5045	23.1127	21.9904	23.9006	10.2118	7.95309	10.6504	8.68722	6.8716
BnACAT2-C09	BnaC09g02300D	Lipid/Fatty acid metabolism	45.87	49.5155	46.646	41.4038	46.9512	45.9161	11.7388	8.18275	8.95193	59.3343	56.3811	56.0715	30.2794	27.8884	32.3822	6.42232	5.30905	7.67454	50.2527	53.0469	51.307	22.9983	21.4033	21.8456	7.13607	6.44832	6.52133	50.533	46.5708	52.6565	20.3409	19.619	20.7702	11.5567	12.5653	9.14712	42.7166	36.4419	43.2546	33.3312	32.4883	30.0086	11.1714	11.3075	11.3184	1.20938	0.727238
BnACP2-C09	BnaC09g16320D	Lipid/Fatty acid metabolism	56.8106	34.2648	42.874	22.9107	24.0962	25.0994	26.4324	30.118	22.7597	51.3918	55.331	45.2059	17.5782	19.9723	24.1712	15.9697	16.6194	14.7446	73.9113	77.7137	71.5867	24.668	20.9924	22.9039	11.5794	13.7718	13.4344	184.523	184.741	186.482	77.8373	83.067	82.9028	66.7259	58.4291	63.1336	41.1067	45.756	43.1373	38.3804	35.4196	34.5507	26.4392	25.0924	23.8716	27.8873	35.2454
BnKASI-C09	BnaC09g19280D	Lipid/Fatty acid metabolism	59.806	59.4751	56.6556	86.6604	86.0978	98.8717	33.3575	27.8844	31.4449	94.466	90.4926	84.761	53.0397	61.3196	59.8039	22.3029	22.6576	22.4377	130.254	126.057	125.248	48.7396	45.2934	51.9356	21.9243	20.4104	19.3595	128.819	127.695	131.528	67.9313	70.4455	68.2962	40.1296	38.4949	38.9723	147.43	148.448	141.206	116.98	115.175	115.493	56.4122	52.9285	60.2601	50.3561	50.3125
BnAACT1-C09	BnaC09g20370D	Lipid/Fatty acid metabolism	5.55418	6.88008	6.42318	10.0107	12.0482	13.2431	26.6907	16.8674	19.2146	4.77436	2.57406	3.81626	17.1806	12.3042	17.2764	31.968	31.157	30.9561	2.80536	2.89408	2.12585	22.1808	17.7666	18.2286	66.729	65.1025	61.1887	3.40143	2.12373	3.5726	15.0208	14.7115	13.978	30.6187	27.6621	28.8995	4.72035	4.95911	4.63359	5.62313	4.65087	4.27781	11.8153	7.51425	10.3816	14.7659	11.8114
BnPaspA3-C09	BnaC09g22820D	Lipid/Fatty acid metabolism	57.655	60.1506	57.986	5.73754	5.86813	5.38818	3.71796	2.98529	3.21925	61.0857	55.8675	65.7662	5.25809	4.28725	7.09655	2.29109	2.53132	2.94891	89.8206	83.409	89.4725	1.99947	2.88636	2.56295	0.281232	0.276885	0.237916	93.3239	90.6951	87.5188	5.92158	8.34122	6.67762	7.47023	7.25092	6.78997	22.0907	24.9934	24.6591	7.66572	10.2549	10.0182	1.95773	2.32947	1.83684	7.57472	9.56438
BnPKP1-C09	BnaC09g29010D	Lipid/Fatty acid metabolism	61.7954	86.4353	84.501	129.593	120.224	123.914	68.0453	50.401	58.593	105.556	103.436	99.1972	100.433	93.4504	92.1107	51.3663	43.2678	49.5316	166.052	164.923	162.763	104.187	101.36	100.254	59.3113	60.732	65.7984	124.347	127.345	129.178	116.206	113.834	108.206	73.8566	75.4616	72.1078	162.381	163.567	166.724	150.364	143.908	144.609	83.8249	74.1037	76.2603	69.8778	70.7301
BnSVL1-C09	BnaC09g31980D	Lipid/Fatty acid metabolism	29.1523	24.3097	27.5998	15.9817	15.206	14.9864	12.1313	11.8226	11.1405	33.7654	34.5296	30.5058	13.6617	11.6979	14.749	6.93697	7.63262	5.24038	41.0775	35.851	37.3742	12.9944	11.3828	10.9863	6.75272	7.29052	8.42059	38.538	33.2932	35.7701	16.0813	11.3038	14.5386	9.99046	9.40478	10.5209	34.6075	32.6262	33.4998	25.0235	28.5406	25.5128	12.4196	12.846	15.4002	12.737	13.0892
BnOLEO1-A01	BnaA01g14480D	Oleosin genes	132.347	103.484	114.783	2635.01	2626.18	2652.7	6300.55	7083.57	6346.12	142.107	157.958	143.141	4405.93	4328.01	4294.76	6683	6554.45	6682.43	25.1598	25.0866	23.5914	232.527	218.197	230.639	389.649	411.777	424.051	218.571	223.81	214.868	3347.36	3374.56	3385.5	5118.63	5261.28	5174.28	1278.6	1297.56	1319.87	1943.83	1960.15	2056.18	3201.45	3242.85	3333.65	2134.98	2147.36
BnOLEO4-A02	BnaA02g29000D	Oleosin genes	24.508	27.4406	36.36	2321.95	2423.35	2300.84	5891.56	5051.82	5774.61	52.2586	57.8873	49.7886	3799.7	3725.27	3666.31	6109.85	6359.87	6340.46	113.003	103.076	109.522	4901.55	4727.6	4949.53	10973.1	10922.3	11100.2	238.325	221.417	229.198	4207.45	4176.38	4168.82	6871.18	6803.49	6783.07	966.696	945.394	943.942	2529.36	2525.98	2542.67	3481.47	3470.69	3251.24	2296.52	2331.21
BnOLEO7-A03	BnaA03g27410D	Oleosin genes	13.6112	13.556	19.4785	1305.87	1321.11	1306.41	1366.39	1292.55	1335.99	21.605	19.987	21.4541	1394.81	1394.04	1381.13	1335.68	1347.05	1378.37	38.2738	37.9498	40.6419	1465.01	1449.84	1443.03	1643.45	1652.09	1655.64	133.635	122.926	117.697	1447.28	1460.23	1428.55	1500.09	1546.06	1524.63	658.909	678.666	677.872	855.995	873.48	877.619	913.686	936.79	889.244	812.171	829.648
BnOLEO1-A03	BnaA03g47170D	Oleosin genes	19.5288	22.2892	32.4678	2360.29	2407.52	2434.06	7302.97	8128.1	7252.09	25.7659	22.219	25.1553	4398.69	4542.3	4325.91	8103.17	8405.76	8216.09	31.4498	27.1578	29.0393	3216.27	3121.4	3255.44	5638.59	5641.87	5786.23	38.4254	35.4139	35.0755	4264.82	4221.04	4335.67	6673.36	6327.14	6688.62	740.674	694.357	705.767	2152.48	2293.11	2301.5	4574.05	4592.81	4383.43	2817.41	2905.97
BnOLEO2-A07	BnaA07g14960D	Oleosin genes	34.6348	34.6809	46.378	343.161	365.303	344.075	555.992	486.269	551.079	41.6624	45.0201	41.7634	486.171	481.716	447.612	661.552	612.799	617.549	27.051	26.7776	31.4638	547.56	546.877	560.448	846.854	867.528	815.77	30.4954	28.1263	33.4763	159.419	162.865	134.52	73.3276	69.6186	70.2427	132.82	158.404	162.629	288.339	259.443	243.773	324.369	338.434	332.768	361.149	407.262
BnOLEO1-A08	BnaA08g14540D	Oleosin genes	649.556	606.608	639.786	8090.9	8171.55	8331.26	11133.6	11920.9	11358.1	820.111	863.048	873.381	10086	10233.5	10144.6	12253.4	12648.4	12473.5	332.64	315.357	319.656	8321.13	8451.54	8503.23	12298.3	12343.7	12293.8	798.499	794.047	824.696	9509.36	9667.92	9773.01	11674.4	11373.4	11890.2	4339.94	4423.86	4382.18	6604.28	6892.54	6834.28	9383.67	9444.64	9221.59	6612.06	6870
BnOLEO4-A09	BnaA09g02110D	Oleosin genes	53.5667	40.3495	49.6766	1747.68	1721.6	1650.9	3221.27	4246.89	3142.75	57.9713	62.9029	64.9677	2150.87	2065.09	2047.04	3636.99	3837.26	3768.69	171.031	163.832	170.968	12564.7	12569.8	12606	27109.1	27218	26229.6	316.98	283.311	284.953	7568.24	7434.91	7097.22	13125.5	13702.2	13495.8	1576.15	1566.36	1491.88	1973.12	1980.54	2059.15	6849.24	6990.44	6825.52	5377.71	5092.02
BnOLEO3-A10	BnaA10g05760D	Oleosin genes	11.6128	10.0695	16.9918	959.507	918.327	977.512	1867.41	1871.71	1845.85	16.0157	17.5947	21.9905	1593.02	1501.42	1428.7	1813.07	1748.92	1798.75	10.047	10.0808	9.61282	2429.78	2442.61	2581.6	3079.23	3178.22	3139.36	11.2281	13.5488	11.8534	1740.66	1729.99	1729.78	2522.14	2642.45	2495.55	323.761	289.853	291.762	590.659	598.191	604.134	867.951	852.254	874.951	883.47	960.858
BnOLEO1-C01	BnaC01g17050D	Oleosin genes	37.1354	28.1857	37.4087	1198.94	1225.84	1278.7	3001.75	3369.56	2988.88	60.1948	50.0207	60.8882	1587.23	1562.88	1661.98	3386.48	3418.58	3484.23	60.5883	64.3968	66.1523	2341.75	2300.49	2324.13	3783.3	3818.87	3717.65	104.755	95.8668	104.11	2098.89	2091.67	1957.18	1916.98	1851.92	1907.78	544.516	535.976	541.17	923.465	906.378	954.962	1929.41	1889.72	1871.22	1109.83	1138.36
BnOLEO4-C02	BnaC02g37030D	Oleosin genes	38.2196	40.2238	49.1018	2032.4	2094.24	2049.89	5054.95	4620.02	4919.34	61.0255	62.198	58.9107	3146.77	3195.4	3043.05	5862.35	5875.51	5873.55	75.9069	70.4623	74.2789	2965.38	2871.14	2978.33	5607.27	5638.03	5615.19	211.237	208.672	212.446	3016.11	2993	3042.67	4836.36	4675.39	4764.71	876.386	862.982	884.693	1278.54	1251.91	1315.79	2951.2	2997	2884.23	2123.49	2168.31
BnOLEO7-C03	BnaC03g32430D	Oleosin genes	40.2761	35.8682	44.9012	2219.01	2252.64	2236.3	2117.97	2277.62	2096.21	56.1034	63.019	58.3688	2375.51	2350.78	2320.62	1987.33	1959.28	2007.27	25.4882	24.0036	25.6488	2482.37	2465.82	2475.63	2371.34	2384.24	2408.09	148.666	149.42	146.564	2186.95	2189.62	2158.7	1944.22	2047.4	2023.11	918.357	926.792	947.205	1520.29	1488.42	1526.3	1744.24	1728.36	1772.11	1798.46	1808.05
BnOLEO2-C04	BnaC04g32530D	Oleosin genes	5.10553	6.64053	11.1922	804.333	814.582	801.652	2994.4	2771.19	3015.53	9.806	9.93443	12.1336	1678.67	1711.92	1742.27	3581.37	3619.74	3478.86	31.1328	21.0735	23.0585	2148.39	2170.44	2193.09	4128.2	4178.48	4501.58	32.1878	29.4657	25.1795	2051.66	2031.76	2154.31	3042.44	3100.17	3085.68	321.257	333.538	323.685	761.391	749.54	758.89	1447.17	1448.97	1456.71	890.247	944.351
BnOLEO2-C06	BnaC06g12930D	Oleosin genes	17.765	17.0004	26.6508	1196.21	1227.66	1218.17	1487.79	1288.87	1437.81	28.0887	33.324	29.4572	1489.09	1572.77	1490.67	1558.29	1593.89	1600.8	177.665	194.602	204.14	1271.64	1320.3	1311.71	1731.78	1712.23	1582.48	196.988	184.53	184.057	1032.26	1067.13	974.615	1302.1	1336.05	1304.89	510.141	525.718	577.415	1027.51	1002.34	1021.44	1098.24	1156.95	1183.89	1060.81	1066.05
BnOLEO1-C07	BnaC07g39370D	Oleosin genes	70.688	65.0619	70.3313	2337.78	2386.75	2405.98	5616.86	6725.88	5801.66	63.4196	65.4552	66.2234	4087.35	4128.94	4192.6	6503.06	6745.7	6720.94	38.5864	33.8766	33.9184	4997.16	4991.76	5142.16	7965.69	8044.71	8092.72	99.3844	108.902	108.218	4686.61	4580.47	4765.6	5703.82	5603.08	5772.89	876.096	857.286	857.887	1864.63	1993.6	1968.34	3872.82	3881.39	3748.31	4189.11	4266.82
BnOLEO1-C08	BnaC08g11970D	Oleosin genes	435.662	361.327	385.329	5507.17	5556.78	5539.12	7659.13	9022.39	7914.01	686.994	714.953	706.651	5870.51	5970.94	6144.03	9174.3	9151.59	9256.13	520.233	509.458	529.926	4779.68	4783.18	4818.15	6766.92	6821.25	6641.89	999.91	1010.4	984.58	5484.55	5653.3	5673.62	6260.31	6429.38	6494.36	2635.09	2560.11	2617.55	5865.72	6041.72	6101.37	5013.28	5061.22	4875.55	223.097	224.27
BnOLEO3-C09	BnaC09g27370D	Oleosin genes	2.23453	3.19699	2.89541	339.611	352.813	354.876	1234.54	1246.01	1219	3.26536	3.87593	3.04509	848.127	790.035	840.982	1122.71	1055.84	1100.52	4.82374	5.21956	5.57811	1461.07	1503.63	1499.71	2158.58	2186.04	2134.02	4.8655	5.08373	5.57321	1059.28	1009.49	1068	1619.13	1803.6	1595.01	57.681	55.5021	58.5338	225.519	205.615	196.899	494.889	469.097	501.784	337.317	355.383
BnBGLU44-A01	BnaA01g27000D	Carbohydrate metabolism	155.413	172.872	175.812	21.8365	20.2341	19.0205	7.68826	7.7253	9.79064	254.09	258.806	271.273	24.9755	22.5594	27.1639	6.23538	8.67674	7.03612	201.612	201.546	213.7	20.5793	19.6248	20.8307	12.4743	10.9073	11.2593	306.747	307.624	306.933	22.819	22.1644	21.8657	15.7085	19.0792	17.0672	43.0523	48.514	45.4838	17.8116	16.9495	17.0092	15.586	15.6681	17.1961	74.7353	78.0608
BnCSY4-A03	BnaA03g20770D	Carbohydrate metabolism	17.436	19.9198	14.9736	16.5219	13.7265	18.2306	7.88973	6.22245	6.6468	21.4173	20.9531	17.251	10.9644	14.9639	10.9113	10.6816	9.98041	9.67938	19.4478	17.6567	16.9739	12.2599	13.5612	11.5549	14.3714	12.4818	12.8655	15.3234	13.9529	15.4134	13.6647	12.1034	11.8448	12.7446	14.8505	12.0096	15.4375	16.296	18.6183	16.2112	11.3933	13.8865	9.3755	9.22558	9.9985	10.0772	9.97667
BnBGAL8-A07	BnaA07g13930D	Carbohydrate metabolism	14.7673	15.0484	17.8444	5.11047	4.7201	5.71649	0.602448	1.45316	0.930587	13.7049	15.3444	13.3049	2.79036	3.45929	2.79612	0.656943	0.57205	0.896156	16.5062	15.8291	16.5289	1.85137	1.73894	1.29317	0.5208	0.615301	0.654583	8.82693	8.69793	9.93561	4.61858	4.04189	3.77353	2.2082	3.06176	1.77209	8.25728	9.28116	12.6398	7.51086	7.51485	7.68128	3.23267	3.69325	2.99955	8.77879	8.49614
BnmMDH1-A08	BnaA08g01250D	Carbohydrate metabolism	43.9269	30.9939	35.6904	37.2789	41.0811	42.3746	15.142	19.3518	15.4152	48.0182	51.8443	49.9436	25.8871	26.5674	19.7201	13.9218	14.8347	13.642	51.1161	51.3882	50.0675	22.3704	20.8463	22.7633	8.32905	7.59181	8.02433	53.3742	55.9005	54.2677	33.2451	34.7131	37.4914	18.6156	20.0592	20.9713	50.4475	48.1818	43.99	48.2503	50.0107	48.2934	28.7854	31.3752	27.3313	19.1463	20.4877
BnTGG2-A09	BnaA09g26590D	Carbohydrate metabolism	0.324333	0.723164	1.94602	255.514	263.504	260.465	213.137	224.172	218.84	0.517764	0.618214	0.977656	148.757	132.298	150.636	177.065	174.705	178.474	1.21594	0.708403	1.09575	247.401	254.093	242.559	198.08	207.017	195.17	5.22964	4.62985	3.1879	121.257	113.456	115.167	57.2905	61.6361	59.2253	274.371	268.516	279.266	407.037	383.927	403.658	216.211	208.757	218.561	355.46	366.427
BnSBPASE-A09	BnaA09g35380D	Carbohydrate metabolism	33.6667	33.2221	32.1157	55.8902	62.7994	53.6698	9.52161	6.86512	6.66448	36.3079	42.8537	40.7218	34.6839	30.2497	34.249	4.75883	4.52059	4.86875	78.7707	70.746	71.3247	20.0834	19.7117	19.2969	6.0705	4.96368	4.22777	56.4918	50.123	48.184	25.1306	24.5151	27.3015	12.0098	13.5843	18.1226	48.1437	42.3989	49.638	34.1133	34.0878	36.5748	13.1908	8.25333	9.59148	8.00875	9.89607
BnRCP1-A10	BnaA10g17210D	Carbohydrate metabolism	11.0349	12.2398	11.8133	7.8232	3.71487	4.02857	1.10669	1.01554	1.30882	9.53375	15.2966	11.327	3.92448	3.22073	2.21722	1.11461	0.885435	1.50047	7.87171	9.18281	8.53706	1.44282	0.794239	2.71248	0.167423	0.10989	0.161869	7.91544	6.09704	7.85257	1.88012	2.53802	3.11468	0.334059	0.333651	0.223403	8.68643	9.08403	8.09363	7.13573	4.9421	7.14288	3.17267	3.56832	2.25328	1.66854	1.95726
BnBGAL3-C01	BnaC01g02340D	Carbohydrate metabolism	1.63654	2.76943	2.68903	34.0476	35.6035	31.2582	86.2795	71.368	86.1394	2.40511	3.38105	3.57385	55.4503	59.1902	65.7952	98.9375	95.1631	89.7967	4.42442	4.10299	4.2541	77.4401	71.6866	72.885	115.922	114.622	115.535	5.65361	5.60489	5.35756	40.8065	42.0934	40.9932	48.0125	50.8886	49.7945	35.5429	36.1641	33.8066	42.436	44.0291	42.7052	46.2245	44.6971	43.6904	5.80208	8.46854
BnTPI-C04	BnaC04g25470D	Carbohydrate metabolism	120.985	125.239	136.373	88.9962	84.8653	96.6949	30.6835	29.4489	22.2655	127.24	126.302	123.492	59.2883	70.1833	74.2751	27.9968	20.339	24.3879	207.169	218.051	200.234	90.4001	77.0587	79.7614	26.2533	27.4209	29.944	225.569	218.948	227.877	82.5644	93.1385	83.9719	40.0087	39.8082	37.0877	114.545	94.8212	102.103	63.2069	71.9864	73.8847	38.3169	29.282	29.2788	57.1924	53.134
BnDET3-C05	BnaC05g09300D	Carbohydrate metabolism	22.5929	16.3969	17.537	12.6677	12.339	12.1854	9.71417	4.91661	11.4374	22.8703	18.092	21.8933	10.5758	8.28936	9.93853	8.69306	7.21879	7.77477	14.1004	18.1633	15.6966	11.2566	12.411	11.6893	8.32462	6.79401	5.87752	14.7541	17.2145	14.2304	11.5588	14.0779	12.1192	10.0535	8.45863	7.67335	18.055	18.2905	18.9653	17.3168	19.1146	17.7981	13.0895	15.5989	11.7718	13.3253	10.1277
BnBGAL1-C05	BnaC05g39570D	Carbohydrate metabolism	12.9474	15.7818	18.3509	11.037	10.07	9.4884	7.86274	6.63796	8.44274	18.6328	16.3549	19.4773	8.76306	9.00909	11.7508	7.33551	7.06505	7.44809	17.2496	18.2091	17.987	6.59473	6.6557	5.92111	8.30005	7.18282	7.48806	17.5668	16.8064	16.8855	5.36932	6.53333	4.11522	5.74893	5.18878	5.47592	12.2663	11.6221	11.5267	15.2748	16.7163	14.0351	12.8499	14.3201	11.5516	12.1543	9.9729
BnCIB22-C07	BnaC07g45190D	Carbohydrate metabolism	73.5839	62.8064	80.3691	78.6911	75.6649	82.4786	47.1454	34.5173	60.8599	55.6305	67.7076	56.9996	60.7013	68.8349	81.8002	51.0137	49.1472	49.7244	75.5511	67.7844	73.8327	56.0598	57.65	55.1568	41.5317	39.1955	44.702	76.3476	68.8355	77.4478	66.8441	70.0977	70.996	40.4041	45.2704	44.4343	74.9791	73.8407	74.0256	77.5553	69.3265	80.3045	42.1956	44.1476	51.6362	61.3881	65.1111
BnTGG2-C08	BnaC08g09960D	Carbohydrate metabolism	0.236308	0.450788	0.971386	50.8725	43.7363	40.09	330.339	348.908	336.125	0.406259	0.46244	0.45707	54.6612	60.5014	63.5041	284.307	256.59	271.327	0.560136	0.521875	0.579551	157.038	153.716	150.65	227.005	232.304	221.934	0.546042	0.463827	0.609705	87.3409	77.4165	64.7768	88.6909	96.2301	88.7799	13.4745	15.8135	14.8191	55.2126	49.7925	47.1305	99.3179	97.8753	102.663	72.8173	76.4151
BnOEE1-A02	BnaA02g34760D	Photosynthesis	192.445	175.018	151.653	359.591	362.854	365.925	27.9852	28.0907	29.9716	222.183	222.393	222.179	237.911	239.155	230.608	13.5807	14.2442	11.8136	328.696	319.212	338.882	146.918	150.865	141.917	10.2981	8.66422	11.8272	375.751	355.913	346.216	151.639	153.645	144.895	39.0411	32.5256	26.6085	433.776	412.967	421.669	285.436	281.555	309.423	82.1878	96.2115	95.0924	75.2847	72.4336
BnLHCB5-A03	BnaA03g24350D	Photosynthesis	57.7088	58.195	50.9698	147.041	131.812	130.918	14.3054	10.7183	12.7073	67.4508	68.9022	75.0126	102.654	95.5492	85.1671	5.13614	6.2083	4.39098	172.496	172.106	171.414	77.4373	90.0545	90.6657	10.3076	8.96216	10.8717	104.427	96.0212	104.233	64.5969	68.0261	68.3547	13.2884	14.1391	12.5931	105.734	113.896	110.212	92.0176	95.1856	80.9831	33.858	40.0732	33.5425	26.9122	29.0229
BnLHB1B1-A05	BnaA05g09400D	Photosynthesis	111.864	128.175	127.203	101.261	96.3195	111.01	3.24822	2.77205	4.28051	120.515	112.93	120.92	64.3401	72.4769	69.5713	2.09202	1.52931	1.74398	124.011	129.329	121.375	40.0188	44.0589	42.6799	0.81081	1.30627	1.99542	114.409	106.008	110.461	51.856	45.7646	50.1599	10.3687	9.18088	10.77	35.1314	36.339	40.8692	13.4431	16.2803	15.6255	5.90081	4.79869	5.51456	6.07942	7.20703
BnLHB1B2-A05	BnaA05g09410D	Photosynthesis	299.149	261.713	252.229	315.359	324.565	323.945	10.8247	15.0615	10.3775	275.022	297.584	280.282	212.377	206.681	214.281	4.00324	5.29861	5.32443	338.806	351.179	362.536	106.533	113.402	115.488	3.12285	3.6745	4.49208	251.529	219.424	224.8	121.584	115.063	121.04	29.7874	26.2598	24.3923	105.667	106.381	102.498	61.3026	60.6262	54.3034	14.581	13.7248	9.22595	43.9745	42.1742
BnPSAN-A06	BnaA06g23190D	Photosynthesis	77.9955	62.8056	74.1383	107.741	111.106	108.067	7.74296	6.36472	8.84394	77.4644	84.2262	72.853	97.4556	97.3337	109.375	2.18516	1.69137	2.55502	142.654	148.703	142.029	72.9378	64.913	67.8814	4.55352	3.60601	3.54113	77.265	80.4899	78.5301	54.045	50.1076	51.564	18.8626	17.8532	13.8693	91.0107	103.53	99.1262	76.8258	61.2598	63.349	13.667	17.6072	18.3383	11.8384	11.888
BnPUMP1-A07	BnaA07g16280D	Photosynthesis	18.4281	19.6754	21.7423	23.7484	22.014	24.681	4.89477	4.04249	5.10774	23.9585	19.5422	19.0847	17.9411	15.1541	11.8568	4.4643	6.53881	5.48091	24.983	23.2288	22.5173	14.2738	13.3759	16.5688	3.85493	3.02342	4.61146	20.3411	23.053	23.0121	23.6304	18.6684	20.536	12.3199	11.0027	7.912	18.3815	16.3808	14.1814	16.6438	14.7715	18.0974	7.12572	10.2543	6.90556	16.9751	20.7624
BnLHCA1-A07	BnaA07g16530D	Photosynthesis	75.6555	62.4178	71.6603	125.238	124.27	111.485	5.1357	5.30726	7.28844	62.62	65.504	58.7943	85.0159	85.6682	89.6386	2.48781	1.66303	1.61972	115.053	105.351	107.628	54.6048	45.3806	50.3166	1.86466	0.917922	4.29902	167.295	173.339	177.866	78.5242	71.8258	100.768	20.3916	22.2247	20.6707	84.8654	88.3587	94.1048	48.8359	55.2915	54.9321	22.8821	17.5921	23.9319	38.8179	45.0461
BnCAB1-A08	BnaA08g17660D	Photosynthesis	272.988	271.667	291.011	442.186	472.741	466.006	20.8193	21.2175	20.1113	363.052	376.152	360.862	272.07	252.418	280.267	3.50554	5.60763	4.70232	362.079	322.544	342.313	114.67	112.365	116.125	2.44558	1.75111	3.29592	909.577	893.859	902.471	239.753	254.824	237.57	25.6553	22.6701	22.3981	558.693	613.615	636.238	319.604	323.583	309.233	130.606	147.323	155.33	59.6711	73.9563
BnCLPP6-A08	BnaA08g25160D	Photosynthesis	15.0055	22.0145	23.3233	23.5537	26.4117	25.6434	5.69823	8.93934	4.58936	31.1158	32.3887	26.7605	16.292	12.3442	15.8247	6.85206	6.65839	6.78174	48.1633	44.7612	45.6592	10.1665	11.0144	9.28317	12.3284	12.4867	11.577	31.2227	35.6583	32.3553	18.1131	18.633	19.425	15.4097	9.81343	13.6852	24.3169	25.7174	27.0522	22.9648	17.8638	14.6656	4.68564	7.00141	9.92852	10.0805	10.3162
BnPSBQ-A09	BnaA09g19870D	Photosynthesis	306.764	230.16	239.936	576.48	576.832	570.562	35.1828	48.8631	40.3731	282.733	312.196	304.296	451.592	427.547	439.913	17.2563	19.3783	20.5491	561.462	552.107	562.469	316.456	332.819	323.026	23.8618	22.6981	23.9376	408.829	416.601	433.109	293.592	285.753	284.673	62.7363	61.9444	59.5211	563.798	576.688	577.123	380.202	399.444	386.158	143.003	141.621	141.257	125.501	130.422
BnLHCB5-C03	BnaC03g28960D	Photosynthesis	60.7749	81.3586	66.5775	166.596	160.801	185.273	13.5316	9.98745	17.8691	85.9816	82.8688	70.4232	114.72	103.092	106.794	5.09469	3.40321	3.78432	142.897	145.811	137.927	64.1962	65.2695	69.099	5.97533	6.27517	7.57446	123.129	126.282	116.517	82.5614	66.033	80.0244	16.7579	17.4651	19.003	133.828	137.199	128.121	100.883	100.02	105.358	39.9782	40.8303	35.5582	23.2725	22.7205
BnCAB1-C03	BnaC03g59520D	Photosynthesis	849.135	744.405	705.09	965.79	988.517	992.628	34.0347	35.1798	36.3723	1086.73	1029.12	1046.81	552.386	523.156	540.617	5.59107	6.13573	4.93662	1061.7	1070.06	1126.75	188.937	192.951	190.387	3.42448	3.8737	5.63556	1321.74	1272.58	1272.15	217.092	219.777	215.594	17.1549	16.4805	20.7086	1946.25	1968.95	1905.92	882.735	875.237	898.974	324.95	314.676	303.962	115.681	126.529
BnLHB1B1-C04	BnaC04g10770D	Photosynthesis	117.289	103.713	97.557	170.158	153.026	156.689	5.96743	5.25692	4.75866	93.5305	98.0756	103.756	91.9816	111.042	102.056	1.7461	2.02729	1.24274	118.561	127.026	126.607	34.076	34.7884	42.1996	1.08332	0.924369	1.606	103.208	108.2	112.656	46.5867	40.7706	46.5305	6.77289	4.67765	3.68615	42.9402	52.2255	43.179	31.8554	34.9128	38.4915	14.2447	12.2582	15.7808	8.48824	9.21065
BnLHB1B1-C04	BnaC04g10780D	Photosynthesis	811.992	838.228	817.658	968.095	949.949	985.568	62.4789	56.794	70.3891	1001.02	989.675	970.997	651.282	612.794	612.804	26.5608	23.5568	26.6459	1296.43	1319.94	1323.35	302.403	306.508	320.823	15.0904	14.7881	17.3043	1346.69	1282.71	1299.88	406.779	417.529	399.149	74.8549	81.1976	84.8528	1178.51	1157.45	1154.06	641.222	664.702	633.263	277.034	271.145	258.219	203.192	206.551
BnSIGC-C04	BnaC04g26820D	Photosynthesis	34.8944	44.2194	29.747	43.1216	42.6165	43.5062	12.7121	11.0631	12.0964	50.0347	42.6705	43.4232	40.966	37.4909	38.5292	11.6598	13.7191	12.6897	27.9588	31.5118	28.0771	15.2046	14.425	17.6195	9.11936	8.94177	12.4156	59.733	73.2642	80.2321	46.1023	55.4569	55.5065	21.7608	22.8098	23.8032	31.5948	28.3787	28.6068	40.7677	47.5044	50.1717	20.2538	17.5684	13.7468	16.7697	17.6431
BnCAB3-C05	BnaC05g22880D	Photosynthesis	668.349	597.954	628.706	1278.94	1274.47	1287.04	73.2129	60.2866	62.8862	923.353	887.299	846.635	929.445	915.98	878.084	18.4686	21.0838	18.579	1379.51	1383.21	1376.27	465.159	464.437	473.968	15.7317	17.8045	21.6065	1738.03	1643.32	1686.04	467.419	499.154	469.663	55.3716	59.3326	49.7328	1696.36	1675.43	1651.27	921.736	947.239	970.077	432.334	455.422	428.808	257.228	254.617
BnLHCA1-C06	BnaC06g15470D	Photosynthesis	114.595	81.5495	98.0175	208.066	222.744	210.021	14.6758	12.965	10.6743	111.168	103.749	109.584	150.794	157.347	161.062	6.48723	8.72598	6.4752	144.654	143.215	146.426	63.529	66.4904	60.9138	5.56932	2.74162	3.27441	91.5735	91.996	85.3034	35.5716	40.7007	38.5405	9.68589	9.67404	8.28513	134.242	147.429	143.008	85.2653	81.7814	85.4908	38.5075	33.9477	39.0567	13.9665	23.0359
BnFER3-C06	BnaC06g15730D	Photosynthesis	48.7594	44.8163	44.5168	13.4576	18.573	8.72687	0.267594	0.982224	1.26588	63.2893	71.6367	55.0148	9.30856	6.25952	8.34608	1.44684	1.18576	1.30611	92.6685	97.6739	99.3684	9.62882	8.775	13.0034	3.48149	1.59427	2.19182	62.1849	56.6983	61.7147	21.5004	21.6125	18.7884	2.42325	5.728	4.61857	31.388	26.661	27.9575	14.2847	20.4132	16.1109	10.333	9.13013	11.5378	1.25209	1.11862
BnPSBB-C08	BnaC08g26690D	Photosynthesis	46.9589	38.9479	40.796	18.6569	21.4979	20.9193	6.00583	9.17986	7.36022	50.5449	52.5222	43.0089	14.1681	15.2389	18.5221	5.38834	8.54	10.2381	84.623	78.3868	89.4161	20.7202	21.7342	23.4703	12.2048	16.5022	15.7333	62.8554	65.9408	67.0771	39.2629	33.5443	38.4797	14.449	12.8909	15.6342	21.1599	22.3781	30.9856	20.8879	23.5659	28.0691	17.2753	19.0127	14.7834	8.80794	9.33911
BnATPD-C09	BnaC09g25660D	Photosynthesis	24.4168	15.7301	20.7679	24.1623	21.6107	25.9876	2.47551	3.31856	3.16404	28.912	28.0866	20.0013	18.4295	14.8933	9.44138	2.46471	3.57701	4.3078	37.4389	37.2315	36.4175	11.366	10.3745	10.6324	1.66084	2.30847	2.64477	34.8597	30.4455	28.3367	11.9069	12.3632	14.1575	7.01763	3.30983	5.57301	26.6348	28.2406	29.6867	21.788	25.5477	27.8416	8.27442	12.2662	9.16536	5.23754	5.08764
BnPPD5-C09	BnaC09g45140D	Photosynthesis	19.1468	10.0601	17.2373	13.7752	12.6363	13.6041	1.64063	1.97867	2.53425	18.0493	21.2101	13.8298	7.36146	7.02683	13.6301	3.13081	3.80807	2.74554	29.8267	36.2147	33.6661	10.2669	10.7134	8.54188	2.97839	5.72508	4.73078	23.4688	22.2263	22.2826	10.5399	5.39843	11.8039	5.30607	4.31033	4.68395	20.1559	20.5651	16.5811	14.2687	12.1904	13.9691	6.82884	7.17233	6.23173	6.79925	8.51634
BnMYB73-A01	BnaA01g00670D	Transcription factor	24.2795	49.1689	43.5349	12.86	10.1671	15.3494	4.25349	3.53676	5.54366	48.0635	46.0783	34.8353	7.38785	14.414	15.5676	4.80389	6.25063	4.83012	37.2918	31.9759	34.8437	2.75006	3.70914	4.32922	4.88519	4.80969	3.58046	36.6898	38.1022	35.4372	7.02662	9.42582	4.70614	6.28868	5.65289	5.3621	55.6839	58.8206	50.9949	47.4061	43.9181	44.0425	26.2366	15.5721	32.7493	17.3028	14.0683
BnbZIP28-A01	BnaA01g31420D	Transcription factor	10.6917	11.5621	11.0075	10.9498	11.8627	10.5335	19.544	15.1337	19.5855	27.7115	25.2045	23.3749	32.2795	37.0905	36.8365	31.5482	29.5598	27.4419	16.2095	13.8123	15.2046	27.1729	29.9295	30.7699	24.4229	25.3215	26.0407	15.9694	16.9743	16.8173	24.3202	29.4315	26.5706	26.3456	29.0577	23.8744	10.8072	11.3289	11.5082	15.4961	14.0094	11.2589	14.7083	14.0786	16.257	53.6156	47.6939
BnbZIP25-A03	BnaA03g18190D	Transcription factor	95.3333	101.62	84.116	11.7152	12.965	8.42513	3.56949	4.51293	5.22654	72.63	92.3539	80.7449	10.8497	6.7294	7.1514	4.85645	4.97946	4.06524	48.9941	47.4196	59.1851	4.80876	6.17442	5.51555	0.600003	0.886094	0.754132	36.0208	43.1992	36.7224	5.29124	6.28786	8.34232	3.831	5.26119	4.5035	34.1077	36.8769	37.5297	23.5507	21.3161	23.3985	11.7646	12.2765	9.83278	11.815	10.394
BnABI4-A03	BnaA03g18970D	Transcription factor	17.207	18.53	23.065	7.54456	9.48606	10.6636	1.82774	2.51581	1.92997	28.8069	21.7863	25.6203	6.1728	12.4198	8.1649	3.4152	2.53096	2.60198	48.5754	55.9877	49.1653	12.9569	11.0487	13.5124	6.91264	6.53356	8.95569	34.4699	32.437	17.9018	14.4524	12.4382	9.61119	3.10338	1.10208	1.45278	21.2517	25.5433	22.9148	14.6627	16.9963	19.2849	11.1479	10.1256	5.17164	4.13349	6.0242
BnEBP-A03	BnaA03g34290D	Transcription factor	46.541	53.6272	49.4058	2.18122	1.69971	2.25671	0.799971	1.25844	1.15847	35.3525	39.5467	51.7199	1.0421	0.338863	0.445546	2.72604	1.01281	3.12369	0.0881424	0.70751	0	1.20684	0	0	4.87546	4.69797	5.41579	10.2713	11.5187	11.0142	1.74735	0	1.42197	1.13839	4.96143	1.97245	4.61315	4.07571	4.19599	2.1592	2.16146	5.49748	1.08317	0.60297	0.492744	14.1168	10.0323
BnAPRR2-A03	BnaA03g43540D	Transcription factor	21.9443	24.7117	20.5559	7.71684	6.39706	6.17702	1.29592	1.67307	1.22307	14.5587	17.3469	20.2238	4.2107	6.31603	5.96703	0.810124	0.445539	1.00333	38.7397	41.4982	41.4376	6.55422	5.32867	4.58588	0.811246	0.718837	1.09807	42.9857	43.552	45.2043	7.19432	7.53918	5.75885	2.63036	2.26339	2.43562	11.7643	13.2809	14.2064	7.92035	8.8322	7.74687	5.08256	5.13993	4.67238	4.47458	6.16454
BnDEAR3-A04	BnaA04g13590D	Transcription factor	35.9315	42.1415	34.842	7.84449	5.79441	5.70269	6.11361	5.54411	4.98217	32.6703	34.9733	36.1995	3.52221	9.24164	6.30924	3.31697	4.9135	5.49996	19.9706	16.327	19.1322	2.25049	1.1912	1.60958	0.32643	0.964154	0.946808	22.6157	20.4623	24.9851	2.37195	1.93636	2.55697	4.01652	4.12003	3.7024	14.3064	11.9094	10.8423	8.19668	8.7289	10.7715	7.32205	4.80685	5.55624	10.2084	12.4892
BnbZIP12-A04	BnaA04g23690D	Transcription factor	3.79309	5.43069	2.91664	27.5437	25.9656	33.4154	42.1175	40.0882	46.7675	1.09948	4.00175	1.66742	44.4878	44.2122	48.0338	41.6645	41.7775	43.0995	4.10719	4.04607	2.7429	62.7676	59.7477	63.9809	93.6854	98.078	90.5355	4.15504	4.48596	4.70368	39.3176	36.6232	30.0751	42.4365	46.6756	49.2537	28.2931	26.6788	25.925	32.4487	32.4129	36.338	40.8879	47.9177	50.1478	30.9875	29.0014
BnPHAN-A05	BnaA05g06890D	Transcription factor	8.17599	8.53727	8.54114	7.69679	9.75184	9.52985	2.02232	4.17548	2.05002	5.64224	5.4289	7.23885	10.6932	8.55752	6.28284	2.1105	2.7304	1.60401	10.7721	11.7865	9.78384	6.82209	8.66634	5.03079	1.77829	1.46842	1.442	18.9846	19.6746	18.0745	6.30926	6.06833	4.54959	2.23195	1.71479	2.87043	6.9877	6.76158	7.30069	4.94671	8.24746	7.34213	2.79529	1.1337	2.38426	4.43556	2.92634
BnABI5-A05	BnaA05g08020D	Transcription factor	0.938249	1.17514	0.885025	2.39198	3.03143	2.36226	11.9575	13.1673	12.0633	0.940936	0.927321	1.6498	3.82585	2.94052	4.96295	24.8929	26.8099	24.7418	0.397142	0.221376	0.684846	1.67828	0.909642	1.42667	19.5784	20.1961	21.5399	0.509581	0.604567	1.07591	2.36705	1.38625	2.0848	14.4032	14.8513	13.201	2.86176	4.17802	3.17658	6.48577	7.9534	4.62164	13.6772	19.1383	15.6644	1.33851	1.15904
BnGRF5-A05	BnaA05g25480D	Transcription factor	17.5073	20.1132	21.9622	12.0107	11.5516	10.5013	1.87919	2.13606	3.7484	29.4338	30.3601	22.627	4.23786	5.81175	5.14024	1.9087	1.07446	0.591755	63.0241	64.7372	65.3054	18.2087	14.999	17.9649	1.70573	1.51685	1.70235	61.0597	64.0066	60.6082	17.5557	14.4158	15.3008	1.37236	1.69965	2.58811	79.0479	81.38	87.1822	56.2294	58.3575	56.5054	13.3423	10.9384	11.6962	2.32584	2.39759
BnKHZ1-A05	BnaA05g26890D	Transcription factor	6.82716	8.38646	8.77009	7.94584	7.40109	4.41402	5.62017	5.50113	7.20055	11.1259	15.0557	14.8808	9.64865	6.40357	3.65186	4.6177	4.23716	4.64816	8.91021	11.2356	10.5272	5.22061	5.50721	6.51319	5.03056	6.83628	9.11089	7.83727	8.18491	10.9482	7.02057	4.13289	4.30126	1.76717	1.90621	1.98542	10.0008	8.21895	11.0446	9.48086	9.07953	11.9733	7.645	3.54189	6.89948	3.57932	5.04516
BnNAC50-A05	BnaA05g28370D	Transcription factor	33.5102	25.1737	24.5177	16.0729	16.9114	15.6197	17.0064	17.9181	18.6138	30.2655	21.8408	25.0267	15.5705	16.8089	16.5755	14.232	15.1468	13.0716	30.983	27.1521	29.4419	15.2476	17.4607	17.3401	11.0775	12.7239	11.4042	50.3227	47.5786	49.5833	13.3138	11.256	12.7043	11.5631	10.067	9.85425	24.1456	18.3747	23.5779	24.8571	20.6775	22.7688	19.3377	18.6015	20.3412	12.6895	10.6283
BnCDC5-A06	BnaA06g05660D	Transcription factor	37.1675	67.1974	61.9738	31.8217	29.088	32.156	21.0698	15.3185	20.9147	59.0752	69.0864	62.3496	25.6236	25.9851	26.1728	18.6124	16.3111	18.4015	38.7941	37.473	41.8352	19.7339	24.4163	22.8762	18.6427	16.0637	17.1464	35.3863	36.8448	43.0128	28.4536	25.8372	28.4504	21.0335	22.2235	22.0364	56.3737	64.663	59.1807	56.3632	50.2268	58.0805	44.0489	34.9998	36.2913	25.5389	24.6079
BnNAC062-A06	BnaA06g15870D	Transcription factor	12.9123	18.4897	18.1614	6.71274	5.93775	9.54091	4.64105	3.2422	5.96929	8.67627	14.2763	13.6708	7.12923	9.5689	5.64219	4.52349	3.09587	3.1178	22.8243	23.9051	22.0225	8.84179	8.13268	7.1793	2.76315	2.58665	3.85397	27.5982	33.5464	28.8577	8.97674	8.46409	9.26971	4.02202	5.59686	7.11722	7.48847	10.17	9.60829	6.24087	7.69241	6.93005	8.82918	6.58253	5.11025	15.271	14.9238
BnLEC1-A07	BnaA07g10770D	Transcription factor	150.246	153.448	149.301	21.1222	25.7537	24.2302	3.95788	5.36406	5.34944	124.382	139.239	126.486	7.8145	8.62628	11.6717	1.35563	2.13606	0.891609	180.026	163.51	170.717	6.43015	7.46253	4.47727	0.368467	0.362772	0.0890615	118.985	116.807	110.849	24.3705	24.4072	25.1645	4.96263	8.62809	7.09849	76.1426	86.26	71.5232	32.8698	35.1253	33.8046	12.3975	10.2806	8.20435	6.268	4.89498
BnMYB44-A07	BnaA07g11930D	Transcription factor	11.5592	13.0913	8.22155	11.7667	10.8311	8.36682	11.0477	9.21906	9.88658	14.0595	8.81326	11.8911	10.6687	13.5639	12.1137	10.9529	10.1351	9.52078	37.4115	31.7931	32.5783	14.6845	12.7792	11.3407	9.16615	10.2586	9.01361	36.8296	36.762	34.0173	14.5163	14.4839	15.4185	9.92623	9.99215	8.62442	13.1787	11.5063	10.7436	8.69711	7.4275	7.91212	8.90766	8.74341	10.606	6.54232	4.57937
BnCRF11-A07	BnaA07g24590D	Transcription factor	31.285	38.2598	42.2654	13.323	11.7442	14.1025	9.07063	6.42106	8.29178	21.5013	29.6663	21.5373	15.1803	12.4874	12.393	9.35021	8.25408	9.56618	21.1128	19.2408	20.035	9.12263	11.5888	12.2725	7.7188	5.64534	5.757	40.5916	45.028	48.6729	29.5734	22.5302	19.6503	20.1685	19.338	19.2752	21.6762	23.1754	26.6896	19.0176	24.355	20.3615	8.95542	9.99895	8.72981	19.0988	17.6568
BnARF8-A07	BnaA07g25390D	Transcription factor	8.64257	6.28139	6.19858	6.75232	6.906	5.48356	5.67943	3.75241	4.60577	10.1219	7.93651	11.0657	7.24734	4.82455	4.18906	4.3938	3.63897	2.9669	8.87919	7.38856	8.52549	3.74624	4.94202	4.47542	3.00953	3.45685	3.85266	27.5671	27.8986	29.732	11.6244	10.3863	10.0953	9.59119	10.8567	9.03557	11.5033	9.17599	11.3817	7.62323	7.5773	5.60068	5.59315	5.47481	5.42703	2.70052	2.48769
BnCIL1-A07	BnaA07g27570D	Transcription factor	9.04527	10.3546	14.4938	5.91194	7.5013	4.69715	7.38501	4.79313	4.41236	9.72869	9.59169	6.3855	6.24359	4.97895	6.10155	4.80649	3.35913	3.77168	9.84517	11.6571	10.4596	6.54197	6.65811	6.42617	5.01642	4.63293	3.43365	20.9486	23.3356	24.0278	10.2051	13.2985	12.7359	11.0722	12.2972	10.0406	5.96557	8.22274	8.3653	7.48031	7.58506	7.72387	4.32644	3.14813	3.32124	2.65454	2.50054
BnBIM2-A07	BnaA07g27640D	Transcription factor	7.66825	7.45166	8.44755	4.41841	4.24919	3.3215	3.84559	1.19849	4.85443	5.73925	6.99745	6.91619	3.52873	4.08779	3.11168	3.5308	1.84874	2.90406	12.9273	13.6446	9.72755	1.36219	2.37934	1.94851	1.90997	1.23202	1.14618	27.6128	28.3687	30.3031	9.20156	9.44148	9.41513	8.01618	10.1064	8.8322	13.4348	11.5214	11.2411	8.22535	6.31271	9.02234	3.36215	4.44083	3.59774	5.22835	5.52965
BnHB33-A07	BnaA07g31990D	Transcription factor	55.4462	53.3586	45.9027	5.61725	6.15546	6.22676	2.27036	1.25003	0.95894	70.3314	78.2992	67.2363	1.66133	1.87	2.70459	1.32383	0.838369	0.554076	53.0672	51.7815	54.1014	11.0998	10.9043	10.4035	3.26294	3.83246	3.81886	187.458	178.855	184.024	38.1169	40.6918	43.1589	12.1073	13.1193	13.2337	24.7933	26.0795	24.3978	11.121	7.39529	13.566	2.92229	2.52886	0.543836	1.00329	1.15592
BnAGL67-A07	BnaA07g33810D	Transcription factor	0	0	0	0.627389	0.641668	0.973651	3.55007	3.1491	4.69828	0.077229	0	0	2.49783	3.99618	3.17178	3.76366	3.2773	2.69542	0.0760576	0.0763133	0.236082	27.0757	33.2192	29.8867	196.029	204.455	193.421	0.159695	0.240471	0.0772692	20.8428	26.9025	25.2414	76.5306	86.0697	94.4173	0.692289	1.25604	0.794787	2.0406	2.89092	2.23762	4.36175	7.28419	7.22816	7.75176	10.3692
BnbZIP60-A08	BnaA08g04620D	Transcription factor	58.0459	61.9469	56.4025	60.0201	57.4481	63.9718	72.9322	67.9623	75.2782	51.5224	40.9293	52.4971	70.4433	67.4875	69.6272	98.755	94.4133	102.009	205.078	193.104	187.66	36.7448	31.614	38.5592	17.4926	20.4143	21.5779	573.451	573.919	573.485	134.478	123.966	125.431	103.581	110.516	103.452	65.8227	68.8417	71.4118	99.1728	111.939	95.2225	114.597	119.824	116.848	44.5416	48.8808
BnHB6-A09	BnaA09g42630D	Transcription factor	14.7823	11	11.8649	6.11319	5.81356	5.61359	0.885013	0.97455	3.28949	10.1655	8.65451	11.9567	2.80961	1.74947	2.70279	0.506661	1.24186	0.921536	11.4675	9.90796	9.08705	3.87682	1.75888	3.05569	0.696214	0.474545	0.776678	24.7943	27.2404	23.1154	8.4905	11.5954	7.7608	2.83175	3.0951	3.10859	13.3062	13.9277	16.0094	11.6782	12.9446	13.1736	6.39989	8.46733	7.37737	9.828	12.4079
BnHSFB4-A10	BnaA10g05440D	Transcription factor	10.5581	6.257	9.84227	12.1997	10.3849	9.5787	1.33395	1.28529	0.929651	12.2751	10.0673	6.27742	8.53161	9.31162	5.28189	1.11369	1.10831	1.46496	11.1887	11.5489	12.3749	7.82599	7.9533	5.5173	0.151353	0.819575	1.17066	13.8388	13.0115	11.3016	2.9994	5.23724	5.77964	0.905986	1.28191	0.833086	20.1926	16.9198	17.9187	9.07616	6.78046	10.0643	1.66821	2.90324	3.05551	2.10654	1.28684
BnREV-A10	BnaA10g13520D	Transcription factor	10.5643	10.2072	13.9278	4.62614	6.32724	6.40696	5.6622	4.74262	6.04505	11.3926	10.7395	10.3977	6.49975	4.85223	6.81038	3.39098	3.57003	3.46931	8.71099	8.32074	8.31593	7.98666	7.54195	7.22145	7.2446	6.75581	6.84571	8.60851	8.86223	8.51936	5.5802	5.91911	5.54095	6.87303	6.18361	6.81246	11.259	11.0737	12.0022	7.53302	7.46225	8.47424	5.45548	5.11685	4.12303	4.19953	4.18382
BnWRKY11-C01	BnaC01g06900D	Transcription factor	16.185	11.8999	10.3976	6.02687	5.25085	5.43763	0.491194	2.07341	1.82571	11.6686	9.42098	18.7543	5.1426	3.803	4.54813	2.18714	1.08829	2.47741	28.3503	26.6083	27.4384	6.53191	8.78581	8.87233	2.45221	2.34114	2.08349	13.1911	11.4456	13.5349	3.387	3.37944	3.27417	1.85337	1.70302	1.04114	7.3995	4.10139	7.18459	6.40793	4.56767	7.0589	2.50021	2.24608	3.26504	0	0.0789742
BnMYB118-C02	BnaC02g37090D	Transcription factor	50.6355	48.2466	45.0609	6.04481	5.32223	5.13916	1.15667	1.21001	2.98991	39.3593	39.9325	31.9178	6.91436	5.31606	6.98969	1.10364	0.448477	1.41141	3.25621	3.44618	2.81525	1.15361	0.804571	0.443739	0.157486	0.0516841	0	8.42906	12.6926	7.15995	2.18467	0.778496	1.69621	3.08996	3.66157	2.10144	16.9508	13.7995	14.2943	9.522	7.65684	9.08109	2.92347	0.976449	3.36635	10.3371	7.58757
BnbZIP25-C03	BnaC03g21720D	Transcription factor	117.425	109.521	105.533	25.0222	23.5968	24.7114	4.84398	5.06397	3.60504	69.6769	72.0028	79.4179	18.5753	11.7572	16.6141	3.21776	2.85289	3.11252	84.9357	84.1298	87.8797	19.2814	18.7055	18.5243	0.667878	1.64389	1.82956	71.0958	78.6981	69.3288	18.0334	16.2874	18.4195	5.55259	6.87679	9.19044	49.879	44.7766	48.8696	38.4507	41.5173	34.3934	18.0805	19.9285	17.9775	13.7139	13.9004
BnOXS2-C03	BnaC03g23530D	Transcription factor	18.0589	15.8878	23.8532	12.5619	13.9634	12.5545	6.37274	5.01248	6.66975	17.8892	14.9235	14.0873	9.4336	10.3479	9.67993	3.98789	6.55545	4.88793	18.9264	18.3496	18.2285	5.29251	6.86717	6.66764	2.66689	2.99548	3.34107	21.0757	19.4756	20.1682	9.04413	10.5094	6.9511	8.13178	4.82819	7.36781	19.4277	21.2588	17.8989	15.5252	15.3011	15.2866	12.4637	13.0128	11.0176	10.4945	12.6945
BnAFO-C03	BnaC03g25170D	Transcription factor	18.5664	15.0573	23.4232	20.7007	18.0518	21.3044	8.87073	9.76819	11.4225	19.2455	17.5838	15.7472	18.7042	14.5734	20.4466	4.57514	4.38231	4.5638	44.1941	50.6508	52.1352	18.5665	12.1502	13.7964	4.02597	4.71364	4.94444	33.1956	32.7397	38.6988	19.7303	14.953	12.0391	7.38171	8.13163	6.86034	54.7009	53.1344	48.3075	33.326	30.3811	23.2838	12.7505	27.4496	19.7699	16.0417	15.3802
BnASIL2-C03	BnaC03g38340D	Transcription factor	29.1208	41.233	41.8819	18.5241	15.3103	11.5434	8.27285	6.54251	5.94654	37.4599	33.644	35.422	11.9633	11.5962	10.0424	10.6922	8.58146	8.6632	24.7685	31.7776	32.6489	8.82454	7.69761	8.22289	7.78231	10.6865	11.7483	28.7429	30.1381	26.5184	9.33462	8.70637	11.831	8.64941	8.36674	7.24178	32.8666	36.5927	34.4158	28.622	24.9638	26.6219	16.5534	15.3168	20.1048	8.23446	8.92382
BnERF4-C03	BnaC03g39000D	Transcription factor	3.4083	3.177	8.75651	29.6658	23.0383	30.8923	22.2589	13.9032	17.1598	8.05684	4.69919	5.39376	25.2056	24.034	14.4025	26.2355	24.3475	24.6504	3.67879	5.71767	5.22433	22.2767	28.3453	24.4876	14.8561	16.8831	13.6247	9.01154	6.15769	8.28088	43.4041	41.0411	41.3113	19.8181	18.7788	15.2074	20.0253	24.7775	21.6082	20.1104	17.2465	18.9296	14.3799	17.7643	12.5006	28.7944	28.2393
BnGATA1-C03	BnaC03g43410D	Transcription factor	39.7898	46.0025	50.5493	23.7463	18.7304	20.7687	15.7148	4.03422	9.77302	31.334	48.5198	49.192	18.3641	19.3439	16.3503	7.91109	10.1463	5.45863	20.0024	20.2935	19.4648	6.56114	5.65236	6.19518	4.02551	5.77262	3.72277	23.7313	28.4469	22.1341	4.76913	7.87314	6.76917	7.24636	6.53991	7.0063	39.9325	34.2196	38.0745	28.1904	28.2634	29.7517	26.6011	15.7689	17.5628	12.3603	13.1137
BnPHL2-C03	BnaC03g43430D	Transcription factor	51.7947	45.8575	39.3293	16.7637	15.4382	20.0673	7.02646	11.6939	7.12268	29.3274	26.2715	40.7405	13.0247	22.8865	12.6852	7.61851	9.55298	8.10627	33.2549	36.1473	32.6872	11.8984	15.3926	13.6311	11.7411	14.0571	11.8422	35.817	32.581	32.7836	17.379	19.9914	13.6252	10.7013	10.1827	10.6622	23.0522	18.9841	26.5278	21.7667	23.4831	23.988	13.2017	17.8624	12.0494	15.4672	9.78229
BnHB25-C03	BnaC03g49000D	Transcription factor	67.822	67.3561	63.318	20.1716	21.3183	18.1779	8.41521	8.35011	13.8737	79.5193	78.5399	77.1835	11.7118	11.9735	12.8889	10.147	10.5517	10.5619	126.242	135.898	136.817	12.5867	18.1028	14.4567	10.6603	11.2393	11.7675	124.146	112	115.356	27.9459	33.9415	30.9028	12.3938	11.2077	9.32446	54.1268	57.5579	50.3502	30.6174	29.3835	32.1465	9.15437	11.5148	9.76865	4.9327	4.1036
BnARF2-C03	BnaC03g52090D	Transcription factor	13.118	15.7524	18.3029	6.68615	6.79333	6.51621	3.70245	2.53149	3.55691	13.5693	14.9437	16.6698	3.89838	4.71184	4.59926	2.12423	1.84973	1.8662	27.9028	24.9254	27.0547	9.00091	7.76705	7.56611	2.89943	3.93591	3.14305	18.0853	19.9454	20.3076	7.31294	6.88401	7.03286	5.08401	5.62496	4.72621	18.4323	19.603	20.4571	13.7816	12.3347	12.146	5.78497	5.18374	5.99944	4.55177	4.41207
BnDPBF2-C03	BnaC03g54810D	Transcription factor	49.1882	41.7373	57.2324	43.6621	48.1894	42.0319	66.2198	57.9351	63.385	35.5946	34.8244	35.9204	70.8329	80.7517	82.3692	59.3463	60.0537	62.3843	24.0497	28.0954	28.6201	112.347	107.244	101.553	208.476	210.719	198.419	40.0577	40.3474	38.9802	105.342	108.37	93.8135	93.1426	104.489	92.8335	54.1458	49.2126	54.5155	41.189	44.6483	41.2524	45.5439	44.4146	49.8231	51.5034	53.2518
BnCOL3-C04	BnaC04g37230D	Transcription factor	34.7413	36.3414	39.5007	28.8322	25.4158	27.8187	8.60007	5.53914	5.59258	35.3279	40.8971	34.0534	26.7159	23.8166	24.1977	6.11561	3.50528	5.38566	35.9184	35.4113	37.1634	21.2291	17.4143	19.1421	3.31398	2.10267	2.84805	13.0073	15.2341	11.443	13.8645	10.8484	13.6284	2.05719	2.12806	3.53765	24.1357	23.4235	25.0663	22.1905	15.6519	19.1461	10.5094	7.36282	13.9052	11.1609	11.8966
BnAFO-C04	BnaC04g50150D	Transcription factor	41.2103	28.5491	41.1133	20.0842	21.8762	26.2077	13.0832	15.6367	13.0198	44.8582	46.161	44.4748	16.8122	18.9238	13.9181	10.1998	10.6051	10.5133	90.8168	95.6288	95.4926	14.696	16.806	15.8379	13.179	11.4782	11.9718	52.128	55.3779	66.5722	20.9512	22.3363	21.9087	13.2926	11.0396	13.4791	43.2636	43.9636	41.9357	28.3508	23.0852	24.8357	18.735	18.2675	22.5298	19.1116	15.7764
BnbZIP12-C04	BnaC04g56840D	Transcription factor	4.34966	7.40852	9.37039	34.2486	29.1637	39.792	55.7563	45.8132	41.1368	7.67822	6.28729	6.14599	55.6278	50.727	54.1776	55.2335	56.6668	53.5132	8.74534	8.77474	6.87139	66.1222	63.0297	66.2306	101.607	107.807	104.446	9.87139	11.157	9.88667	62.416	49.8826	52.2819	74.1153	70.015	79.0714	29.1024	25.8441	26.2633	32.3687	41.5207	39.309	63.1174	54.7877	63.9603	44.4384	54.5272
BnAF1-C05	BnaC05g00370D	Transcription factor	10.0498	7.34728	7.68941	24.3104	21.2448	26.3381	37.4902	33.8998	41.5116	7.11429	8.29676	3.29172	47.919	42.8268	33.9404	66.3144	80.2678	65.4532	8.67456	11.1028	12.6574	26.2244	26.5077	23.5099	140.045	133.435	144.701	14.3023	13.3615	13.3321	35.0157	36.5551	38.4461	61.6321	72.6421	59.9911	46.2482	37.2216	41.3208	36.3244	38.5215	35.8597	61.728	68.8513	57.2752	39.0643	47.2245
BnCDC5-C05	BnaC05g07200D	Transcription factor	32.2921	44.8962	53.6581	28.0037	29.6144	27.5989	20.6572	14.6057	19.75	58.076	62.6947	52.8928	26.0093	30.1712	30.4637	13.4126	12.5845	12.3904	38.7909	39.7807	39.8062	18.3183	21.883	22.3685	13.6813	12.7325	12.4477	41.1347	39.4372	42.6659	29.3672	28.305	28.0608	18.0456	18.8558	17.8715	64.6572	61.5949	59.4182	52.9866	52.5134	54.4045	31.5457	30.772	32.0491	24.2605	26.0192
BnPHV-C05	BnaC05g23470D	Transcription factor	12.9811	15.3657	18.8032	4.69809	6.6531	6.06735	1.29228	2.15278	1.8474	11.5478	12.0303	12.2091	4.59941	3.83182	4.23077	1.23303	1.28476	1.84375	25.0198	25.2321	22.7139	7.93144	8.06704	8.77119	2.70692	2.01362	2.12279	18.9419	23.9712	20.8228	6.52667	5.91739	6.00771	3.7808	3.17678	3.40132	17.7954	17.8385	18.9613	9.86772	11.406	12.5111	4.85047	7.20292	4.00033	3.00781	2.68506
BnNAC019-C06	BnaC06g05930D	Transcription factor	13.8396	9.4094	7.8702	32.0055	30.4875	25.1005	21.0596	21.4795	16.4485	0.811125	9.65262	4.42459	45.8227	43.3362	48.2867	40.5174	39.2017	40.9478	4.26039	4.14112	1.79077	25.5206	20.2408	14.4035	53.4301	43.8112	45.1438	3.63404	2.94657	1.21732	22.3567	15.4908	22.399	28.9189	26.3855	32.616	35.1432	30.195	44.8293	41.7772	34.1175	34.6253	66.7165	60.1109	79.6378	72.0463	74.4357
BnCRF11-C06	BnaC06g30140D	Transcription factor	22.5451	18.7075	21.6146	14.3733	11.8822	15.7393	6.63712	3.24827	4.81759	19.0589	16.8004	21.5935	8.46806	6.1551	9.90312	3.12731	4.53864	3.91944	40.5099	38.2365	39.1023	12.2103	15.0634	16.2675	4.16508	3.95425	3.37975	0	0	0.0642047	1.25285	3.52956	2.54888	0	0.148222	0.074434	25.1667	26.3005	25.5357	22.9272	17.5898	20.7496	6.81709	7.86837	6.97761	2.60711	2.05519
BnWHY2-C06	BnaC06g32390D	Transcription factor	73.993	71.5048	70.591	25.1479	24.1584	29.2597	14.2267	12.5822	16.4655	70.4471	65.9996	74.0266	19.8623	21.9226	25.5489	16.2465	14.3953	14.1067	74.4761	76.7203	69.3697	21.162	17.0313	20.5207	18.201	15.517	18.4821	3.90028	2.54957	6.67094	5.64214	3.31741	4.48023	2.43463	3.44484	4.17217	36.5685	43.851	50.8608	40.6165	41.4208	38.128	23.1225	30.9707	30.7912	11.4265	14.1565
BnHB33-C06	BnaC06g36000D	Transcription factor	38.6092	43.6793	41.9092	9.01558	9.11165	10.01	2.23042	2.77924	2.67745	62.0099	72.6828	56.982	3.21133	1.91445	4.2334	1.06407	0.0650225	0.286488	102.854	110.149	108.339	28.3057	22.7469	25.1633	5.9138	4.51104	5.04801	1.37824	1.04962	0.413921	5.38465	3.63443	4.69495	0.159457	0.159262	0.106637	28.4833	32.745	33.5349	14.7334	12.2114	13.7979	2.8434	5.14079	4.04918	2.96608	3.11421
BnLEC1-C07	BnaC07g14150D	Transcription factor	156.279	159.186	157.559	24.4498	26.3375	28.6449	1.12515	0.563171	3.62903	159.41	148.96	154.194	9.94893	14.2548	15.652	0.292788	0.679874	0.299551	190.757	185.303	178.514	6.96103	5.08208	5.49365	0.278534	0.548458	0.538591	115.37	131.448	135.529	26.311	26.1605	27.3633	7.31751	4.53316	5.20333	92.7213	86.8546	87.6601	37.8229	49.4285	48.6473	8.29438	11.4412	8.59994	5.07316	4.73631
BnAPRR2-C07	BnaC07g35020D	Transcription factor	22.6457	22.8969	26.5516	13.8103	15.0522	11.6438	6.8037	5.84379	5.5175	21.7041	26.1722	18.7472	11.2133	9.01108	12.3343	3.24587	4.17055	3.94074	30.1208	22.9912	23.1655	11.3893	11.5385	8.65694	3.04668	3.28334	2.70679	40.6563	31.9654	29.3566	9.79085	12.9439	12.255	6.90055	4.92294	4.28514	31.3649	34.8177	28.9613	27.3009	22.3477	24.9481	13.2793	12.6838	15.8899	17.9124	18.9901
BnbZIP60-C08	BnaC08g05600D	Transcription factor	37.3258	43.9575	40.4278	27.5269	30.2267	23.181	27.5867	31.2826	32.4864	33.8319	34.629	37.4238	27.2369	26.3381	31.2357	41.4429	33.1615	39.4207	149.21	144.988	159.16	30.8539	32.079	30.0608	19.4995	18.254	17.6165	239.149	243.798	243.661	52.5795	66.4732	50.3925	45.6047	43.9563	49.1598	34.5096	39.4734	33.64	49.7451	48.5126	45.0696	54.6426	60.5746	47.7044	20.1034	19.478
BnWRI1-C08	BnaC08g25150D	Transcription factor	115.706	110.352	106.248	57.4298	54.9605	60.8678	19.5001	18.8576	23.5685	97.6497	91.4756	88.9114	33.182	44.354	37.8293	15.6242	15.7862	14.6429	119.066	111.099	111.821	54.2679	46.3315	51.9706	14.0694	12.5673	12.8896	56.8819	58.1185	61.0199	174.373	180.658	182.419	13.0176	13.5104	11.2415	205.618	206.553	208.097	144.514	134.936	133.933	51.7346	66.0184	48.2369	44.451	45.7622
BnCRF6-C08	BnaC08g31500D	Transcription factor	19.5824	23.4255	28.0704	11.3225	12.3142	10.8669	8.4221	5.31333	8.00385	18.3445	15.1438	14.1949	11.822	6.0698	18.8117	5.02246	5.53969	4.11078	72.6712	70.6072	69.0993	5.66163	6.53833	6.73126	2.22971	2.03844	2.07876	179.223	172.501	167.661	20.9887	15.4309	21.9879	10.0896	9.04572	10.679	10.2392	7.07701	8.64203	8.9981	10.9513	11.0682	7.11405	11.7572	8.88919	7.55308	11.4253
BnGLYI7-A02	BnaA02g19970D	Other	9.08895	5.72414	6.5832	4.39037	3.2213	4.14732	37.9093	41.5134	46.0929	6.08579	7.57416	7.82267	14.2572	19.513	19.1397	61.2204	59.4458	63.4546	2.10582	1.46277	2.09501	18.6057	17.5309	19.4381	119.816	122.563	125.334	3.06103	3.15826	5.59525	17.7563	18.0936	13.6263	69.7049	73.6087	63.4363	4.33112	5.79601	2.351	10.4872	7.44802	6.00469	17.9156	33.0221	26.6006	15.1337	17.5254
BnRBGD2-A03	BnaA03g15410D	Other	50.7748	60.8828	61.976	34.9467	38.6345	34.0638	17.9473	15.0517	20.2207	65.273	76.9111	69.3865	26.6848	26.7455	36.8265	21.9489	22.221	19.4184	46.6265	48.3313	52.7655	21.9061	21.1471	23.821	15.1811	14.6982	15.9454	57.363	58.7146	58.9939	24.4377	20.7431	26.0745	16.0512	14.3228	17.1614	48.1743	50.8146	47.2708	48.3414	43.7179	41.6065	26.9172	31.017	31.9233	17.0032	17.2598
BnGAPC-A06	BnaA06g08510D	Other	961.552	1000.74	939.509	665.946	673.047	670.001	312.856	292.75	335.305	1190.04	1157.96	1192.46	491.916	511.596	494.401	268.73	280.031	269.417	1107.59	1099.32	1096.52	386.652	365.327	388.804	181.053	182.914	184.457	1276.41	1308.35	1336.08	614.355	631.305	622.882	342.368	332.849	345.441	927.446	923.75	937.246	788.198	786.943	829.68	486.4	494.662	501.811	515.857	529.718
BnHVA22B-A06	BnaA06g21930D	Other	0.124346	0.107821	0	1.73666	0.634351	1.59258	17.3335	17.4339	13.2819	0.213776	0	0	5.80792	0.269798	1.99539	22.2686	22.8307	21.4507	0.210533	0.211241	0.108915	8.48764	8.81558	10.2102	193.386	196.374	175.114	0	0.33282	0.106943	0.368263	0.612402	0.849114	10.0112	8.64109	9.17467	0.718614	0.231787	1.10001	0.122794	0.516276	1.36265	7.33042	8.64136	3.67796	3.44851	0.921643
BnPBF1-A07	BnaA07g18820D	Other	92.8664	68.8505	68.5647	46.5237	48.3273	44.2678	21.7216	19.2138	19.0411	76.6207	81.8848	82.2888	35.8983	40.5629	47.7222	16.2238	15.286	19.2056	85.8263	87.4927	84.2546	30.501	36.0926	32.6154	18.5853	19.8892	21.9533	81.2366	88.4984	84.4033	48.2007	50.2501	47.4722	27.4901	22.706	26.8483	58.1217	60.0205	58.3562	54.704	55.4789	55.2674	34.7819	22.8274	23.51	25.8256	31.0022
BnTUA2-A08	BnaA08g02320D	Other	332.915	267.9	275.055	170.164	181.535	160.443	34.1568	43.7407	38.6615	275.257	275.156	287.092	104.96	112.736	118.237	22.1169	18.6649	21.5811	332.788	326.795	340.493	128.022	123.083	117.914	27.1112	24.7758	26.66	305.094	308.228	308.085	159.941	156.652	157.232	71.1558	72.8235	73.7438	275.946	282.494	282.882	213.738	214.424	209.089	111.731	116.104	126.58	162.497	163.619
BnAAC2-A10	BnaA10g19870D	Other	259.942	236.599	240.322	136.83	140.575	140.056	51.1077	39.3066	50.3703	319.043	308.514	315.153	94.5687	107.061	118.974	53.7056	54.0902	49.289	247.635	251.664	252.922	57.2911	58.8111	55.639	22.3838	21.2665	18.2328	244.499	250.208	263.608	93.5965	90.9534	100.982	42.1502	39.8682	47.3783	198.871	195.89	203.223	191.747	177.234	176.652	83.4281	95.6961	95.3606	74.0771	78.563
BnUAP56b-C03	BnaC03g04670D	Other	55.4576	55.371	49.9849	30.5187	32.7228	35.2178	16.2916	19.0358	19.807	59.6505	59.689	52.1984	23.4593	17.7075	20.423	22.1923	22.2261	20.506	64.887	60.9296	66.1746	24.7707	22.4876	21.654	23.7271	18.8662	18.0671	47.0817	57.952	51.226	32.4622	35.5394	32.0781	22.2009	17.72	18.511	46.8886	41.7683	41.9387	39.1653	40.5722	38.5599	24.9907	21.282	25.8051	29.7563	24.7618
BnGolS1-C04	BnaC04g00330D	Other	0.0751967	0.78244	0.0671977	0.150031	0.153446	0.148168	44.1571	37.809	39.2398	0	0	0.198336	1.338	0.489469	0.884903	107.733	109.63	118.44	0.190975	0.191617	0.13173	6.48861	5.24908	4.82875	187.071	204.685	195.643	0.601473	0.469626	0.323362	2.37548	1.85171	1.10033	73.1729	78.5329	72.5021	0.651858	0	0.443478	0	0	0	1.99918	0.0870956	1.69039	0.617908	0.318486
BnACT3-C04	BnaC04g27010D	Other	39.5475	40.0831	31.957	21.9296	25.0043	24.1442	9.69749	8.00894	9.18664	40.3238	36.2073	46.3288	14.2117	18.9415	18.5661	8.92239	8.63267	7.77612	37.9313	34.3512	39.2922	17.0002	15.8312	14.9476	6.70658	7.17036	7.64924	34.3062	38.052	37.4048	19.1572	19.1662	19.854	13.5908	11.8513	12.0078	28.5182	33.9182	28.8959	19.6828	26.9115	24.4145	15.6228	14.436	13.813	14.8009	11.8051
BnGAPC-C05	BnaC05g09880D	Other	743.951	711.024	689.698	607.258	598.094	591.491	254.115	241.123	270.255	894.639	859.405	863.903	433.285	469.823	456.939	223.361	232.215	219.024	809.769	797.775	804.231	298.682	312.946	305.415	163.21	161.529	163.966	1021.32	1011.81	1002.31	525.517	500.803	517.571	294.681	285.522	288.419	778.084	787.705	760.59	689.776	697.901	704.634	425.841	425.77	403.6	498.452	494.093
BnFDM1-C05	BnaC05g12130D	Other	60.4414	85.9428	77.5371	58.8736	57.0185	56.3364	21.4896	15.663	18.6396	95.8569	97.0872	99.474	38.1098	34.8845	43.5519	14.345	13.7141	16.886	105.891	105.274	108.803	39.839	39.7095	36.5037	15.473	15.2838	16.3821	102.727	103.171	109.526	48.2568	49.8544	45.9722	18.4481	19.1079	19.1658	89.5319	90.7398	83.5089	65.2183	57.5046	63.866	31.9896	28.2499	33.5863	26.2034	26.4187
BnUBQ5-C08	BnaC08g32090D	Other	266.639	261.238	267.92	165.569	163.145	148.048	60.9912	56.1578	55.539	316.367	355.397	346.21	102.643	98.0874	110.944	58.3043	62.858	58.0813	329.109	348.171	347.391	72.1034	70.537	71.0542	45.3527	51.0159	50.8036	266.734	281.959	273.331	124.484	132.968	109.23	61.8885	53.3979	62.9169	205.519	208.037	210.143	181.879	209.095	208.712	112.858	119.751	103.134	69.3297	63.0475
[truncated: 25 more columns]
