# Supplementary material for: Transcriptome and Regional Association Analyses Reveal the Effects of Oleosin Genes on the Accumulation of Oil Content in Brassica napus
Source: Plants (Basel). 2022 Nov 16;11(22):3140. doi: 10.3390/plants11223140 (PMC9698637; doi:10.3390/plants11223140)
Supplement: Supplementary file 1 [file plants-11-03140-s001.zip › Table S10.xlsx]

## Sheet: Sheet1
Table S10. Primers used for qRT-PCR.
Gene name	Gene ID	Forward primer(5'-3')	Reverse primer(5'-3')	Product length (bp)
BnEF	BnaC08g43450D	ATCAACGAGCCCAAGAGG	TCCCAACACGACCCACT	103
BnOLEO4-A02	BnaA02g29000D	GGCGTATGGCTGATGCAGTA	ACGCTATATGGGCCCTCCTT	141
BnOLEO7-A03	BnaA03g27410D	AGTATTCCATGATTGGCCGA	AGCAGGGACAAGGATTGGAC	225
BnOLEO4-A09	BnaA09g02110D	GTAGGAGTTCCCGTTGGTGG	GATAGCGGCCGGGACAATAA	129
BnOLEO1-C01	BnaC01g17050D	AACCCATCACGATGTCACAAACC	ACCGACAAGGGTGAGACTGG	172
BnOLEO2-C04	BnaC04g32530D	CTTGGGACCAAATAAGACATTCCC	TGAAGAGCAGGAAAAGCGGT	116
BnOLEO3-C09	BnaC09g27370D	CTCTACAGGCACATGACGGG	GGACTCCAATGTTGTGCTGC	112
